# Supplementary material for: N-Heterocyclic carbene-based C-centered Au(I)-Ag(I) clusters with intense phosphorescence and organelle-selective translocation in cells
Source: PubMed Central journal article supplement (PMC9365809; doi:10.1038/s41467-022-31891-3), 2022-08-10
Supplement: 41467_2022_31891_MOESM1_ESM.pdf [file 41467_2022_31891_MOESM1_ESM.pdf]

## Supplementary Information

### ***N*-Heterocyclic carbene-based *C*-centered Au(I)-Ag(I) clusters with intense phosphorescence and organelle-selective translocation in cells**

Zhen Lei<sup>1,†</sup>, Mizuki Endo<sup>1,†</sup>, Hitoshi Ube<sup>1</sup>, Takafumi Shiraogawa<sup>2</sup>, Pei Zhao<sup>2</sup>, Koichi Nagata<sup>1,‡</sup>, Xiao-Li Pei<sup>1</sup>, Tomoya Eguchi<sup>3</sup>, Toshiaki Kamachi<sup>3</sup>, Masahiro Ehara<sup>2\*</sup>, Takeaki Ozawa<sup>1\*</sup>, Mitsuhiro Shionoya<sup>1\*</sup>

<sup>1</sup>Department of Chemistry, Graduate School of Science, The University of Tokyo, 7-3-1 Hongo, Bunkyo-ku, Tokyo 113-0033, Japan.

<sup>2</sup>Research Center for Computational Science, Institute for Molecular Science and SOKENDAI, Myodaiji, Okazaki, Aichi 444-8585, Japan.

<sup>3</sup>Department of Life Science and Technology, Tokyo Institute of Technology, 2-12-1-M6-7 Ookayama, Meguro-ku, Tokyo 152-8550, Japan.

<sup>†</sup>These authors contributed equally: Zhen Lei, Mizuki Endo.

<sup>‡</sup>Present address: Department of Chemistry, Graduate School of Science, Tohoku University, Aoba-ku, Sendai, Miyagi 980-8578, Japan.

\*Corresponding authors: ehara@ims.ac.jp; ozawa@chem.s.u-tokyo.ac.jp; shionoya@chem.s.u-tokyo.ac.jp

## Table of Contents

### Supplementary Methods

1. Materials and reagents
2. Analytical measurements and instrumentation
3. Synthesis and characterizations
  - 3.1. Imidazolium and benzimidazolium halides **1a-d·HI** and **1d·HBr**
  - 3.2. Homometallic CAu<sup>I</sup><sub>6</sub> clusters **2a-d**
  - 3.3. Analysis of complex formation between **2a-d** and AgBF<sub>4</sub>
  - 3.4. Heterometallic CAu<sup>I</sup><sub>6</sub>Ag<sup>I</sup><sub>2</sub> clusters **3a-d**
4. X-ray crystallography
5. Computation details
6. Bioimaging experiments
  - 6.1. Cell culture
  - 6.2. Cytotoxicity assay of the clusters
  - 6.3. Luminescence imaging of live cells incubated with cluster complexes
  - 6.4. Phosphorescent lifetime imaging microscopy (PLIM) measurement

### Supplementary Discussion

7. Results and discussion of CAu<sup>I</sup><sub>6</sub> clusters **2a-d**
8. Additional results and discussion of theoretical calculation of CAu<sup>I</sup><sub>6</sub>Ag<sup>I</sup><sub>2</sub> clusters **3a-d** and **4**
9. Additional results and discussion of bioimaging of CAu<sup>I</sup><sub>6</sub>Ag<sup>I</sup><sub>2</sub> clusters **3a-d** and **4**
10. Supplementary figures and tables
  - Supplementary Fig. 1. Molecular structures and ORTEP-style illustration of **1a-c·HI**
  - Supplementary Table 1. Crystallographic experimental information of **1a·HI**
  - Supplementary Table 2. Crystallographic experimental information of **1b·HI**
  - Supplementary Table 3. Crystallographic experimental information of **1c·HI**
  - Supplementary Fig. 2. <sup>1</sup>H NMR spectrum of **1a·HI**
  - Supplementary Fig. 3. <sup>1</sup>H NMR spectrum of **1b·HI**
  - Supplementary Fig. 4. <sup>1</sup>H NMR spectrum of **1c·HI**
  - Supplementary Fig. 5. Structures and photochemical properties of CAu<sup>I</sup><sub>6</sub> clusters **2a-d**
  - Supplementary Table 4. Crystallographic experimental information of **2a**
  - Supplementary Table 5. Crystallographic experimental information of **2b**
  - Supplementary Table 6. Crystallographic experimental information of **2c**
  - Supplementary Table 7. Crystallographic experimental information of **2d**
  - Supplementary Fig. 6. ORTEP-style illustration of **2a-d**, and schematic illustration of intramolecular C–H···Au interactions in CAu<sup>I</sup><sub>6</sub> clusters
  - Supplementary Fig. 7. Schematic illustration of intramolecular C–H···Au interactions in Au nanoclusters
  - Supplementary Table 8. Key structural parameters of **2a-d** and some reported CAu<sup>I</sup><sub>6</sub> clusters
  - Supplementary Fig. 8. <sup>1</sup>H NMR spectrum of **2a**
  - Supplementary Fig. 9. <sup>1</sup>H-<sup>1</sup>H COSY NMR spectrum of **2a**
  - Supplementary Fig. 10. <sup>13</sup>C NMR spectrum of **2a**
  - Supplementary Fig. 11. <sup>1</sup>H-<sup>13</sup>C HSQC spectrum of **2a**
  - Supplementary Fig. 12. <sup>13</sup>C DEPT135 NMR spectrum of **2a**
  - Supplementary Fig. 13. <sup>1</sup>H NMR spectrum of **2b**
  - Supplementary Fig. 14. <sup>1</sup>H-<sup>1</sup>H COSY NMR spectrum of **2b**
  - Supplementary Fig. 15. <sup>13</sup>C NMR spectrum of **2b**
  - Supplementary Fig. 16. <sup>1</sup>H-<sup>13</sup>C HSQC spectrum of **2b**
  - Supplementary Fig. 17. <sup>13</sup>C DEPT135 NMR spectrum of **2b**

Supplementary Fig. 18.  $^1\text{H}$  NMR spectrum of **2c**  
 Supplementary Fig. 19.  $^1\text{H}$ - $^1\text{H}$  COSY NMR spectrum of **2c**  
 Supplementary Fig. 20.  $^{13}\text{C}$  NMR spectrum of **2c**  
 Supplementary Fig. 21.  $^1\text{H}$ - $^{13}\text{C}$  HSQC spectrum of **2c**  
 Supplementary Fig. 22.  $^{13}\text{C}$  DEPT135 NMR spectrum of **2c**  
 Supplementary Fig. 23.  $^1\text{H}$  NMR spectrum of **2d**  
 Supplementary Fig. 24.  $^1\text{H}$ - $^1\text{H}$  COSY NMR spectrum of **2d**  
 Supplementary Fig. 25.  $^{13}\text{C}$  NMR spectrum of **2d**  
 Supplementary Fig. 26.  $^1\text{H}$ - $^{13}\text{C}$  HSQC spectrum of **2d**  
 Supplementary Fig. 27.  $^{13}\text{C}$  DEPT135 NMR spectrum of **2d**  
 Supplementary Fig. 28. MS spectra of **2a-d**  
 Supplementary Fig. 29. Excitation and emission spectra of **2a-d** in the solid state  
 Supplementary Table 9. Cartesian coordinates of calculated structure of **2b**  
 Supplementary Table 10. Cartesian coordinates of calculated structure of **2d**  
 Supplementary Fig. 30. Calculated frontier orbitals and energy level of **2b**  
 Supplementary Fig. 31. Calculated frontier orbitals and energy level of **2d**  
 Supplementary Table 11. Cartesian coordinates of calculated structures of LiPr, BLiPr, **1b** and **1d**  
 Supplementary Table 12. Cartesian coordinates of calculated structures of LiPr-Au<sup>+</sup>, BLiPr-Au<sup>+</sup>, **1b**-Au<sup>+</sup> and **1d**-Au<sup>+</sup>  
 Supplementary Fig. 32. Calculated frontier orbitals of ligands LiPr, BLiPr, **1d** and **1b**  
 Supplementary Fig. 33. Calculated frontier orbitals of LiPr-Au<sup>+</sup>, BLiPr-Au<sup>+</sup>, **1d**-Au<sup>+</sup> and **1b**-Au<sup>+</sup>  
 Supplementary Fig. 34. Complexation of **2a** with AgBF<sub>4</sub>  
 Supplementary Fig. 35. Complexation of **2b** with AgBF<sub>4</sub>  
 Supplementary Fig. 36. Complexation of **2c** with AgBF<sub>4</sub>  
 Supplementary Fig. 37. Complexation of **2d** with AgBF<sub>4</sub>  
 Supplementary Fig. 38. Full MS spectra of complexation of **2a** with AgBF<sub>4</sub>  
 Supplementary Fig. 39. Full MS spectra of complexation of **2b** with AgBF<sub>4</sub>  
 Supplementary Fig. 40. Full MS spectra of complexation of **2c** with AgBF<sub>4</sub>  
 Supplementary Fig. 41. Full MS spectra of complexation of **2d** with AgBF<sub>4</sub>  
 Supplementary Fig. 42. Full  $^1\text{H}$  NMR spectra of complexation of **2a** with AgBF<sub>4</sub>  
 Supplementary Fig. 43. Full  $^1\text{H}$  NMR spectra of complexation of **2b** with AgBF<sub>4</sub>  
 Supplementary Fig. 44. Full  $^1\text{H}$  NMR spectra of complexation of **2c** with AgBF<sub>4</sub>  
 Supplementary Fig. 45. Full  $^1\text{H}$  NMR spectra of complexation of **2d** with AgBF<sub>4</sub>  
 Supplementary Fig. 46. Complexation of **2b** with AgBF<sub>4</sub> (CH<sub>2</sub>Cl<sub>2</sub>/CH<sub>3</sub>CN = 9:1, v:v)  
 Supplementary Table 13. Key structural parameters of **3a-d** and **4**  
 Supplementary Table 14. Crystallographic experimental information of **3a**  
 Supplementary Table 15. Crystallographic experimental information of **3b**  
 Supplementary Table 16. Crystallographic experimental information of **3c**  
 Supplementary Table 17. Crystallographic experimental information of **3d**  
 Supplementary Fig. 47. ORTEP-style illustration of **3a-d**, and schematic illustration of intramolecular C-H $\cdots$ Au interactions in CAu<sup>1</sup><sub>6</sub>Ag<sup>1</sup><sub>2</sub> clusters  
 Supplementary Fig. 48. Excitation and emission spectra of **3a-d** and **4** in the solid state  
 Supplementary Fig. 49.  $^1\text{H}$  NMR spectrum of **3a**  
 Supplementary Fig. 50.  $^1\text{H}$ - $^1\text{H}$  COSY NMR spectrum of **3a**  
 Supplementary Fig. 51.  $^{13}\text{C}$  NMR spectrum of **3a**  
 Supplementary Fig. 52.  $^1\text{H}$ - $^{13}\text{C}$  HSQC spectrum of **3a**  
 Supplementary Fig. 53.  $^{13}\text{C}$  DEPT135 NMR spectrum of **3a**  
 Supplementary Fig. 54.  $^1\text{H}$  NMR spectrum of **3b**  
 Supplementary Fig. 55.  $^1\text{H}$ - $^1\text{H}$  COSY NMR spectrum of **3b**  
 Supplementary Fig. 56.  $^{13}\text{C}$  NMR spectrum of **3b**

Supplementary Fig. 57.  $^1\text{H}$ - $^{13}\text{C}$  HSQC spectrum of **3b**  
 Supplementary Fig. 58.  $^{13}\text{C}$  DEPT135 NMR spectrum of **3b**  
 Supplementary Fig. 59.  $^1\text{H}$  NMR spectrum of **3c**  
 Supplementary Fig. 60.  $^1\text{H}$ - $^1\text{H}$  COSY NMR spectrum of **3c**  
 Supplementary Fig. 61.  $^{13}\text{C}$  NMR spectrum of **3c**  
 Supplementary Fig. 62.  $^1\text{H}$ - $^{13}\text{C}$  HSQC spectrum of **3c**  
 Supplementary Fig. 63.  $^1\text{H}$  NMR spectrum of **3d**  
 Supplementary Fig. 64.  $^1\text{H}$ - $^1\text{H}$  COSY NMR spectrum of **3d**  
 Supplementary Fig. 65. MS spectra of **3a-d**  
 Supplementary Fig. 66. Excitation and emission spectra of **3a-d** and **4** in solution  
 Supplementary Fig. 67. TD-DFT calculations for  $\text{CAu}^1_6\text{Ag}^1_2$  cluster **4**  
 Supplementary Table 18. Excited states of **3b** with oscillator strength (f) larger than 0.02  
 Supplementary Table 19. Excited states of **3d** with oscillator strength (f) larger than 0.02  
 Supplementary Table 20. Excited states of **4** with oscillator strength (f) larger than 0.02  
 Supplementary Fig. 68. Involved molecular orbitals of **3b**  
 Supplementary Fig. 69. Involved molecular orbitals of **3d**  
 Supplementary Fig. 70. Involved molecular orbitals of **4**  
 Supplementary Table 21. Phosphorescence energies of **3b**, **3d** and **4**  
 Supplementary Table 22. Phosphorescence energies of **4** with different basis set and/or functionals  
 Supplementary Fig. 71. Au–Au and Au–Ag distances of **3b**, **3d** and **4** in XRD, ground state and excited state structures  
 Supplementary Table 23. Key structural parameters of **3b**, **3d** and **4** in XRD, ground state and excited state structures  
 Supplementary Table 24. Orbital composition analysis of **3b** with Mulliken partition  
 Supplementary Table 25. Orbital composition analysis of **3d** with Mulliken partition  
 Supplementary Table 26. Orbital composition analysis of **4** with Mulliken partition  
 Supplementary Table 27. Calculated radiative rate constants of the low-lying spin-orbit states of **3b**, **3d** and **4** by ZORA (DZ) and their main components  
 Supplementary Table 28. Singlet and triplet components and spin-orbit coupling (SO) of the low-lying spin-orbit states of **3b**, **3d** and **4**  
 Supplementary Fig. 72. The optimized structures and the corresponding bond length of **3d** at the  $T_1$  state and MECP  
 Supplementary Table 29. MECP ( $T_1/S_0$ ) energies of **3b**, **3d** and **4** calculated by B3LYP/LanL2DZ, D95  
 Supplementary Fig. 73. UV-vis absorption spectra of **3a-d** and **4** (DMSO/PBS = 1:1000, v:v)  
 Supplementary Fig. 74. Excitation and emission spectra of **3a-c** and **4** (DMSO/PBS = 1:1000, v:v)  
 Supplementary Table 30. Luminescence quantum yield and lifetime data of **3a-d** and **4** in solution  
 Supplementary Fig. 75. Confocal luminescence images of **4** in HeLa  
 Supplementary Fig. 76. Time-lapse images and uptake mechanism study of **4** in HeLa  
 Supplementary Fig. 77. Confocal luminescence images of **3a** in HeLa, HEK293T and COS7  
 Supplementary Fig. 78. Co-localization images, time-lapse images, and PLIM images and lifetime plot of **3a** in HeLa  
 Supplementary Fig. 79. Confocal luminescence images of **3b** in HeLa, HEK293T and COS7  
 Supplementary Fig. 80. Co-localization and time-lapse images of **3b** in HeLa  
 Supplementary Fig. 81. Confocal luminescence and time-lapse images of **3c** in HeLa  
 Supplementary Fig. 82. Cytotoxicity of **3a-d** and **4**  
 Supplementary Fig. 83. Reactivities of **3a** and **4** to glutathione (GSH)  
 Supplementary Fig. 84. Time-lapse images to monitor labeled HeLa cells

## Supplementary References

## Supplementary Methods

### 1. Materials and reagents

All commercially available reagents were used as received. Imidazole, *N*-isopropylimidazole, benzimidazole, 2-bromopyridine, 2-bromo-5-methylpyridine, potassium carbonate, sodium carbonate, anhydrous magnesium sulfate, chloroauric acid trihydrate, potassium hydroxide, sodium tetrafluoroborate, trimethylamine and all the dry solvents were purchased from Fujifilm Wako Pure Chemical Corporation. 2-Iodopropane, tetrahydrothiophene (THT) and silver tetrafluoroborate were obtained from Tokyo Chemical Industry Co., LTD. Trimethylsilyldiazomethane (2.0 M in *n*-hexane) was bought from Sigma-Aldrich.

AlamarBlue Cell Viability Reagent, ER-tracker Red, Lyso-tracker Red and CellLight™ Golgi-RFP were purchased from Thermo Fisher Scientific. Wortmaninn, Genistein, Fetal bovine serum (FBS) and phosphate buffered saline (PBS) were obtained from Sigma Aldrich. Sucrose was purchased from Wako.

### 2. Analytical measurements and instrumentation

NMR data were recorded on a Bruker Avance III spectrometer (500 MHz). When CDCl<sub>3</sub> was used, tetramethylsilane was utilized as an internal standard (0 ppm) for <sup>1</sup>H NMR. In the cases where CD<sub>2</sub>Cl<sub>2</sub> was used, a mono-protonated solvent peak of CD<sub>2</sub>Cl<sub>2</sub> (CDHCl<sub>2</sub>, 5.32 ppm) and a solvent peak of CD<sub>2</sub>Cl<sub>2</sub> (<sup>13</sup>CD<sub>2</sub>Cl<sub>2</sub>, 53.84 ppm) were used as internal standards for <sup>1</sup>H NMR and <sup>13</sup>C NMR, respectively. Abbreviations: s, singlet; d, doublet; sept, septet; br, broad. ESI-TOF-MS spectrum were recorded on a Micromass LCT Premier XE. Experimental conditions: ion mode, positive; desolvation temperature, 150 °C; source temperature, 80 °C. UV-vis spectra were recorded on a Jasco V-770 spectrophotometer. Luminescence was measured on a Jasco FP-8300 spectrofluorometer. Luminescence quantum yield was determined on a Hamamatsu C9920-02G spectrometer. Luminescence lifetime was determined on a Hamamatsu C11367-02 spectrometer. Elemental analysis was conducted in the Microanalytical Laboratory, Department of Chemistry, Graduated School of Science, the University of Tokyo.

Luminescence images were taken using a confocal fluorescent microscope (FV-1000D; Olympus Corp.). The absorbance values were measured by a multimode microplate reader (TriStar LB 941; Berthold Technologies GmbH & Co.KG). A fluorescence microscope (Nikon, TE2000-U) equipped with confocal laser scanning system (DCS-120, Becker&Hickl) was used for the phosphorescence lifetime imaging.

### 3. Synthesis and characterizations

#### 3.1. Imidazolium and benzimidazolium halides **1a·HI** and **1d·HBr**

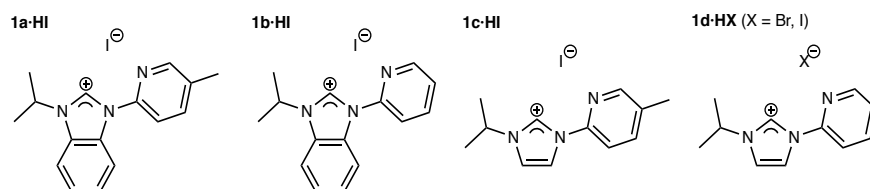

**1a·HI** and **1b·HI** were synthesized by modifying the literature procedures<sup>1-4</sup>.

Under a nitrogen atmosphere, a Schlenk tube was charged with benzimidazole (5.00 g, 42.3 mmol), K<sub>2</sub>CO<sub>3</sub> (3.90 g, 28.2 mmol) and the corresponding bromopyridine derivatives: 2-bromo-5-methylpyridine (2.43 g, 14.1 mmol) for **1a·HI** and 2-bromopyridine (1.37 mL, 14.1 mmol) for **1b·HI**. The reaction mixture was heated at 200 °C for 12 h and then allowed to cool to room temperature. After it was diluted with water (50 mL) and extracted with CH<sub>2</sub>Cl<sub>2</sub> (50 mL × 3), the combined organic phase was washed with sat. Na<sub>2</sub>CO<sub>3</sub> aqueous solution (50 mL × 3), and brine (50 mL), and then dried over anhydrous MgSO<sub>4</sub> before filtration. Concentration under reduced pressure gave a light red oil. This intermediate was

then transferred into a Schlenk flask and dissolved in CH<sub>3</sub>CN (50 mL) under nitrogen atmosphere. 2-Iodopropane (1.51 mL, 15.2 mmol) was added to the solution, and the reaction mixture was heated at reflux for 12 h. After cooling to room temperature, the mixture was concentrated to ca. 5 mL under reduced pressure. When diethyl ether (50 mL) was added to this residue, a pale yellow precipitate was obtained as a crude product. Colorless crystals **1a·HI** and **1b·HI** were obtained by layering diethylether on CH<sub>2</sub>Cl<sub>2</sub>/CH<sub>3</sub>CN (9:1, v:v) solution containing the crude product. Yields: 2.30 g (43%, based on 2-bromo-5-methylpyridine) for **1a·HI**; 1.90 g (37%, based on 2-bromopyridine) for **1b·HI**.

For **1a·HI**: <sup>1</sup>H NMR (500 MHz, CDCl<sub>3</sub>, 300 K, ppm): δ 11.41 (s, 1H, benzimidazolyl), 8.77 (d, *J* = 8.3 Hz, 1H, pyridyl), 8.61–8.59 (m, 1H, benzimidazolyl), 8.46 (d, *J* = 2.0 Hz, 1H, pyridyl), 7.95 (dd, *J* = 8.3, 1.9 Hz, 1H, pyridyl), 7.84–7.82 (m, 1H, benzimidazolyl), 7.71 (td, *J* = 3.8, 1.3 Hz, 2H, benzimidazolyl), 5.39 (sept, *J* = 6.8 Hz, 1H, isopropyl), 2.48 (s, 3H, methyl), 1.99 (d, *J* = 6.8 Hz, 6H, isopropyl).

For **1b·HI**: <sup>1</sup>H NMR (500 MHz, CDCl<sub>3</sub>, 300 K, ppm): δ 11.46 (s, 1H, benzimidazolyl), 8.94 (d, *J* = 8.2 Hz, 1H, pyridyl), 8.67 (m, 2H, benzimidazolyl + pyridyl), 8.16 (td, *J* = 7.9, 1.6 Hz, 1H, pyridyl), 7.86–7.84 (m, 1H, benzimidazolyl), 7.73 (t, *J* = 3.8 Hz, 2H, benzimidazolyl), 7.54 (dd, *J* = 7.4, 4.9 Hz, 1H, pyridyl), 5.42 (sept, *J* = 6.8 Hz, 1H, isopropyl), 2.01 (d, *J* = 6.8 Hz, 6H, isopropyl).

**1c·HI** was synthesized by modifying the literature procedures<sup>1,2,5</sup>.

Under a nitrogen atmosphere, a Schlenk tube was charged with imidazole (2.04 g, 30.0 mmol), K<sub>2</sub>CO<sub>3</sub> (2.76 g, 20.0 mmol) and 2-bromo-5-methylpyridine (1.72 g, 10.0 mmol). The reaction mixture was heated at 190 °C for 12 h and then allowed to cool to room temperature. After it was diluted with water (50 mL) and extracted with CHCl<sub>3</sub> (50 mL × 3), the combined organic phases was washed with sat. Na<sub>2</sub>CO<sub>3</sub> aqueous solution (50 mL × 3), and then dried over anhydrous MgSO<sub>4</sub> before filtration. Concentration under reduced pressure gave a colorless oil, which was then transferred into a Schlenk flask and dissolved in CH<sub>3</sub>CN (50 mL) under a nitrogen atmosphere. 2-Iodopropane (1.70 g, 10.0 mmol) was added to the solution, and the reaction mixture was heated at reflux for 12 h. After cooling to room temperature, the mixture was concentrated to ca. 5 mL under reduced pressure. When diethyl ether (50 mL) was added to this residue, a pale yellow precipitate was obtained as a crude product. Colorless crystals of **1c·HI** were obtained by layering diethylether on CH<sub>2</sub>Cl<sub>2</sub>/CH<sub>3</sub>CN (9:1, v:v) solution containing the crude product. Yield: 1.71 g (52%, based on 2-bromo-5-methylpyridine).

<sup>1</sup>H NMR (500 MHz, CDCl<sub>3</sub>, 300 K, ppm): δ 11.37 (s, 1H, imidazolyl), 8.54 (d, *J* = 8.3 Hz, 1H, pyridyl), 8.32 (d, *J* = 1.3 Hz, 1H, pyridyl), 8.26 (t, *J* = 1.8 Hz, 1H, imidazolyl), 7.86 (dd, *J* = 8.3, 1.8 Hz, 1H, pyridyl), 7.42 (t, *J* = 1.7 Hz, 1H, imidazolyl), 5.27 (sept, *J* = 6.8 Hz, 1H, isopropyl), 2.43 (s, 3H, methyl), 1.73 (d, *J* = 6.7 Hz, 6H, isopropyl).

**1d·HBr**<sup>6</sup> and **1d·HI**<sup>1,5</sup> were synthesized according to the literature procedures.

### 3.2. Homometallic CAu<sub>6</sub> clusters **2a-d**

Complexes **2a-d** were synthesized by modifying the literature procedures<sup>7-11</sup>.

Imidazolium/benzimidazolium halide (**1a·HI** (114 mg, 0.30 mmol) for **2a**; **1b·HI** (110 mg, 0.30 mmol) for **2b**; **1c·HI** (98.7 mg, 0.30 mmol) for **2c**; **1d·HBr** (80.4 mg, 0.30 mmol) or **1d·HI** (94.5 mg, 0.30 mmol) for **2d**) was dissolved in dry CH<sub>2</sub>Cl<sub>2</sub> (10 mL). Tht-AuCl (96.0 mg, 0.30 mmol) was added to the solution, to which K<sub>2</sub>CO<sub>3</sub> (828 mg, 6.0 mmol) was added after stirring for 5 min. After the reaction mixture was stirred for 12 h at room temperature in the dark, it was filtered through a thin layer of Celite. After removing the solvent under reduced pressure, NaBF<sub>4</sub> (165 mg, 1.50 mmol) and CH<sub>3</sub>OH (10 mL) were added to the residue. The resulting suspension was stirred for 5 min CH<sub>2</sub>Cl<sub>2</sub> (5 mL) at room temperature, and a solution of KOH (28.0 mg, 0.50 mmol) in CH<sub>3</sub>OH (3 mL), a solution of AgBF<sub>4</sub> (58.5 mg, 0.30 mmol) in CH<sub>3</sub>OH (1 mL) and H<sub>2</sub>O (50 μL) were added sequentially dropwise to the mixture under stirring, resulting in a brown suspension. After stirring for another 5 min, the suspension was filtered through Celite and evaporated to dryness. The solid was then transferred to a Schlenk flask under

a nitrogen atmosphere, and dry CH<sub>2</sub>Cl<sub>2</sub> (5 mL), Et<sub>3</sub>N (30 μL, 0.20 mmol) and a solution of Me<sub>3</sub>SiCHN<sub>2</sub> in *n*-hexane (2.0 M, 48.0 μL, 0.10 mmol) were added. The resulting mixture was stirred for another 1 h, filtered and placed in a tube, and a layer of dry Et<sub>2</sub>O was added over the CH<sub>2</sub>Cl<sub>2</sub> solution. The product was obtained as colorless blocky crystals within two weeks. Yields: 59.5 mg (40%, based on tht-AuCl) for **2a**; 74.3 mg (52%, based on tht-AuCl) for **2b**; 31.3 mg (24%, based on tht-AuCl) for **2c**; 11.6 mg (9%, based on tht-AuCl (**1d**·HBr)) for **2d**; 10.0 mg (8%, based on tht-AuCl (**1d**·HI)) for **2d**.

For **2a**: <sup>1</sup>H NMR (500 MHz, CD<sub>2</sub>Cl<sub>2</sub>, 300 K, ppm): δ 8.40–8.15 (br, 6H, pyridyl), 7.91–7.38 (br, 30H, pyridyl+benzimidazolylidene), 7.22–6.72 (br, 6H, pyridyl), 5.75 (br, 6H, isopropyl), 1.45 (br, 54H, isopropyl+methyl). <sup>13</sup>C NMR (126 MHz, CD<sub>2</sub>Cl<sub>2</sub>, 300 K, ppm): δ 187.9, 150.3, 148.5, 140.0, 135.6, 134.4, 132.4, 125.9, 125.7, 120.9, 113.8, 113.2, 54.3, 22.4, 18.3. MS (*m/z*; ESI-TOF, positive-mode, solvent: CH<sub>2</sub>Cl<sub>2</sub>): calcd. for [(C)(Au-**1a**)<sub>6</sub>]<sup>2+</sup>, 1350.3; found, 1350.2. Elemental analysis (calcd., found for C<sub>97</sub>H<sub>102</sub>B<sub>2</sub>N<sub>18</sub>F<sub>8</sub>Au<sub>6</sub>·C<sub>4</sub>H<sub>10</sub>O): C (41.13, 41.11), H (3.83, 3.72), N (8.55, 8.85).

For **2b**: <sup>1</sup>H NMR (500 MHz, CD<sub>2</sub>Cl<sub>2</sub>, 300 K, ppm): δ 8.43 (s, 6H, pyridyl), 7.86 (br, 6H, pyridyl), 7.75 (m, 12H, benzimidazolylidene), 7.53 (m, 12H, benzimidazolylidene), 7.30 (br, 6H, pyridyl), 6.45 (br, 6H, pyridyl), 5.71 (br, 6H, isopropyl), 1.49 (br, 36H, isopropyl). <sup>13</sup>C NMR (126 MHz, CD<sub>2</sub>Cl<sub>2</sub>, 300 K, ppm): δ 186.6, 151.0, 149.4, 139.1, 134.1, 132.2, 125.7, 125.7, 123.7, 121.3, 115.0, 113.3, 53.9, 21.9. MS (*m/z*; ESI-TOF, positive-mode, solvent: CH<sub>2</sub>Cl<sub>2</sub>): calcd. for [(C)(Au-**1b**)<sub>6</sub>]<sup>2+</sup>, 1308.3; found, 1308.3. Elemental analysis (calcd., found for C<sub>91</sub>H<sub>90</sub>B<sub>2</sub>N<sub>18</sub>F<sub>8</sub>Au<sub>6</sub>): C (39.16, 38.81), H (3.25, 3.42), N (9.03, 8.91).

For **2c**: <sup>1</sup>H NMR (500 MHz, CD<sub>2</sub>Cl<sub>2</sub>, 300 K, ppm): δ 8.41 (d, *J* = 8.1 Hz, 6H, pyridyl), 8.19 (s, 6H, pyridyl), 7.87 (s, 6H, imidazolylidene), 7.21 (s, 6H, imidazolylidene), 6.58 (d, *J* = 8.1 Hz, 6H, pyridyl), 5.22 (sept, *J* = 6.4 Hz, 6H, isopropyl), 2.08 (s, 18H, methyl), 1.15 (d, *J* = 6.3 Hz, 36H, isopropyl). <sup>13</sup>C NMR (126 MHz, CD<sub>2</sub>Cl<sub>2</sub>, 300 K, ppm): δ 179.8, 149.1, 148.7, 138.6, 133.9, 120.1, 117.2, 116.9, 53.6, 22.8, 18.1. MS (*m/z*; ESI-TOF, positive-mode, solvent: CH<sub>2</sub>Cl<sub>2</sub>): calcd. for [(C)(Au-**1c**)<sub>6</sub>]<sup>2+</sup>, 1200.3; found, 1200.2. Elemental analysis (calcd., found for C<sub>73</sub>H<sub>90</sub>B<sub>2</sub>N<sub>18</sub>F<sub>8</sub>Au<sub>6</sub>): C (34.05, 33.98), H (3.52, 3.69), N (9.79, 9.66).

For **2d**: <sup>1</sup>H NMR (500 MHz, CD<sub>2</sub>Cl<sub>2</sub>, 300 K, ppm): δ 8.58 (d, *J* = 8.2 Hz, 6H, pyridyl), 8.38 (d, *J* = 3.3 Hz, 6H, pyridyl), 7.91 (s, 6H, imidazolylidene), 7.21 (s, 6H, imidazolylidene), 7.06 (dd, *J* = 6.8, 5.2 Hz, 6H, pyridyl), 6.85 (t, *J* = 7.7 Hz, 6H, pyridyl), 5.20 (sept, *J* = 6.7 Hz, 6H, isopropyl), 1.15 (d, *J* = 6.7 Hz, 36H, isopropyl). <sup>13</sup>C NMR (126 MHz, CD<sub>2</sub>Cl<sub>2</sub>, 300 K, ppm): δ 179.9, 150.9, 149.2, 138.2, 123.8, 120.3, 117.5, 117.5, 53.8, 23.0. MS (*m/z*; ESI-TOF, positive-mode, solvent: CH<sub>2</sub>Cl<sub>2</sub>): calcd. for [(C)(Au-**1d**)<sub>6</sub>]<sup>2+</sup>, 1158.2; found, 1158.2. Elemental analysis (calcd., found for C<sub>67</sub>H<sub>78</sub>B<sub>2</sub>N<sub>18</sub>F<sub>8</sub>Au<sub>6</sub>): C (32.31, 32.52), H (3.16, 3.37), N (10.12, 10.20).

### 3.3. Analysis of complex formation between **2a-d** and AgBF<sub>4</sub>

For the analysis of complex formation of silver ions with **2a** and **2b** by UV-visible spectroscopy, emission spectroscopy and mass spectrometry, a 1.2 × 10<sup>-3</sup> mmol CH<sub>2</sub>Cl<sub>2</sub> solution was prepared for each. Twelve samples of this solution (2.7 mL) were prepared and 0, 5.0, 10.0, 15.0, 20.0, 25.0, 30.0, 35.0, 40.0, 45.0, 50.0 and 55.0 μL of CH<sub>3</sub>OH solution of AgBF<sub>4</sub> (1.0 × 10<sup>-2</sup> mol/L) were added to each. The samples were then scale-up with CH<sub>3</sub>OH so that the solution of each sample was prepared to 3.0 mL with CH<sub>2</sub>Cl<sub>2</sub>/CH<sub>3</sub>OH (9:1, v:v), and their UV-vis absorption, emission, and mass spectrometry spectra were measured.

For the analysis of complex formation of silver ions with **2c** and **2d** by UV-visible spectroscopy, emission spectroscopy and mass spectrometry, a 1.2 × 10<sup>-3</sup> mmol CH<sub>2</sub>Cl<sub>2</sub> solution was prepared for each. Ten samples of this solution (2.7 mL) were prepared and 0, 5.0, 10.0, 15.0, 20.0, 25.0, 30.0, 35.0, 40.0 and 45.0 μL of CH<sub>3</sub>OH solution of AgBF<sub>4</sub> (1.0 × 10<sup>-2</sup> mol/L) were added to each. The samples were then scale-up with CH<sub>3</sub>OH so that the solution of each sample was prepared to 3.0 mL with CH<sub>2</sub>Cl<sub>2</sub>/CH<sub>3</sub>OH (9:1, v:v), and their UV-vis absorption, emission, and mass spectrometry spectra were measured.

In the <sup>1</sup>H NMR titration, solutions of **2a-c** (1.0 × 10<sup>-3</sup> mmol, 400 μL) in CD<sub>2</sub>Cl<sub>2</sub>/CD<sub>3</sub>OD (9:1, v:v) were first prepared in an NMR tube and measured. A solution of AgBF<sub>4</sub> (1.0 × 10<sup>-1</sup> mol/L, 5.0 μL) in

CD<sub>3</sub>OD and 45  $\mu$ L of CD<sub>2</sub>Cl<sub>2</sub> were added in turn to each sample in the tube and measured again. This was repeated for 5 times.

In the <sup>1</sup>H NMR titration for **2d**, a solution of **2d** ( $1.0 \times 10^{-4}$  mmol) in CD<sub>2</sub>Cl<sub>2</sub>/CD<sub>3</sub>OD (3:1, v:v, 400  $\mu$ L) were first prepared in an NMR tube and measured. A solution of AgBF<sub>4</sub> ( $1.0 \times 10^{-2}$  mol/L, 5.0  $\mu$ L) in CD<sub>3</sub>OD and 45  $\mu$ L of CD<sub>2</sub>Cl<sub>2</sub> were added in turn to each sample in the tube and measured again. This was repeated for 5 times.

### 3.4. Heterometallic CAu<sup>I</sup><sub>6</sub>Ag<sup>I</sup><sub>2</sub> clusters **3a-d**

Complexes **3a-d** were synthesized by modifying the literature procedures<sup>9-12</sup>.

CAu<sup>I</sup><sub>6</sub> cluster (**2a** (29.6 mg, 10  $\mu$ mol) for **3a**; **2b** (28.8 mg, 10.0  $\mu$ mol) for **3b**; **2c** (25.8 mg, 10  $\mu$ mol) for **3c**; **2d** (24.9 mg, 10  $\mu$ mol) for **3d**) was dissolved in dry CH<sub>2</sub>Cl<sub>2</sub> (3 mL) and AgBF<sub>4</sub> (6.0 mg, 30  $\mu$ mol) in dry CH<sub>3</sub>OH (1 mL) was added to the solution under stirring. The precipitate formed immediately was filtered off, and dry Et<sub>2</sub>O was gently added to the filtrate. Yellow crystals were obtained in one week. Yield: 30.3 mg (90%, based on **2a**) for **3a**; 30.2 mg (93%, based on **2b**) for **3b**; 26.3 mg (89%, based on **2c**) for **3c**; 18.3 mg (64%, based on **2d**) for **3d**.

For **3a**: <sup>1</sup>H NMR (500 MHz, CD<sub>2</sub>Cl<sub>2</sub>, 300 K, ppm):  $\delta$  7.91 (d,  $J$  = 8.2 Hz, 6H), 7.81 (d,  $J$  = 8.3 Hz, 6H), 7.74 (s, 6H), 7.64 (dt,  $J$  = 8.9, 4.9 Hz, 12H), 7.59 (t,  $J$  = 7.7 Hz, 6H), 7.44 (d,  $J$  = 8.2 Hz, 6H), 5.34 (sept,  $J$  = 7.9 Hz, 6H, isopropyl), 1.41 (d,  $J$  = 6.8 Hz, 18H, isopropyl), 1.34 (s, 18H, isopropyl), 1.12 (s, 18H, methyl). <sup>13</sup>C NMR (126 MHz, CD<sub>2</sub>Cl<sub>2</sub>, 300 K, ppm):  $\delta$  183.6, 151.8, 147.4, 143.1, 137.2, 134.5, 131.9, 127.6, 127.1, 123.5, 114.1, 113.4, 54.1, 22.3, 22.1, 16.4. MS ( $m/z$ ; ESI-TOF, positive-mode, solvent: CH<sub>2</sub>Cl<sub>2</sub>): calcd. for [(C)(Au-**1a**)<sub>4</sub>AgAg<sub>2</sub>](BF<sub>4</sub>)<sub>2</sub><sup>+</sup>, 2389.2; found, 2389.2. Elemental analysis (calcd., found for C<sub>97</sub>H<sub>102</sub>B<sub>4</sub>N<sub>18</sub>F<sub>16</sub>Ag<sub>2</sub>Au<sub>6</sub>): C (35.69, 35.56), H (3.15, 3.24), N (7.72, 7.67). Quantum yield: 88% in CH<sub>2</sub>Cl<sub>2</sub> at room temperature; 18% in DMSO/PBS (1:1000, v:v) at room temperature. Lifetime: 3736 ns in CH<sub>2</sub>Cl<sub>2</sub> at room temperature; 190 ns in DMSO/PBS (1:1000, v:v) at room temperature.

For **3b**: <sup>1</sup>H NMR (500 MHz, CD<sub>2</sub>Cl<sub>2</sub>, 300 K, ppm):  $\delta$  8.14 (td,  $J$  = 7.8, 1.8 Hz, 6H), 7.84 (d,  $J$  = 8.4 Hz, 6H), 7.77 (d,  $J$  = 8.0 Hz, 6H), 7.71 (t,  $J$  = 7.8 Hz, 6H), 7.64-7.61 (m, 12H), 7.37 (d,  $J$  = 8.3 Hz, 6H), 6.30 (d,  $J$  = 7.0 Hz, 6H), 5.28 (sept,  $J$  = 6.8 Hz, 6H, isopropyl), 1.44 (d,  $J$  = 6.9 Hz, 18H, isopropyl), 1.33 (d,  $J$  = 6.8 Hz, 18H, isopropyl); <sup>13</sup>C NMR (126 MHz, CD<sub>2</sub>Cl<sub>2</sub>, 300 K, ppm):  $\delta$  183.6, 151.6, 149.8, 143.2, 134.5, 131.9, 127.22, 127.16, 125.7, 124.7, 113.8, 112.9, 54.5, 22.6, 22.1. MS ( $m/z$ ; ESI-TOF, positive-mode, solvent: CH<sub>2</sub>Cl<sub>2</sub>): calcd. for [(C)(Au-**1b**)<sub>6</sub>Ag](BF<sub>4</sub>)<sub>2</sub><sup>+</sup>, 2897.5; found, 2897.5. Elemental analysis (calcd., found for C<sub>91</sub>H<sub>90</sub>B<sub>4</sub>N<sub>18</sub>F<sub>16</sub>Ag<sub>2</sub>Au<sub>6</sub>·CH<sub>2</sub>Cl<sub>2</sub>): C (33.84, 33.72), H (2.84, 3.04), N (7.72, 7.71). Quantum yield: 86% in CH<sub>2</sub>Cl<sub>2</sub> at room temperature; 16% in DMSO/PBS (1:1000, v:v) at room temperature. Lifetime: 1659 ns in CH<sub>2</sub>Cl<sub>2</sub> at room temperature; 159 ns in DMSO/PBS (1:1000, v:v) at room temperature.

For **3c**: <sup>1</sup>H NMR (500 MHz, CD<sub>2</sub>Cl<sub>2</sub>/CD<sub>3</sub>OD = 9:1 (v:v), 300 K, ppm):  $\delta$  7.91 (d,  $J$  = 8.0 Hz, 6H), 7.67 (s, 6H), 7.57 (s, 6H), 7.51 (d,  $J$  = 8.1 Hz, 6H), 7.38 (s, 6H), 4.72 (sept,  $J$  = 6.4 Hz, 6H, isopropyl), 2.14 (s, 18H, methyl), 1.19 (d,  $J$  = 6.4 Hz, 18H, isopropyl), 0.94 (d,  $J$  = 6.2 Hz, 18H, isopropyl); <sup>13</sup>C NMR (126 MHz, CD<sub>2</sub>Cl<sub>2</sub>, 300 K, ppm):  $\delta$  178.6, 150.8, 149.6, 143.1, 136.6, 123.0, 121.8, 119.7, 54.7, 23.0, 22.4, 18.8. MS ( $m/z$ ; ESI-TOF, positive-mode, solvent: CH<sub>2</sub>Cl<sub>2</sub>): calcd. For [(C)(Au-**1c**)<sub>6</sub>Ag](BF<sub>4</sub>)<sub>2</sub><sup>+</sup>, 2681.5; found, 2681.5. Elemental analysis (calcd., found for C<sub>73</sub>H<sub>90</sub>B<sub>4</sub>N<sub>18</sub>F<sub>16</sub>Ag<sub>2</sub>Au<sub>6</sub>): C (29.58, 29.42), H (3.06, 3.19), N (8.50, 8.49). Quantum yield: 14% in CH<sub>2</sub>Cl<sub>2</sub> at room temperature; 1% in DMSO/PBS (1:1000, v:v) at room temperature. Lifetime: 325 ns in CH<sub>2</sub>Cl<sub>2</sub> at room temperature; 4 ns in DMSO/PBS (1:1000, v:v) at room temperature.

For **3d**: <sup>1</sup>H NMR (500 MHz, CD<sub>2</sub>Cl<sub>2</sub>/CD<sub>3</sub>OD = 3:1 (v:v), 300 K, ppm):  $\delta$  8.12 (t,  $J$  = 6.9 Hz, 6H), 7.78 (d,  $J$  = 4.3 Hz, 6H), 7.62 (d,  $J$  = 7.7 Hz, 12H), 7.45 (d,  $J$  = 1.7 Hz, 6H), 7.31 (t,  $J$  = 6.2 Hz, 6H), 4.64 (sept,  $J$  = 6.6 Hz, 6H, isopropyl), 1.16 (d,  $J$  = 6.6 Hz, 18H, isopropyl), 0.96 (d,  $J$  = 6.1 Hz, 18H, isopropyl). MS ( $m/z$ ; ESI-TOF, positive-mode, solvent: CH<sub>2</sub>Cl<sub>2</sub>/CH<sub>3</sub>OH = 9:1 (v:v)): calcd. for [(C)(Au-**1d**)<sub>4</sub>AuAg](BF<sub>4</sub>)<sup>+</sup>, 1939.2; found, 1939.2. Elemental analysis (calcd., found for C<sub>67</sub>H<sub>78</sub>B<sub>4</sub>N<sub>18</sub>F<sub>16</sub>Ag<sub>2</sub>Au<sub>6</sub>·C<sub>4</sub>H<sub>10</sub>O): C (28.87, 29.02), H (3.00, 3.10), N (8.53, 8.73). Quantum yield: 1% in



CH<sub>2</sub>Cl<sub>2</sub>/CH<sub>3</sub>OH (9:1, v:v) at room temperature. Lifetime: 160 ns in CH<sub>2</sub>Cl<sub>2</sub>/CH<sub>3</sub>OH (9:1, v:v) at room temperature.

#### 4. X-ray crystallography

Intensity data of compounds **1a-c·HI**, **2a-d** and **3a-d** were collected on a Rigaku XtaLAB Synergy-DW system (CuK $\alpha$ ) at 93 K. The structures were solved by direct methods, and non-hydrogen atoms except for the disordered BF<sub>4</sub><sup>-</sup> and CH<sub>2</sub>Cl<sub>2</sub> in **2b** were refined anisotropically by the least-squares on  $F^2$  using the SHELXTL program. The hydrogen atoms of organic ligands were generated geometrically; no attempt was made to locate the hydrogen atoms of disordered dichloromethane molecule in **2b** and water molecule in **2d**. See Supplementary Tables 1-7, 14-17 and Supplementary Figures 1, 6, 47 for crystallographic experimental information and ORTEP-style illustration of structures, respectively.

#### 5. Computation details

Density functional theory (DFT) and time-dependent (TD-) DFT calculations were carried out to simulate the adsorption spectra and phosphorescence energies of compounds **3b**, **3d** and **4**. The B3LYP functional<sup>13</sup> was adopted with LanL2DZ<sup>14</sup> (for Au and Ag) and 6-31G(d)<sup>15</sup> (for C, N, H and P) basis sets. The solvent effects of CH<sub>2</sub>Cl<sub>2</sub> used in the experiment were considered by the integral equation formalism of the polarizable continuum model (IEF-PCM) approach<sup>16</sup> with the cavity of the solvent accessible surface. The optimized structures were confirmed as the local minima using the vibrational analysis, and the symmetry of the complexes was not restricted in the geometry optimization. The 200 excited states were solved for simulating the absorption spectra with the non-equilibrium scheme in the PCM. The phosphorescence energies were calculated by the energy difference between the triplet state (T<sub>1</sub>) and the singlet (S<sub>1</sub>) state. The equilibrium scheme of the PCM was used for considering the solvent effect. The other basis sets (SDD<sup>17</sup>, LanL2DZ and 3-21G) and/or functionals (B3LYP-D3<sup>18</sup> and M06<sup>19</sup>) were also employed. All the DFT calculations were conducted by using the Gaussian16 ver. A03<sup>20</sup>. The orbital composition was analyzed using the Multiwfn program<sup>21</sup>.

The phosphorescence lifetimes and radiative rate constants of **3b**, **3d** and **4** were calculated by ZORA method including spin-orbit interaction in the perturbative method<sup>22</sup> implemented in ADF program package<sup>23</sup>. The B3LYP functional combined with DZ basis set was utilized. The minimum energy crossing point (MECP) between S<sub>0</sub> and T<sub>1</sub> states were calculated by the Harvey method<sup>24</sup>. The B3LYP/LanL2DZ, D95 was adopted in the DFT calculations and the electronic structure calculations were conducted on Gaussian 09.B01 program. Because the molecular system is large, loose convergence criteria were adopted (Max Gradient El.: 0.004, RMS Gradient El.: 0.0025, Max Change of X: 0.02, RMS Change in X: 0.0125, Difference in E: 0.000250).

#### 6. Bioimaging experiments

##### 6.1. Cell culture

HeLa, HEK293T, and COS-7 cells were grown in Dulbecco's modified Eagle's medium (DMEM; nacalai tesque Inc.) supplemented with 10% v/v FBS and 1% antibiotic/antimycotic solution (penicillin and streptomycin). All cultured cells were kept at 37 °C in a humidified incubator with 5% CO<sub>2</sub>.

##### 6.2. Cytotoxicity assay of the clusters

The cytotoxicity of the clusters in HeLa cells was evaluated using alamarBlue Cell Viability Reagent. HeLa cells were seeded on 96-well microplate (Thermo Fisher Scientific) at  $5 \times 10^3$  cells/well and then incubated for 24 h at 37 °C under 5% CO<sub>2</sub>. After medium removal, PBS containing clusters at different concentrations (0.2, 0.5, 1, 2, 3, 5, 10 or 20  $\mu$ M in DMSO/PBS, v:v = 1:1000) were added to the wells. The cells were then incubated at 37 °C under 5% CO<sub>2</sub>. If necessary, the medium was replaced with

DMEM 10% FBS. Unlabeled cells were also prepared as control. The medium was then replaced with DMEM 10% FBS containing alamarBlue Cell Viability Reagent and incubated for another 24 h at 37 °C under 5% CO<sub>2</sub>. An absorbance microplate reader was used to measure the OD570 (absorbance value) of each well with background subtraction at 595 nm. The acquired data were analyzed by GraphPad Prism (ver. 8.0).

### 6.3. Luminescence imaging of live cells incubated with cluster complexes

Cells seeded on Glass Based Dishes (AGC Techno Glass Co., Ltd.) were incubated for 24 h at 37 °C under 5% CO<sub>2</sub>. After medium removal, the cells were washed with PBS and incubated with cluster solutions at different concentration (1, 2, 5 or 10 μM in DMSO/PBS, v:v = 1:1000) in the incubator for different time (10, 30 or 60 min) at 37 °C. After medium removal, the cells were washed with PBS for 3 times, and the cells were immersed in PBS. Luminescence imaging was performed with a confocal fluorescent microscope (FV-1000D; Olympus Corp.) with 100× oil-immersion objective lens. Stained cells were excited at a 405 nm semiconductor laser, and the emission was collected with 500–600 nm band path filter (for **3a-c**) or 575–620 nm band path filter (for **4**). The acquired images were analyzed using software (ImageJ).

For tracking the labeling dynamics by time-lapse imaging, adhered HeLa cells were washed with PBS and placed under a confocal fluorescence microscope. A solution of clusters (1 μM in DMSO/PBS, v:v = 1:1000) was then added, and images were taken at a different time. Excitation wavelength was 405 nm, and the laser was turned on only when taking images.

To monitor the labeled cells in long time-lapse imaging, adhered HeLa cells were washed with PBS and incubated with **3a** (1 μM in DMSO/PBS, v:v = 1:1000) for 10 min at 37 °C. The cells were then washed three times with PBS and immersed in DMEM without phenol red (Thermo Fisher Scientific) supplemented with 10% FBS. The excitation wavelength was 405 nm, and the laser was turned on only when taking images.

For inhibitor treatment, the cells were washed with PBS and incubated with PBS containing inhibitors (400 nM Wortmaninn, 0.45 M Sucrose, or 200 μM Genistein) for 30 min at 37 °C. The cells were then stained with **3a** (2 μM in DMSO/PBS, v:v = 1:1000) at 37 °C for 10 min. For non-specific inhibition of endocytosis, the cells washed with PBS were incubated with cooled PBS at 4 °C for 30 min, and then stained with a solution of **3a** (2 μM in DMSO/PBS, v:v = 1:1000) at 4 °C for 10 min. Before imaging, the cells were washed three times with PBS.

For colocalization analysis with ER or Lysosome, the cells were incubated with ER-tracker Red or Lyso-tracker Red for 20 min, and further incubated with **3a** or **3b** (1 μM in DMSO/PBS, v:v = 1:1000) for 10 min at 37 °C. For colocalization analysis with Golgi, the cells were incubated with CellLight™ Golgi-RFP according to the manufacturer's protocol the day before imaging. The settings for image acquisition were to detect signals at 500–550 nm emitted by 405 nm laser excitation for the complexes and signals at 575–620 nm emitted by 559 nm laser excitation for markers.

### 6.4. Phosphorescent lifetime imaging microscopy (PLIM) measurement

HeLa cells were incubated with **3a** (1 μM in DMSO/PBS, v:v = 1:1000) for 10 min followed by washing with PBS for three times and applied for PLIM measurement. Phosphorescence lifetime imaging were performed on a fluorescence microscope (Nikon, TE2000-U) equipped with confocal laser scanning system (DCS-120, Becker&Hickl). **3a** was excited at 405 nm pulsed diode laser (pulse duration 60 ps, range of pulse repetition rate 50 MHz, Becker&Hickl) and detected through a 435 nm long path filter. Cells were maintained at 37 °C, 5% CO<sub>2</sub> and humidified in a Stage Top Incubator during measurement of OC imaging<sup>25</sup>.

## Supplementary Discussion

### 7. Results and discussion of CAu<sup>I</sup><sub>6</sub> clusters **2a-d**

In order to further polynucleate the Au(I) cluster with different metals, a nitrogen donor was introduced into the wing-tip portion of the NHC ligand. Specifically, CAu<sup>I</sup><sub>6</sub> complexes **2a-d**, in which only the NHC ligand is coordinated to Au(I), were synthesized from unsymmetrical bidentate ligands **1a-d**. In the ligands **1a-d** used here, only one of the two isopropyl groups in each of *N,N'*-diisopropyl-imidazolyliene (*IiPr*) and *N,N'*-diisopropyl-benzimidazolyliene (*BIiPr*)<sup>7,8</sup> is substituted with a 2-pyridyl or a 5-methyl-2-pyridyl group. The ligands **1a-d** were synthesized as an HBr or an HI salt according to previously reported literatures or modified methods (see part 3, synthesis and characterizations).

The CAu<sup>I</sup><sub>6</sub> clusters **2a-d** with the general formula [(C)(Au<sup>I</sup>-L)<sub>6</sub>](BF<sub>4</sub>)<sub>2</sub> (L = **1a-d**) were synthesized in 8-52% yields based on the amount of Au<sup>I</sup> used according to previously reported literatures<sup>7-12</sup>, and their molecular structures were determined by single-crystal X-ray diffraction (ScXRD, Supplementary Fig. 5a). All of these Au(I) cluster parts are found to have an octahedral molecular structure almost identical to the previously reported CAu<sup>I</sup><sub>6</sub> clusters protected by PPh<sub>3</sub><sup>26</sup>, *IiPr*<sup>8</sup> or *BIiPr*<sup>7</sup>. The Au-Au distances of **2a-d** were in the range of 2.9179(7)–3.0426(7) Å, which are comparable to those found in the reported clusters (Supplementary Table 8). A notable structural feature of the NHC-protected CAu<sup>I</sup><sub>6</sub> clusters is the intramolecular C–H⋯Au interactions. As shown in Supplementary Fig. 6, the shortest Au⋯H distance in **2a-d** was 2.674 Å, which is significantly shorter than the sum of the van der Waals radii of the gold and hydrogen atoms (2.86 Å). Similar C–H⋯Au interactions were also observed in several Au(0) clusters reported in the last few years<sup>27-31</sup> (Supplementary Fig. 7). These interactions can be important factors contributing to the stability of these clusters. The structures of CAu<sup>I</sup><sub>6</sub> clusters **2a-d** in solution were then analyzed by NMR spectroscopy and MS spectrometry (Supplementary Figs. 8–28). In the <sup>13</sup>C NMR spectra, the signals of the tertiary carbon atoms of the isopropyl groups of **2a-d** overlapped significantly with CD<sub>2</sub>Cl<sub>2</sub>, as confirmed by <sup>1</sup>H-<sup>13</sup>C HSQC experiments, so <sup>13</sup>C DEPT135 NMR experiments were performed to determine the exact chemical shifts of these tertiary carbon atoms. In the MS spectra, four major peaks, including (Au<sup>I</sup>-L<sub>2</sub>)<sup>+</sup>, [(C)(Au<sup>I</sup>-L)<sub>6</sub>]<sup>2+</sup>, [(C)(Au<sup>I</sup>-L)<sub>4</sub>Au]<sup>+</sup> and [(C)(Au<sup>I</sup>-L)<sub>6</sub>](BF<sub>4</sub>)<sup>+</sup> (L = **1a-d**) were observed, and these peaks were confirmed to be peaks due to **2a-d**.

The UV-vis absorption spectra of clusters **2a-d** in CH<sub>2</sub>Cl<sub>2</sub> were very similar to those of [(C)(Au<sup>I</sup>-*IiPr*)<sub>6</sub>](BF<sub>4</sub>)<sub>2</sub> and [(C)(Au<sup>I</sup>-*BIiPr*)<sub>6</sub>](BF<sub>4</sub>)<sub>2</sub>. In other words, **2a** and **2b** with benzimidazolyliene ligands showed slightly red-shifted absorption and much higher molar extinction coefficients than **2c** and **2d** with the imidazolyliene ligands (Supplementary Fig. 5b). It is noteworthy that the emission maxima of clusters **2a-d** were in the range of 482-490 nm and showed similar blue emissions in the solid state (Supplementary Figs. 5c and 29). This blue emission was clearly different from the emission of [(C)(Au<sup>I</sup>-*IiPr*)<sub>6</sub>](BF<sub>4</sub>)<sub>2</sub>, which shows yellow emission, and that of [(C)(Au<sup>I</sup>-*BIiPr*)<sub>6</sub>](BF<sub>4</sub>)<sub>2</sub>, which shows green emission. In other words, clusters **2a-d** showed similar blue emissions due to the pyridyl pendant on each ligand, despite the difference between imidazolyliene (**1c**, **1d**) and benzimidazolyliene (**1a**, **1b**) ligands. Therefore, we analyzed DFT calculations why the absorption spectra of **2b** and **2d** are very similar to [(C)(Au<sup>I</sup>-*IiPr*)<sub>6</sub>](BF<sub>4</sub>)<sub>2</sub> or [(C)(Au<sup>I</sup>-*BIiPr*)<sub>6</sub>](BF<sub>4</sub>)<sub>2</sub>, but their emission spectra are markedly different (Supplementary Tables 9 and 10, Supplementary Figs. 30 and 31).

First, the highest-occupied molecular orbital (HOMO) – lowest-unoccupied molecular orbital (LUMO) gaps of clusters **2b** and **2d** were found to be 3.80 and 3.90 eV, respectively, which are smaller than the HOMO-LUMO gaps of [(C)(Au<sup>I</sup>-*IiPr*)<sub>6</sub>](BF<sub>4</sub>)<sub>2</sub> (4.37 eV) and [(C)(Au<sup>I</sup>-*BIiPr*)<sub>6</sub>](BF<sub>4</sub>)<sub>2</sub> (3.93 eV)<sup>7,8</sup>. On the other hand, the MLCT process is dominant in **2b** and **2d**, which is similar to [(C)(Au<sup>I</sup>-*BIiPr*)<sub>6</sub>](BF<sub>4</sub>)<sub>2</sub>. However, it was found that the pyridyl pendant is mainly involved in the LUMOs, although it does not effectively form an extended π-system with imidazolyliene and benzimidazolyliene (Supplementary Tables 9 and 10, Supplementary Figs. 30 and 31). Analysis of the frontier orbitals of naked ligands *IiPr*, *BIiPr*, **1b** and **1d**, and the corresponding Au(I) cations indicates that the introduction of the pyridyl pendant has indeed significantly changed the electronic structures of the ligands and the corresponding

metal cations. In all cases, this is due to the fact that the LUMOs are located mainly on pyridyl and not on imidazolylidene or benzimidazolylidene (Supplementary Tables 11 and 12, Supplementary Figs. 32 and 33), as in the cases of clusters **2a-d**. The phenyl moiety of benzimidazolylidene plays a major role in the LUMO in [(C)(Au<sup>I</sup>-BIzPr)<sub>6</sub>](BF<sub>4</sub>)<sub>2</sub>, but in the case of **2b**, the contribution from the phenyl moiety was observed only at fairly distant LUMOs, such as LUMO+15. As a result, it is inferred that **2a-d** show similar absorption and emission profiles in terms of energy. The increase in the absorption coefficients of **2a** and **2b** can be attributed to the increased capacity of the benzimidazolylidene ligands **1a** and **1b** for electrons<sup>7</sup>.

## 8. Additional results and discussion of theoretical calculation of CAu<sup>I</sup><sub>6</sub>Ag<sup>I</sup><sub>2</sub> clusters **3a-d** and **4**

The absorption and phosphorescence of not only **3b** and **3d**, but also **4** were theoretically calculated and analyzed (Supplementary Fig. 67). Compared to the CAu<sup>I</sup><sub>6</sub> clusters, the electronic structures of the clusters were significantly altered by the coordination of silver(I) ions. The silver(I) atoms are mainly involved in the LUMO orbitals, while the carbene framework shows a contribution to the HOMO orbitals. In the absorption spectrum of **4**, the lowest peak observed around 400 nm was considered to be transitions between molecular orbitals (MOs) consisting mainly of Au, Ag and the central carbon, and the absorption in the high energy region (< 300 nm) is mainly due to the  $\pi\pi^*$  transition of the ligands, which are quite similar to carbene-protected **3b** and **3d**. The trend of energy shift was reproduced and the first peaks of **3b** and **3d** were obtained as 387 and 388 nm, respectively, while for **4** it was calculated as 403 nm. The trend of the absorption coefficients (**3b** > **3d** > **4**) was also well reproduced. For the phosphorescence energy of **4**, the agreement was not satisfactory. The other basis sets ((SDD and 6-311+G(d) and (LanL2DZ and 3-21G)) and functionals (B3LYP-D3 and M06) were also examined, however, the result was not improved. (Supplementary Table 22) The overestimation of the emission energies of **4** by about 0.7 eV was also observed in the previous work<sup>32</sup>.

Mulliken partition analysis confirmed that even though the core of CAu<sup>I</sup><sub>6</sub>Ag<sup>I</sup><sub>2</sub> is mainly involved in the MOs, the ligands make significant contributions (Supplementary Tables 24–26). For example, the contribution of the imidazolylidene ligand to the HOMO and SOMO–1 of **3d** is more than 20%, and the contribution of the benzimidazolylidene ligand to the HOMO and SOMO–1 of **3b** increases to more than 30%, and even approaching 50% in dppy-protected **4**. Since the compositions of LUMO and SOMO of **3b**, **3d** and **4** are very similar, the involvement of the ligands in the charge transfer processes from HOMO to LUMO and from SOMO to SOMO–1, which correspond to absorption and emission, respectively, is considered to have changed dramatically. For instance, the imidazolylidene ligand of **3d** contributes little to these processes. In the case of **3b**, the contribution of the benzimidazolylidene ligand to the electronic relaxation process from SOMO to SOMO–1 is also only a few percent. Whereas in **4**, ligand-to-metal charge transfer (LMCT) from dppy to Au<sup>I</sup> or CAu<sup>I</sup><sub>6</sub>Ag<sup>I</sup><sub>2</sub> cannot be ignored (about 20%). This is because imidazolylidene **1d** is a stronger electron donor compared to dppy. In other words, carbene decreased the participation of ligands in frontier orbitals in both ground and excited states, and also suppressed the involvement of ligands in the charge transfer processes.

For the calculation of phosphorescence lifetimes and radiative rate constants, although the order of the absolute values of  $\tau$  is different from the experimental values, the trend (**4** > **3b** > **3d**) fits well with each other. However, on the other hand, the  $k_r$  value of **4** was not well reproduced. Note that the excitation energies are different from those of TDDFT(B3LYP/SDD, 6-311+G(d)) because the present calculation used a linear-response theory with a Slater-type DZ basis.

Because the molecular system is large, loose convergence criteria were adopted in the calculation of minimum energy crossing point (MECP) between S<sub>0</sub> and T<sub>1</sub> states.

## 9. Additional results and discussion of bioimaging of CAu<sup>I</sup><sub>6</sub>Ag<sup>I</sup><sub>2</sub> clusters **3a-d** and **4**

It was reported by Li and Wang et al.<sup>33</sup> that, at a concentration of 10  $\mu\text{M}$  in DMSO/PBS (Phosphate buffered saline; 1:99, v:v), cluster **4** went into cell via an energy-dependent, endocytosis-free uptake pathway, and then selectively accumulated in the nucleolus of living cells within 10 min at 310 K (37  $^{\circ}\text{C}$ ).

$\text{CAu}^1_6\text{Ag}^1_2$  clusters **3a-d** and **4** were first dissolved in a mixture of DMSO/PBS (1:1000, v:v) and characterized (Supplementary Figs. 73 and 74). The UV-vis absorption, excitation and emission spectra of the solutions showed that these clusters were stable even in a dilute solution of 1.0  $\mu\text{M}$  in DMSO/PBS. Importantly, the phosphorescence QYs of **3a** and **3b** were significantly reduced to 0.18 and 0.16, respectively, under these conditions, but the emission was strong enough for bioimaging (Supplementary Table 30). On the other hand, **3d** was found to emit almost no light.

Subsequently, viable cells were incubated for 30 or 60 min at 37  $^{\circ}\text{C}$  in a solution containing a different concentration (1.0, 2.0, 5.0 or 10  $\mu\text{M}$ ) of **3a-c** or **4** and observed by confocal microscope (Supplementary Figs. 75-81). The results showed that at high concentrations of the cluster solutions (5.0 or 10  $\mu\text{M}$ ), the cells changed to a round shape and the nuclear membrane took on a shape characteristic of cells under stress. Therefore, we performed an Alamar blue cytotoxicity assay of HeLa cells in which the clusters were treated with different concentrations and/or incubation times (Supplementary Fig. 82). The cells were incubated with the complexes for 10 min, 30 min, 6 h, 24 h, and 48 h. Under some conditions, they were further incubated with DMEM 10% FBS without the complexes for an additional 6 h or 24 h. The cells were then immersed in alamarBlue solution for 24 h in a  $\text{CO}_2$  incubator. The analysis revealed that **3a-d** and **4** significantly reduced viability at concentrations of 3.0–20  $\mu\text{M}$ . The reduced cell viability at higher concentrations of **3a-d** and **4** may be due to an excess of clusters on the cells and increased permeability of the cell membrane. At a lower concentration (1.0  $\mu\text{M}$ ), labeling with **3a** or **3b** for 10 min reduced the viability to 71% or 64%, and labeling with **4** for 10 min reduced the viability to 52%. On the other hand, microscope analysis showed no cytotoxicity after 10-min incubation at 1.0 or 2.0  $\mu\text{M}$ . Therefore, in the following experiments, the effect of clusters of concentrations of 1.0 or 2.0  $\mu\text{M}$  was investigated.

## 10. Supporting figures and tables

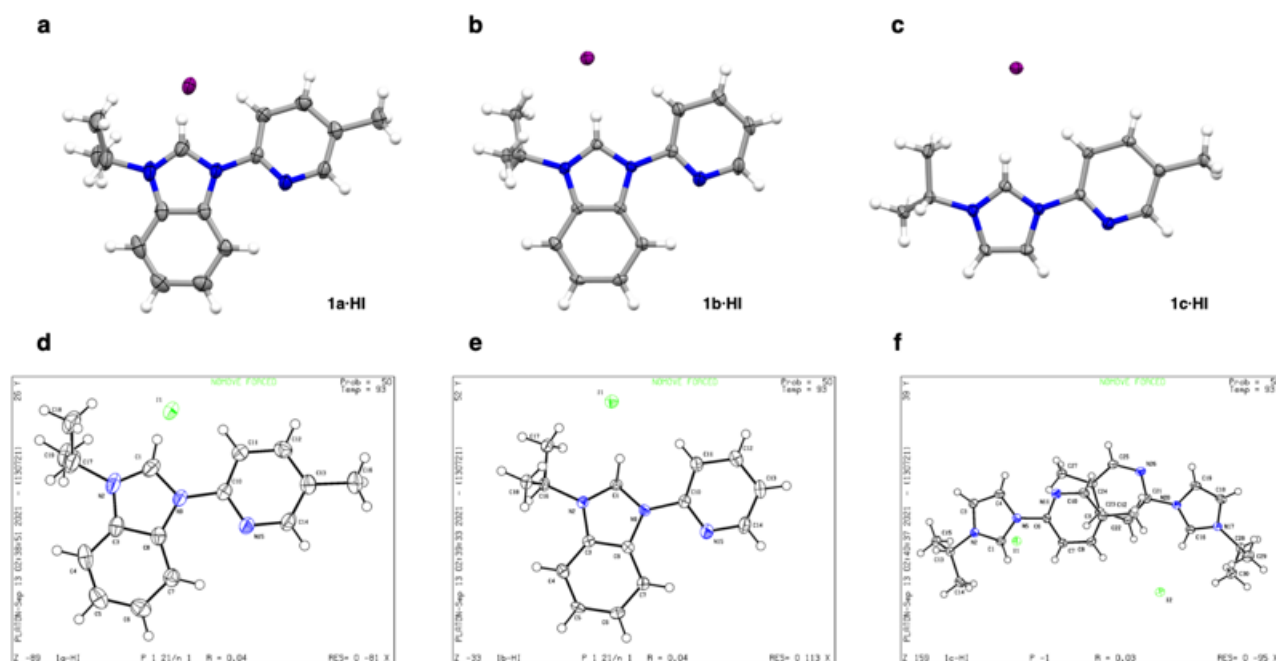

Supplementary Figure 1. Molecular structures and ORTEP-style illustration of **1a·HI** (a,d; CCDC 2103969), **1b·HI** (b,e; CCDC 2103970) and **1c·HI** (c,f; CCDC 2103971)

Supplementary Table 1. Crystallographic experimental information of **1a·HI**

|                                                                                                                         |                                                                                                                                                                                                    |
|-------------------------------------------------------------------------------------------------------------------------|----------------------------------------------------------------------------------------------------------------------------------------------------------------------------------------------------|
| Crystal data                                                                                                            |                                                                                                                                                                                                    |
| Chemical formula                                                                                                        | I·C <sub>16</sub> H <sub>18</sub> N <sub>3</sub>                                                                                                                                                   |
| <i>M<sub>r</sub></i>                                                                                                    | 379.23                                                                                                                                                                                             |
| Crystal system, space group                                                                                             | Monoclinic, <i>P2<sub>1</sub>/n</i>                                                                                                                                                                |
| Temperature (K)                                                                                                         | 93                                                                                                                                                                                                 |
| <i>a</i> , <i>b</i> , <i>c</i> (Å)                                                                                      | 11.21398 (12), 10.60900 (13), 13.14105 (14)                                                                                                                                                        |
| <i>b</i> (°)                                                                                                            | 94.2737 (10)                                                                                                                                                                                       |
| <i>V</i> (Å <sup>3</sup> )                                                                                              | 1559.03 (3)                                                                                                                                                                                        |
| <i>Z</i>                                                                                                                | 4                                                                                                                                                                                                  |
| Radiation type                                                                                                          | Cu <i>K</i> α                                                                                                                                                                                      |
| <i>m</i> (mm <sup>-1</sup> )                                                                                            | 16.08                                                                                                                                                                                              |
| Crystal size (mm)                                                                                                       | 0.08 × 0.05 × 0.05                                                                                                                                                                                 |
| Data collection                                                                                                         |                                                                                                                                                                                                    |
| Diffractometer                                                                                                          | XtaLAB Pro: Kappa single                                                                                                                                                                           |
| Absorption correction                                                                                                   | Multi-scan<br><i>CrysAlis PRO</i> 1.171.39.20a (Rigaku Oxford Diffraction, 2015)<br>Empirical absorption correction using spherical harmonics,<br>implemented in SCALE3 ABSPACK scaling algorithm. |
| <i>T<sub>min</sub></i> , <i>T<sub>max</sub></i>                                                                         | 0.616, 1.000                                                                                                                                                                                       |
| No. of measured, independent and<br>observed [ <i>I</i> > 2 <i>s</i> ( <i>I</i> )] reflections                          | 7278, 3048, 2895                                                                                                                                                                                   |
| <i>R<sub>int</sub></i>                                                                                                  | 0.032                                                                                                                                                                                              |
| ( <i>sin</i> <i>q</i> / <i>l</i> ) <sub>max</sub> (Å <sup>-1</sup> )                                                    | 0.622                                                                                                                                                                                              |
| Refinement                                                                                                              |                                                                                                                                                                                                    |
| <i>R</i> [ <i>F</i> <sup>2</sup> > 2 <i>s</i> ( <i>F</i> <sup>2</sup> )], <i>wR</i> ( <i>F</i> <sup>2</sup> ), <i>S</i> | 0.035, 0.099, 1.06                                                                                                                                                                                 |
| No. of reflections                                                                                                      | 3048                                                                                                                                                                                               |
| No. of parameters                                                                                                       | 184                                                                                                                                                                                                |
| H-atom treatment                                                                                                        | H-atom parameters constrained                                                                                                                                                                      |
| <i>D</i> ρ <sub>max</sub> , <i>D</i> ρ <sub>min</sub> (e Å <sup>-3</sup> )                                              | 1.13, -0.76                                                                                                                                                                                        |

Computer programs: *CrysAlis PRO* 1.171.39.20a (Rigaku OD, 2015), *SHELXS* (Sheldrick, 2008), *SHELXT* (Sheldrick, 2015), *SHELXL* (Sheldrick, 2015), *Olex2* (Dolomanov *et al.*, 2009).

Supplementary Table 2. Crystallographic experimental information of **1b·HI**

|                                                                                                                         |                                                                                                                                                                                                    |
|-------------------------------------------------------------------------------------------------------------------------|----------------------------------------------------------------------------------------------------------------------------------------------------------------------------------------------------|
| Crystal data                                                                                                            |                                                                                                                                                                                                    |
| Chemical formula                                                                                                        | I·C <sub>15</sub> H <sub>16</sub> N <sub>3</sub>                                                                                                                                                   |
| <i>M<sub>r</sub></i>                                                                                                    | 365.21                                                                                                                                                                                             |
| Crystal system, space group                                                                                             | Monoclinic, <i>P2<sub>1</sub>/n</i>                                                                                                                                                                |
| Temperature (K)                                                                                                         | 93                                                                                                                                                                                                 |
| <i>a</i> , <i>b</i> , <i>c</i> (Å)                                                                                      | 8.6661 (2), 17.3479 (4), 9.7452 (2)                                                                                                                                                                |
| <i>b</i> (°)                                                                                                            | 101.367 (2)                                                                                                                                                                                        |
| <i>V</i> (Å <sup>3</sup> )                                                                                              | 1436.36 (6)                                                                                                                                                                                        |
| <i>Z</i>                                                                                                                | 4                                                                                                                                                                                                  |
| Radiation type                                                                                                          | Cu <i>K</i> $\alpha$                                                                                                                                                                               |
| <i>m</i> (mm <sup>-1</sup> )                                                                                            | 17.43                                                                                                                                                                                              |
| Crystal size (mm)                                                                                                       | 0.12 × 0.10 × 0.04                                                                                                                                                                                 |
| Data collection                                                                                                         |                                                                                                                                                                                                    |
| Diffractometer                                                                                                          | XtaLAB Pro: Kappa single                                                                                                                                                                           |
| Absorption correction                                                                                                   | Multi-scan<br><i>CrysAlis PRO</i> 1.171.39.20a (Rigaku Oxford Diffraction, 2015)<br>Empirical absorption correction using spherical harmonics,<br>implemented in SCALE3 ABSPACK scaling algorithm. |
| <i>T<sub>min</sub></i> , <i>T<sub>max</sub></i>                                                                         | 0.191, 1.000                                                                                                                                                                                       |
| No. of measured, independent and observed [ <i>I</i> > 2 <i>s</i> ( <i>I</i> )] reflections                             | 6664, 2807, 2713                                                                                                                                                                                   |
| <i>R<sub>int</sub></i>                                                                                                  | 0.034                                                                                                                                                                                              |
| ( <i>sin</i> <i>q</i> / <i>l</i> ) <sub>max</sub> (Å <sup>-1</sup> )                                                    | 0.623                                                                                                                                                                                              |
| Refinement                                                                                                              |                                                                                                                                                                                                    |
| <i>R</i> [ <i>F</i> <sup>2</sup> > 2 <i>s</i> ( <i>F</i> <sup>2</sup> )], <i>wR</i> ( <i>F</i> <sup>2</sup> ), <i>S</i> | 0.039, 0.107, 1.06                                                                                                                                                                                 |
| No. of reflections                                                                                                      | 2807                                                                                                                                                                                               |
| No. of parameters                                                                                                       | 174                                                                                                                                                                                                |
| H-atom treatment                                                                                                        | H-atom parameters constrained                                                                                                                                                                      |
| <i>D</i> $\rho$ <sub>max</sub> , <i>D</i> $\rho$ <sub>min</sub> (e Å <sup>-3</sup> )                                    | 1.00, -1.24                                                                                                                                                                                        |

Computer programs: *CrysAlis PRO* 1.171.39.20a (Rigaku OD, 2015), *SHELXS* (Sheldrick, 2008), *SHELXT* (Sheldrick, 2015), *SHELXL* (Sheldrick, 2015), *Olex2* (Dolomanov *et al.*, 2009).

Supplementary Table 3. Crystallographic experimental information of **1c·HI**

|                                                                                                                         |                                                                                                                                                                                                 |
|-------------------------------------------------------------------------------------------------------------------------|-------------------------------------------------------------------------------------------------------------------------------------------------------------------------------------------------|
| Crystal data                                                                                                            |                                                                                                                                                                                                 |
| Chemical formula                                                                                                        | I·C <sub>12</sub> H <sub>16</sub> N <sub>3</sub>                                                                                                                                                |
| <i>M</i> <sub>r</sub>                                                                                                   | 329.18                                                                                                                                                                                          |
| Crystal system, space group                                                                                             | Triclinic, <i>P</i> <sup>-</sup> 1                                                                                                                                                              |
| Temperature (K)                                                                                                         | 93                                                                                                                                                                                              |
| <i>a</i> , <i>b</i> , <i>c</i> (Å)                                                                                      | 8.24726 (18), 10.8066 (2), 15.3622 (3)                                                                                                                                                          |
| <i>α</i> , <i>β</i> , <i>γ</i> (°)                                                                                      | 79.4130 (17), 75.8478 (17), 84.8783 (18)                                                                                                                                                        |
| <i>V</i> (Å <sup>3</sup> )                                                                                              | 1303.58 (5)                                                                                                                                                                                     |
| <i>Z</i>                                                                                                                | 4                                                                                                                                                                                               |
| Radiation type                                                                                                          | Cu <i>Kα</i>                                                                                                                                                                                    |
| <i>m</i> (mm <sup>-1</sup> )                                                                                            | 19.12                                                                                                                                                                                           |
| Crystal size (mm)                                                                                                       | 0.06 × 0.05 × 0.05                                                                                                                                                                              |
| Data collection                                                                                                         |                                                                                                                                                                                                 |
| Diffractometer                                                                                                          | XtaLAB Pro: Kappa single                                                                                                                                                                        |
| Absorption correction                                                                                                   | Multi-scan<br><i>CrysAlis PRO</i> 1.171.39.20a (Rigaku Oxford Diffraction, 2015)<br>Empirical absorption correction using spherical harmonics, implemented in SCALE3 ABSPACK scaling algorithm. |
| <i>T</i> <sub>min</sub> , <i>T</i> <sub>max</sub>                                                                       | 0.516, 1.000                                                                                                                                                                                    |
| No. of measured, independent and observed [ <i>I</i> > 2 <i>s</i> ( <i>I</i> )] reflections                             | 13008, 5061, 4550                                                                                                                                                                               |
| <i>R</i> <sub>int</sub>                                                                                                 | 0.037                                                                                                                                                                                           |
| ( <i>sin q/l</i> ) <sub>max</sub> (Å <sup>-1</sup> )                                                                    | 0.622                                                                                                                                                                                           |
| Refinement                                                                                                              |                                                                                                                                                                                                 |
| <i>R</i> [ <i>F</i> <sup>2</sup> > 2 <i>s</i> ( <i>F</i> <sup>2</sup> )], <i>wR</i> ( <i>F</i> <sup>2</sup> ), <i>S</i> | 0.030, 0.082, 1.08                                                                                                                                                                              |
| No. of reflections                                                                                                      | 5061                                                                                                                                                                                            |
| No. of parameters                                                                                                       | 295                                                                                                                                                                                             |
| H-atom treatment                                                                                                        | H-atom parameters constrained                                                                                                                                                                   |
| <i>D</i> ρ <sub>max</sub> , <i>D</i> ρ <sub>min</sub> (e Å <sup>-3</sup> )                                              | 1.01, -1.07                                                                                                                                                                                     |

Computer programs: *CrysAlis PRO* 1.171.39.20a (Rigaku OD, 2015), *SHELXS* (Sheldrick, 2008), *SHELXT* (Sheldrick, 2015), *SHELXL* (Sheldrick, 2015), *Olex2* (Dolomanov *et al.*, 2009).



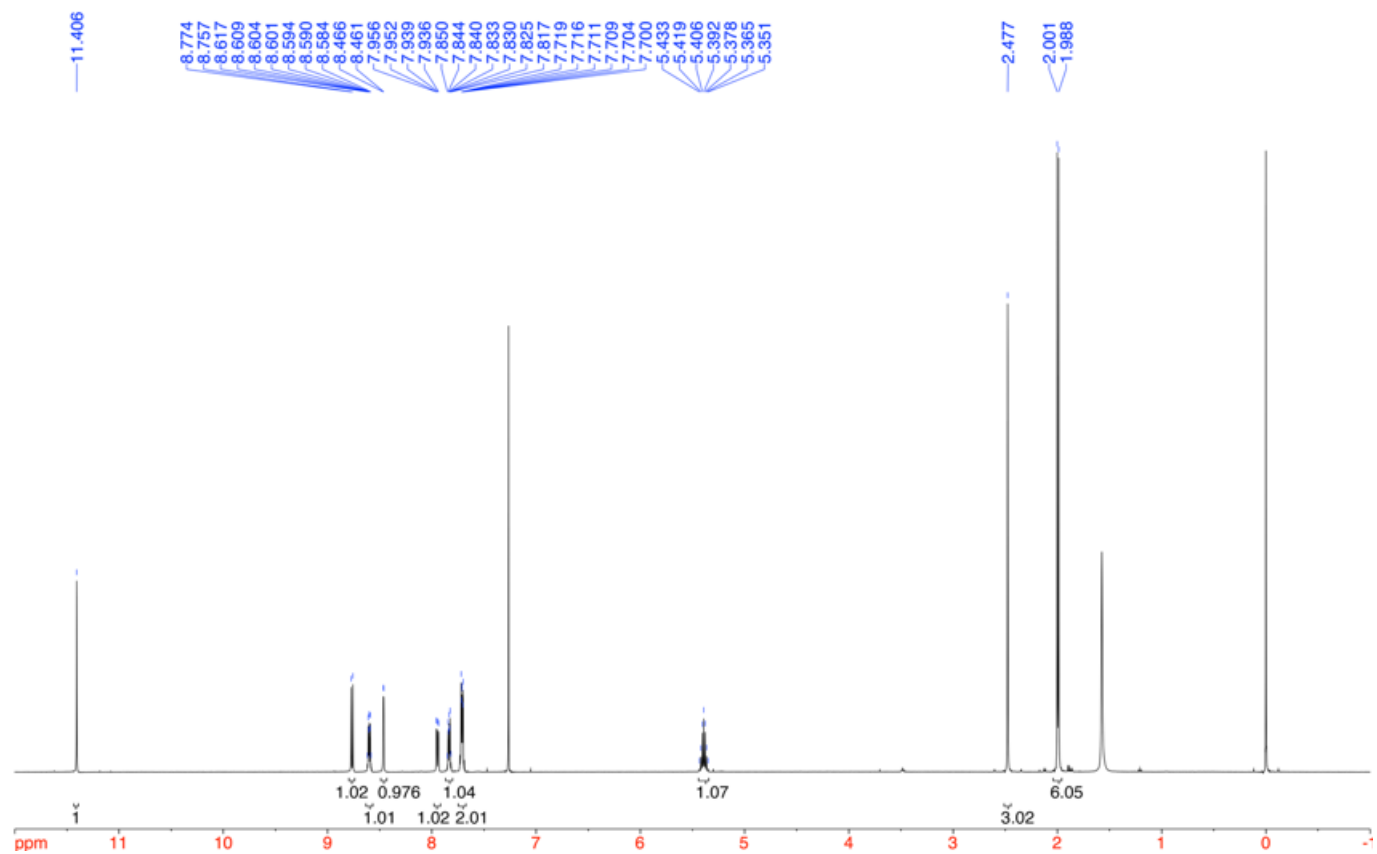

Supplementary Figure 2.  $^1\text{H}$  NMR spectrum of **1a**·HI (500 MHz,  $\text{CDCl}_3$ , 300 K)

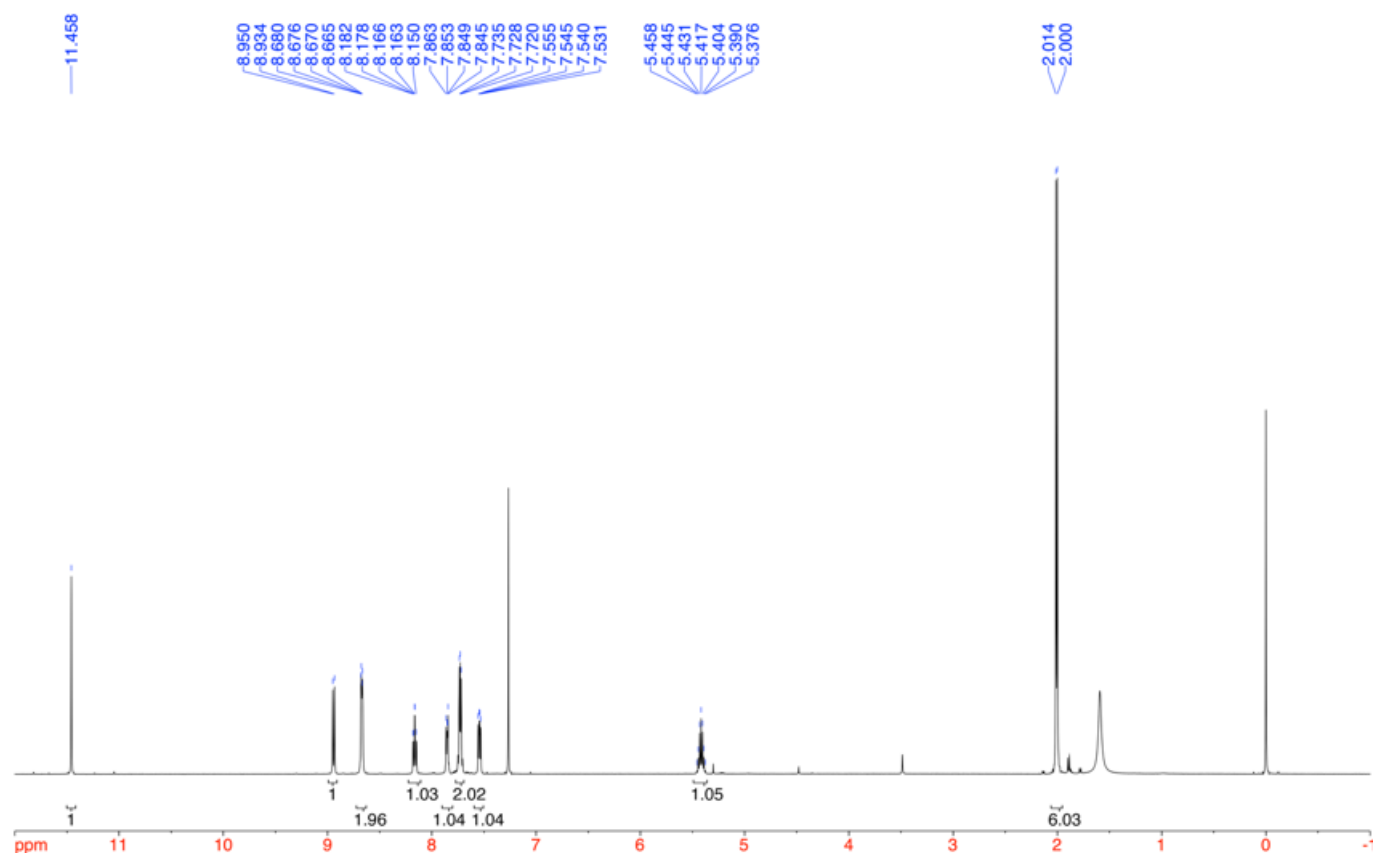

Supplementary Figure 3.  $^1\text{H}$  NMR spectrum of **1b**·HI (500 MHz,  $\text{CDCl}_3$ , 300 K)

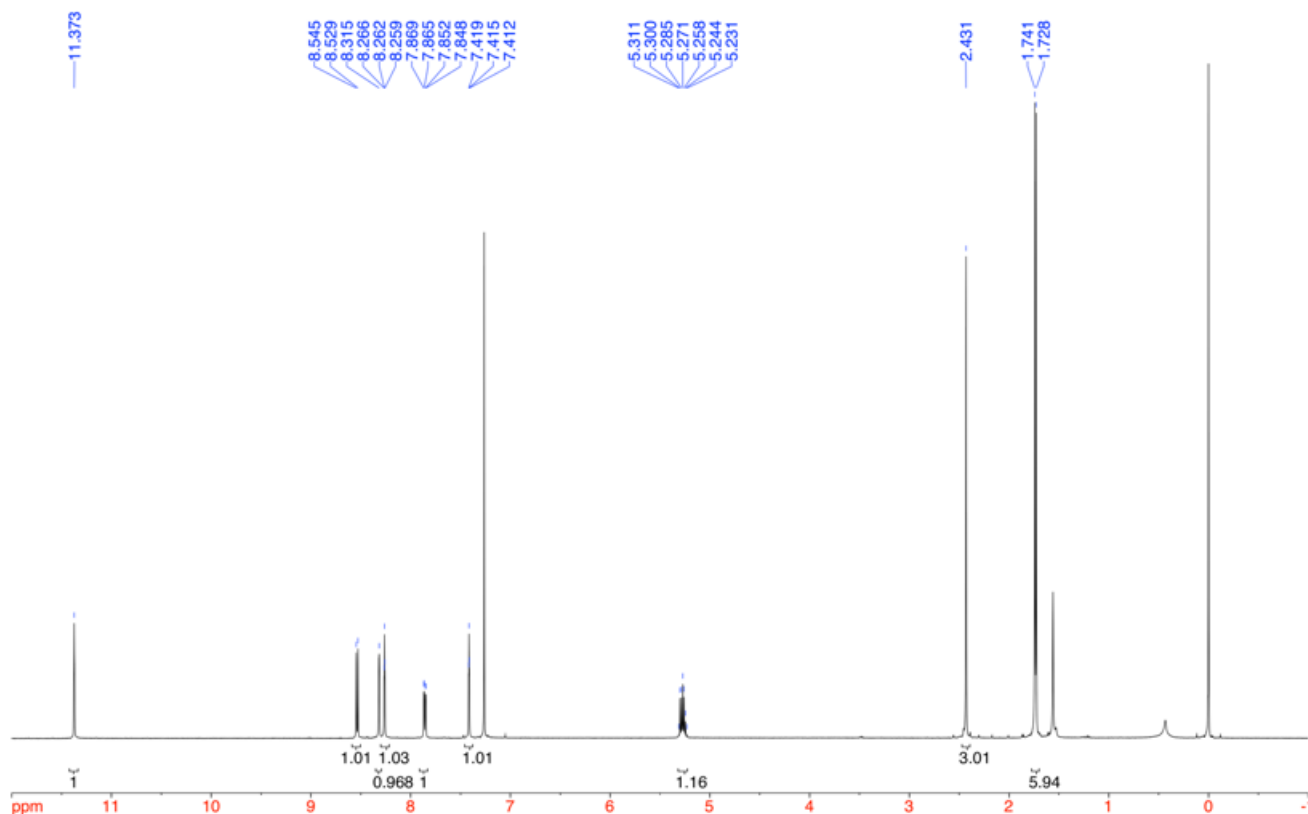

Supplementary Figure 4.  $^1\text{H}$  NMR spectrum of **1c**·HI (500 MHz,  $\text{CDCl}_3$ , 300 K)

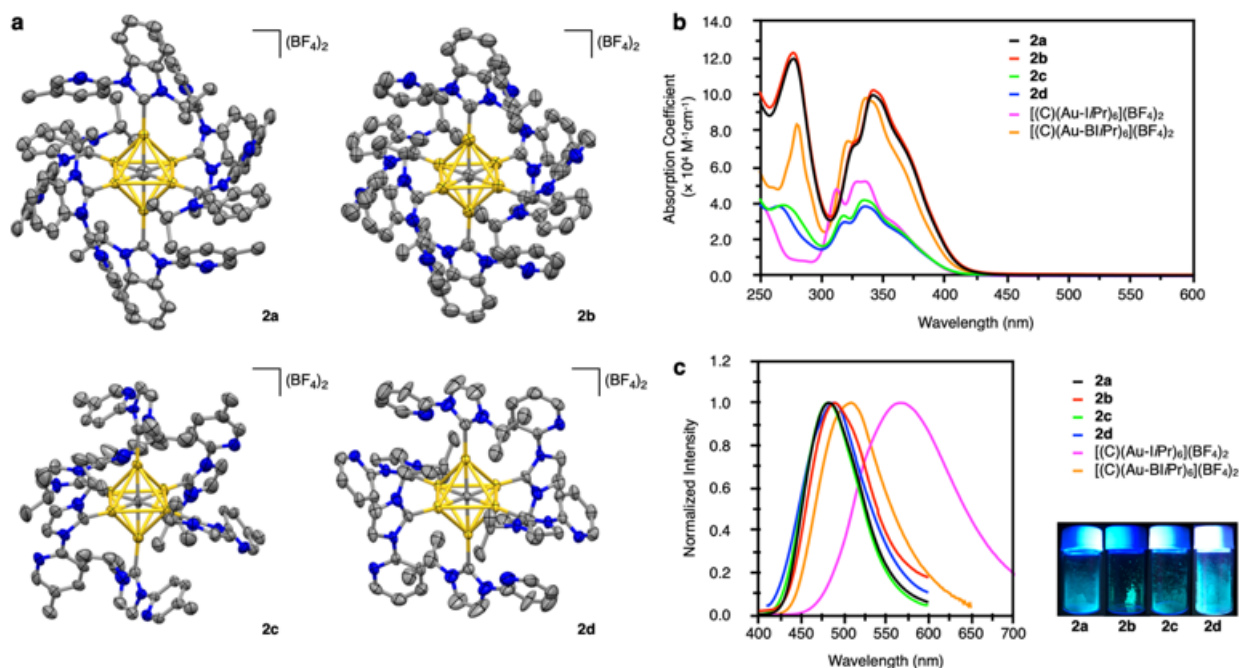

Supplementary Figure 5. Structures and photochemical properties of  $\text{CAu}_6$  clusters **2a-d**. **a**, X-ray crystal structures of **2a-d** (25% probability for **2a**, 50% probability for **2b-d**), with the anions  $\text{BF}_4^-$  simplified. **b**, UV-vis absorption spectra of **2a** ( $\epsilon_{342} = 1.0 \times 10^5 \text{ M}^{-1}\text{cm}^{-1}$ ), **2b** ( $\epsilon_{342} = 1.0 \times 10^5 \text{ M}^{-1}\text{cm}^{-1}$ ), **2c** ( $\epsilon_{335} = 4.2 \times 10^4 \text{ M}^{-1}\text{cm}^{-1}$ ), **2d** ( $\epsilon_{335} = 3.8 \times 10^4 \text{ M}^{-1}\text{cm}^{-1}$ ),  $[(\text{C})(\text{Au}^{\text{I}}\text{-IrPr})_6](\text{BF}_4)_2$  ( $\epsilon_{329} = 5.2 \times 10^4 \text{ M}^{-1}\text{cm}^{-1}$ ) and  $[(\text{C})(\text{Au}^{\text{I}}\text{-BiPr})_6](\text{BF}_4)_2$  ( $\epsilon_{336} = 1.0 \times 10^5 \text{ M}^{-1}\text{cm}^{-1}$ ) in  $\text{CH}_2\text{Cl}_2$  (293 K). **c**, Emission spectra of **2a-d**,  $[(\text{C})(\text{Au}^{\text{I}}\text{-IrPr})_6](\text{BF}_4)_2$  and  $[(\text{C})(\text{Au}^{\text{I}}\text{-BiPr})_6](\text{BF}_4)_2$  in the solid state at room temperature, with  $\lambda_{\text{em}}^{\text{max}}$  being 483, 490, 482, 488, 567 and 509 nm, respectively, and the corresponding emission photographs.

Supplementary Table 4. Crystallographic experimental information of **2a**

|                                                                                                                         |                                                                                                                                                                                                  |
|-------------------------------------------------------------------------------------------------------------------------|--------------------------------------------------------------------------------------------------------------------------------------------------------------------------------------------------|
| Crystal data                                                                                                            |                                                                                                                                                                                                  |
| Chemical formula                                                                                                        | 2(C <sub>48.5</sub> H <sub>51</sub> Au <sub>3</sub> N <sub>9</sub> )·0.667(B <sub>3</sub> F <sub>12</sub> )                                                                                      |
| <i>M</i> <sub>r</sub>                                                                                                   | 2875.38                                                                                                                                                                                          |
| Crystal system, space group                                                                                             | Trigonal, <i>P</i> <sup>−</sup> 3                                                                                                                                                                |
| Temperature (K)                                                                                                         | 93                                                                                                                                                                                               |
| <i>a</i> , <i>c</i> (Å)                                                                                                 | 15.1530 (6), 11.9705 (6)                                                                                                                                                                         |
| <i>V</i> (Å <sup>3</sup> )                                                                                              | 2380.3 (2)                                                                                                                                                                                       |
| <i>Z</i>                                                                                                                | 1                                                                                                                                                                                                |
| Radiation type                                                                                                          | Cu <i>K</i> α                                                                                                                                                                                    |
| <i>m</i> (mm <sup>−1</sup> )                                                                                            | 17.53                                                                                                                                                                                            |
| Crystal size (mm)                                                                                                       | 0.06 × 0.05 × 0.04                                                                                                                                                                               |
| Data collection                                                                                                         |                                                                                                                                                                                                  |
| Diffractometer                                                                                                          | XtaLAB AFC12 (RINC): Kappa single                                                                                                                                                                |
| Absorption correction                                                                                                   | Multi-scan<br><i>CrysAlis PRO</i> 1.171.41.104a (Rigaku Oxford Diffraction, 2021)<br>Empirical absorption correction using spherical harmonics, implemented in SCALE3 ABSPACK scaling algorithm. |
| <i>T</i> <sub>min</sub> , <i>T</i> <sub>max</sub>                                                                       | 0.675, 1.000                                                                                                                                                                                     |
| No. of measured, independent and observed [ <i>I</i> > 2 <i>s</i> ( <i>I</i> )] reflections                             | 11882, 3146, 2051                                                                                                                                                                                |
| <i>R</i> <sub>int</sub>                                                                                                 | 0.059                                                                                                                                                                                            |
| (sin <i>q</i> / <i>l</i> ) <sub>max</sub> (Å <sup>−1</sup> )                                                            | 0.622                                                                                                                                                                                            |
| Refinement                                                                                                              |                                                                                                                                                                                                  |
| <i>R</i> [ <i>F</i> <sup>2</sup> > 2 <i>s</i> ( <i>F</i> <sup>2</sup> )], <i>wR</i> ( <i>F</i> <sup>2</sup> ), <i>S</i> | 0.106, 0.247, 1.16                                                                                                                                                                               |
| No. of reflections                                                                                                      | 3146                                                                                                                                                                                             |
| No. of parameters                                                                                                       | 362                                                                                                                                                                                              |
| No. of restraints                                                                                                       | 299                                                                                                                                                                                              |
| H-atom treatment                                                                                                        | H-atom parameters constrained                                                                                                                                                                    |
|                                                                                                                         | $w = 1/[s^2(F_o^2) + (0.0413P)^2 + 35.0444P]$ where $P = (F_o^2 + 2F_c^2)/3$                                                                                                                     |
| <i>D</i> ρ <sub>max</sub> , <i>D</i> ρ <sub>min</sub> (e Å <sup>−3</sup> )                                              | 1.03, -1.33                                                                                                                                                                                      |

Computer programs: *CrysAlis PRO* 1.171.39.20a (Rigaku OD, 2015), *SHELXS* (Sheldrick, 2008), *SHELXT* (Sheldrick, 2015), *SHELXL* (Sheldrick, 2015), *Olex2* (Dolomanov *et al.*, 2009).

Supplementary Table 5. Crystallographic experimental information of **2b**

|                                                                                                                         |                                                                                                                                                                                                 |
|-------------------------------------------------------------------------------------------------------------------------|-------------------------------------------------------------------------------------------------------------------------------------------------------------------------------------------------|
| Crystal data                                                                                                            |                                                                                                                                                                                                 |
| Chemical formula                                                                                                        | 1(C <sub>91</sub> H <sub>90</sub> Au <sub>6</sub> N <sub>18</sub> )·0.333(C <sub>3</sub> Cl <sub>6</sub> )·0.667(B <sub>3</sub> F <sub>12</sub> )                                               |
| <i>M</i> <sub>r</sub>                                                                                                   | 2876.09                                                                                                                                                                                         |
| Crystal system, space group                                                                                             | Trigonal, <i>P</i> <sup>−</sup> 3                                                                                                                                                               |
| Temperature (K)                                                                                                         | 93                                                                                                                                                                                              |
| <i>a</i> , <i>c</i> (Å)                                                                                                 | 15.1513 (3), 11.9681 (3)                                                                                                                                                                        |
| <i>V</i> (Å <sup>3</sup> )                                                                                              | 2379.33 (11)                                                                                                                                                                                    |
| <i>Z</i>                                                                                                                | 1.0                                                                                                                                                                                             |
| Radiation type                                                                                                          | Cu <i>K</i> α                                                                                                                                                                                   |
| <i>m</i> (mm <sup>−1</sup> )                                                                                            | 18.05                                                                                                                                                                                           |
| Crystal size (mm)                                                                                                       | 0.08 × 0.05 × 0.05                                                                                                                                                                              |
| Data collection                                                                                                         |                                                                                                                                                                                                 |
| Diffractometer                                                                                                          | XtaLAB Pro: Kappa single                                                                                                                                                                        |
| Absorption correction                                                                                                   | Multi-scan<br><i>CrysAlis PRO</i> 1.171.39.20a (Rigaku Oxford Diffraction, 2015)<br>Empirical absorption correction using spherical harmonics, implemented in SCALE3 ABSPACK scaling algorithm. |
| <i>T</i> <sub>min</sub> , <i>T</i> <sub>max</sub>                                                                       | 0.634, 1.000                                                                                                                                                                                    |
| No. of measured, independent and observed [ <i>I</i> > 2 <i>s</i> ( <i>I</i> )] reflections                             | 7587, 3112, 2554                                                                                                                                                                                |
| <i>R</i> <sub>int</sub>                                                                                                 | 0.026                                                                                                                                                                                           |
| (sin <i>q</i> / <i>l</i> ) <sub>max</sub> (Å <sup>−1</sup> )                                                            | 0.622                                                                                                                                                                                           |
| Refinement                                                                                                              |                                                                                                                                                                                                 |
| <i>R</i> [ <i>F</i> <sup>2</sup> > 2 <i>s</i> ( <i>F</i> <sup>2</sup> )], <i>wR</i> ( <i>F</i> <sup>2</sup> ), <i>S</i> | 0.060, 0.184, 1.06                                                                                                                                                                              |
| No. of reflections                                                                                                      | 3112                                                                                                                                                                                            |
| No. of parameters                                                                                                       | 192                                                                                                                                                                                             |
| No. of restraints                                                                                                       | 20                                                                                                                                                                                              |
| H-atom treatment                                                                                                        | H-atom parameters constrained                                                                                                                                                                   |
| <i>D</i> ρ <sub>max</sub> , <i>D</i> ρ <sub>min</sub> (e Å <sup>−3</sup> )                                              | 3.02, -2.03                                                                                                                                                                                     |

Computer programs: *CrysAlis PRO* 1.171.39.20a (Rigaku OD, 2015), *SHELXS* (Sheldrick, 2008), *SHELXT* (Sheldrick, 2015), *SHELXL* (Sheldrick, 2015), *Olex2* (Dolomanov *et al.*, 2009).

Supplementary Table 6. Crystallographic experimental information of **2c**

|                                                                       |                                                                                                                                                                                                    |
|-----------------------------------------------------------------------|----------------------------------------------------------------------------------------------------------------------------------------------------------------------------------------------------|
| Crystal data                                                          |                                                                                                                                                                                                    |
| Chemical formula                                                      | $C_{73}H_{90}Au_6N_{18} \cdot 2(BF_4) \cdot 0.5(H_2O) \cdot 0.5(C_4H_{10}O)$                                                                                                                       |
| $M_r$                                                                 | 2621.11                                                                                                                                                                                            |
| Crystal system, space group                                           | Triclinic, $P\bar{1}$                                                                                                                                                                              |
| Temperature (K)                                                       | 93                                                                                                                                                                                                 |
| $a, b, c$ (Å)                                                         | 13.1365 (3), 16.8967 (3), 21.6891 (4)                                                                                                                                                              |
| $\alpha, \beta, \gamma$ (°)                                           | 92.2116 (15), 106.5329 (16), 106.6179 (17)                                                                                                                                                         |
| $V$ (Å <sup>3</sup> )                                                 | 4384.50 (15)                                                                                                                                                                                       |
| $Z$                                                                   | 2                                                                                                                                                                                                  |
| Radiation type                                                        | Cu $K\alpha$                                                                                                                                                                                       |
| $\mu$ (mm <sup>-1</sup> )                                             | 18.96                                                                                                                                                                                              |
| Crystal size (mm)                                                     | 0.05 × 0.02 × 0.02                                                                                                                                                                                 |
| Data collection                                                       |                                                                                                                                                                                                    |
| Diffractometer                                                        | XtaLAB Pro: Kappa single                                                                                                                                                                           |
| Absorption correction                                                 | Multi-scan<br><i>CrysAlis PRO</i> 1.171.39.20a (Rigaku Oxford Diffraction, 2015)<br>Empirical absorption correction using spherical harmonics,<br>implemented in SCALE3 ABSPACK scaling algorithm. |
| $T_{min}, T_{max}$                                                    | 0.547, 1.000                                                                                                                                                                                       |
| No. of measured, independent and observed [ $I > 2s(I)$ ] reflections | 49093, 17116, 12242                                                                                                                                                                                |
| $R_{int}$                                                             | 0.066                                                                                                                                                                                              |
| $(\sin \theta)_{max}$ (Å <sup>-1</sup> )                              | 0.622                                                                                                                                                                                              |
| Refinement                                                            |                                                                                                                                                                                                    |
| $R[F^2 > 2s(F^2)], wR(F^2), S$                                        | 0.070, 0.204, 1.07                                                                                                                                                                                 |
| No. of reflections                                                    | 17116                                                                                                                                                                                              |
| No. of parameters                                                     | 924                                                                                                                                                                                                |
| No. of restraints                                                     | 374                                                                                                                                                                                                |
| H-atom treatment                                                      | H-atom parameters constrained                                                                                                                                                                      |
|                                                                       | $w = 1/[s^2(F_o^2) + (0.0974P)^2 + 39.4709P]$ where $P = (F_o^2 + 2F_c^2)/3$                                                                                                                       |
| $D\rho_{max}, D\rho_{min}$ (e Å <sup>-3</sup> )                       | 3.33, -2.60                                                                                                                                                                                        |

Computer programs: *CrysAlis PRO* 1.171.39.20a (Rigaku OD, 2015), *SHELXS* (Sheldrick, 2008), *SHELXT* (Sheldrick, 2015), *SHELXL* (Sheldrick, 2015), *Olex2* (Dolomanov *et al.*, 2009).

Supplementary Table 7. Crystallographic experimental information of **2d**

|                                                                       |                                                                                                                                                                                                        |
|-----------------------------------------------------------------------|--------------------------------------------------------------------------------------------------------------------------------------------------------------------------------------------------------|
| Crystal data                                                          |                                                                                                                                                                                                        |
| Chemical formula                                                      | $C_{67}H_{78}Au_6N_{18} \cdot 2(CH_2Cl_2) \cdot 2(BF_4) \cdot 2(O)$                                                                                                                                    |
| $M_r$                                                                 | 2696.77                                                                                                                                                                                                |
| Crystal system, space group                                           | Triclinic, $P\bar{1}$                                                                                                                                                                                  |
| Temperature (K)                                                       | 93                                                                                                                                                                                                     |
| $a, b, c$ (Å)                                                         | 12.0104 (3), 13.19365 (18), 13.9328 (3)                                                                                                                                                                |
| $\alpha, \beta, \gamma$ (°)                                           | 100.3398 (14), 106.4056 (19), 93.0798 (14)                                                                                                                                                             |
| $V$ (Å <sup>3</sup> )                                                 | 2070.73 (7)                                                                                                                                                                                            |
| $Z$                                                                   | 1                                                                                                                                                                                                      |
| Radiation type                                                        | Cu $K\alpha$                                                                                                                                                                                           |
| $\mu$ (mm <sup>-1</sup> )                                             | 21.27                                                                                                                                                                                                  |
| Crystal size (mm)                                                     | 0.04 × 0.04 × 0.04                                                                                                                                                                                     |
| Data collection                                                       |                                                                                                                                                                                                        |
| Diffractometer                                                        | XtaLAB Pro: Kappa single                                                                                                                                                                               |
| Absorption correction                                                 | Multi-scan <sup>[SHELXL]</sup> CrysAlis PRO 1.171.39.20a (Rigaku Oxford Diffraction, 2015) Empirical absorption correction using spherical harmonics, implemented in SCALE3 ABSPACK scaling algorithm. |
| $T_{min}, T_{max}$                                                    | 0.445, 1.000                                                                                                                                                                                           |
| No. of measured, independent and observed [ $I > 2s(I)$ ] reflections | 21590, 8054, 7333                                                                                                                                                                                      |
| $R_{int}$                                                             | 0.038                                                                                                                                                                                                  |
| $(\sin \theta/\lambda)_{max}$ (Å <sup>-1</sup> )                      | 0.621                                                                                                                                                                                                  |
| Refinement                                                            |                                                                                                                                                                                                        |
| $R[F^2 > 2s(F^2)], wR(F^2), S$                                        | 0.043, 0.118, 1.04                                                                                                                                                                                     |
| No. of reflections                                                    | 8054                                                                                                                                                                                                   |
| No. of parameters                                                     | 538                                                                                                                                                                                                    |
| No. of restraints                                                     | 132                                                                                                                                                                                                    |
| H-atom treatment                                                      | H-atom parameters constrained                                                                                                                                                                          |
|                                                                       | $w = 1/[s^2(F_o^2) + (0.0661P)^2 + 11.8156P]$ where $P = (F_o^2 + 2F_c^2)/3$                                                                                                                           |
| $D\rho_{max}, D\rho_{min}$ (e Å <sup>-3</sup> )                       | 1.84, -1.68                                                                                                                                                                                            |

Computer programs: *CrysAlis PRO* 1.171.39.20a (Rigaku OD, 2015), *SHELXS* (Sheldrick, 2008), *SHELXT* (Sheldrick, 2015), *SHELXL* (Sheldrick, 2015), *Olex2* (Dolomanov *et al.*, 2009).

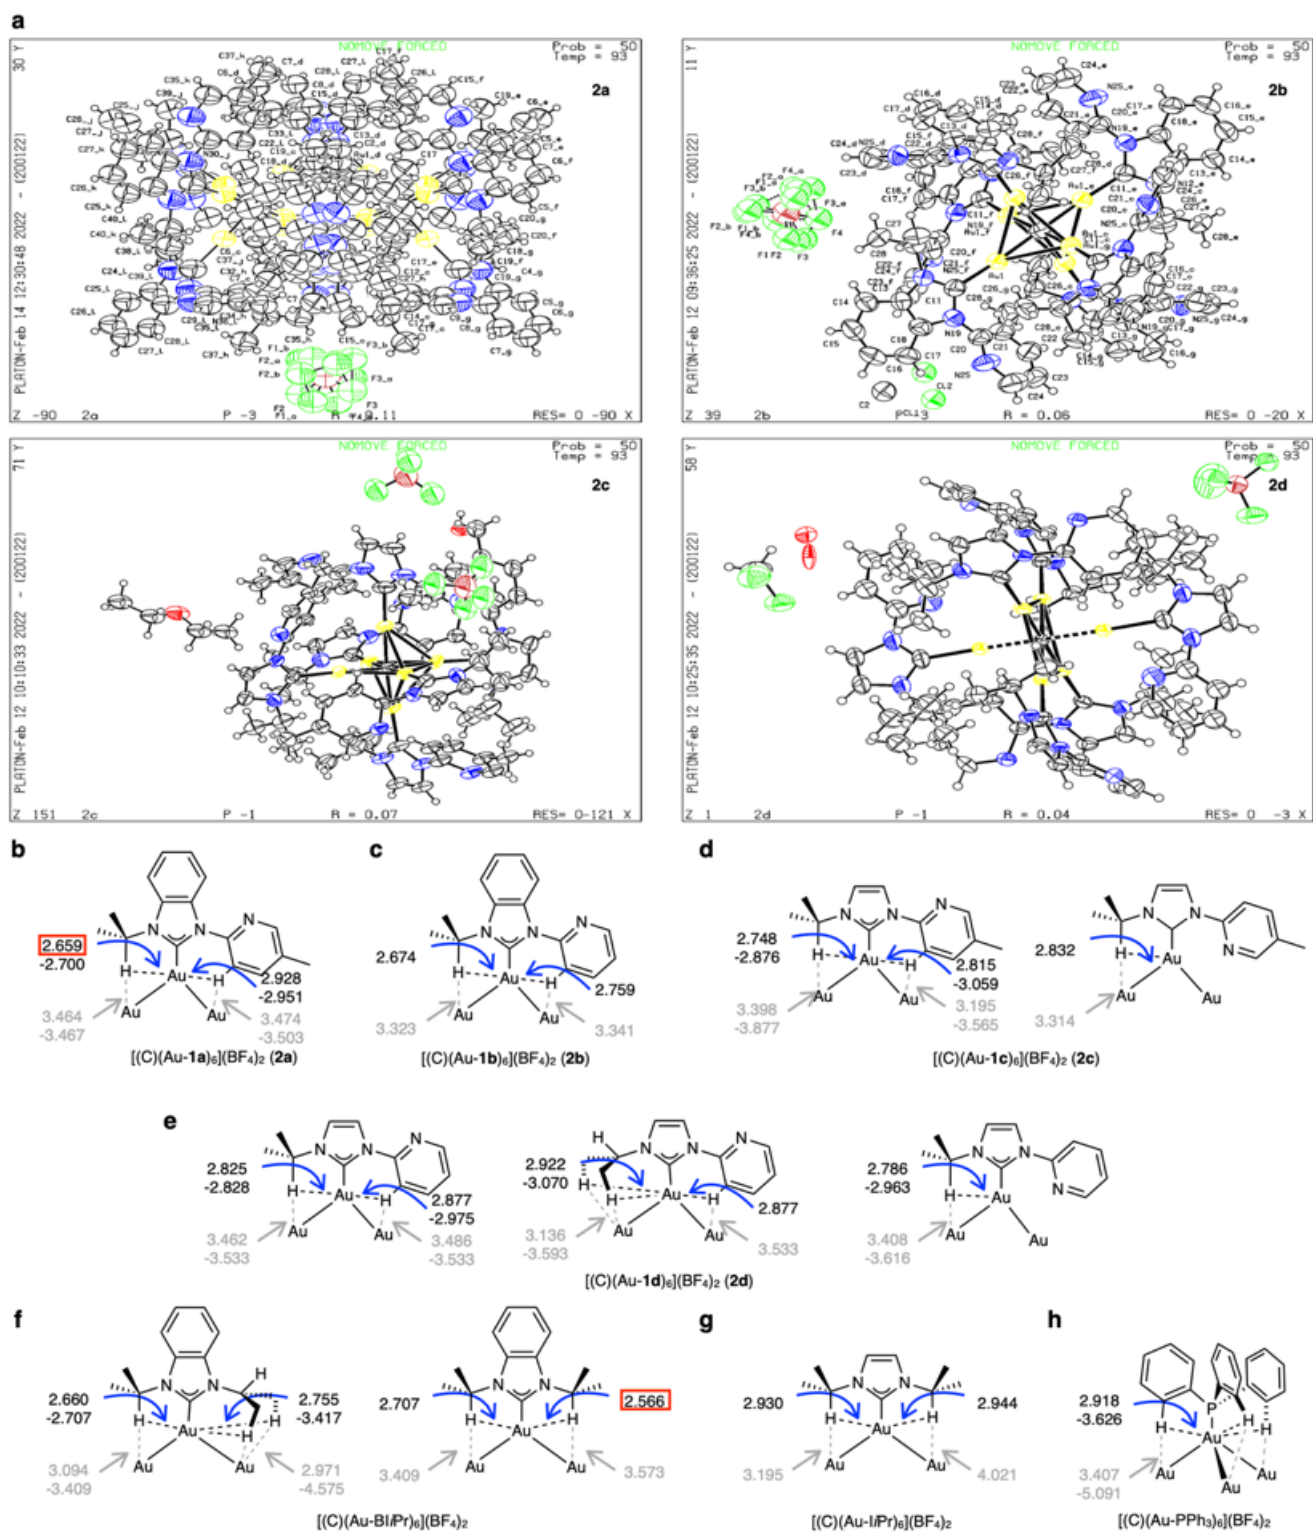

Supplementary Figure 6. ORTEP-style illustration of **2a** (CCDC 2103972), **2b** (CCDC 2103973), **2c** (CCDC 2103974) and **2d** (CCDC 2103975), and schematic illustration of intramolecular C–H···Au interactions in CAu<sub>6</sub> clusters<sup>7,8,26</sup>

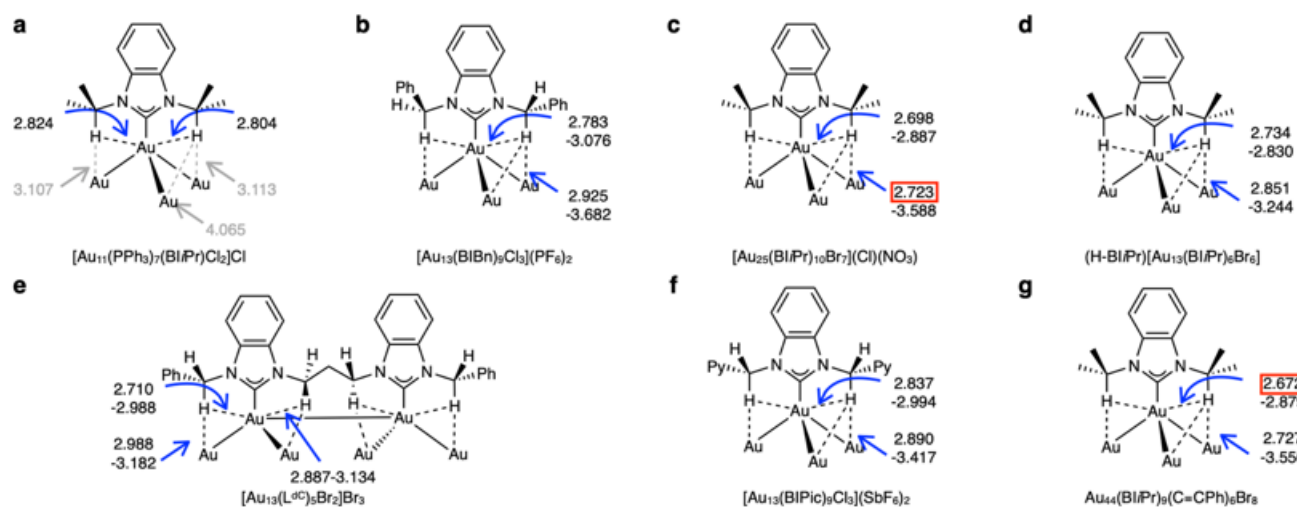

Supplementary Fig. 7. Schematic illustration of intramolecular C–H···Au interactions in Au nanoclusters ( $\text{\AA}$ )<sup>27–31</sup>

Supplementary Table 8. Key structural parameters of **2a–d** and some reported CAu<sup>I</sup><sub>6</sub> clusters (\*Corresponds to Au–P distances for [(C)(Au<sup>I</sup>-PPh<sub>3</sub>)<sub>6</sub>](BF<sub>4</sub>)<sub>2</sub>)

|                                                                                        | Au–C<br>(central C <sup>4+</sup> , $\text{\AA}$ ) | Au–Au ( $\text{\AA}$ )     | Au–C<br>(NHC ligands, $\text{\AA}$ )* |
|----------------------------------------------------------------------------------------|---------------------------------------------------|----------------------------|---------------------------------------|
| <b>2a</b>                                                                              | 2.1093 (15)<br>– 2.11095 (15)                     | 2.962 (2)<br>– 3.004 (3)   | 2.05 (3)                              |
| <b>2b</b>                                                                              | 2.1164 (4)                                        | 2.9807 (7)<br>– 3.0055 (8) | 2.046 (11)                            |
| <b>2c</b>                                                                              | 2.070 (12)<br>– 2.145 (12)                        | 2.9180 (7)<br>– 3.0427 (7) | 1.998 (6)<br>– 2.029 (15)             |
| <b>2d</b>                                                                              | 2.1101 (3)<br>– 2.1166 (3)                        | 2.9410 (4)<br>– 3.0412 (4) | 2.024 (8)<br>– 2.043 (8)              |
| [(C)(Au- <i>I</i> iPr) <sub>6</sub> ](BF <sub>4</sub> ) <sub>2</sub> <sup>8</sup>      | 2.1158 (3)                                        | 2.9282 (4)<br>– 3.0548 (3) | 2.020(5)                              |
| [(C)(Au- <i>B</i> iPr) <sub>6</sub> ](BF <sub>4</sub> ) <sub>2</sub> <sup>7</sup>      | 2.1142 (2)<br>– 2.11580 (18)                      | 2.9529 (3)<br>– 3.0280 (3) | 2.026 (5)<br>– 2.038 (5)              |
| [(C)(Au-PPh <sub>3</sub> ) <sub>6</sub> ](BF <sub>4</sub> ) <sub>2</sub> <sup>26</sup> | 2.09 (1)<br>– 2.15 (1)                            | 2.887 (1)<br>– 3.226 (1)   | 2.254 (4)<br>– 2.277 (4)              |



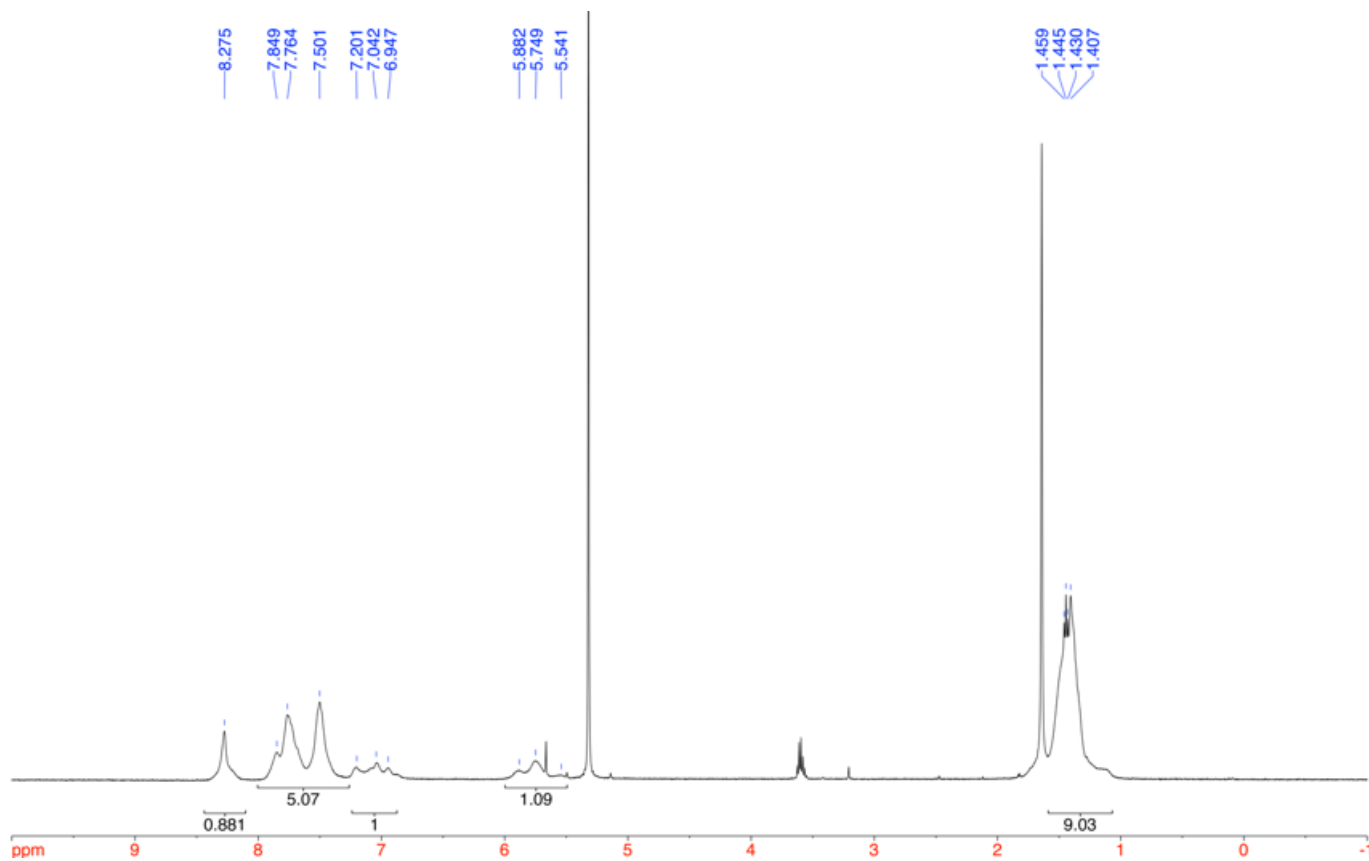

Supplementary Figure 8.  $^1\text{H}$  NMR spectrum of **2a** (500 MHz,  $\text{CD}_2\text{Cl}_2$ , 300 K)

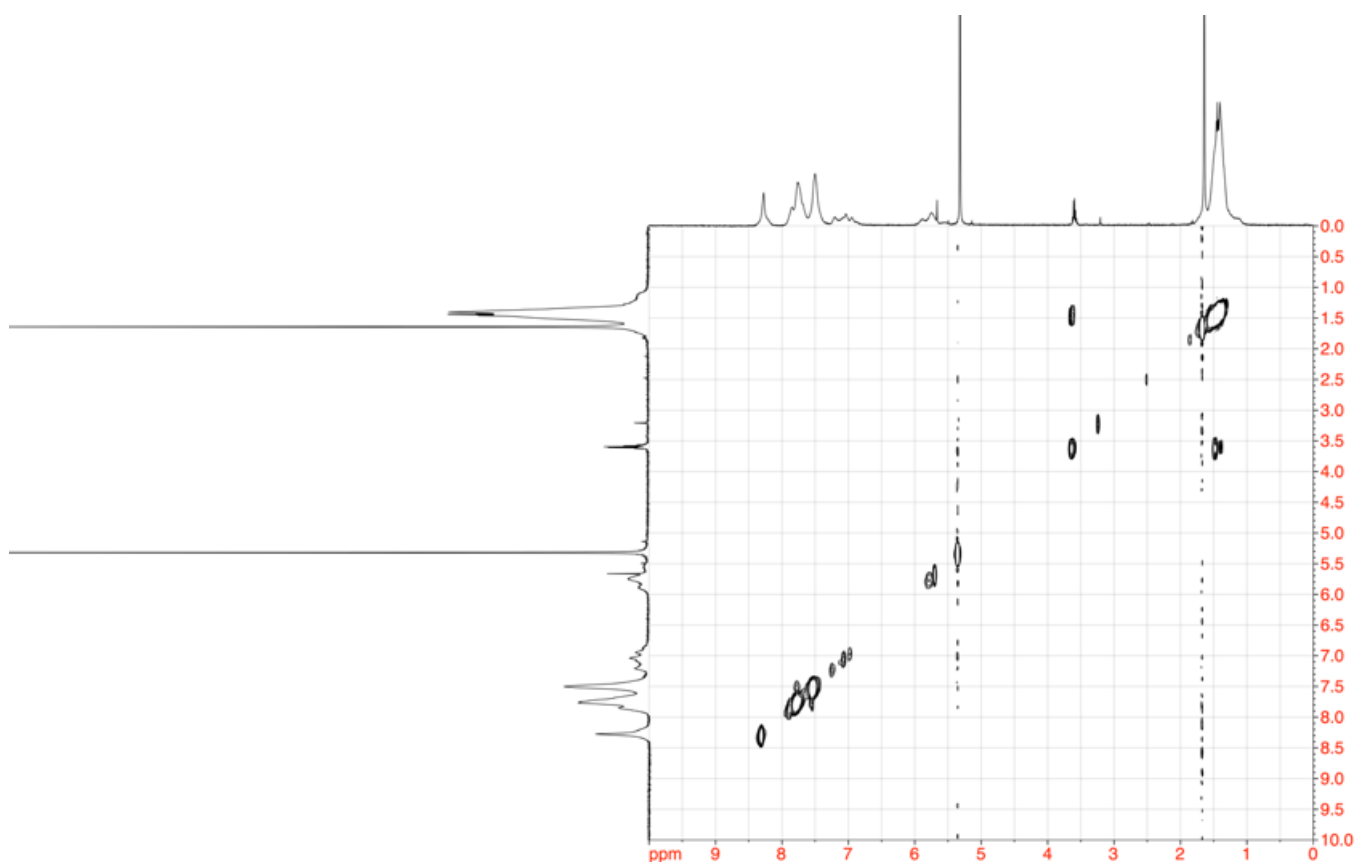

Supplementary Figure 9.  $^1\text{H}$ - $^1\text{H}$  COSY NMR spectrum of **2a** (500 MHz,  $\text{CD}_2\text{Cl}_2$ , 300 K)

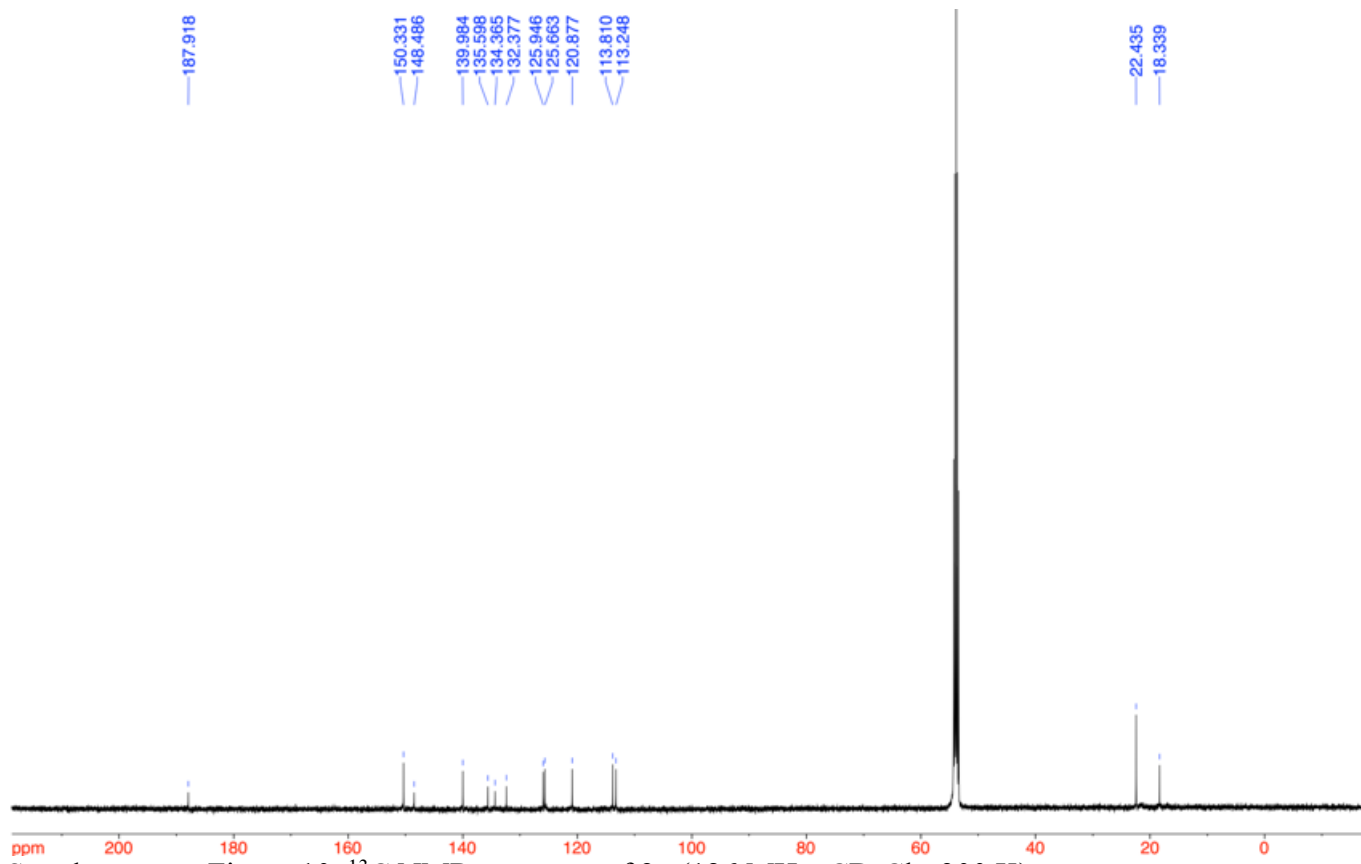

Supplementary Figure 10.  $^{13}\text{C}$  NMR spectrum of **2a** (126 MHz,  $\text{CD}_2\text{Cl}_2$ , 300 K)

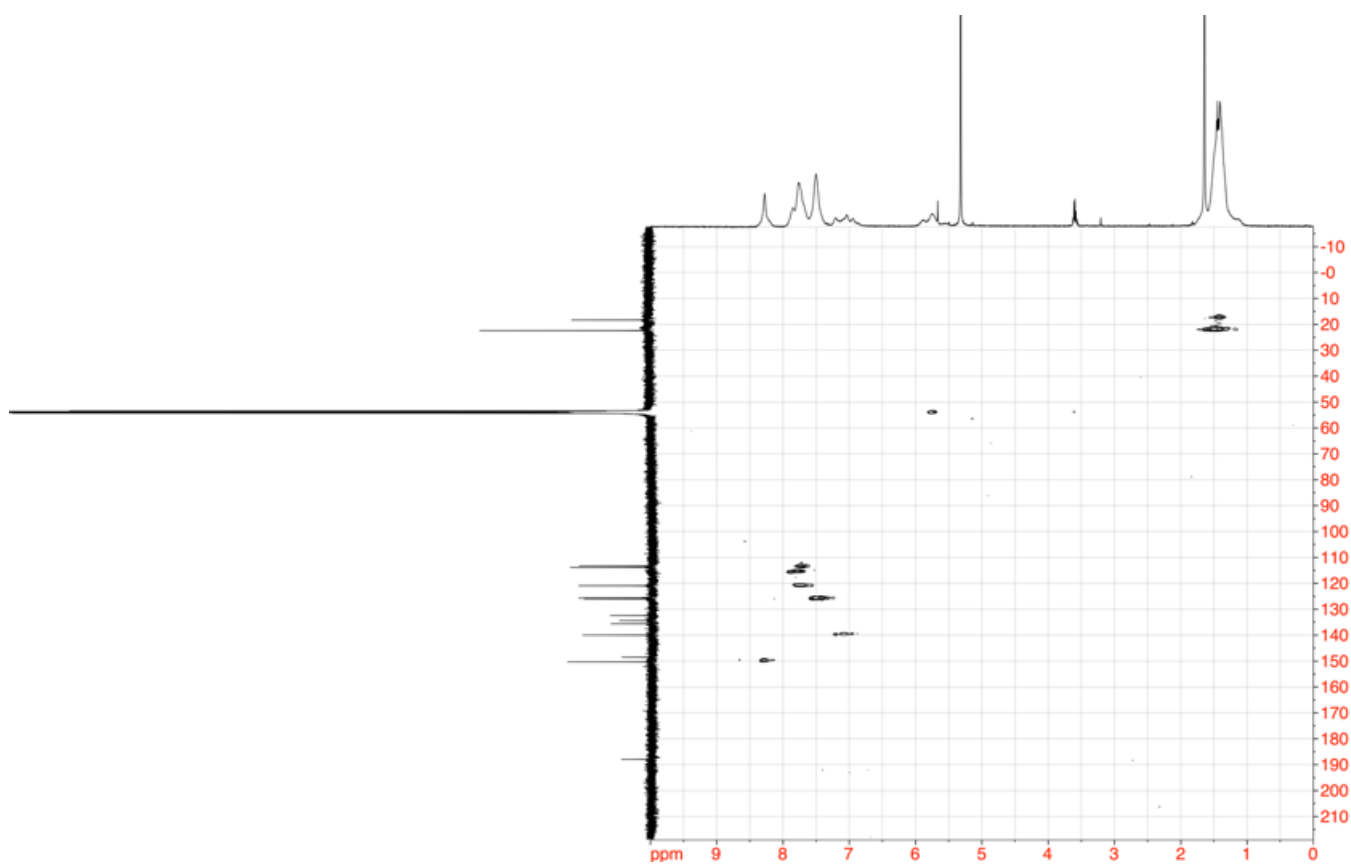

Supplementary Figure 11.  $^1\text{H}$ - $^{13}\text{C}$  HSQC spectrum of **2a** ( $\text{CD}_2\text{Cl}_2$ , 300 K)

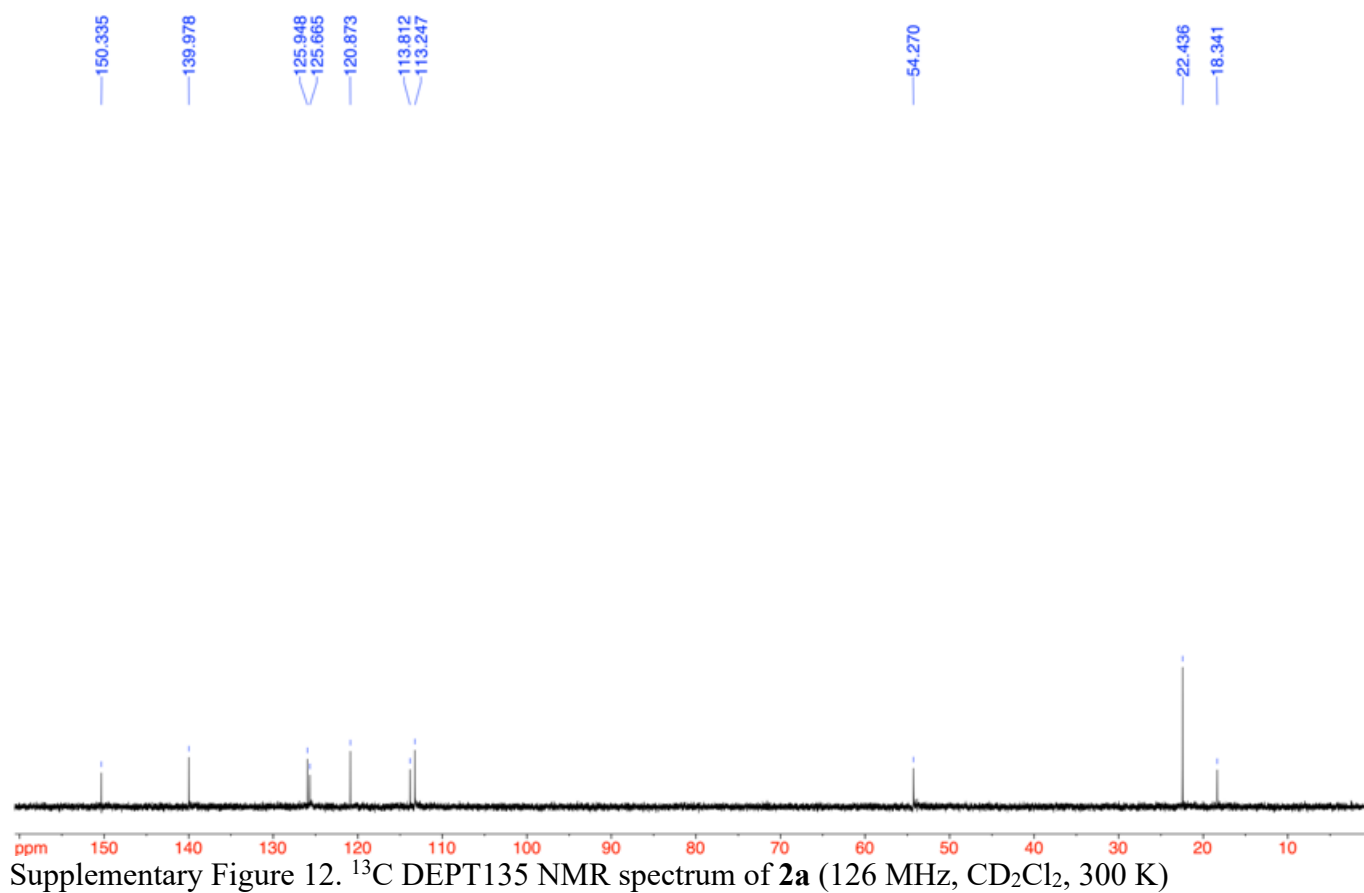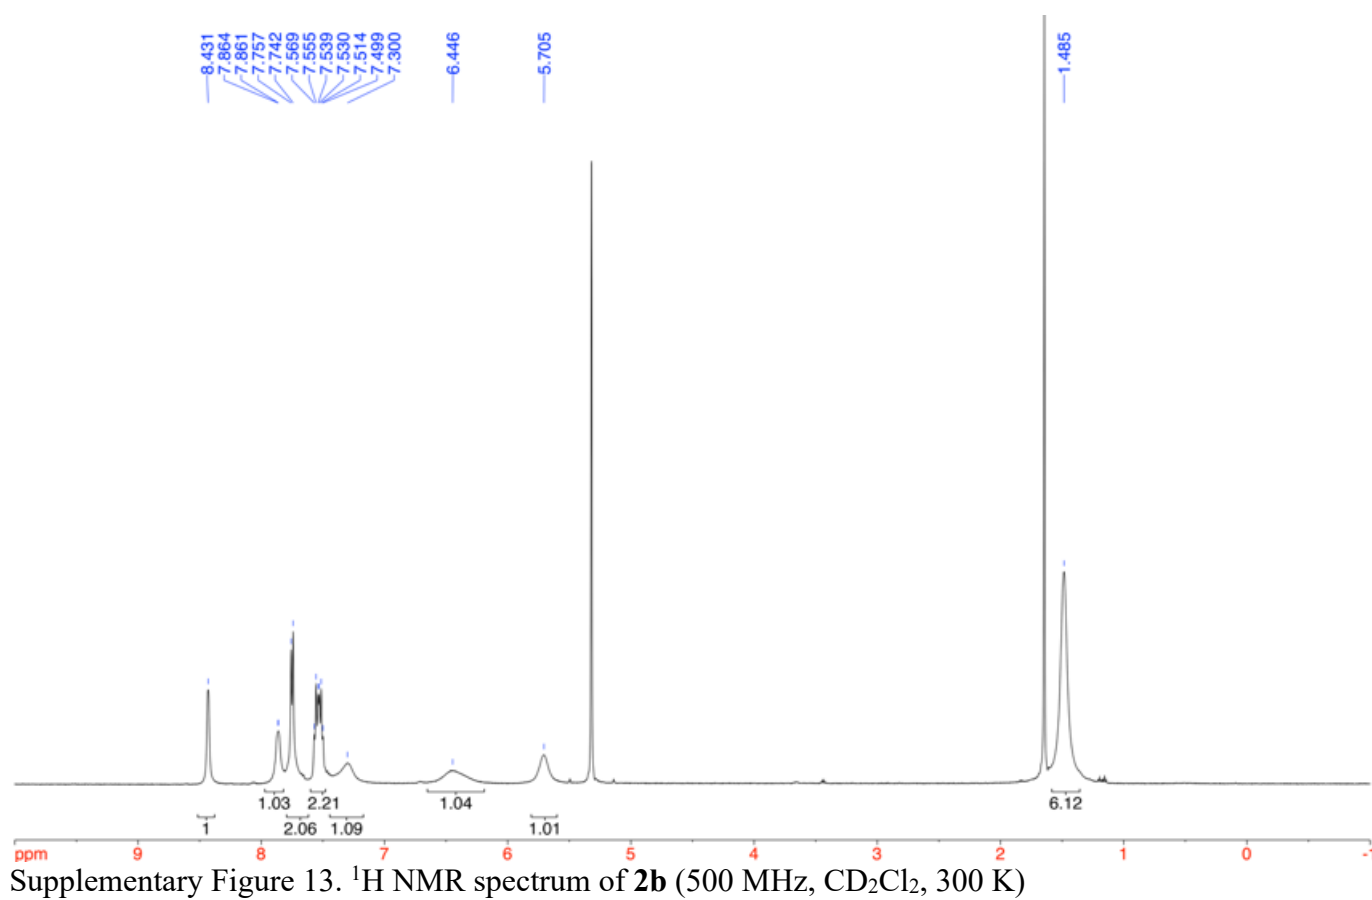

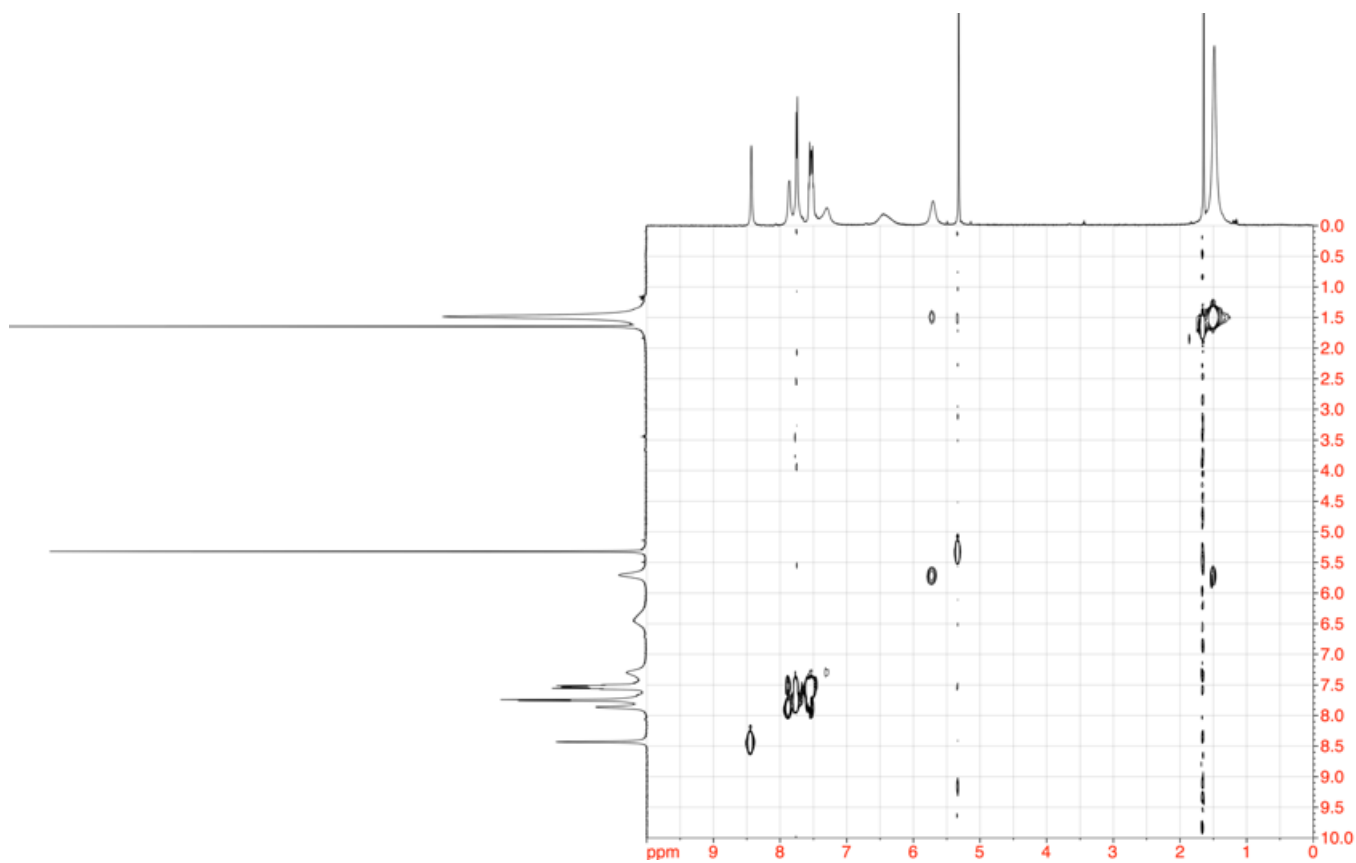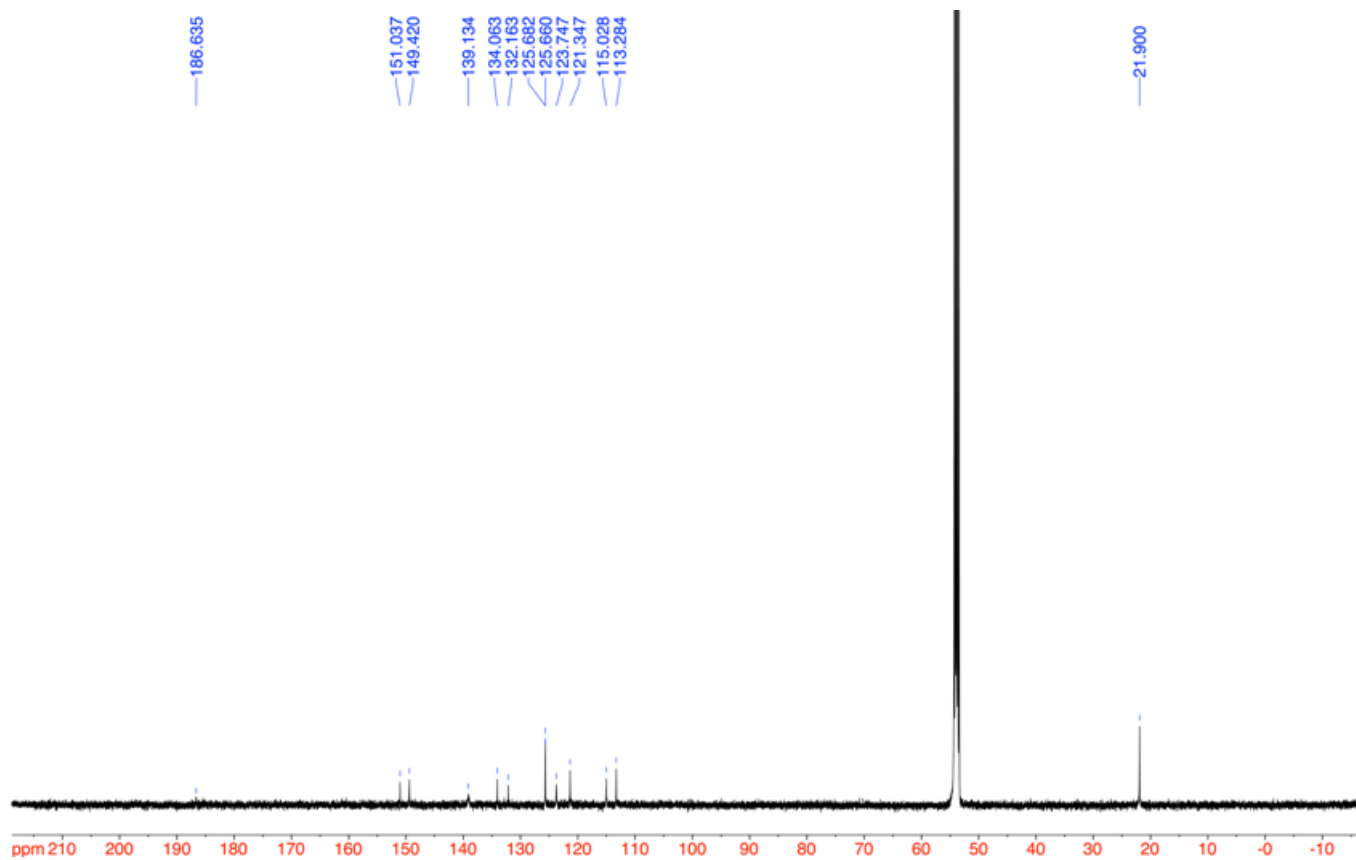

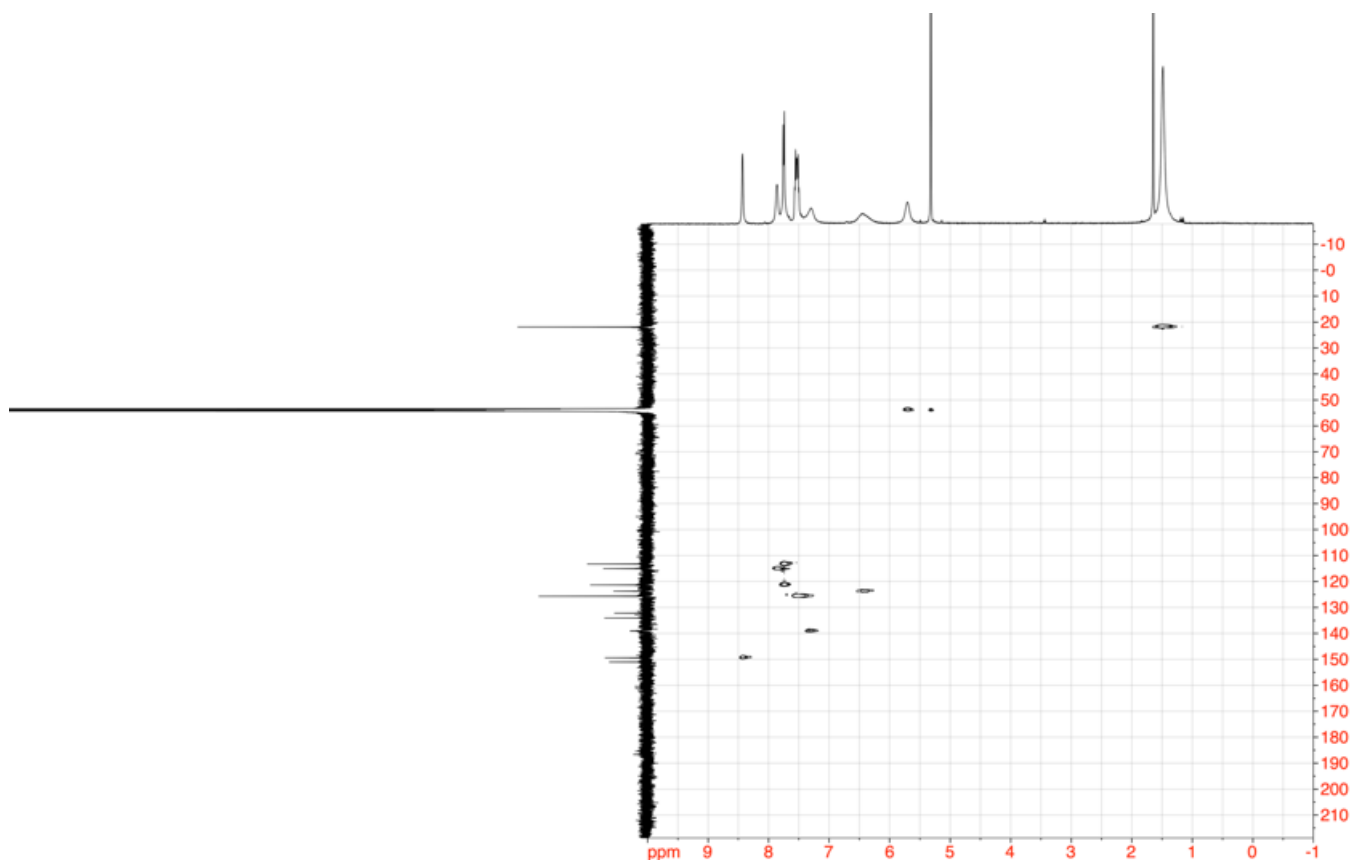

Supplementary Figure 16.  $^1\text{H}$ - $^{13}\text{C}$  HSQC spectrum of **2b** ( $\text{CD}_2\text{Cl}_2$ , 300 K)

- 149.437
- 139.173
- 125.711
- 125.678
- 123.871
- 121.384
- 115.072
- 113.266
- 53.941
- 21.892

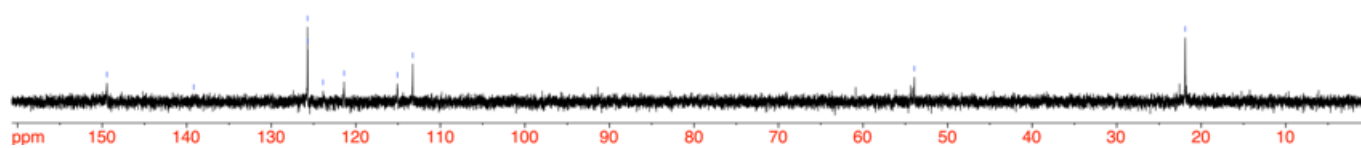

Supplementary Figure 17.  $^{13}\text{C}$  DEPT135 NMR spectrum of **2b** (126 MHz,  $\text{CD}_2\text{Cl}_2$ , 300 K)

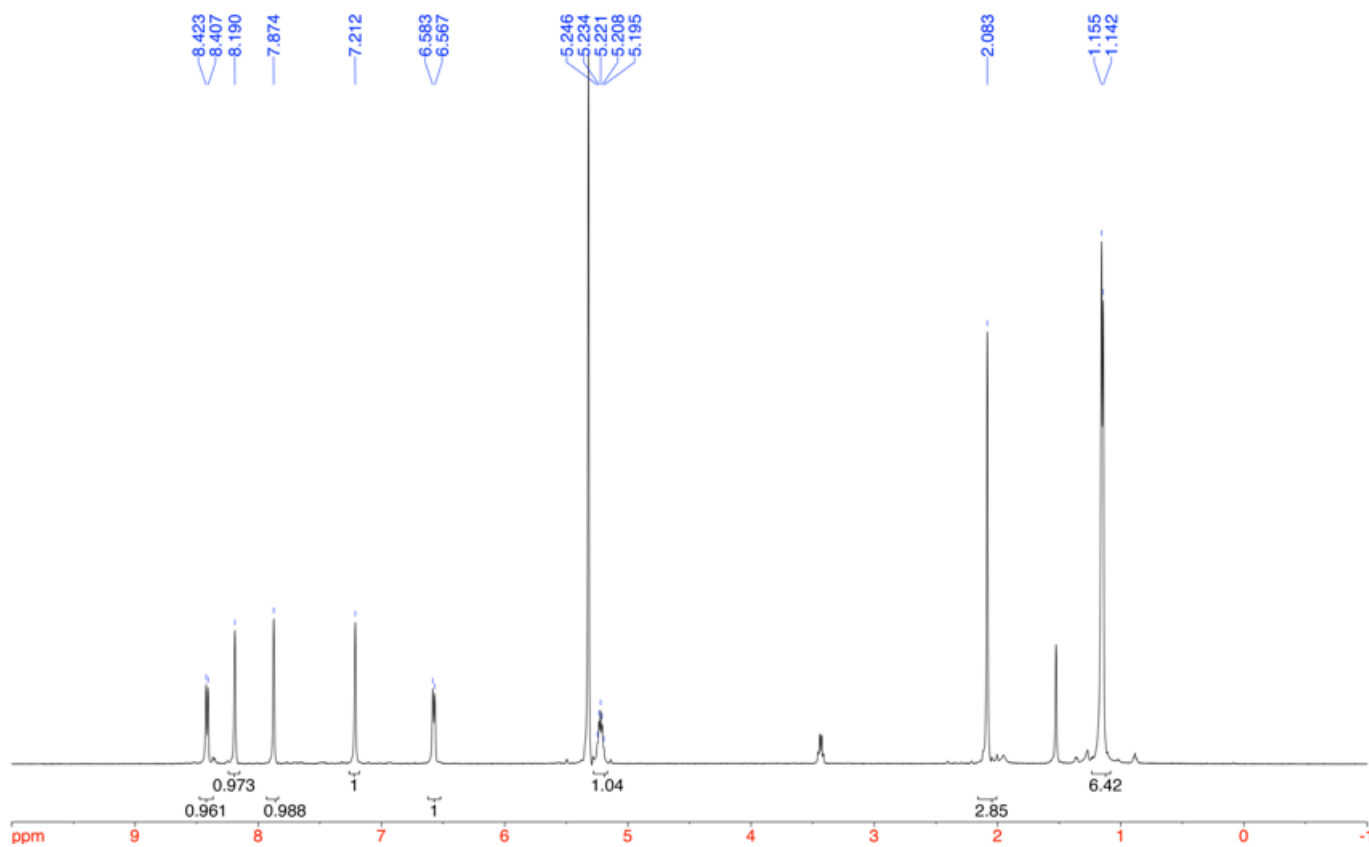

Supplementary Figure 18.  $^1\text{H}$  NMR spectrum of **2c** (500 MHz,  $\text{CD}_2\text{Cl}_2$ , 300 K)

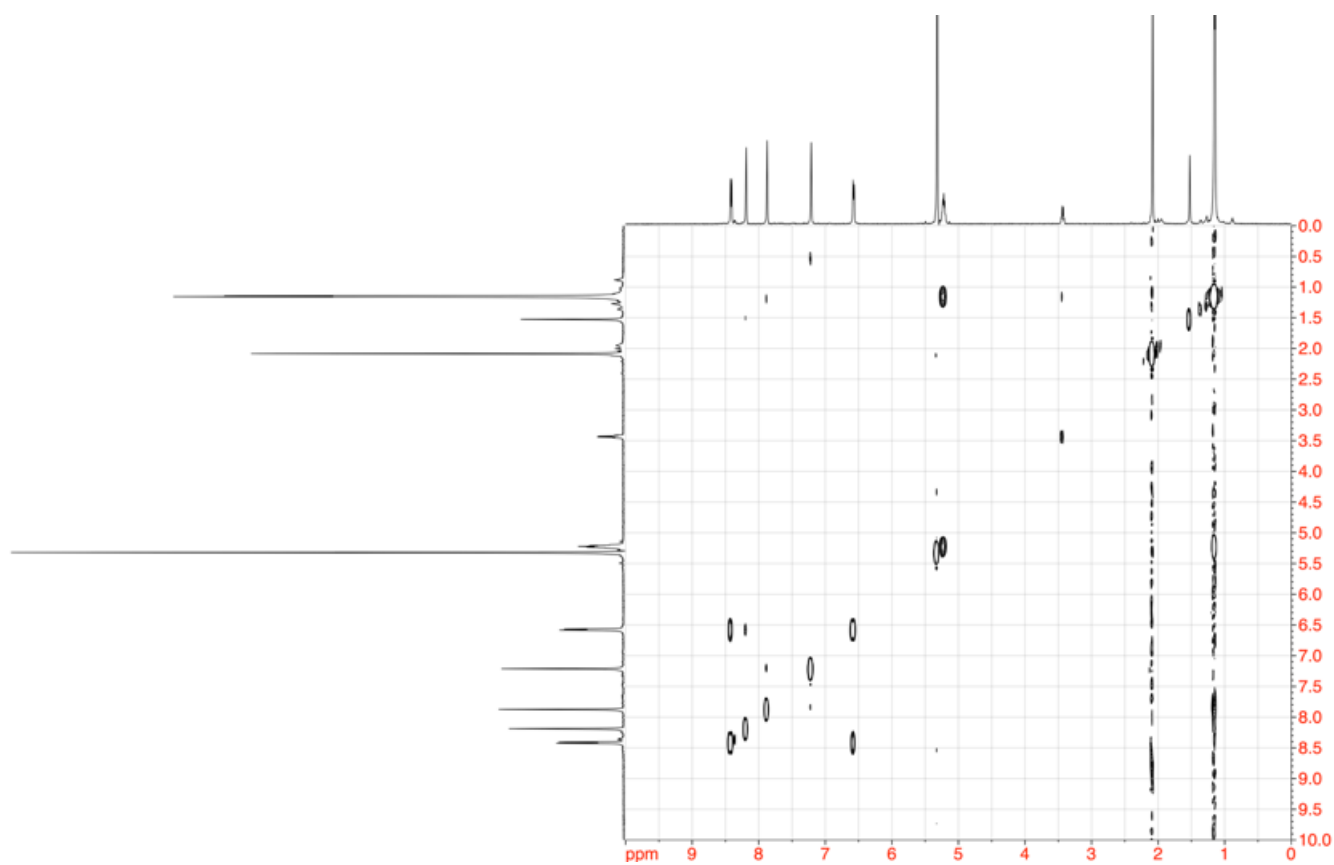

Supplementary Figure 19.  $^1\text{H}$ - $^1\text{H}$  COSY NMR spectrum of **2c** (500 MHz,  $\text{CD}_2\text{Cl}_2$ , 300 K)

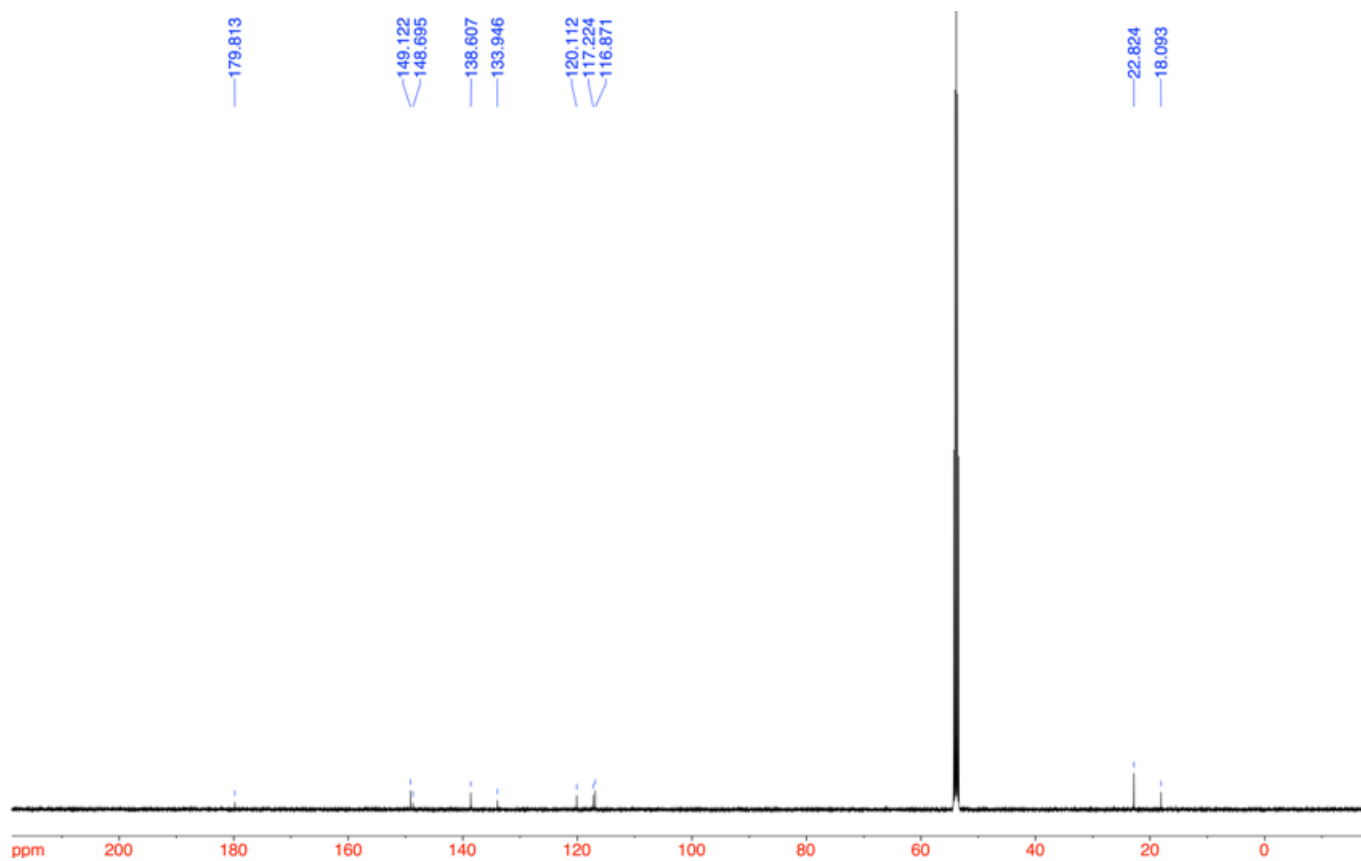

Supplementary Figure 20.  $^{13}\text{C}$  NMR spectrum of **2c** (126 MHz,  $\text{CD}_2\text{Cl}_2$ , 300 K)

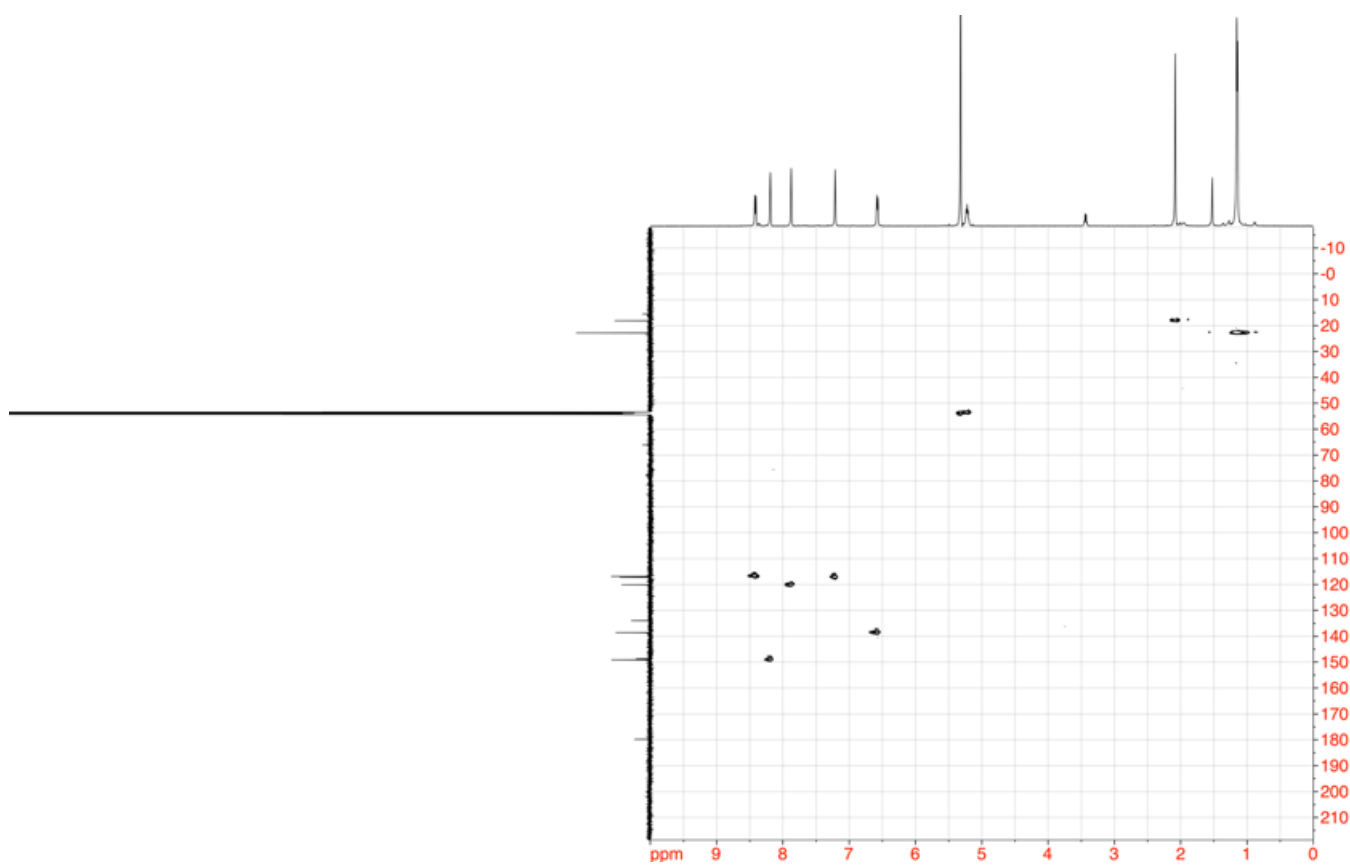

Supplementary Figure 21.  $^1\text{H}$ - $^{13}\text{C}$  HSQC spectrum of **2c** ( $\text{CD}_2\text{Cl}_2$ , 300 K)

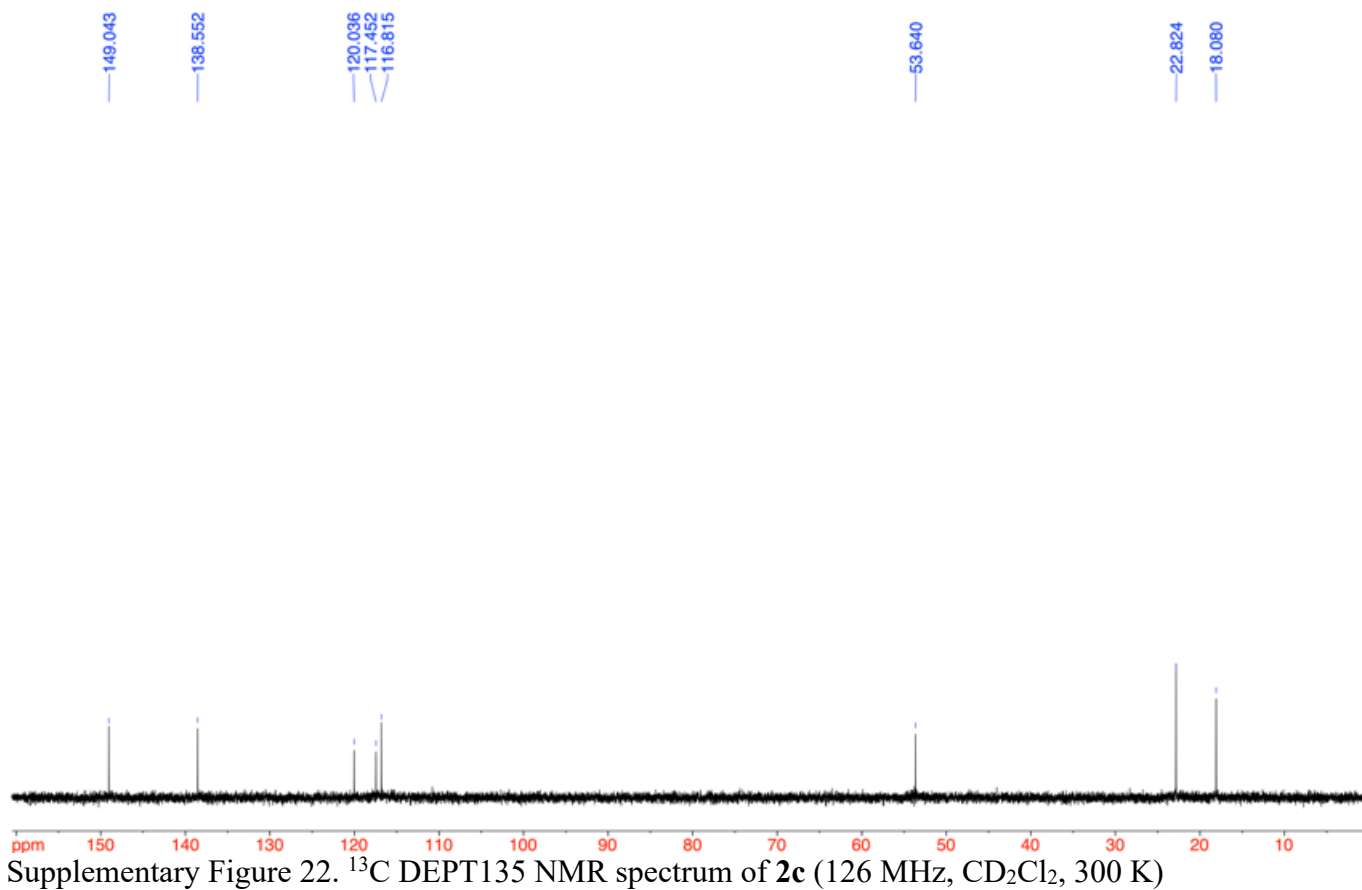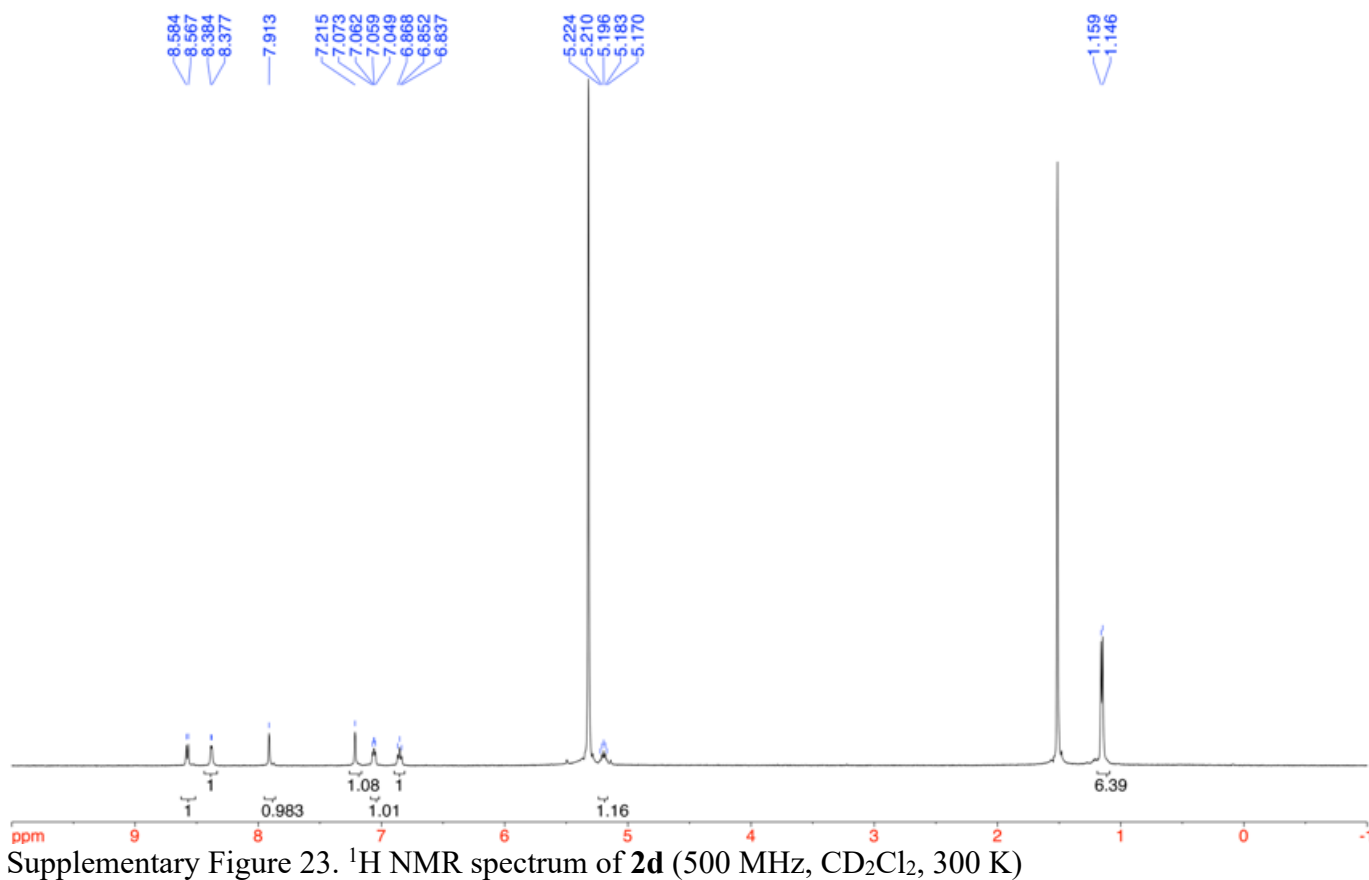



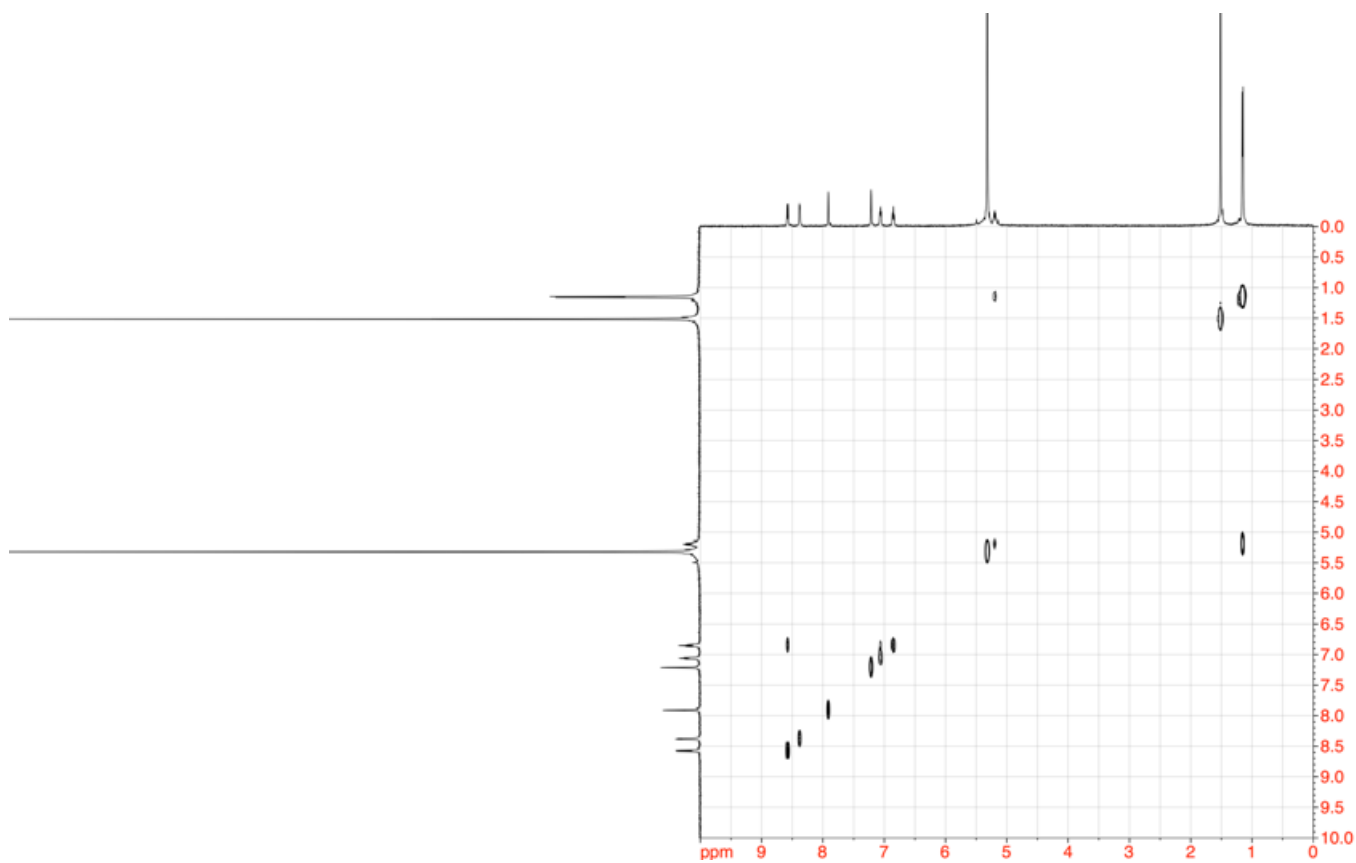

Supplementary Figure 24.  $^1\text{H}$ - $^1\text{H}$  COSY NMR spectrum of **2d** (500 MHz,  $\text{CD}_2\text{Cl}_2$ , 300 K)

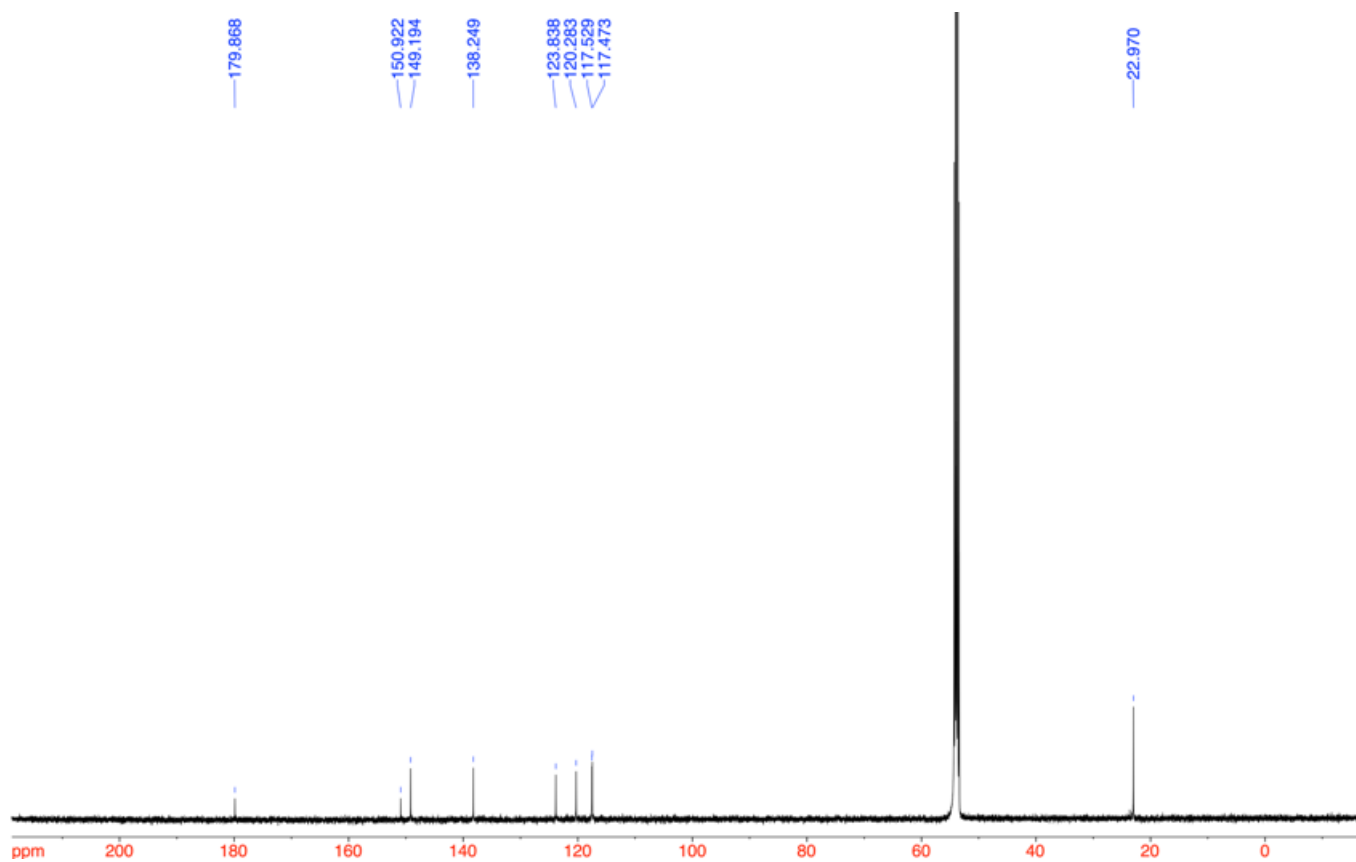

Supplementary Figure 25.  $^{13}\text{C}$  NMR spectrum of **2d** (126 MHz,  $\text{CD}_2\text{Cl}_2$ , 300 K)

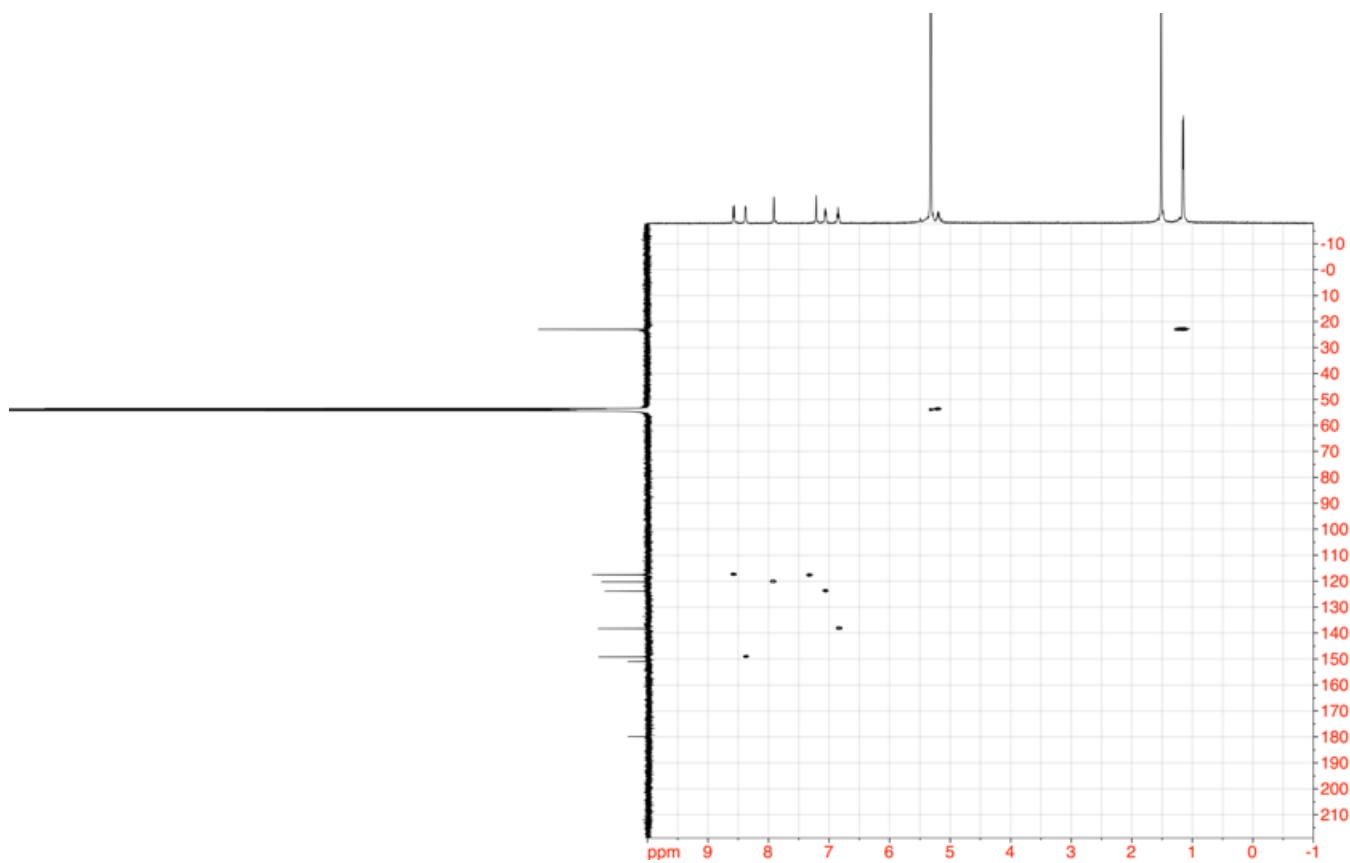

149.130 138.180 123.782 120.226 117.746 117.408 53.771 22.971

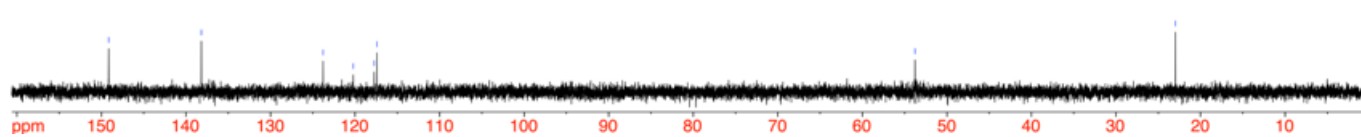

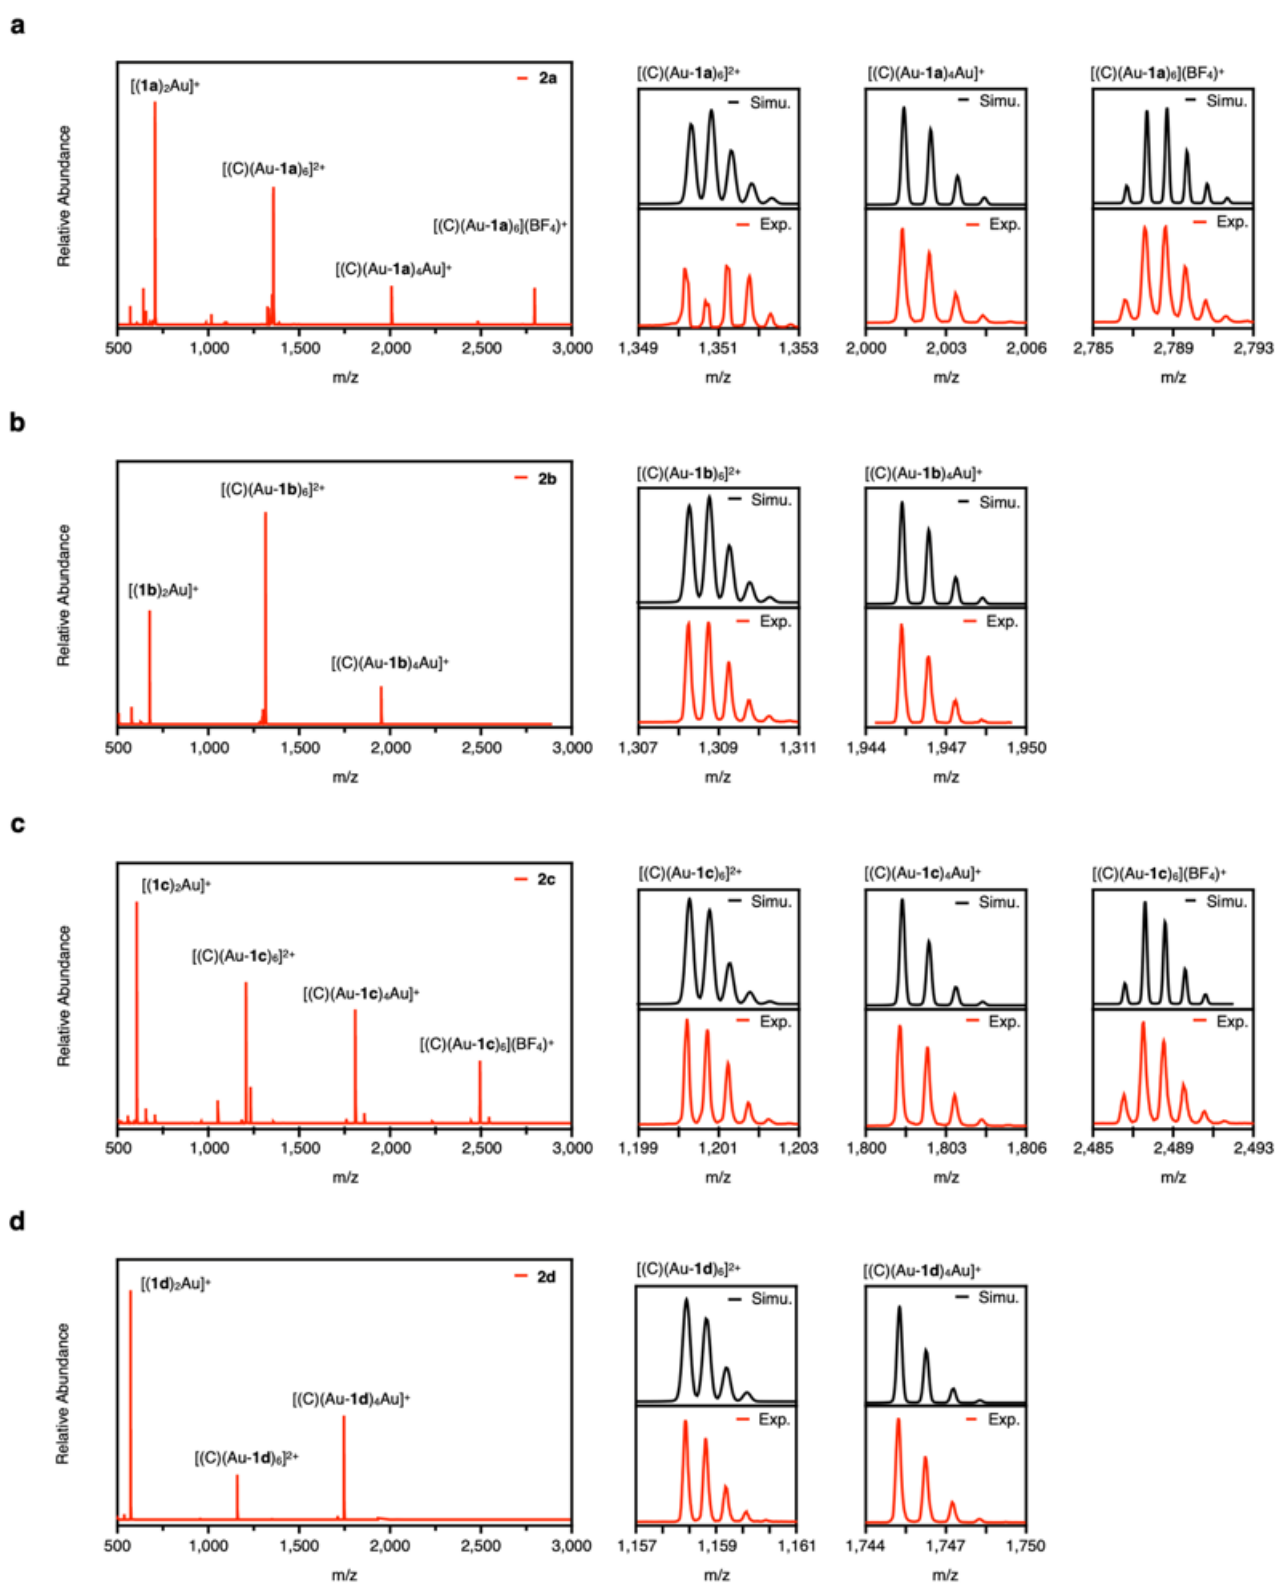

Supplementary Figure 28. MS spectra of **2a** (a), **2b** (b), **2c** (c) and **2d** (d) in  $\text{CH}_2\text{Cl}_2$

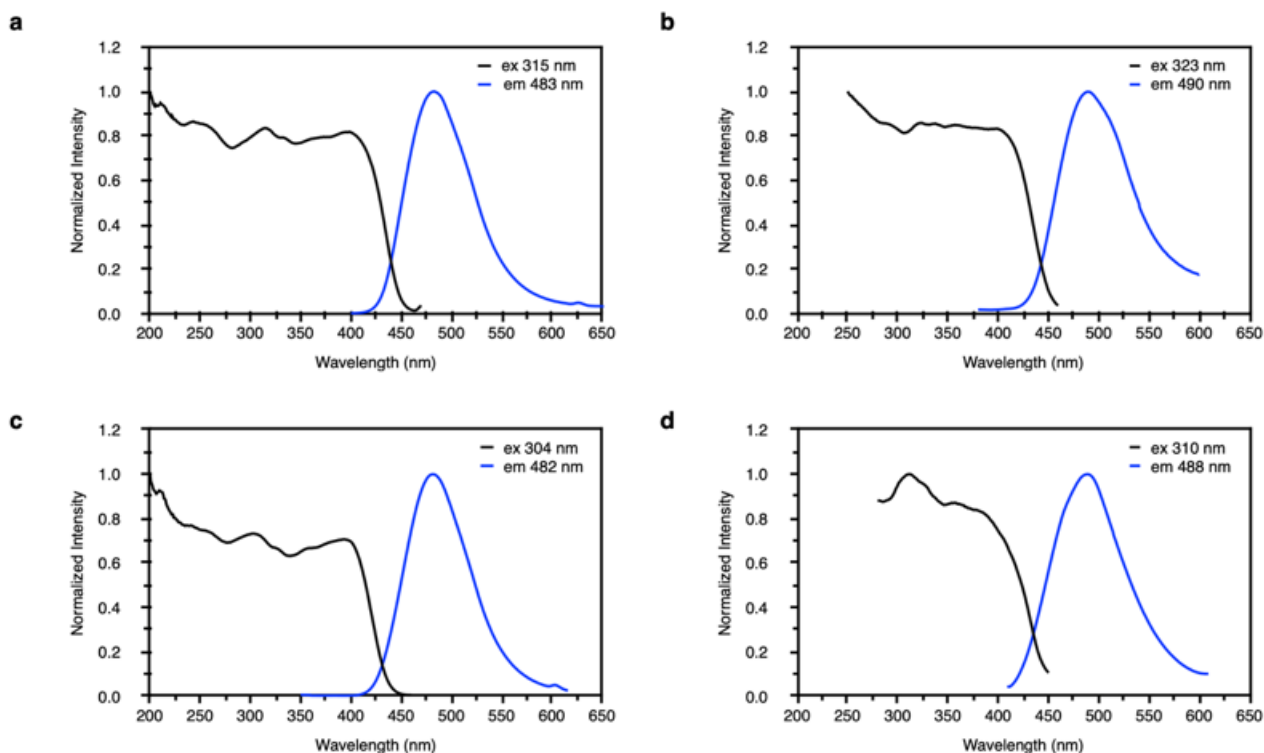

Supplementary Figure 29. Excitation and emission spectra of **2a** (a), **2b** (b), **2c** (c) and **2d** (d) in the solid state (room temperature)

Supplementary Table 9. Cartesian coordinates of calculated structure of **2b**

|    |             |            |             |   |             |             |             |
|----|-------------|------------|-------------|---|-------------|-------------|-------------|
| Au | 0.92840462  | 1.48951035 | 1.30797421  | C | -4.64165562 | -1.75670831 | 0.74139099  |
| N  | 1.26353948  | 4.04811777 | 2.99387650  | H | -4.60629643 | -0.74592849 | 0.35932393  |
| N  | 2.45279392  | 2.39570788 | 3.81718280  | C | -4.92308182 | -2.84234261 | -0.08717625 |
| N  | -0.55960678 | 5.49478356 | 2.64284492  | H | -5.10318892 | -2.68381842 | -1.14327979 |
| C  | 3.20961591  | 3.59729293 | 5.96829724  | C | -4.99341178 | -4.12616826 | 0.46267106  |
| H  | 3.81575102  | 2.80505986 | 6.38206321  | H | -5.23017006 | -4.98646018 | -0.14992604 |
| C  | 1.76334359  | 4.50614418 | 4.23317708  | C | -5.75995571 | -1.45573653 | 4.90819895  |
| C  | 0.79947379  | 4.89814583 | 0.74139099  | H | -6.12295284 | -2.39245320 | 4.51269026  |
| H  | 1.65715519  | 4.36213397 | 0.35932393  | C | -2.41668940 | 2.12702213  | 3.96703198  |
| C  | 0.00000000  | 5.68468522 | -0.08717625 | H | -1.80214594 | 2.11665037  | 3.06368691  |
| H  | 0.22733953  | 5.76140047 | -1.14327979 | C | -1.48667202 | 1.97739229  | 5.18458732  |
| C  | -1.07666064 | 6.38750558 | 0.46267106  | H | -2.04491687 | 1.97083840  | 6.12441315  |
| H  | -1.70331616 | 7.02269021 | -0.14992604 | H | -0.78830984 | 2.82001526  | 5.19989068  |
| C  | 1.61927302  | 5.71613624 | 4.90819895  | H | -0.91219867 | 1.04986987  | 5.10737431  |
| H  | 0.98955118  | 6.49885929 | 4.51269026  | C | -6.21295012 | -0.94511793 | 6.12209552  |
| C  | 3.05039990  | 1.02940335 | 3.96703198  | H | -6.96861380 | -1.48595085 | 6.67761971  |
| H  | 2.73414596  | 0.50237898 | 3.06368691  | C | -3.22869154 | 3.43379665  | 3.99620031  |
| C  | 2.45580797  | 0.29879959 | 5.18458732  | H | -3.90333649 | 3.47990573  | 3.13524287  |
| H  | 2.72925456  | 0.78553075 | 6.12441315  | H | -2.52594509 | 4.27129876  | 3.93717074  |

|    |             |             |             |    |             |             |             |
|----|-------------|-------------|-------------|----|-------------|-------------|-------------|
| H  | 2.83635978  | -0.72731129 | 5.19989068  | H  | -3.82090954 | 3.52781693  | 4.91026072  |
| H  | 1.36531331  | 0.26505229  | 5.10737431  | C  | -5.70106511 | 0.25709969  | 6.64278815  |
| C  | 2.28797893  | 5.85313160  | 6.12209552  | H  | -6.07407464 | 0.62705120  | 7.58959880  |
| H  | 2.19743572  | 6.77797198  | 6.67761971  | C  | -4.77508431 | -4.27434550 | 1.83102349  |
| C  | 4.58810090  | 1.07923057  | 3.99620031  | H  | -4.83326401 | -5.24729235 | 2.30254749  |
| H  | 4.96535502  | 1.64043570  | 3.13524287  | C  | -3.21203367 | 0.06862100  | 2.75292196  |
| H  | 4.96202578  | 0.05188324  | 3.93717074  | C  | -4.41695705 | -2.00923943 | 2.09679839  |
| H  | 4.96563385  | 1.54509626  | 4.91026072  | C  | -4.26134792 | 0.47371003  | 4.75037930  |
| C  | 3.07318743  | 4.80871738  | 6.64278815  | Au | 0.82575149  | -1.54877716 | 1.30797421  |
| H  | 3.58007959  | 4.94677735  | 7.58959880  | N  | 2.87400308  | -3.11831618 | 2.99387650  |
| C  | -1.31414963 | 6.27251706  | 1.83102349  | N  | 0.84834692  | -3.32203578 | 3.81718280  |
| H  | -2.12765647 | 6.80937558  | 2.30254749  | N  | 5.03842556  | -2.26275810 | 2.64284492  |
| C  | 0.00000000  | 0.00000000  | 0.00000000  | C  | 1.51053910  | -4.57825538 | 5.96829724  |
| C  | 1.66544437  | 2.74739226  | 2.75292196  | H  | 0.52137758  | -4.70706725 | 6.38206321  |
| C  | 0.46842614  | 4.82981672  | 2.09679839  | C  | 3.02076354  | -3.78017243 | 4.23317708  |
| C  | 2.54091888  | 3.45358054  | 4.75037930  | C  | 3.84218183  | -3.14143753 | 0.74139099  |
| Au | -1.75415611 | 0.05926681  | 1.30797421  | H  | 2.94914124  | -3.61620548 | 0.35932393  |
| C  | -4.72015502 | 0.98096245  | 5.96829724  | N  | -4.13754257 | -0.92980160 | 2.99387650  |
| H  | -4.33712860 | 1.90200739  | 6.38206321  | N  | -3.30114084 | 0.92632790  | 3.81718280  |
| C  | -4.78410713 | -0.72597175 | 4.23317708  | N  | -4.47881878 | -3.23202548 | 2.64284492  |
| C  | 4.92308182  | -2.84234261 | -0.08717625 | C  | -2.45580797 | -0.29879959 | -5.18458732 |
| H  | 4.87584939  | -3.07758203 | -1.14327979 | H  | -2.72925456 | -0.78553075 | -6.12441315 |
| C  | 6.07007242  | -2.26133733 | 0.46267106  | H  | -2.83635978 | 0.72731129  | -5.19989068 |
| H  | 6.93348622  | -2.03623005 | -0.14992604 | H  | -1.36531331 | -0.26505229 | -5.10737431 |
| C  | 4.14068266  | -4.26039968 | 4.90819895  | C  | -2.28797893 | -5.85313160 | -6.12209552 |
| H  | 5.13340167  | -4.10640612 | 4.51269026  | H  | -2.19743572 | -6.77797198 | -6.67761971 |
| C  | -0.63371050 | -3.15642548 | 3.96703198  | C  | -4.58810090 | -1.07923057 | -3.99620031 |
| H  | -0.93200002 | -2.61902935 | 3.06368691  | H  | -4.96535502 | -1.64043570 | -3.13524287 |
| C  | -0.96913594 | -2.27619188 | 5.18458732  | H  | -4.96202578 | -0.05188324 | -3.93717074 |
| H  | -0.68433769 | -2.75636916 | 6.12441315  | H  | -4.96563385 | -1.54509626 | -4.91026072 |
| H  | -2.04804994 | -2.09270398 | 5.19989068  | C  | -3.07318743 | -4.80871738 | -6.64278815 |
| H  | -0.45311464 | -1.31492216 | 5.10737431  | H  | -3.58007959 | -4.94677735 | -7.58959880 |
| C  | 3.92497119  | -4.90801367 | 6.12209552  | C  | 1.31414963  | -6.27251706 | -1.83102349 |
| H  | 4.77117808  | -5.29202115 | 6.67761971  | H  | 2.12765647  | -6.80937558 | -2.30254749 |
| C  | -1.35940936 | -4.51302721 | 3.99620031  | C  | -1.66544437 | -2.74739226 | -2.75292196 |
| H  | -1.06201852 | -5.12034143 | 3.13524287  | C  | -0.46842614 | -4.82981672 | -2.09679839 |
| H  | -2.43608069 | -4.32318200 | 3.93717074  | C  | -2.54091888 | -3.45358054 | -4.75037930 |
| H  | -1.14472432 | -5.07291319 | 4.91026072  | Au | 1.75415611  | -0.05926681 | -1.30797421 |
| C  | 2.62787770  | -5.06581707 | 6.64278815  | N  | 4.13754257  | 0.92980160  | -2.99387650 |
| H  | 2.49399505  | -5.57382857 | 7.58959880  | N  | 3.30114084  | -0.92632790 | -3.81718280 |
| C  | 6.08923393  | -1.99817157 | 1.83102349  | N  | 4.47881878  | 3.23202548  | -2.64284492 |
| H  | 6.96092046  | -1.56208324 | 2.30254749  | C  | 4.72015502  | -0.98096245 | -5.96829724 |

|    |             |             |             |   |             |             |             |
|----|-------------|-------------|-------------|---|-------------|-------------|-------------|
| C  | 1.54658930  | -2.81601325 | 2.75292196  | H | 4.33712860  | -1.90200739 | -6.38206321 |
| C  | 3.94853091  | -2.82057730 | 2.09679839  | C | 4.78410713  | 0.72597175  | -4.23317708 |
| C  | 1.72042904  | -3.92729057 | 4.75037930  | C | 4.64165562  | 1.75670831  | -0.74139099 |
| Au | -0.92840462 | -1.48951035 | -1.30797421 | H | 4.60629643  | 0.74592849  | -0.35932393 |
| N  | -1.26353948 | -4.04811777 | -2.99387650 | C | 4.92308182  | 2.84234261  | 0.08717625  |
| N  | -2.45279392 | -2.39570788 | -3.81718280 | H | 5.10318892  | 2.68381842  | 1.14327979  |
| N  | 0.55960678  | -5.49478356 | -2.64284492 | C | 4.99341178  | 4.12616826  | -0.46267106 |
| C  | -3.20961591 | -3.59729293 | -5.96829724 | H | 5.23017006  | 4.98646018  | 0.14992604  |
| H  | -3.81575102 | -2.80505986 | -6.38206321 | C | 5.75995571  | 1.45573653  | -4.90819895 |
| C  | -1.76334359 | -4.50614418 | -4.23317708 | H | 6.12295284  | 2.39245320  | -4.51269026 |
| C  | -0.79947379 | -4.89814583 | -0.74139099 | C | 2.41668940  | -2.12702213 | -3.96703198 |
| H  | -1.65715519 | -4.36213397 | -0.35932393 | H | 1.80214594  | -2.11665037 | -3.06368691 |
| C  | 0.00000000  | -5.68468522 | 0.08717625  | C | 1.48667202  | -1.97739229 | -5.18458732 |
| H  | -0.22733953 | -5.76140047 | 1.14327979  | H | 2.04491687  | -1.97083840 | -6.12441315 |
| C  | 1.07666064  | -6.38750558 | -0.46267106 | H | 0.78830984  | -2.82001526 | -5.19989068 |
| H  | 1.70331616  | -7.02269021 | 0.14992604  | H | 0.91219867  | -1.04986987 | -5.10737431 |
| C  | -1.61927302 | -5.71613624 | -4.90819895 | C | 6.21295012  | 0.94511793  | -6.12209552 |
| H  | -0.98955118 | -6.49885929 | -4.51269026 | H | 6.96861380  | 1.48595085  | -6.67761971 |
| C  | -3.05039990 | -1.02940335 | -3.96703198 | C | 3.22869154  | -3.43379665 | -3.99620031 |
| H  | -2.73414596 | -0.50237898 | -3.06368691 | H | 3.90333649  | -3.47990573 | -3.13524287 |
| H  | 2.52594509  | -4.27129876 | -3.93717074 | C | -4.14068266 | 4.26039968  | -4.90819895 |
| H  | 3.82090954  | -3.52781693 | -4.91026072 | H | -5.13340167 | 4.10640612  | -4.51269026 |
| C  | 5.70106511  | -0.25709969 | -6.64278815 | C | 0.63371050  | 3.15642548  | -3.96703198 |
| H  | 6.07407464  | -0.62705120 | -7.58959880 | H | 0.93200002  | 2.61902935  | -3.06368691 |
| C  | 4.77508431  | 4.27434550  | -1.83102349 | C | 0.96913594  | 2.27619188  | -5.18458732 |
| H  | 4.83326401  | 5.24729235  | -2.30254749 | H | 0.68433769  | 2.75636916  | -6.12441315 |
| C  | 3.21203367  | -0.06862100 | -2.75292196 | H | 2.04804994  | 2.09270398  | -5.19989068 |
| C  | 4.41695705  | 2.00923943  | -2.09679839 | H | 0.45311464  | 1.31492216  | -5.10737431 |
| C  | 4.26134792  | -0.47371003 | -4.75037930 | C | -3.92497119 | 4.90801367  | -6.12209552 |
| Au | -0.82575149 | 1.54877716  | -1.30797421 | H | -4.77117808 | 5.29202115  | -6.67761971 |
| N  | -2.87400308 | 3.11831618  | -2.99387650 | C | 1.35940936  | 4.51302721  | -3.99620031 |
| N  | -0.84834692 | 3.32203578  | -3.81718280 | H | 1.06201852  | 5.12034143  | -3.13524287 |
| N  | -5.03842556 | 2.26275810  | -2.64284492 | H | 2.43608069  | 4.32318200  | -3.93717074 |
| C  | -1.51053910 | 4.57825538  | -5.96829724 | H | 1.14472432  | 5.07291319  | -4.91026072 |
| H  | -0.52137758 | 4.70706725  | -6.38206321 | C | -2.62787770 | 5.06581707  | -6.64278815 |
| C  | -3.02076354 | 3.78017243  | -4.23317708 | H | -2.49399505 | 5.57382857  | -7.58959880 |
| C  | -3.84218183 | 3.14143753  | -0.74139099 | C | -6.08923393 | 1.99817157  | -1.83102349 |
| H  | -2.94914124 | 3.61620548  | -0.35932393 | H | -6.96092046 | 1.56208324  | -2.30254749 |
| C  | -4.92308182 | 2.84234261  | 0.08717625  | C | -1.54658930 | 2.81601325  | -2.75292196 |
| H  | -4.87584939 | 3.07758203  | 1.14327979  | C | -3.94853091 | 2.82057730  | -2.09679839 |
| C  | -6.07007242 | 2.26133733  | -0.46267106 | C | -1.72042904 | 3.92729057  | -4.75037930 |
| H  | -6.93348622 | 2.03623005  | 0.14992604  |   |             |             |             |

Supplementary Table 10. Cartesian coordinates of calculated structure of **2d**

|    |             |             |             |    |             |             |             |
|----|-------------|-------------|-------------|----|-------------|-------------|-------------|
| Au | -1.66137144 | -0.46182766 | 1.37948399  | C  | 4.50532695  | -2.37915212 | 3.97563615  |
| Au | 1.38398223  | -0.76926128 | 1.47838556  | H  | 5.21843456  | -3.16256910 | 4.14870958  |
| Au | 0.15779762  | 1.97595359  | 0.86755478  | C  | 3.46682795  | -3.60200589 | 2.07764461  |
| N  | -3.03335588 | -1.78977049 | 3.76801128  | C  | 2.23949688  | -4.13922732 | 1.68848238  |
| N  | -4.53706771 | -0.80085345 | 2.55482375  | H  | 1.31052025  | -3.68095456 | 1.99570384  |
| N  | -6.44643185 | -0.49293576 | 1.25848711  | C  | 2.25701842  | -5.28862072 | 0.89781925  |
| N  | 3.22888576  | -0.56175553 | 3.92682985  | H  | 1.32254247  | -5.73485382 | 0.57951878  |
| N  | 3.54972624  | -2.46482765 | 2.94237590  | C  | 3.48279571  | -5.86131115 | 0.54231569  |
| N  | 4.65156750  | -4.12342155 | 1.73064244  | H  | 3.52826028  | -6.76826385 | -0.04635345 |
| N  | -0.56596023 | 4.41039478  | 2.63136493  | C  | 4.65580690  | -5.24633162 | 0.97820700  |
| N  | 1.29997549  | 4.76566020  | 1.58881342  | H  | 5.62734617  | -5.65253844 | 0.72588157  |
| N  | 2.27439013  | 4.50663750  | -0.55579786 | C  | 2.67423640  | 0.77450005  | 4.29917915  |
| C  | -0.02738028 | -0.03079981 | -0.01691839 | C  | 1.93283540  | 0.67759085  | 5.64436869  |
| C  | -3.17162343 | -0.98152093 | 2.67025813  | H  | 1.14972045  | -0.08514956 | 5.59311713  |
| C  | -4.28837584 | -2.13455927 | 4.30822600  | H  | 1.46881931  | 1.64200034  | 5.87630824  |
| H  | -4.39712319 | -2.75619648 | 5.17738514  | H  | 2.62244838  | 0.42373861  | 6.45634212  |
| C  | -5.22851441 | -1.52451791 | 3.54797407  | C  | 0.29538358  | 3.83067767  | 1.73922619  |
| H  | -6.30040920 | -1.51764771 | 3.59659015  | C  | -0.11290358 | 5.68172400  | 3.02810548  |
| C  | -5.23521814 | -0.01891498 | 1.57337064  | H  | -0.65276248 | 6.30329136  | 3.71847313  |
| C  | -4.70890699 | 1.16369160  | 1.04991941  | C  | 1.05646419  | 5.90623782  | 2.37939246  |
| H  | -3.73169163 | 1.51490687  | 1.34751427  | H  | 1.71641501  | 6.75489265  | 2.38567257  |
| C  | -5.48721839 | 1.87505887  | 0.13373056  | C  | 2.46646708  | 4.58011411  | 0.76772754  |
| H  | -5.12245792 | 2.80441744  | -0.29103005 | C  | 3.71536229  | 4.47192497  | 1.37700808  |
| C  | -6.75116868 | 1.38703897  | -0.21385599 | H  | 3.80543264  | 4.54597996  | 2.45243704  |
| H  | -7.38224334 | 1.92108903  | -0.91194001 | C  | 4.82443003  | 4.23511514  | 0.56512770  |
| C  | -7.19438404 | 0.20461987  | 0.37652697  | H  | 5.80943458  | 4.12880626  | 1.00198974  |
| H  | -8.17327358 | -0.20032660 | 0.15075271  | C  | 4.64328583  | 4.11876269  | -0.81451647 |
| C  | -1.71831791 | -2.28190346 | 4.28780395  | H  | 5.47515373  | 3.88300686  | -1.46414457 |
| H  | -0.97520953 | -1.64849331 | 3.79705417  | C  | 3.35870168  | 4.27399331  | -1.33295685 |
| C  | -1.64240066 | -2.08972611 | 5.81182492  | H  | 3.18027062  | 4.20484879  | -2.39787440 |
| H  | -1.85316051 | -1.05051101 | 6.08258571  | C  | -1.80150480 | 3.75143352  | 3.15707058  |
| H  | -0.63521982 | -2.34686587 | 6.15563429  | Au | 1.58743334  | 0.44774805  | -1.41093683 |
| H  | -2.34941335 | -2.74338735 | 6.33323412  | Au | -1.53043812 | 0.67937660  | -1.44488209 |
| C  | -1.49313218 | -3.74433542 | 3.86332552  | Au | -0.15077488 | -2.03599419 | -0.90399834 |
| H  | -2.26738829 | -4.39516155 | 4.28427685  | N  | 2.78851550  | 1.55883910  | -3.99904476 |
| H  | -0.52087502 | -4.08476299 | 4.23601979  | N  | 4.41146974  | 1.01594304  | -2.66611940 |
| H  | -1.50056014 | -3.83031999 | 2.77209262  | N  | 6.35354637  | 1.22987617  | -1.40165895 |
| C  | 2.76577187  | -1.32856522 | 2.89210387  | N  | -3.91603109 | 0.68608312  | -3.45930148 |
| C  | 4.29260295  | -1.19607866 | 4.59764788  | N  | -3.46573080 | 2.68463469  | -2.75370380 |

|   |             |             |             |   |             |             |             |
|---|-------------|-------------|-------------|---|-------------|-------------|-------------|
| H | 4.79178021  | -0.75815838 | 5.44188679  | N | -3.80789201 | 4.66741878  | -1.57362831 |
| N | 0.85143611  | -4.36305506 | -2.63159000 | H | -4.76818179 | -0.93018846 | -4.41346927 |
| N | -1.05593373 | -4.91874262 | -1.75745411 | C | -2.64719272 | -1.30324474 | -4.30883355 |
| N | -2.39011857 | -4.27134759 | 0.09019605  | H | -1.82432056 | -1.19956956 | -3.59632902 |
| C | 3.03232763  | 0.98571121  | -2.77718444 | H | -2.75866417 | -2.36253361 | -4.56421508 |
| C | 3.98419132  | 1.95800337  | -4.62644735 | H | -2.41100106 | -0.74431092 | -5.22007442 |
| H | 4.00612829  | 2.42077529  | -5.59577477 | C | -4.32754008 | -1.53217342 | -2.38644390 |
| C | 4.99819296  | 1.62948780  | -3.79303684 | H | -5.25183050 | -1.12731851 | -1.96285416 |
| H | 6.06110419  | 1.75544778  | -3.86820141 | H | -4.47058037 | -2.59633654 | -2.59803132 |
| C | 5.22108565  | 0.53623068  | -1.58319298 | H | -3.52646000 | -1.42608360 | -1.64999553 |
| C | 4.88515368  | -0.59818120 | -0.84300634 | C | -0.13508345 | -3.88380764 | -1.80939838 |
| H | 3.96475307  | -1.13154383 | -1.03309923 | C | 0.56375506  | -5.66440736 | -3.07833250 |
| C | 5.78149397  | -1.02491164 | 0.14018938  | H | 1.22189941  | -6.21986403 | -3.72040411 |
| H | 5.57274508  | -1.91868727 | 0.71845558  | C | -0.62486341 | -6.01603305 | -2.53443755 |
| C | 6.96632511  | -0.31038812 | 0.34327286  | H | -1.17874409 | -6.93475423 | -2.59451455 |
| H | 7.68740520  | -0.62403148 | 1.08645997  | C | -2.33017383 | -4.87269866 | -1.10329197 |
| C | 7.21396508  | 0.80776977  | -0.45034603 | C | -3.44122539 | -5.44219874 | -1.73480856 |
| H | 8.12484825  | 1.38277606  | -0.33614902 | H | -3.34979418 | -5.89453067 | -2.71312395 |
| C | 1.43094447  | 1.76381829  | -4.59119166 | C | -4.67147880 | -5.38731169 | -1.08186741 |
| H | 0.74078161  | 1.35775591  | -3.84756600 | H | -5.54962569 | -5.82507976 | -1.53992300 |
| C | 1.30110304  | 0.97283842  | -5.90449683 | C | -4.75567207 | -4.74778762 | 0.15744189  |
| H | 1.50673605  | -0.08787999 | -5.73385134 | H | -5.69506588 | -4.67499700 | 0.68894329  |
| H | 0.28193720  | 1.07635064  | -6.29079627 | C | -3.59669130 | -4.19884493 | 0.70027301  |
| H | 1.99321214  | 1.35159976  | -6.66393994 | H | -3.61613826 | -3.68911154 | 1.65303564  |
| C | 1.16026139  | 3.26697493  | -4.78239268 | C | 2.02245839  | -3.55540148 | -3.09850843 |
| H | 1.83697767  | 3.69879645  | -5.52736252 | H | 2.04123419  | -2.68942647 | -2.43296963 |
| H | 0.13308961  | 3.41130171  | -5.13267921 | C | 3.32856560  | -4.35323876 | -2.95961630 |
| H | 1.28529176  | 3.80108657  | -3.83550878 | H | 3.34821325  | -5.20997399 | -3.64196839 |
| C | -3.02524943 | 1.37403548  | -2.68025936 | H | 4.17174662  | -3.70340318 | -3.21573084 |
| C | -4.90029702 | 1.54445986  | -3.98765854 | H | 3.45704962  | -4.70620176 | -1.93311471 |
| H | -5.68407053 | 1.18726631  | -4.63076544 | C | 1.77130579  | -3.08107578 | -4.54122227 |
| C | -4.62860338 | 2.79177427  | -3.53988294 | H | 0.83928798  | -2.50957502 | -4.59089999 |
| H | -5.12200822 | 3.73298945  | -3.69054702 | H | 2.59743053  | -2.43831367 | -4.86303291 |
| C | -2.90312659 | 3.81629897  | -2.07719309 | H | 1.70686931  | -3.93254580 | -5.22699994 |
| C | -1.52663103 | 4.01000821  | -1.98837721 | H | 1.96418004  | 1.01005205  | 3.50247645  |
| H | -0.83879167 | 3.29447646  | -2.41311461 | C | 3.79289044  | 1.82987215  | 4.31757159  |
| C | -1.06497072 | 5.14561003  | -1.32111580 | H | 4.52318592  | 1.62339985  | 5.10684423  |
| H | 0.00341351  | 5.28710845  | -1.20086648 | H | 3.35247485  | 2.81325397  | 4.51349078  |
| C | -1.99344896 | 6.05652029  | -0.80710357 | H | 4.30510458  | 1.85673268  | 3.35126056  |
| H | -1.67121108 | 6.95822494  | -0.30221792 | C | -1.62184970 | 3.41642892  | 4.64822736  |
| C | -3.35264024 | 5.78366317  | -0.95962229 | H | -0.73974609 | 2.78433648  | 4.79137273  |
| H | -4.10609520 | 6.46462470  | -0.58275449 | H | -2.50321396 | 2.87661808  | 5.00943078  |



|   |             |             |             |   |             |            |            |
|---|-------------|-------------|-------------|---|-------------|------------|------------|
| C | -3.95968648 | -0.79727314 | -3.68751333 | H | -1.50909501 | 4.32797472 | 5.24465228 |
| H | -1.87793096 | 2.82455212  | 2.58328106  | H | -3.93636957 | 4.09141807 | 3.19589210 |
| C | -3.03409529 | 4.63203454  | 2.89240022  | H | -2.98731379 | 5.56220461 | 3.46889080 |
| H | -3.10783261 | 4.87441184  | 1.82862284  |   |             |            |            |

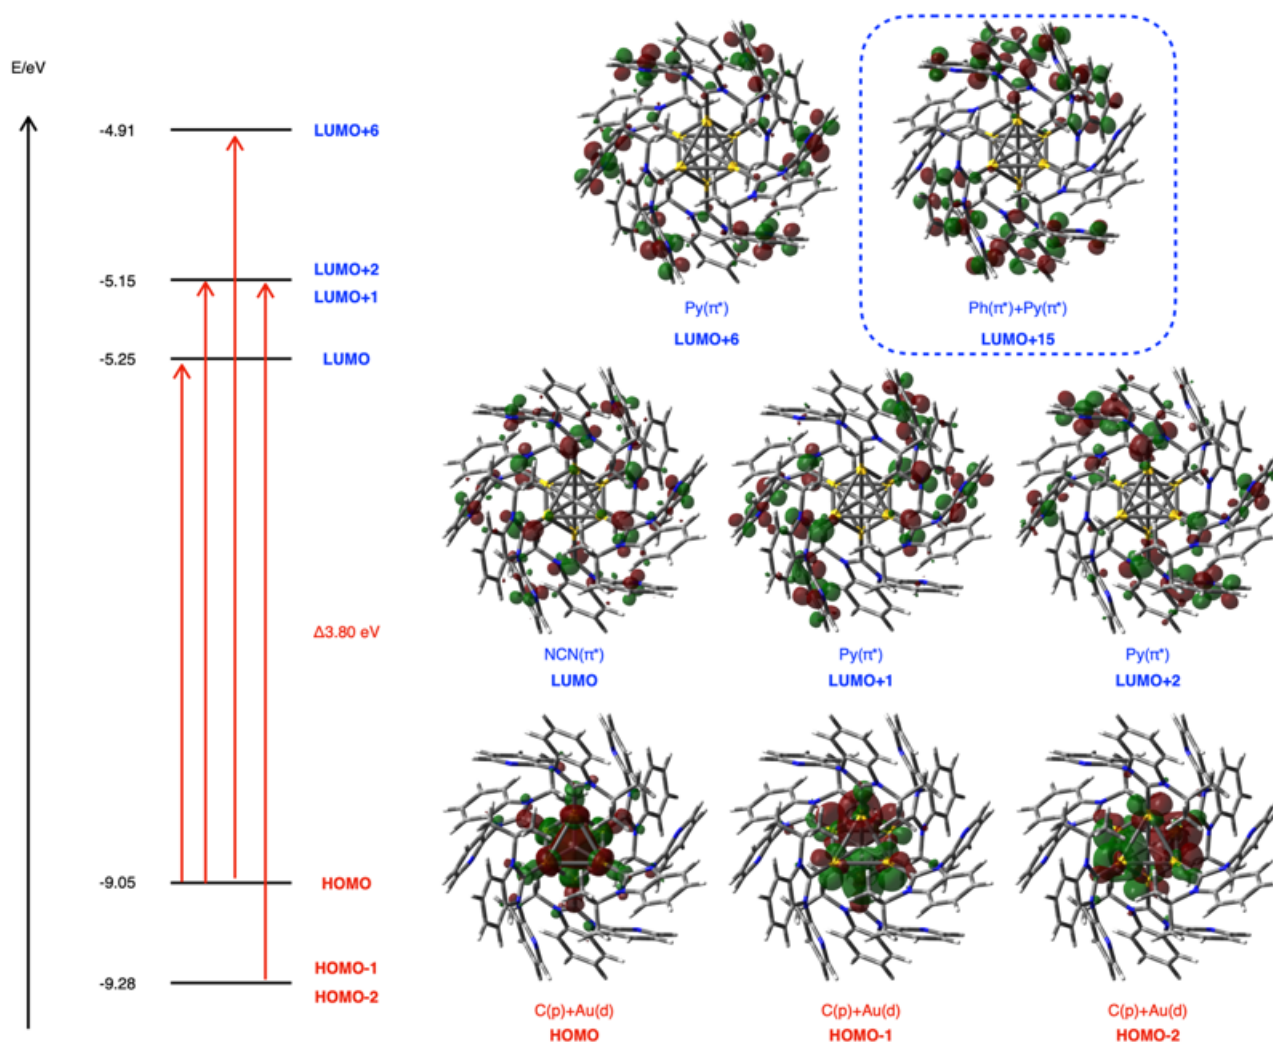

Supplementary Figure 30. Calculated frontier orbitals and energy level of **2b** (isovalue = |0.04|)

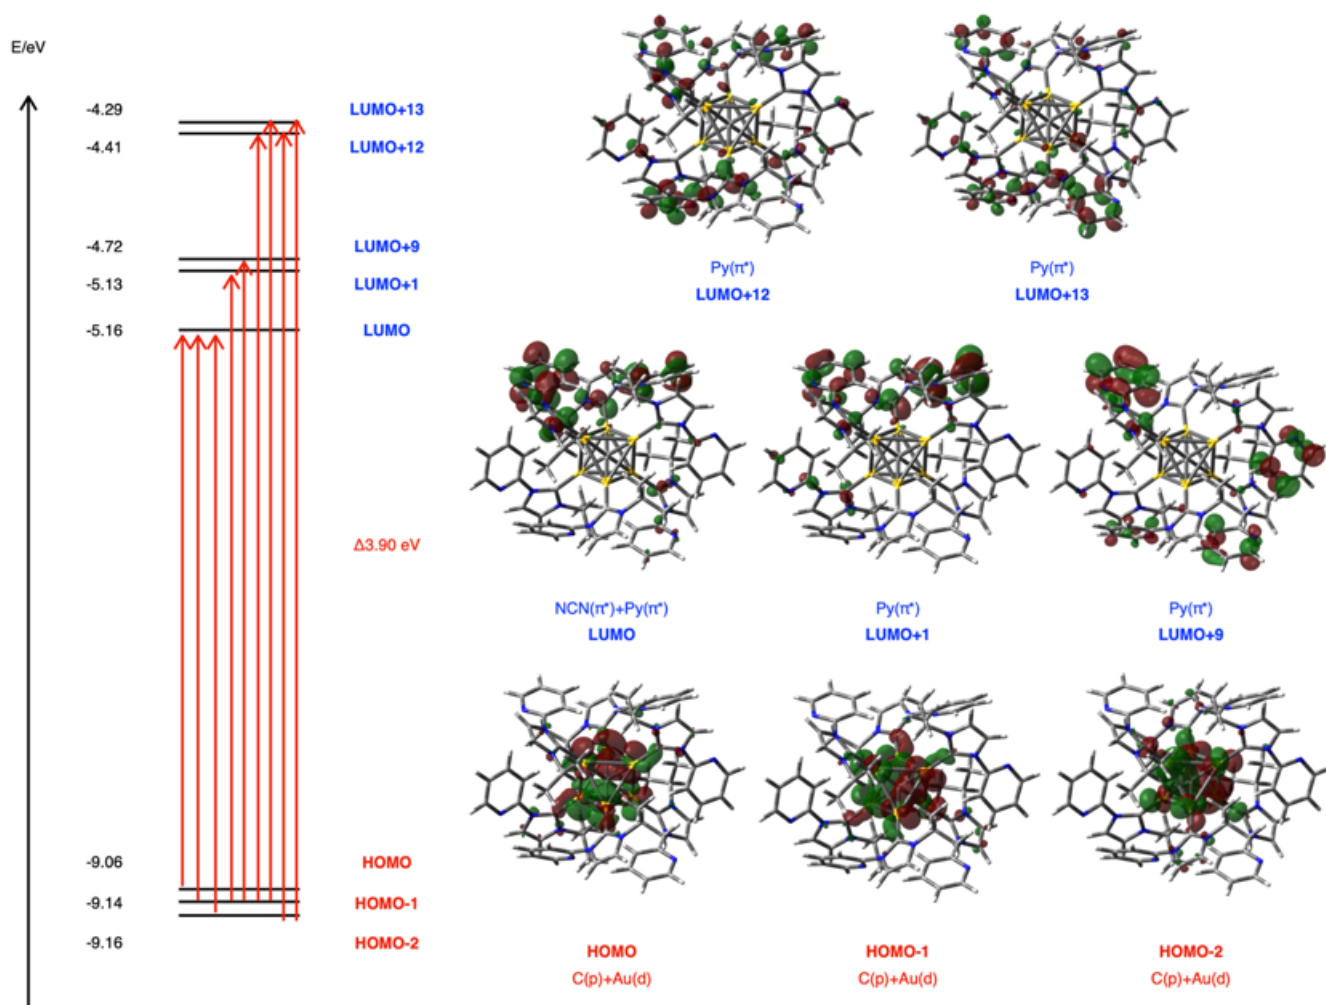

Supplementary Figure 31. Calculated frontier orbitals and energy level of **2d** (isovalue = |0.04|)

Supplementary Table 11. Cartesian coordinates of calculated structures of *LiPr*, *BiPr*, **1b** and **1d**

*LiPr*

|   |             |             |             |   |             |             |             |
|---|-------------|-------------|-------------|---|-------------|-------------|-------------|
| N | -1.06691074 | -0.00000648 | -0.07184658 | C | 0.67751656  | -0.00001448 | 1.26333498  |
| N | 1.06691075  | -0.00000637 | -0.07184331 | H | 4.19316008  | 1.30046511  | -0.55485085 |
| C | -0.67751908 | -0.00002193 | 1.26333521  | H | -1.37048399 | -0.00002247 | 2.08933658  |
| C | 2.45814986  | 0.00000902  | -0.54789106 | H | 1.37047831  | -0.00004715 | 2.08933909  |
| H | 2.35821649  | 0.00002676  | -1.63487211 | H | -2.35821718 | 0.00000218  | -1.63487576 |
| C | 3.19165426  | 1.27318182  | -0.11689501 | C | -3.19165247 | 1.27318411  | -0.11691611 |
| H | 3.30583014  | 1.32785703  | 0.97019486  | H | -2.65092956 | 2.16308348  | -0.44666822 |
| H | 2.65092965  | 2.16308684  | -0.44662811 | H | -4.19316011 | 1.30045611  | -0.55486838 |
| C | 3.19166784  | -1.27317056 | -0.11693805 | H | -3.30582098 | 1.32787609  | 0.97017371  |
| H | 2.65095301  | -2.16307001 | -0.44670207 | C | -3.19167025 | -1.27316755 | -0.11691549 |
| H | 4.19317432  | -1.30042843 | -0.55489417 | H | -3.30585450 | -1.32784907 | 0.97017323  |
| H | 3.30584420  | -1.32788173 | 0.97015013  | H | -4.19317131 | -1.30043274 | -0.55488232 |
| C | 0.00000069  | 0.00000373  | -0.92616092 | H | -2.65095126 | -2.16307499 | -0.44665237 |

|   |             |            |             |  |  |  |
|---|-------------|------------|-------------|--|--|--|
| C | -2.45814698 | 0.00000299 | -0.54789422 |  |  |  |
|---|-------------|------------|-------------|--|--|--|

**BIPr**

|   |             |             |             |   |             |             |             |
|---|-------------|-------------|-------------|---|-------------|-------------|-------------|
| N | 1.08153821  | -0.78198691 | 0.00000618  | H | -3.41098091 | 0.11554393  | -1.35511005 |
| N | -1.08153691 | -0.78198799 | 0.00000798  | C | -0.70053919 | 2.95475196  | -0.00000357 |
| C | -1.42020168 | 1.76267811  | 0.00000013  | H | -1.23575032 | 3.89849709  | -0.00000525 |
| H | -2.50246848 | 1.78083598  | 0.00000040  | C | 0.00000124  | -1.61745568 | 0.00000593  |
| C | 0.70411821  | 0.56445553  | 0.00000108  | C | 2.45217754  | -1.32345710 | 0.00000068  |
| C | 1.42019839  | 1.76268098  | -0.00000315 | C | -0.70411902 | 0.56445425  | 0.00000232  |
| H | 2.50246516  | 1.78084087  | -0.00000642 | H | -4.17471346 | -1.47306188 | 1.30091146  |
| C | -2.45217566 | -1.32345784 | 0.00000568  | H | 2.28750678  | -2.40235247 | -0.00000098 |
| H | -2.28750338 | -2.40235313 | 0.00002263  | C | 3.21155757  | -0.95588960 | -1.27883623 |
| C | -3.21156988 | -0.95587819 | 1.27883119  | H | 3.41101758  | 0.11556297  | -1.35507214 |
| H | -3.41105419 | 0.11557153  | 1.35504528  | H | 4.17471283  | -1.47305249 | -1.30091079 |
| H | -2.64564900 | -1.25773866 | 2.16307152  | H | 2.64563864  | -1.25777995 | -2.16306706 |
| C | 0.70053323  | 2.95475341  | -0.00000561 | C | 3.21156077  | -0.95589375 | 1.27883784  |
| H | 1.23574229  | 3.89849972  | -0.00000840 | H | 2.64564289  | -1.25778804 | 2.16306853  |
| C | -3.21154425 | -0.95591114 | -1.27884471 | H | 4.17471648  | -1.47305517 | 1.30091027  |
| H | -2.64562483 | -1.25783542 | -2.16306412 | H | 3.41101857  | 0.11555916  | 1.35507849  |
| H | -4.17470925 | -1.47305537 | -1.30091187 |   |             |             |             |

**1b**

|   |             |             |             |   |             |             |             |
|---|-------------|-------------|-------------|---|-------------|-------------|-------------|
| N | 0.58189666  | -0.23737721 | -0.00000020 | H | -3.97032143 | -0.76744641 | 1.35551835  |
| N | -1.47439135 | -0.90805457 | 0.00000253  | H | -2.81723586 | -1.83599892 | 2.16351906  |
| N | 2.67308290  | 0.82298712  | 0.00000564  | C | -0.96211260 | 3.19987112  | -0.00000388 |
| C | -2.59319809 | 1.39899893  | -0.00000156 | H | -0.75366023 | 4.26467627  | -0.00000512 |
| H | -3.62384080 | 1.06931063  | -0.00000064 | C | -3.44957240 | -1.72450426 | -1.27982178 |
| C | -0.19786344 | 0.93934086  | -0.00000236 | H | -2.81722560 | -1.83602367 | -2.16351197 |
| C | 2.62563986  | -1.57981893 | -0.00000751 | H | -4.20532944 | -2.51420036 | -1.30320291 |
| H | 2.02311766  | -2.47676000 | -0.00001470 | H | -3.97030727 | -0.76745224 | -1.35553037 |
| C | 4.00981481  | -1.61389140 | -0.00000383 | C | -2.29036738 | 2.75807666  | -0.00000274 |
| H | 4.52523266  | -2.56904016 | -0.00000906 | H | -3.09812932 | 3.48249710  | -0.00000258 |
| C | 4.73106853  | -0.41709474 | 0.00000273  | C | 4.01122020  | 0.76829694  | 0.00000824  |
| H | 5.81505370  | -0.40598596 | 0.00000445  | H | 4.52064687  | 1.72850329  | 0.00001099  |
| C | 0.10335170  | 2.30221623  | -0.00000297 | C | -0.20442652 | -1.37258722 | 0.00000234  |
| H | 1.12842078  | 2.63698385  | -0.00000239 | C | 1.99960958  | -0.32275281 | -0.00000175 |
| C | -2.61649388 | -1.84347435 | 0.00000427  | C | -1.53131586 | 0.49555201  | -0.00000189 |
| H | -2.12986483 | -2.82015959 | 0.00000893  | H | -4.20532960 | -2.51419595 | 1.30321127  |
| C | -3.44957862 | -1.72449492 | 1.27982450  |   |             |             |             |

**1d**

|   |             |             |             |   |            |            |             |
|---|-------------|-------------|-------------|---|------------|------------|-------------|
| N | -0.24477495 | -0.27563008 | 0.00000045  | H | 3.38787033 | 0.59169159 | 2.16362958  |
| N | 1.86591427  | 0.01866959  | -0.00000102 | C | 3.96639086 | 0.33403987 | -1.27375001 |

|   |             |             |             |   |             |             |             |
|---|-------------|-------------|-------------|---|-------------|-------------|-------------|
| N | -2.42319373 | -1.10649808 | 0.00000085  | H | 3.38787563  | 0.59166717  | -2.16363352 |
| C | 0.32016668  | -1.55296612 | 0.00000421  | H | 4.90362749  | 0.89618371  | -1.30140112 |
| C | -2.13123447 | 1.28189037  | -0.00000138 | H | 4.21850841  | -0.72940572 | -1.32779873 |
| H | -1.43662557 | 2.11056241  | -0.00000230 | C | -3.74778155 | -0.91686508 | 0.00000047  |
| C | -3.50624215 | 1.45633933  | -0.00000170 | H | -4.35282229 | -1.81968729 | 0.00000084  |
| H | -3.92395432 | 2.45803714  | -0.00000261 | C | 0.70780938  | 0.72306093  | -0.00000268 |
| C | -4.34282376 | 0.33788743  | -0.00000080 | C | -1.64201503 | -0.03049590 | 0.00000007  |
| H | -5.42240942 | 0.43630574  | -0.00000137 | C | 1.65696016  | -1.36383098 | 0.00000324  |
| C | 3.18625886  | 0.66992396  | -0.00000262 | H | 4.90362453  | 0.89619701  | 1.30139739  |
| H | 2.94861393  | 1.73512901  | -0.00000893 | H | -0.27914949 | -2.44584160 | 0.00000689  |
| C | 3.96638747  | 0.33405372  | 1.27375045  | H | 2.45745912  | -2.08546286 | 0.00000466  |
| H | 4.21850389  | -0.72939151 | 1.32781166  |   |             |             |             |

Supplementary Table 12. Cartesian coordinates of calculated structures of  $IiPr-Au^+$ ,  $BIiPr-Au^+$ ,  $1b-Au^+$  and  $1d-Au^+$

$IiPr-Au^+$

|   |             |             |             |    |             |             |             |
|---|-------------|-------------|-------------|----|-------------|-------------|-------------|
| N | 0.00000000  | 1.08997609  | -1.29687026 | C  | 0.00000000  | -0.67840452 | -2.61720867 |
| N | 0.00000000  | -1.08997609 | -1.29687026 | H  | -1.30647028 | -4.22661656 | -0.90460926 |
| C | 0.00000000  | 0.67840452  | -2.61720867 | H  | 0.00000000  | 1.37452430  | -3.43851773 |
| C | 0.00000000  | -2.51581126 | -0.85316356 | H  | 0.00000000  | -1.37452430 | -3.43851773 |
| H | 0.00000000  | -2.45974325 | 0.23760677  | H  | 0.00000000  | 2.45974325  | 0.23760677  |
| C | -1.27819166 | -3.21529150 | -1.31476072 | C  | -1.27819166 | 3.21529150  | -1.31476072 |
| H | -1.32432764 | -3.30375218 | -2.40305065 | H  | -2.17096235 | 2.68730706  | -0.97351422 |
| H | -2.17096235 | -2.68730706 | -0.97351422 | H  | -1.30647028 | 4.22661656  | -0.90460926 |
| C | 1.27819166  | -3.21529150 | -1.31476072 | H  | -1.32432764 | 3.30375218  | -2.40305065 |
| H | 2.17096235  | -2.68730706 | -0.97351422 | C  | 1.27819166  | 3.21529150  | -1.31476072 |
| H | 1.30647028  | -4.22661656 | -0.90460926 | H  | 1.32432764  | 3.30375218  | -2.40305065 |
| H | 1.32432764  | -3.30375218 | -2.40305065 | H  | 1.30647028  | 4.22661656  | -0.90460926 |
| C | 0.00000000  | 0.00000000  | -0.50257310 | H  | 2.17096235  | 2.68730706  | -0.97351422 |
| C | 0.00000000  | 2.51581126  | -0.85316356 | Au | 0.00000000  | 0.00000000  | 1.49236538  |

$BIiPr-Au^+$

|   |             |             |             |   |             |             |             |
|---|-------------|-------------|-------------|---|-------------|-------------|-------------|
| N | 0.00000000  | 1.10421973  | -0.68982035 | H | 1.35557358  | -3.41707657 | -1.64626259 |
| N | 0.00000000  | -1.10421973 | -0.68982035 | C | 0.00000000  | -0.70279989 | -4.40951800 |
| C | 0.00000000  | -1.42694950 | -3.22728119 | H | 0.00000000  | -1.23377763 | -5.35435072 |
| H | 0.00000000  | -2.50750410 | -3.24748212 | C | 0.00000000  | 0.00000000  | 0.08131473  |
| C | 0.00000000  | 0.70203993  | -2.03198323 | C | 0.00000000  | 2.50761352  | -0.17887193 |
| C | 0.00000000  | 1.42694950  | -3.22728119 | C | 0.00000000  | -0.70203993 | -2.03198323 |
| H | 0.00000000  | 2.50750410  | -3.24748212 | H | -1.30779470 | -4.21173465 | -0.07730658 |
| C | 0.00000000  | -2.50761352 | -0.17887193 | H | 0.00000000  | 2.38876058  | 0.90701225  |
| H | 0.00000000  | -2.38876058 | 0.90701225  | C | 1.28454060  | 3.23883635  | -0.57256575 |
| C | -1.28454060 | -3.23883635 | -0.57256575 | H | 1.35557358  | 3.41707657  | -1.64626259 |

|   |             |             |             |    |             |            |             |
|---|-------------|-------------|-------------|----|-------------|------------|-------------|
| H | -1.35557358 | -3.41707657 | -1.64626259 | H  | 1.30779470  | 4.21173465 | -0.07730658 |
| H | -2.17035413 | -2.68196227 | -0.25989719 | H  | 2.17035413  | 2.68196227 | -0.25989719 |
| C | 0.00000000  | 0.70279989  | -4.40951800 | C  | -1.28454060 | 3.23883635 | -0.57256575 |
| H | 0.00000000  | 1.23377763  | -5.35435072 | H  | -2.17035413 | 2.68196227 | -0.25989719 |
| C | 1.28454060  | -3.23883635 | -0.57256575 | H  | -1.30779470 | 4.21173465 | -0.07730658 |
| H | 2.17035413  | -2.68196227 | -0.25989719 | H  | -1.35557358 | 3.41707657 | -1.64626259 |
| H | 1.30779470  | -4.21173465 | -0.07730658 | Au | 0.00000000  | 0.00000000 | 2.08109536  |

**1b-Au<sup>+</sup>**

|   |             |             |             |    |             |             |             |
|---|-------------|-------------|-------------|----|-------------|-------------|-------------|
| N | 0.00000000  | 1.10421973  | -0.68982035 | H  | 1.35557358  | -3.41707657 | -1.64626259 |
| N | 0.00000000  | -1.10421973 | -0.68982035 | C  | 0.00000000  | -0.70279989 | -4.40951800 |
| C | 0.00000000  | -1.42694950 | -3.22728119 | H  | 0.00000000  | -1.23377763 | -5.35435072 |
| H | 0.00000000  | -2.50750410 | -3.24748212 | C  | 0.00000000  | 0.00000000  | 0.08131473  |
| C | 0.00000000  | 0.70203993  | -2.03198323 | C  | 0.00000000  | 2.50761352  | -0.17887193 |
| C | 0.00000000  | 1.42694950  | -3.22728119 | C  | 0.00000000  | -0.70203993 | -2.03198323 |
| H | 0.00000000  | 2.50750410  | -3.24748212 | H  | -1.30779470 | -4.21173465 | -0.07730658 |
| C | 0.00000000  | -2.50761352 | -0.17887193 | H  | 0.00000000  | 2.38876058  | 0.90701225  |
| H | 0.00000000  | -2.38876058 | 0.90701225  | C  | 1.28454060  | 3.23883635  | -0.57256575 |
| C | -1.28454060 | -3.23883635 | -0.57256575 | H  | 1.35557358  | 3.41707657  | -1.64626259 |
| H | -1.35557358 | -3.41707657 | -1.64626259 | H  | 1.30779470  | 4.21173465  | -0.07730658 |
| H | -2.17035413 | -2.68196227 | -0.25989719 | H  | 2.17035413  | 2.68196227  | -0.25989719 |
| C | 0.00000000  | 0.70279989  | -4.40951800 | C  | -1.28454060 | 3.23883635  | -0.57256575 |
| H | 0.00000000  | 1.23377763  | -5.35435072 | H  | -2.17035413 | 2.68196227  | -0.25989719 |
| C | 1.28454060  | -3.23883635 | -0.57256575 | H  | -1.30779470 | 4.21173465  | -0.07730658 |
| H | 2.17035413  | -2.68196227 | -0.25989719 | H  | -1.35557358 | 3.41707657  | -1.64626259 |
| H | 1.30779470  | -4.21173465 | -0.07730658 | Au | 0.00000000  | 0.00000000  | 2.08109536  |

**1d-Au<sup>+</sup>**

|   |             |             |            |    |             |             |             |
|---|-------------|-------------|------------|----|-------------|-------------|-------------|
| N | 1.41302961  | 0.37022146  | 0.00000000 | H  | -1.37473322 | 2.94186452  | 2.17122679  |
| N | -0.06841926 | 1.97093275  | 0.00000000 | C  | -1.47572025 | 3.56269350  | -1.27870824 |
| N | 3.44820738  | -0.73311334 | 0.00000000 | H  | -1.37473322 | 2.94186452  | -2.17122679 |
| C | 2.10342352  | 1.57936289  | 0.00000000 | H  | -2.45750643 | 4.03928763  | -1.30759215 |
| C | 1.51205682  | -2.13779680 | 0.00000000 | H  | -0.72667752 | 4.35695872  | -1.32448619 |
| H | 0.43689855  | -2.25094744 | 0.00000000 | C  | 4.22357614  | -1.81931287 | 0.00000000  |
| C | 2.32890925  | -3.26605726 | 0.00000000 | H  | 5.29342500  | -1.63800130 | 0.00000000  |
| H | 1.88066556  | -4.25323391 | 0.00000000 | C  | 0.07773448  | 0.63295422  | 0.00000000  |
| C | 3.71069557  | -3.11338250 | 0.00000000 | C  | 2.13432261  | -0.89415053 | 0.00000000  |
| H | 4.37447534  | -3.96934100 | 0.00000000 | C  | 1.18129591  | 2.56686166  | 0.00000000  |
| C | -1.35294599 | 2.73427837  | 0.00000000 | H  | -2.45750643 | 4.03928763  | 1.30759215  |
| H | -2.12857133 | 1.96550434  | 0.00000000 | H  | 3.17769846  | 1.59755825  | 0.00000000  |
| C | -1.47572025 | 3.56269350  | 1.27870824 | H  | 1.30965120  | 3.63553206  | 0.00000000  |
| H | -0.72667752 | 4.35695872  | 1.32448619 | Au | -1.47572025 | -0.62618283 | 0.00000000  |

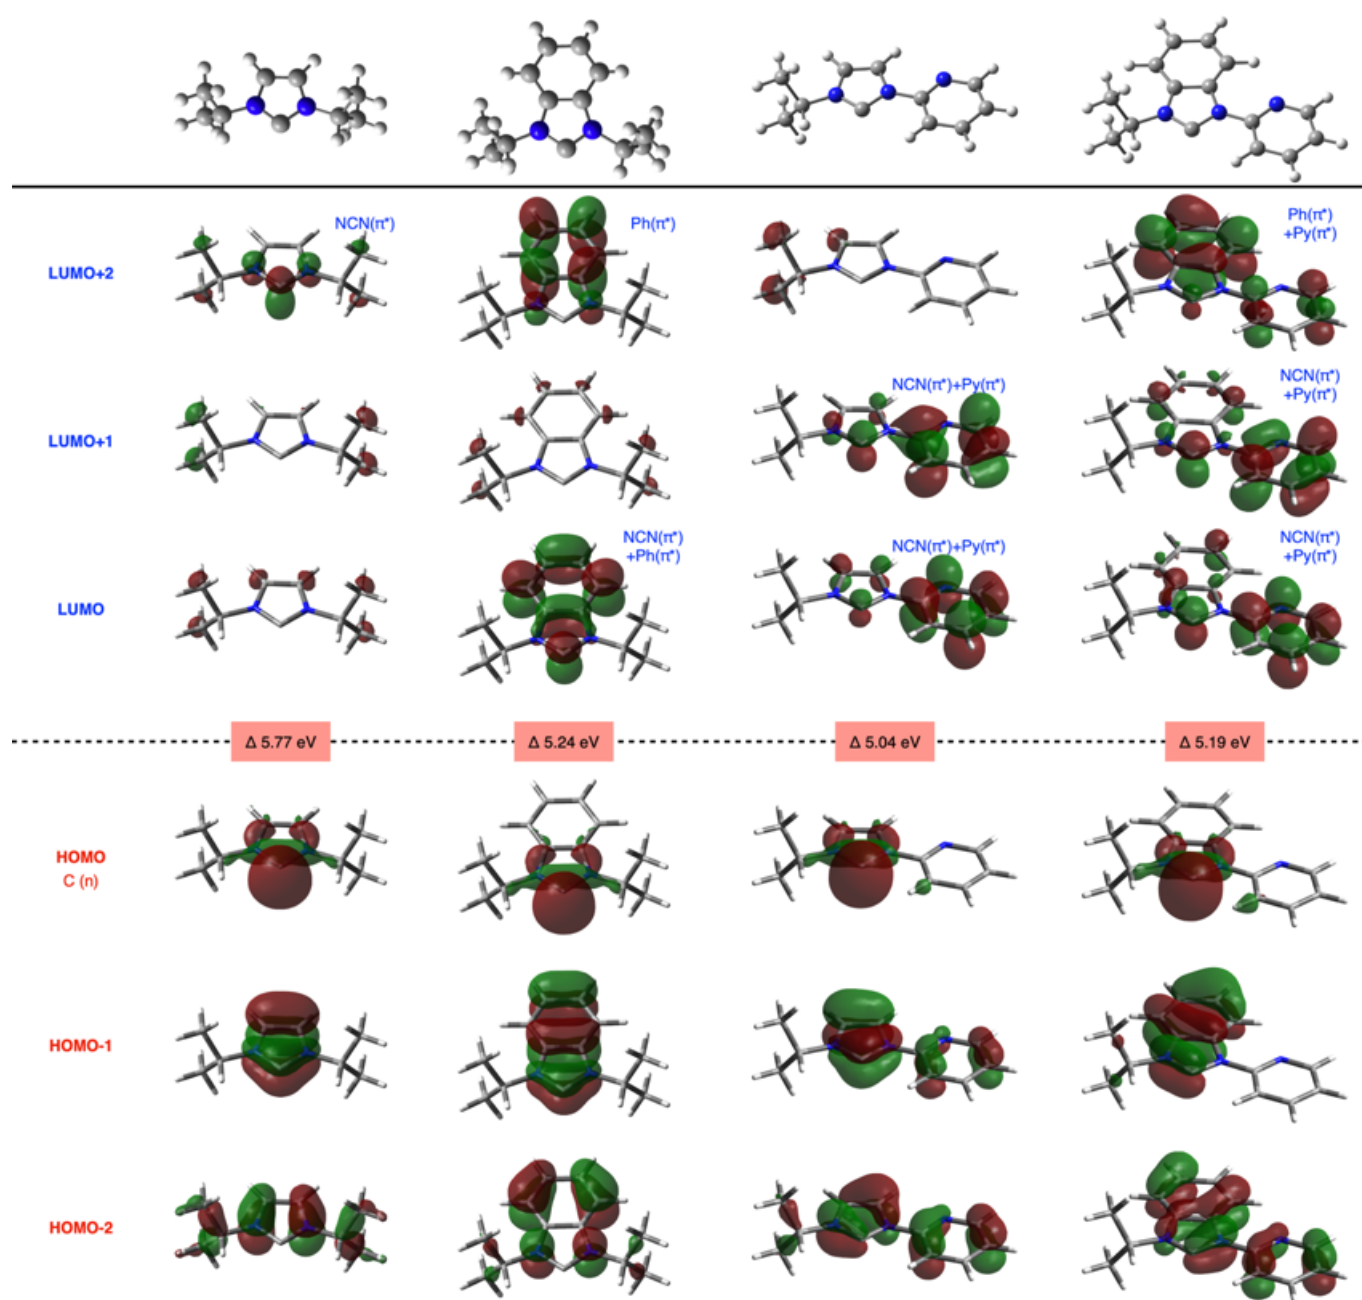

Supplementary Figure 32. Calculated frontier orbitals of ligands *IiPr*, *BIiPr*, **1d** and **1b** (isovalue =  $|0.04|$ )

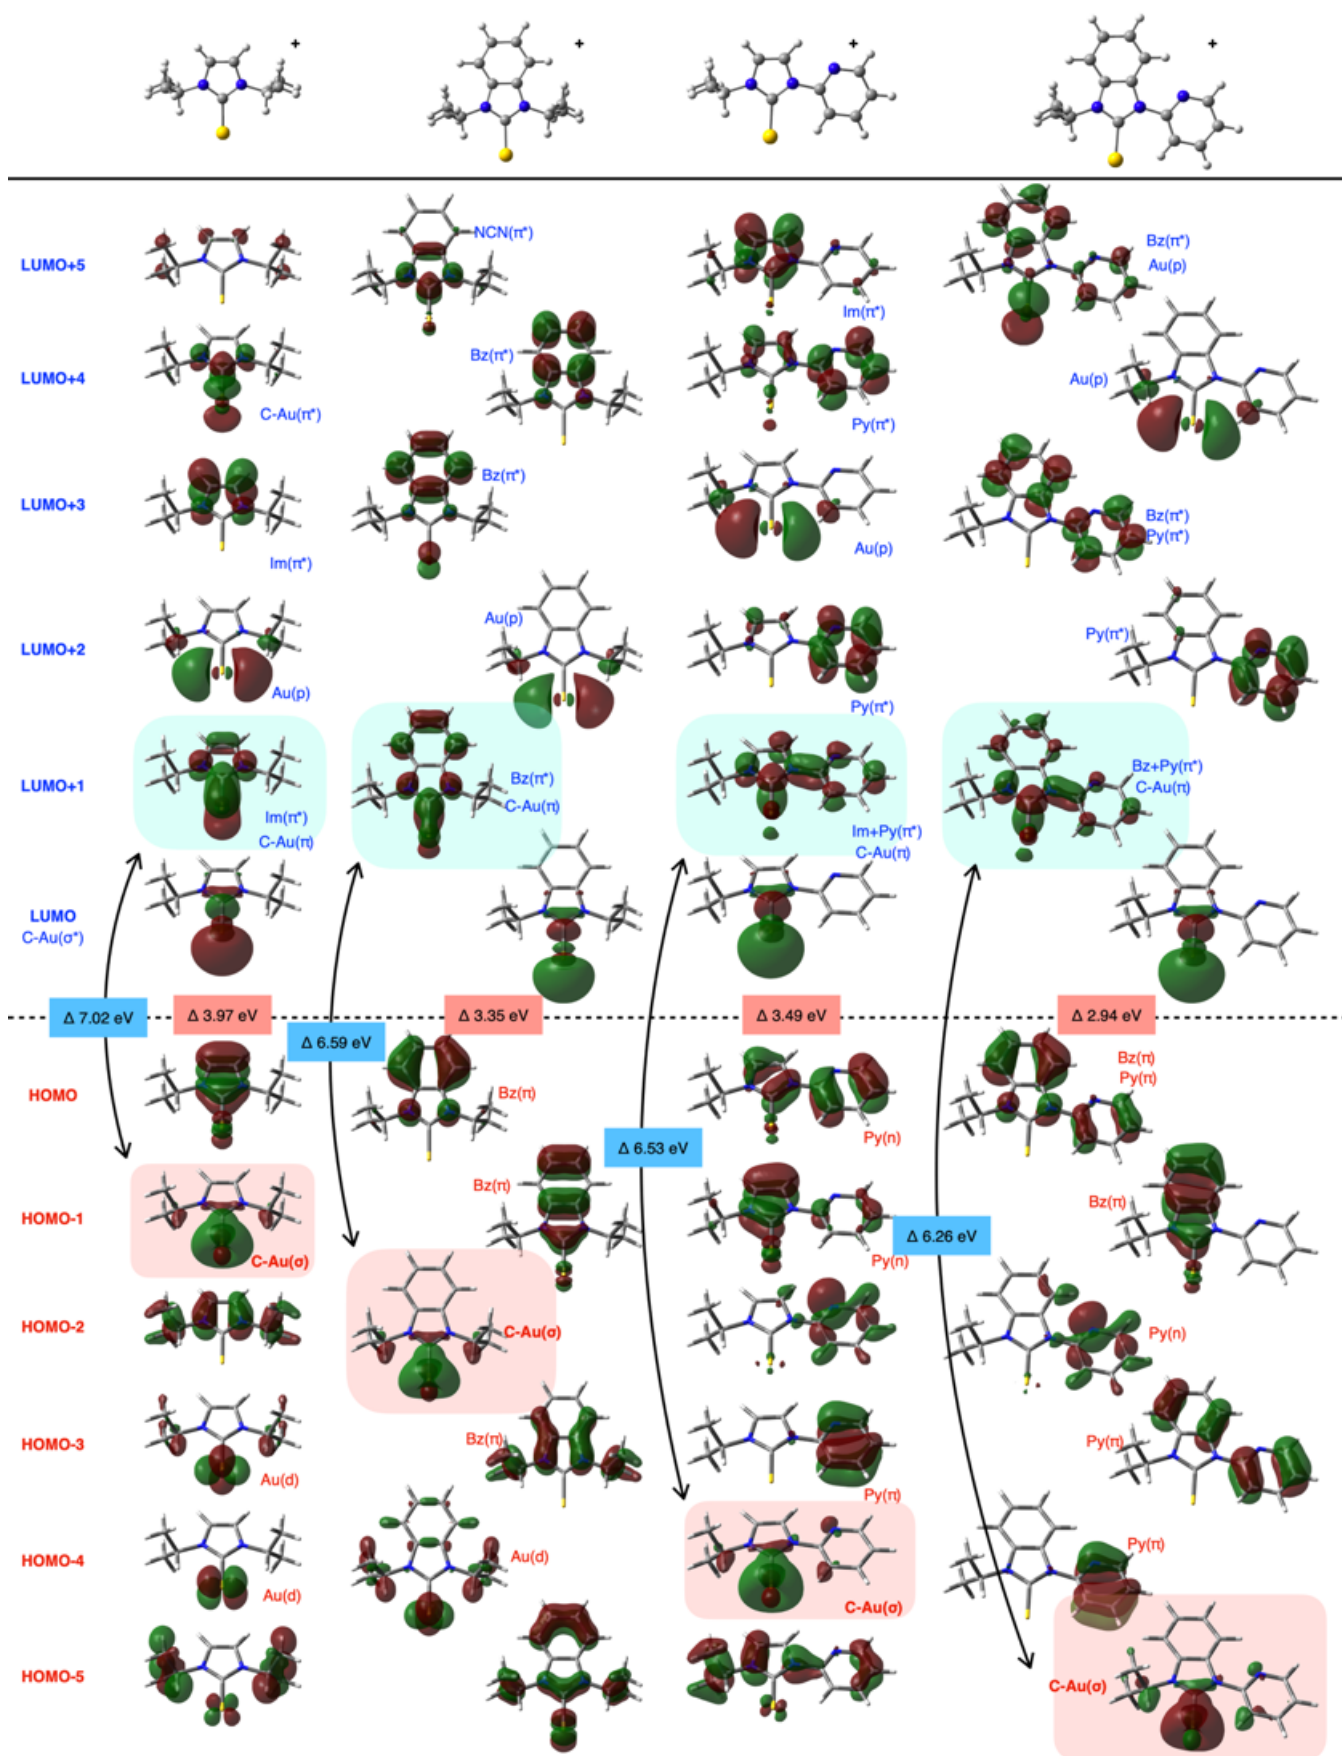

Supplementary Figure 33. Calculated frontier orbitals of  $IiPr-Au^+$ ,  $BIiPr-Au^+$ ,  $1d-Au^+$  and  $1b-Au^+$  (isovalue =  $|0.04|$ )

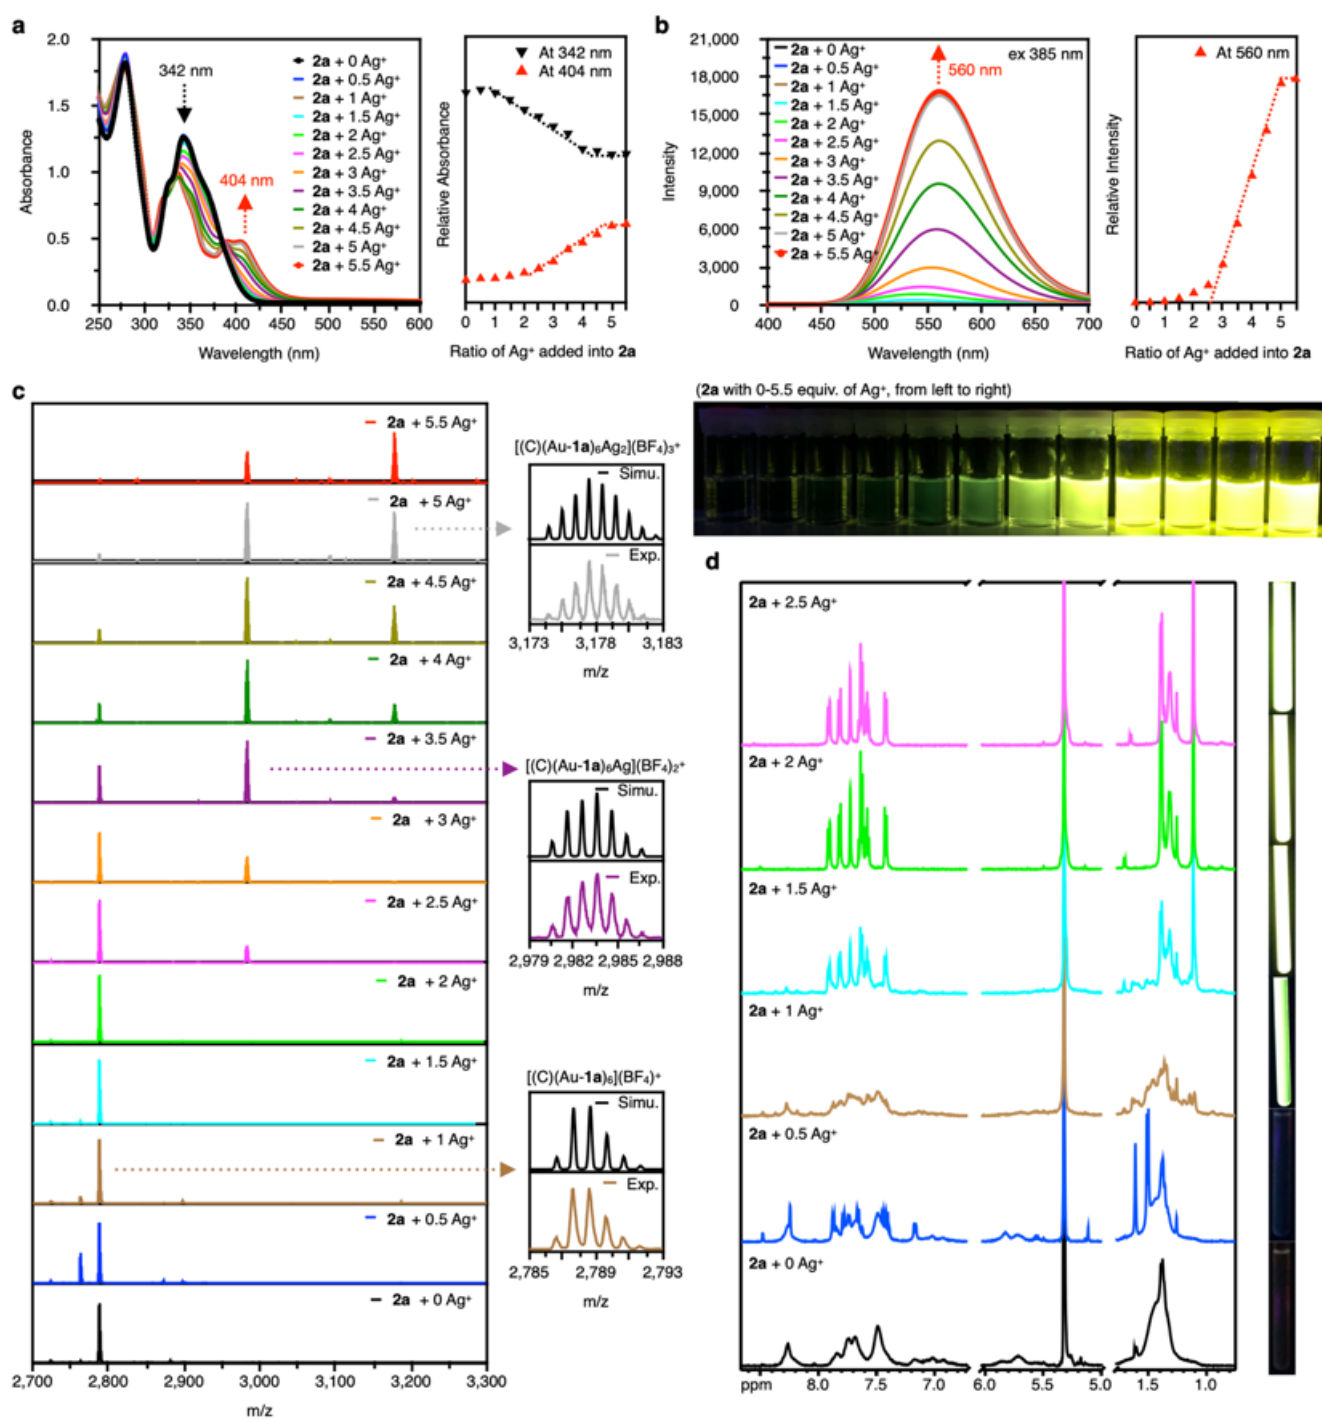

Supplementary Figure 34. Complexation of **2a** with AgBF<sub>4</sub>. **a**, UV-vis spectra of **2a** (3.3 × 10<sup>-5</sup> mol/L) with 0–5.5 equiv. of AgBF<sub>4</sub> in CH<sub>2</sub>Cl<sub>2</sub>/CH<sub>3</sub>OH (9:1, v:v, 293 K), and plots of absorbance at 342 and 404 nm against the ratio of Ag<sup>+</sup> added. **b**, Emission spectra and photos of luminescence of **2a** (3.3 × 10<sup>-5</sup> mol/L) with 0–5.5 equiv. of AgBF<sub>4</sub> in CH<sub>2</sub>Cl<sub>2</sub>/CH<sub>3</sub>OH (9:1, v:v, 293 K), and plots of emission intensity at 560 nm vs ratio of Ag<sup>+</sup> added (ex = 385 nm, iso-absorption point in **a**). **c**, MS spectra of **2a** (3.3 × 10<sup>-5</sup> mol/L) with 0–5.5 equiv. of AgBF<sub>4</sub> in CH<sub>2</sub>Cl<sub>2</sub>/CH<sub>3</sub>OH (9:1, v:v), and enlarged experimental and simulated patterns (Ion mode: positive; desolvation temperature: 150 °C; source temperature: 80 °C). **d**, <sup>1</sup>H NMR spectra and photos of luminescence of **2a** with 0–2.5 equiv. of AgBF<sub>4</sub> in CD<sub>2</sub>Cl<sub>2</sub>/CD<sub>3</sub>OD (500 MHz, 9:1, v:v, 300 K). The solution was diluted from 2.5 × 10<sup>-3</sup> mol/L to 1.5 × 10<sup>-3</sup> mol/L in the process.



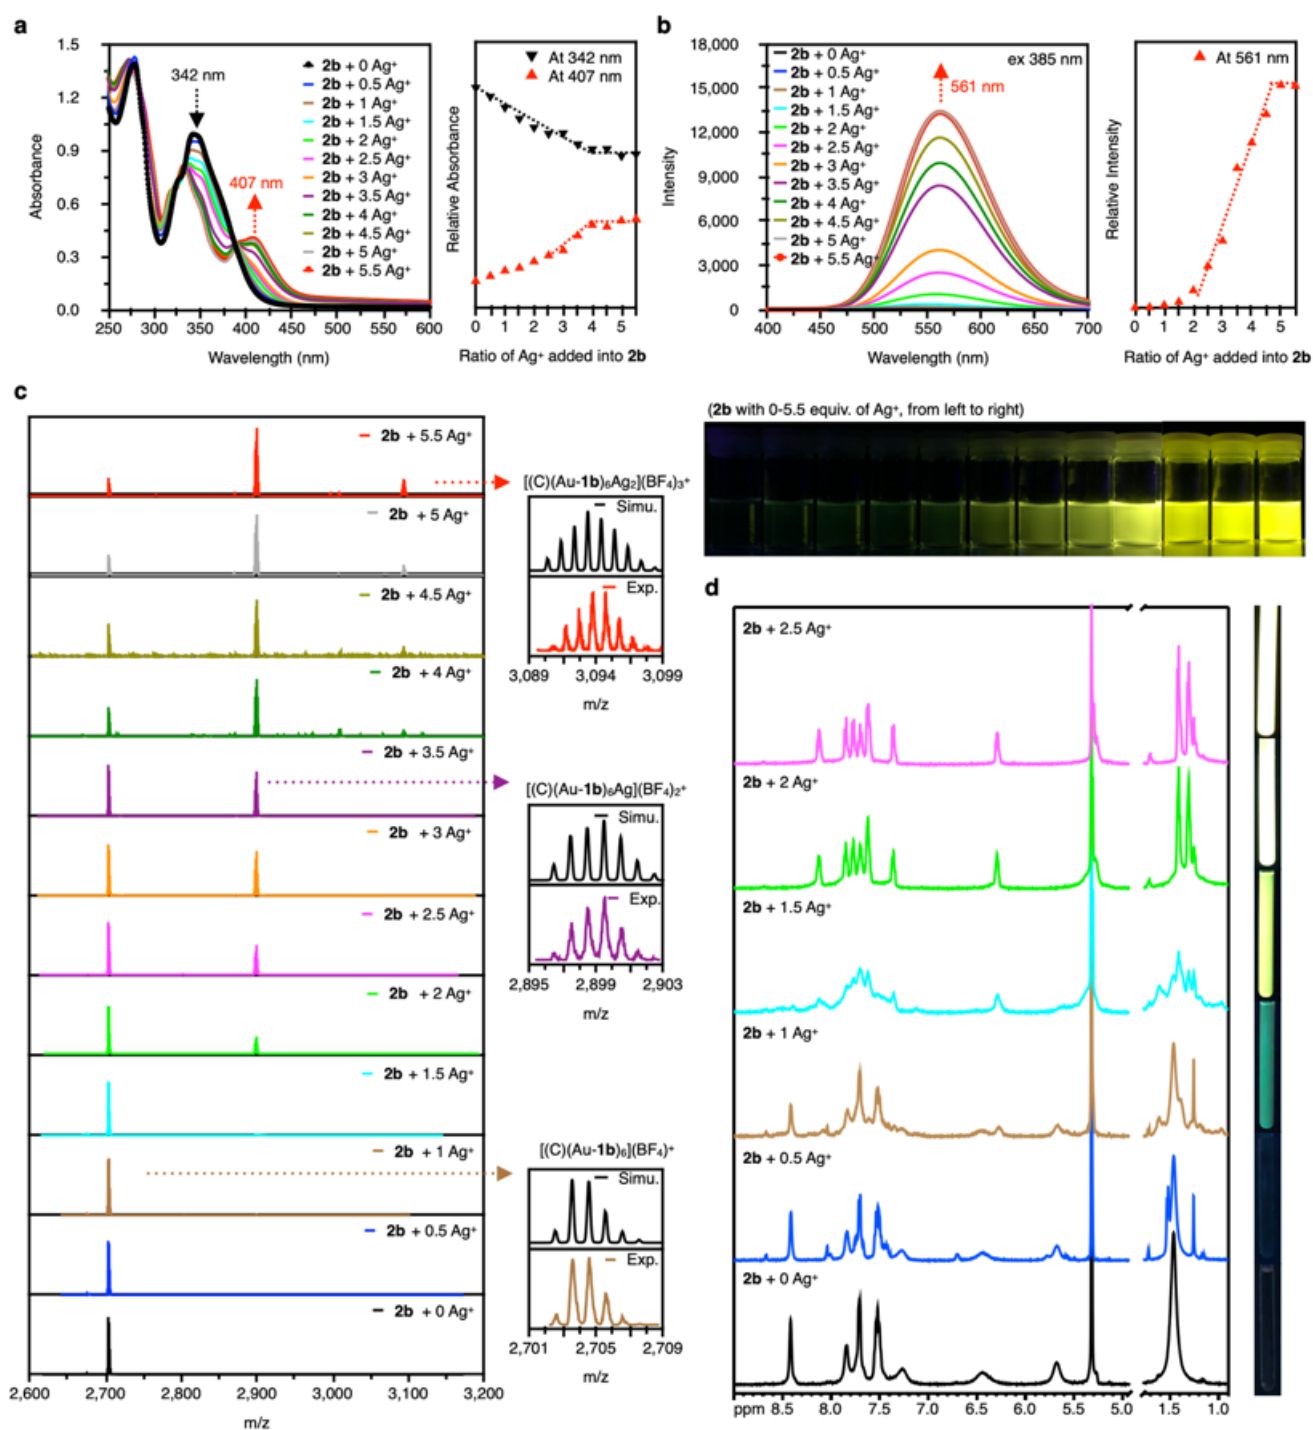

Supplementary Figure 35. Complexation of **2b** with  $\text{AgBF}_4$ . **a**, UV-vis spectra of **2b** ( $3.3 \times 10^{-5}$  mol/L) with 0–5.5 equiv. of  $\text{AgBF}_4$  in  $\text{CH}_2\text{Cl}_2/\text{CH}_3\text{OH}$  (9:1, v:v, 293 K), and plots of absorbance at 342 and 407 nm vs ratio of  $\text{Ag}^+$  added. **b**, Emission spectra and photos of luminescence of **2b** ( $3.3 \times 10^{-5}$  mol/L) with 0–5.5 equiv. of  $\text{AgBF}_4$  in  $\text{CH}_2\text{Cl}_2/\text{CH}_3\text{OH}$  (9:1, v:v, 293 K), and plots of emission intensity at 561 nm vs ratio of  $\text{Ag}^+$  added (ex = 385 nm, iso-absorption point in **a**). **c**, MS spectra of **2b** ( $3.3 \times 10^{-5}$  mol/L) with 0–5.5 equiv. of  $\text{AgBF}_4$  in  $\text{CH}_2\text{Cl}_2/\text{CH}_3\text{OH}$  (9:1, v:v), and enlarged experimental and simulated patterns (Ion mode: positive; desolvation temperature: 150 °C; source temperature: 80 °C). **d**,  $^1\text{H}$  NMR spectra and photos of luminescence of **2b** with 0–2.5 equiv. of  $\text{AgBF}_4$  in  $\text{CD}_2\text{Cl}_2/\text{CD}_3\text{OD}$  (500 MHz, 9:1, v:v, 300 K). The solution was diluted from  $2.5 \times 10^{-3}$  mol/L to  $1.5 \times 10^{-3}$  mol/L in the process.

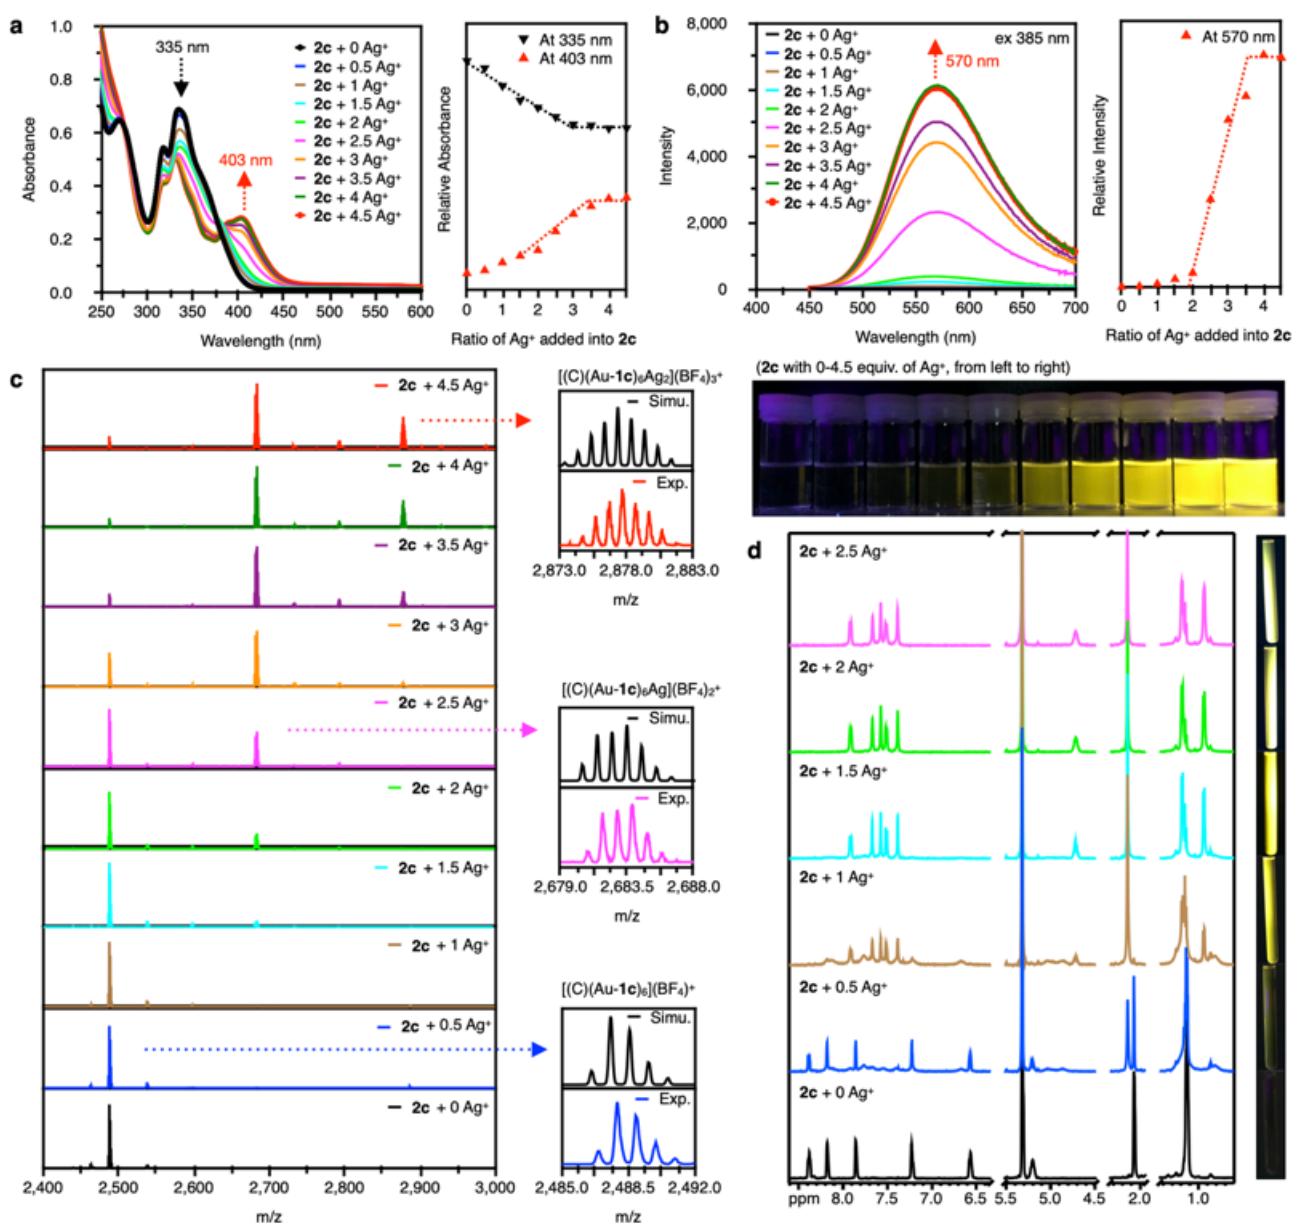

Supplementary Figure 36. Complexation of **2c** with  $\text{AgBF}_4$ . **a**, UV-vis spectra of **2c** ( $3.3 \times 10^{-5}$  mol/L) with 0–4.5 equiv. of  $\text{AgBF}_4$  in  $\text{CH}_2\text{Cl}_2/\text{CH}_3\text{OH}$  (9:1, v:v, 293 K), and plots of absorbance at 335 and 403 nm vs ratio of  $\text{Ag}^+$  added. **b**, Emission spectra and photos of luminescence of **2c** ( $3.3 \times 10^{-5}$  mol/L) with 0–4.5 equiv. of  $\text{AgBF}_4$  in  $\text{CH}_2\text{Cl}_2/\text{CH}_3\text{OH}$  (9:1, v:v, 293 K), and plots of emission intensity at 570 nm vs ratio of  $\text{Ag}^+$  added (ex = 385 nm, iso-absorption point in **a**). **c**, MS spectra of **2c** ( $3.3 \times 10^{-5}$  mol/L) with 0–4.5 equiv. of  $\text{AgBF}_4$  in  $\text{CH}_2\text{Cl}_2/\text{CH}_3\text{OH}$  (9:1, v:v), and enlarged experimental and simulated patterns (Ion mode: positive; desolvation temperature: 150 °C; source temperature: 80 °C). **d**,  $^1\text{H}$  NMR spectra and photos of luminescence of **2c** with 0–2.5 equiv. of  $\text{AgBF}_4$  in  $\text{CD}_2\text{Cl}_2/\text{CD}_3\text{OD}$  (500 MHz, 3:1, v:v, 300 K). The solution was diluted from  $2.5 \times 10^{-3}$  mol/L to  $1.5 \times 10^{-3}$  mol/L in the process.

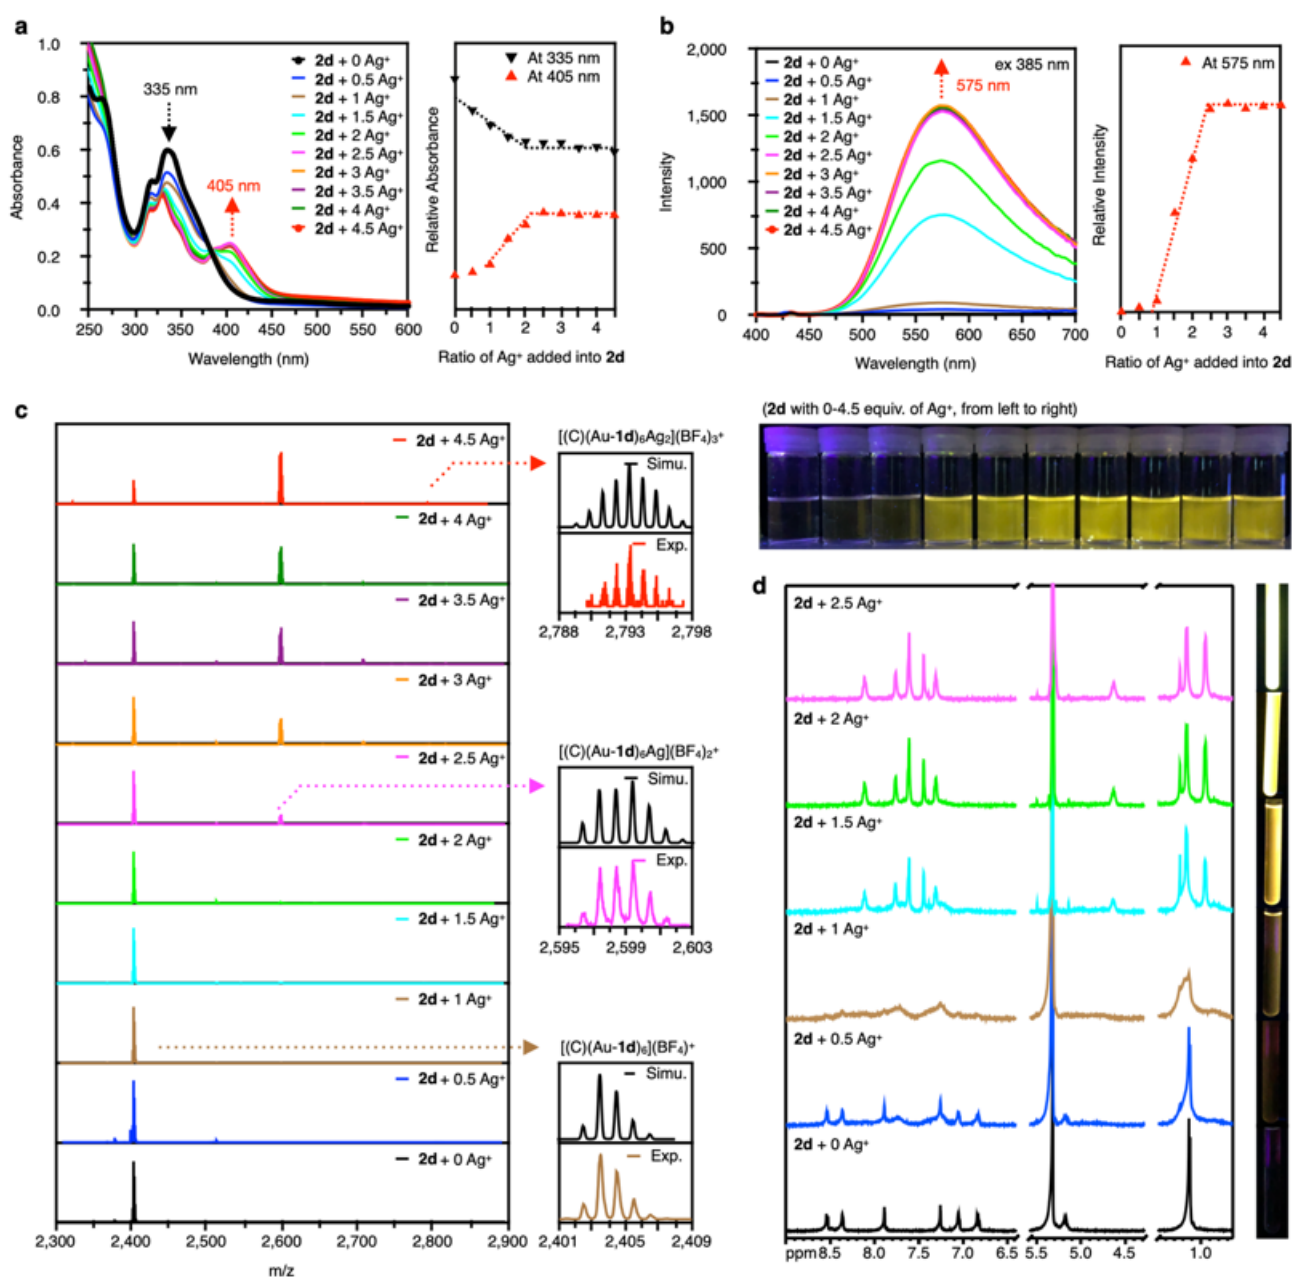

Supplementary Figure 37. Complexation of **2d** with  $\text{AgBF}_4$ . **a**, UV-vis spectra of **2d** ( $3.3 \times 10^{-5}$  mol/L) with 0–4.5 equiv. of  $\text{AgBF}_4$  in  $\text{CH}_2\text{Cl}_2/\text{CH}_3\text{OH}$  (9:1, v:v, 293 K), and plots of absorbance at 335 and 403 nm vs ratio of  $\text{Ag}^+$  added. **b**, Emission spectra and photos of luminescence of **2d** ( $3.3 \times 10^{-5}$  mol/L) with 0–4.5 equiv. of  $\text{AgBF}_4$  in  $\text{CH}_2\text{Cl}_2/\text{CH}_3\text{OH}$  (9:1, v:v, 293 K), and plots of emission intensity at 575 nm vs ratio of  $\text{Ag}^+$  added (ex = 385 nm, iso-absorption point in **a**). **c**, MS spectra of **2d** ( $3.3 \times 10^{-5}$  mol/L) with 0–4.5 equiv. of  $\text{AgBF}_4$  in  $\text{CH}_2\text{Cl}_2/\text{CH}_3\text{OH}$  (9:1, v:v), and enlarged experimental and simulated patterns (Ion mode: positive; desolvation temperature: 150 °C; source temperature: 80 °C). **d**,  $^1\text{H}$  NMR spectra and photos of luminescence of **2d** with 0–2.5 equiv. of  $\text{AgBF}_4$  in  $\text{CD}_2\text{Cl}_2/\text{CD}_3\text{OD}$  (500 MHz, 3:1, v:v, 300 K). The solution was diluted from  $2.5 \times 10^{-4}$  mol/L to  $2.0 \times 10^{-4}$  mol/L in the process.

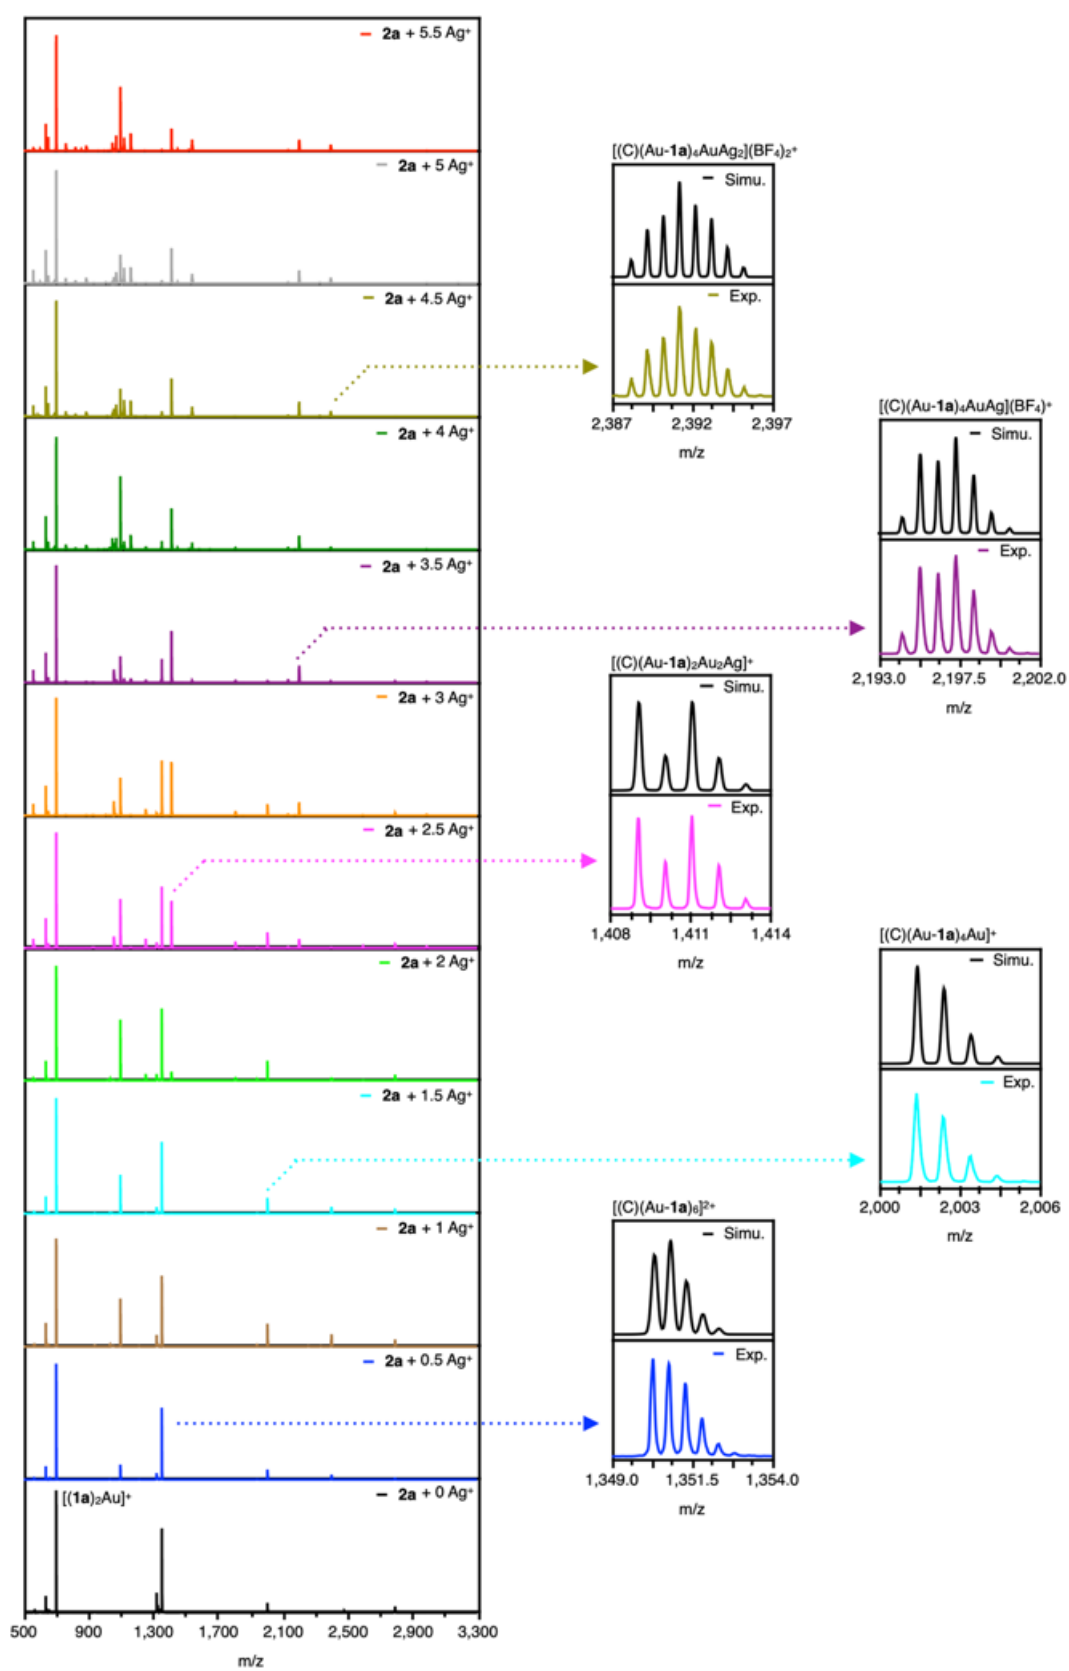

Supplementary Figure 38. Full MS spectra of complexation of **2a** with  $\text{AgBF}_4$  ( $\text{CH}_2\text{Cl}_2/\text{CH}_3\text{OH} = 9:1$ , v:v)

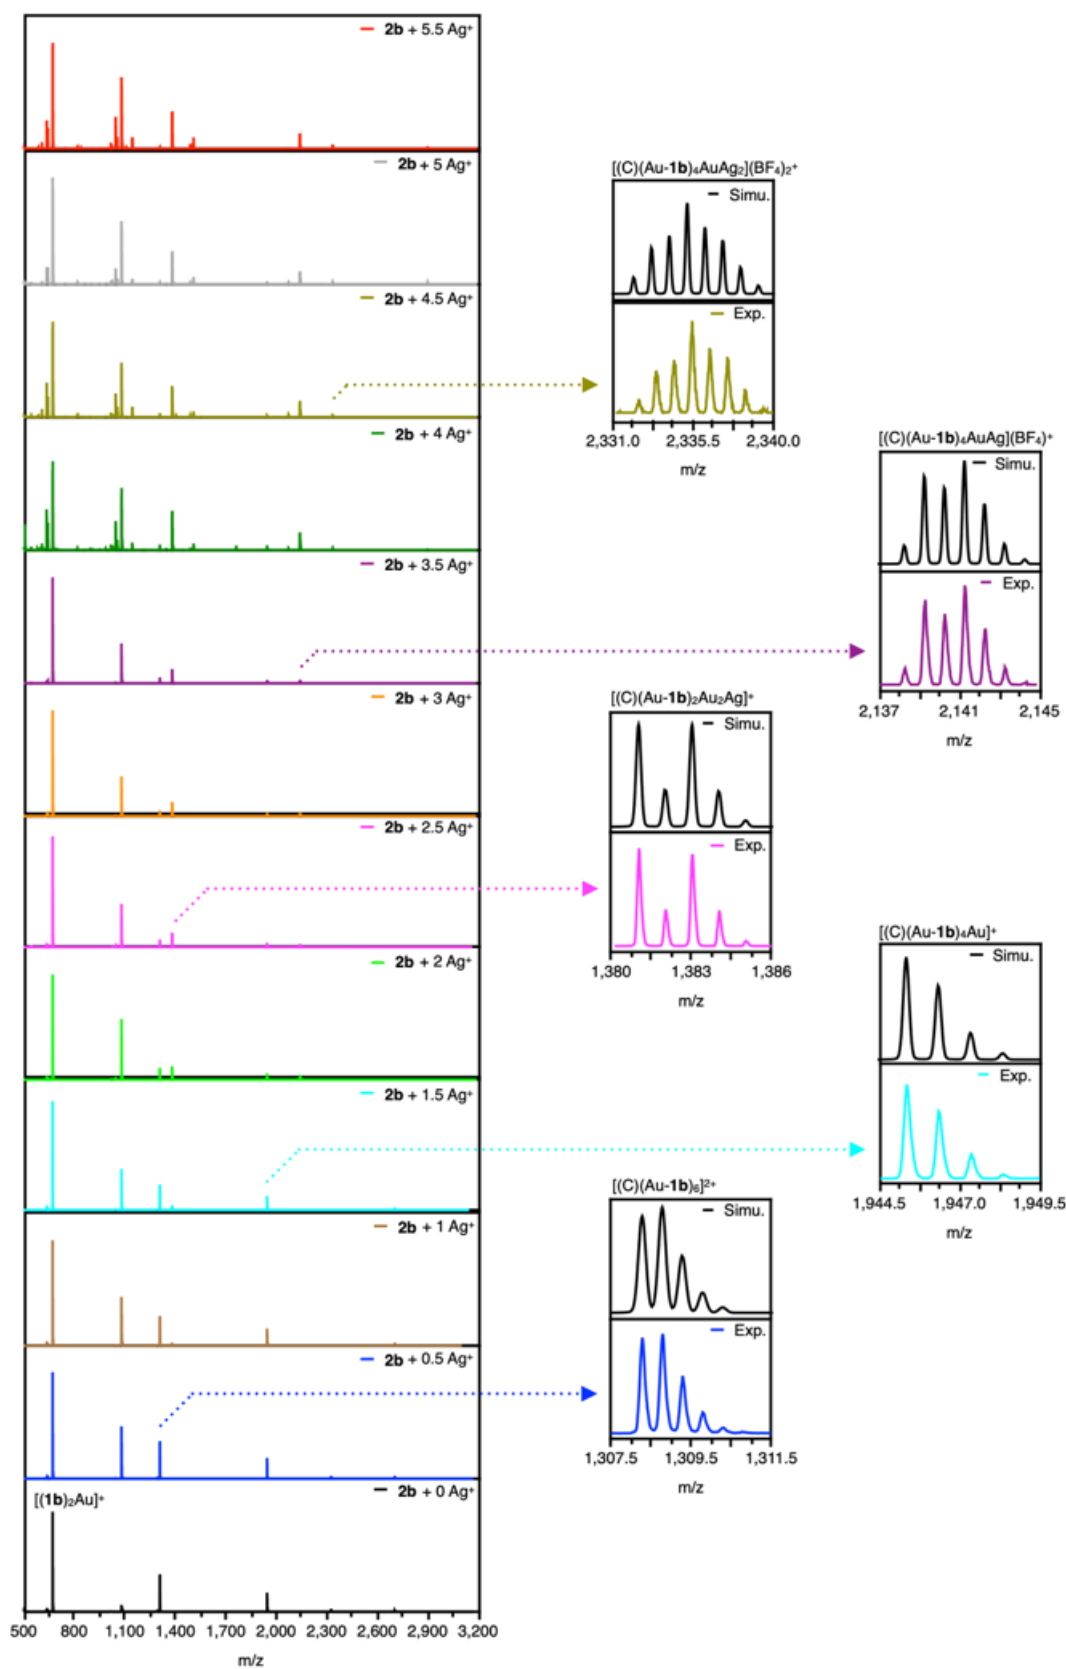

Supplementary Figure 39. Full MS spectra of complexation of **2b** with  $\text{AgBF}_4$  ( $\text{CH}_2\text{Cl}_2/\text{CH}_3\text{OH} = 9:1, v:v$ )

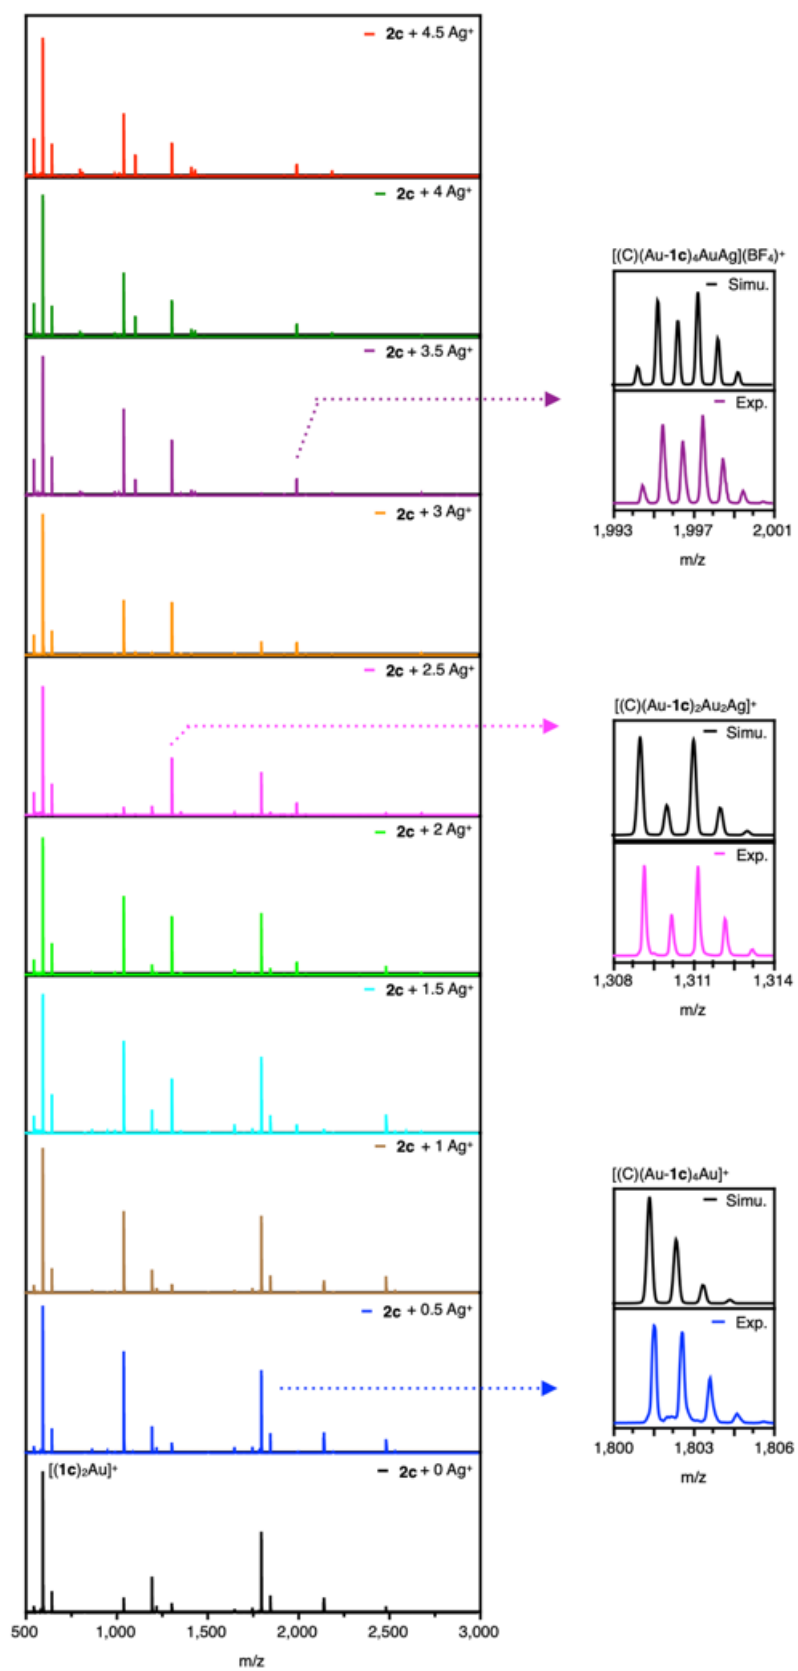

Supplementary Figure 40. Full MS spectra of complexation of **2c** with  $\text{AgBF}_4$  ( $\text{CH}_2\text{Cl}_2/\text{CH}_3\text{OH} = 9:1, \text{v:v}$ )

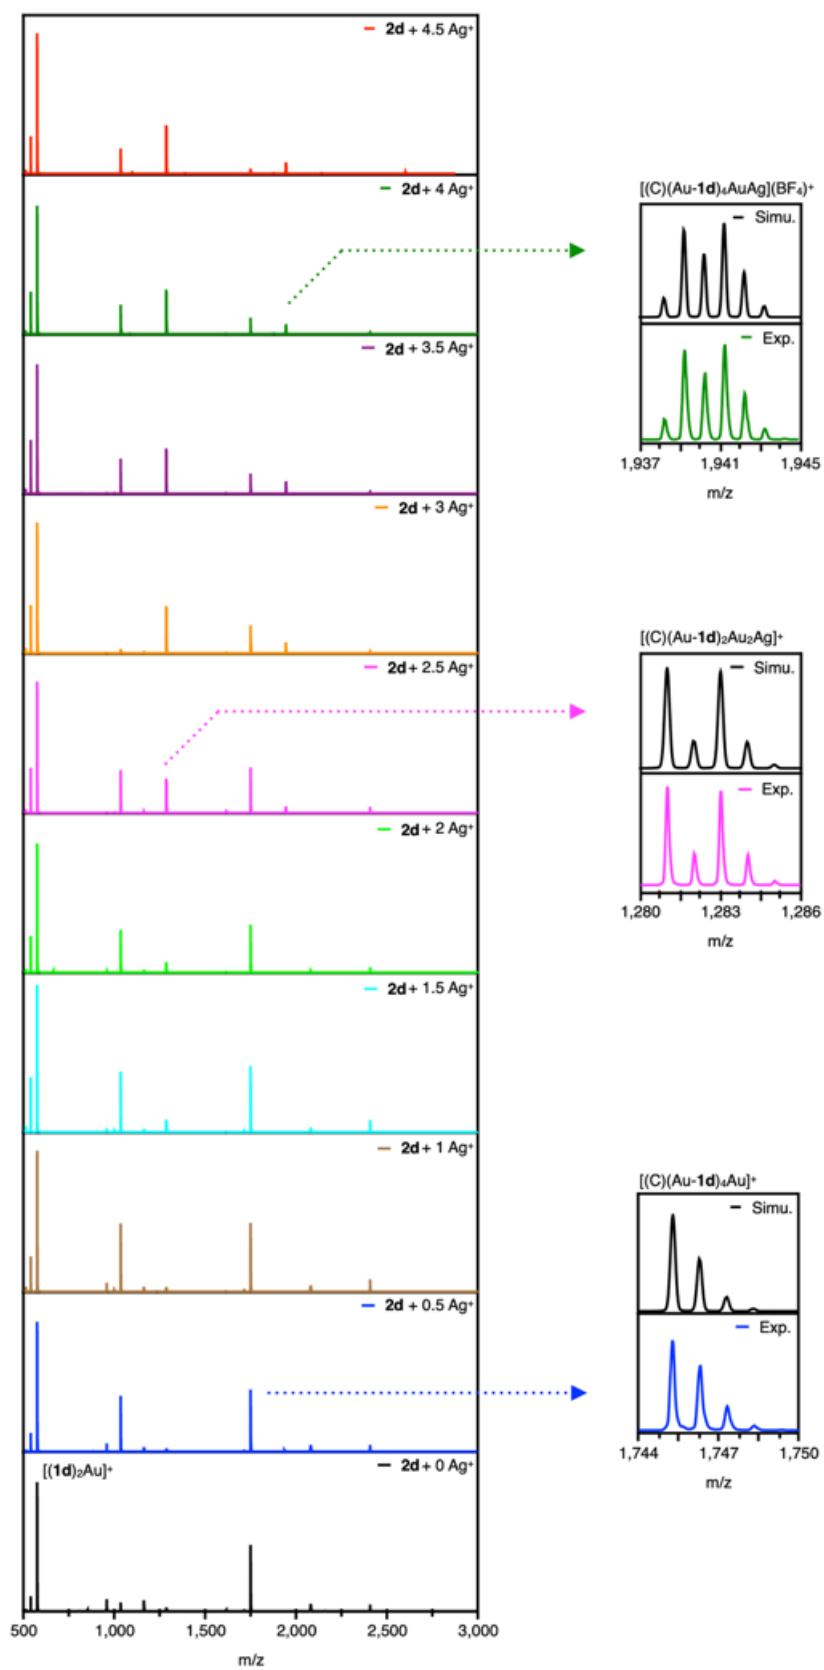

Supplementary Figure 41. Full MS spectra of complexation of **2d** with  $\text{AgBF}_4$  ( $\text{CH}_2\text{Cl}_2/\text{CH}_3\text{OH} = 9:1$ , v:v)

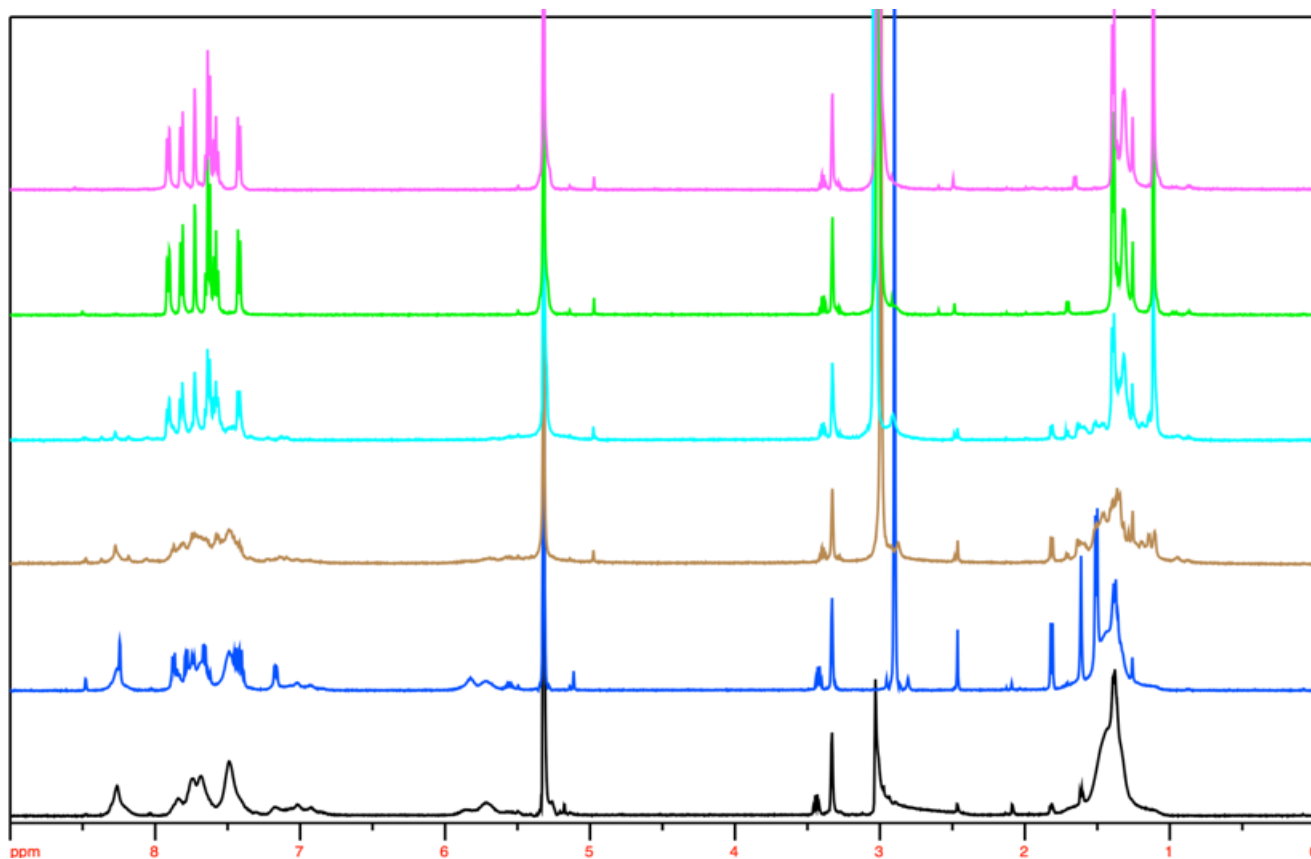

Supplementary Figure 42. Full <sup>1</sup>H NMR spectra of complexation of **2a** with AgBF<sub>4</sub> (0–2.5 equiv. from bottom to top; 500 MHz, CD<sub>2</sub>Cl<sub>2</sub>/CD<sub>3</sub>OD = 9:1, v:v, 300 K)

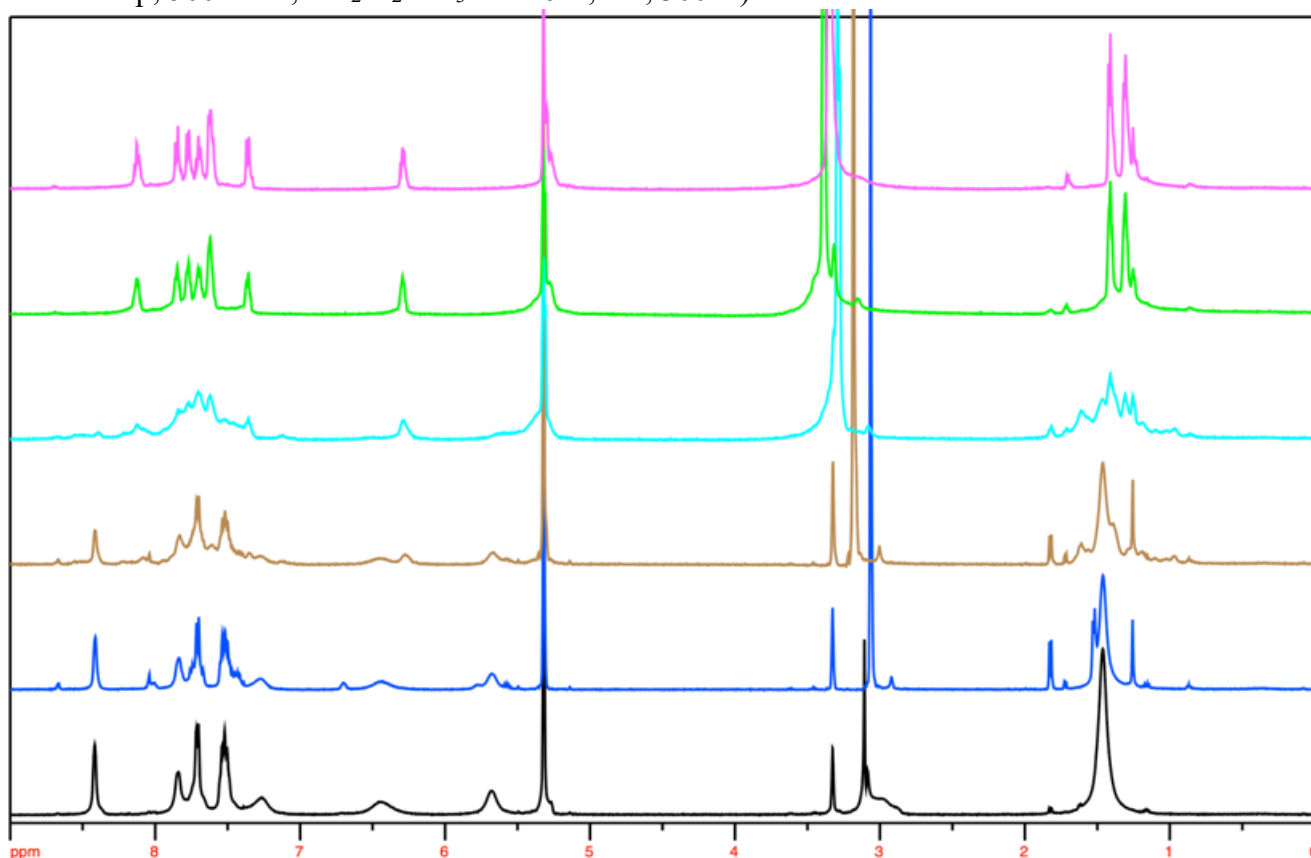

Supplementary Figure 43. Full <sup>1</sup>H NMR spectra of complexation of **2b** with AgBF<sub>4</sub> (0–2.5 equiv. from bottom to top; 500 MHz, CD<sub>2</sub>Cl<sub>2</sub>/CD<sub>3</sub>OD = 9:1, v:v, 300 K)



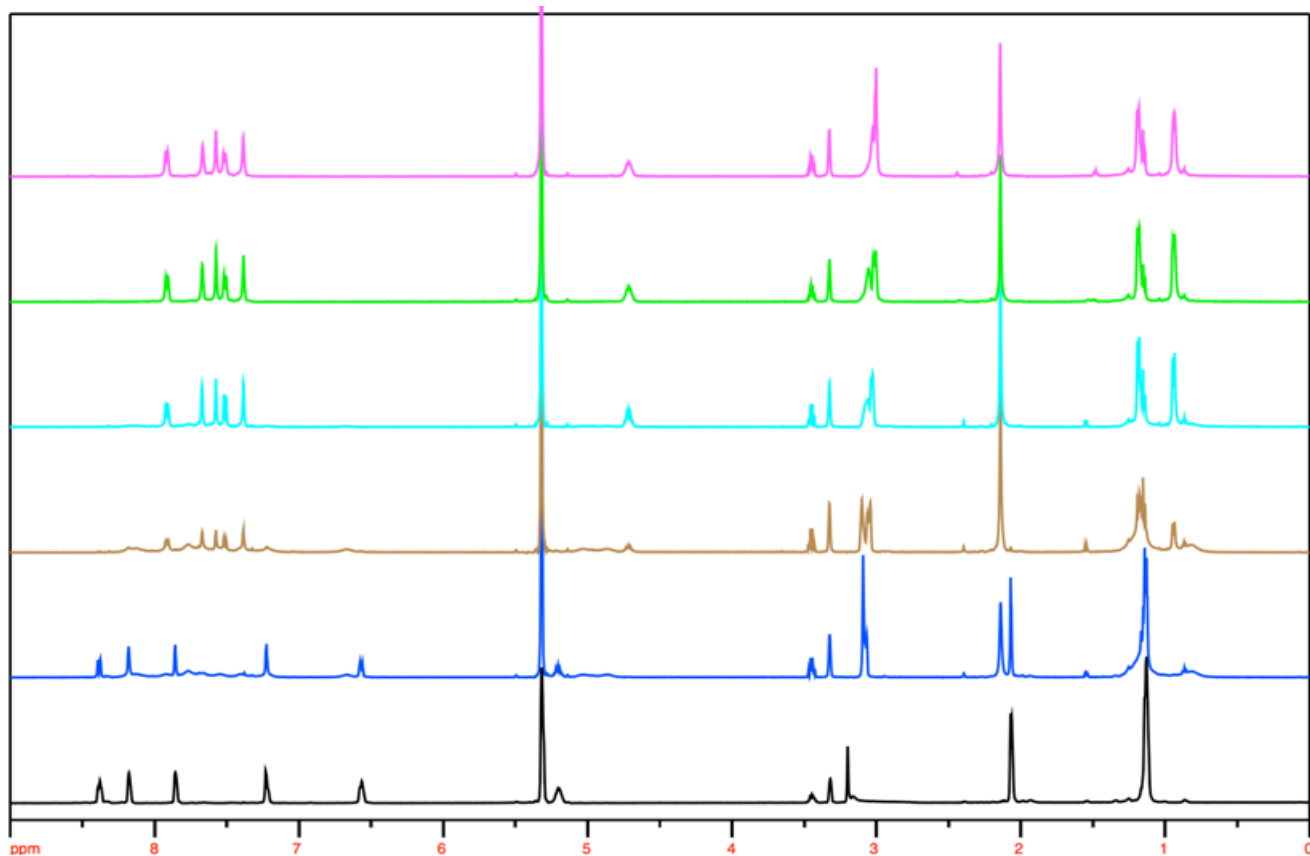

Supplementary Figure 44. Full <sup>1</sup>H NMR spectra of complexation of **2c** with AgBF<sub>4</sub> (0–2.5 equiv. from bottom to top; 500 MHz, CD<sub>2</sub>Cl<sub>2</sub>/CD<sub>3</sub>OD = 9:1, v:v, 300 K)

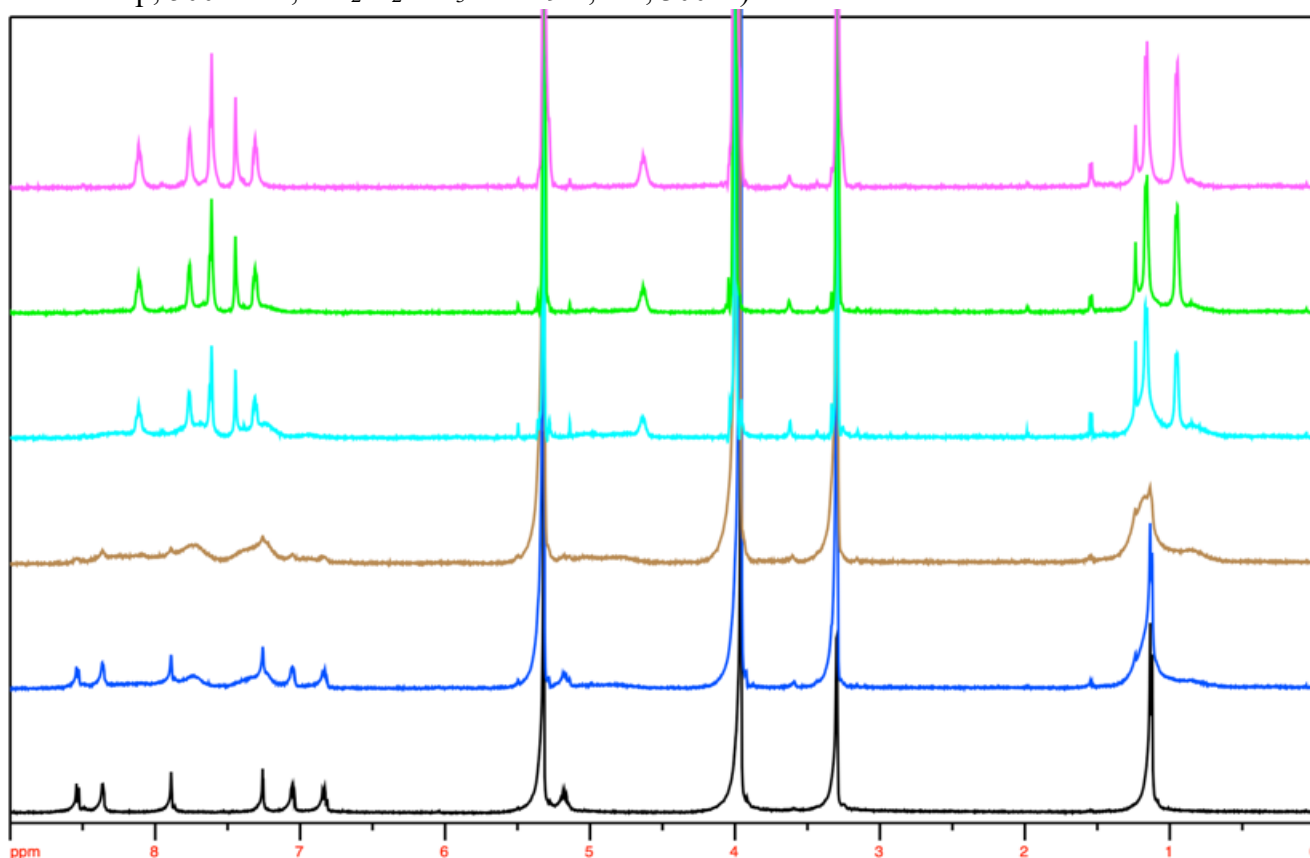

Supplementary Figure 45. Full <sup>1</sup>H NMR spectra of complexation of **2d** with AgBF<sub>4</sub> (0–2.5 equiv. from bottom to top; 500 MHz, CD<sub>2</sub>Cl<sub>2</sub>/CD<sub>3</sub>OD = 3:1, v:v, 300 K)

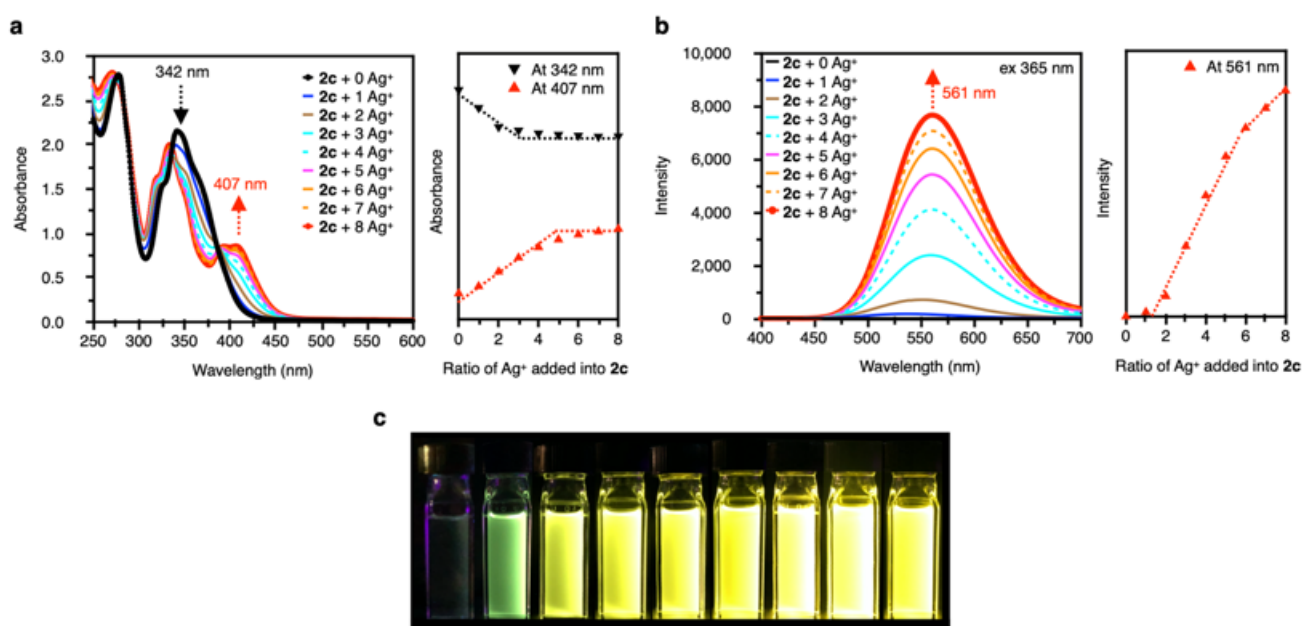

Supplementary Figure 46. Complexation of **2b** with AgBF<sub>4</sub> (CH<sub>2</sub>Cl<sub>2</sub>/CH<sub>3</sub>CN = 9:1, v:v). **a**, UV-vis spectra of **2b** (6.7 × 10<sup>-5</sup> mol/L) with 0–8 equiv. of AgBF<sub>4</sub> in CH<sub>2</sub>Cl<sub>2</sub>/CH<sub>3</sub>CN (9:1, v:v, 293 K), and plots of absorbance at 342 and 407 nm vs ratio of Ag<sup>+</sup> added. **b**, Emission spectra of **2b** (6.7 × 10<sup>-5</sup> mol/L) with 0–8 equiv. of AgBF<sub>4</sub> in CH<sub>2</sub>Cl<sub>2</sub>/CH<sub>3</sub>CN (9:1, v:v, 293 K), and plots of emission intensity at 561 nm vs ratio of Ag<sup>+</sup> added (ex = 365 nm). **c**, Photos of luminescence of **2b** (6.7 × 10<sup>-5</sup> mol/L) with 0–8 equiv. of AgBF<sub>4</sub> in CH<sub>2</sub>Cl<sub>2</sub>/CH<sub>3</sub>CN (9:1, v:v, 293 K, from left to right).

Supplementary Table 13. Key structural parameters of **3a-d** and **4** (\*Corresponds to Au–P distances for **4**)

|                        | Au–C<br>(central C <sup>+</sup> , Å) | Au–Au (Å)                    | Au–C<br>(NHC ligands, Å)*  | Au–Ag (Å)                  | Ag–N (Å)                 |
|------------------------|--------------------------------------|------------------------------|----------------------------|----------------------------|--------------------------|
| <b>3a</b>              | 2.1102 (4) –<br>2.1185 (4)           | 2.9471 (5) –<br>3.0252 (5)   | 2.025 (10) –<br>2.027 (10) | 2.8372 (8) –<br>2.8729 (8) | 2.393 (8) –<br>2.402 (9) |
| <b>3b</b>              | 2.1100 (6)                           | 2.9474 (10) –<br>3.0200 (11) | 2.00 (2)                   | 2.8467 (17)                | 2.337 (10)<br>– 2.34 (2) |
| <b>3c</b>              | 2.1055 (3) –<br>2.1125 (3)           | 2.9361 (5) –<br>3.0342 (5)   | 2.011 (11) –<br>2.041 (9)  | 2.8245 (7) –<br>2.8528 (7) | 2.387 (8) –<br>2.399 (8) |
| <b>3d</b>              | 2.1074 (3) –<br>2.1116 (3)           | 2.9269 (4) –<br>3.0423 (4)   | 2.021 (8) –<br>2.038 (7)   | 2.8334 (5) –<br>2.8796 (5) | 2.333 (6) –<br>2.420 (6) |
| <b>4</b> <sup>12</sup> | 2.0980 (4) –<br>2.1144 (4)           | 2.9406 (5) –<br>3.0164 (5)   | 2.250 (2) –<br>2.266 (2)   | 2.9134 (8) –<br>2.9316 (8) | 2.345 (8) –<br>2.356 (8) |

Supplementary Table 14. Crystallographic experimental information of **3a**

|                                                                                                                         |                                                                                                                                                                                                 |
|-------------------------------------------------------------------------------------------------------------------------|-------------------------------------------------------------------------------------------------------------------------------------------------------------------------------------------------|
| Crystal data                                                                                                            |                                                                                                                                                                                                 |
| Chemical formula                                                                                                        | C <sub>97</sub> H <sub>102</sub> Ag <sub>2</sub> Au <sub>6</sub> N <sub>18</sub> ·CH <sub>2</sub> Cl <sub>2</sub> ·C <sub>4</sub> H <sub>10</sub> O·4(BF <sub>4</sub> )                         |
| <i>M</i> <sub>r</sub>                                                                                                   | 3423.78                                                                                                                                                                                         |
| Crystal system, space group                                                                                             | Orthorhombic, <i>Pbca</i>                                                                                                                                                                       |
| Temperature (K)                                                                                                         | 93                                                                                                                                                                                              |
| <i>a</i> , <i>b</i> , <i>c</i> (Å)                                                                                      | 24.2245 (3), 16.5641 (2), 28.4767 (4)                                                                                                                                                           |
| <i>V</i> (Å <sup>3</sup> )                                                                                              | 11426.5 (3)                                                                                                                                                                                     |
| <i>Z</i>                                                                                                                | 4                                                                                                                                                                                               |
| Radiation type                                                                                                          | Cu <i>K</i> <sub>α</sub>                                                                                                                                                                        |
| <i>m</i> (mm <sup>-1</sup> )                                                                                            | 17.89                                                                                                                                                                                           |
| Crystal size (mm)                                                                                                       | 0.1 × 0.1 × 0.02                                                                                                                                                                                |
| Data collection                                                                                                         |                                                                                                                                                                                                 |
| Diffractometer                                                                                                          | XtaLAB Pro: Kappa single                                                                                                                                                                        |
| Absorption correction                                                                                                   | Multi-scan<br><i>CrysAlis PRO</i> 1.171.39.20a (Rigaku Oxford Diffraction, 2015)<br>Empirical absorption correction using spherical harmonics, implemented in SCALE3 ABSPACK scaling algorithm. |
| <i>T</i> <sub>min</sub> , <i>T</i> <sub>max</sub>                                                                       | 0.429, 1.000                                                                                                                                                                                    |
| No. of measured, independent and observed [ <i>I</i> > 2 <i>s</i> ( <i>I</i> )] reflections                             | 36829, 11274, 9369                                                                                                                                                                              |
| <i>R</i> <sub>int</sub>                                                                                                 | 0.087                                                                                                                                                                                           |
| (sin <i>q</i> / <i>l</i> ) <sub>max</sub> (Å <sup>-1</sup> )                                                            | 0.622                                                                                                                                                                                           |
| Refinement                                                                                                              |                                                                                                                                                                                                 |
| <i>R</i> [ <i>F</i> <sup>2</sup> > 2 <i>s</i> ( <i>F</i> <sup>2</sup> )], <i>wR</i> ( <i>F</i> <sup>2</sup> ), <i>S</i> | 0.074, 0.218, 1.08                                                                                                                                                                              |
| No. of reflections                                                                                                      | 11274                                                                                                                                                                                           |
| No. of parameters                                                                                                       | 805                                                                                                                                                                                             |
| No. of restraints                                                                                                       | 214                                                                                                                                                                                             |
| H-atom treatment                                                                                                        | H-atom parameters constrained                                                                                                                                                                   |
|                                                                                                                         | $w = 1/[s^2(F_o^2) + (0.1496P)^2 + 46.3755P]$ where $P = (F_o^2 + 2F_c^2)/3$                                                                                                                    |
| Dρ <sub>max</sub> , Dρ <sub>min</sub> (e Å <sup>-3</sup> )                                                              | 4.48, -4.12                                                                                                                                                                                     |

Computer programs: *CrysAlis PRO* 1.171.39.20a (Rigaku OD, 2015), *SHELXS* (Sheldrick, 2008), *SHELXT* (Sheldrick, 2015), *SHELXL* (Sheldrick, 2015), *Olex2* (Dolomanov *et al.*, 2009).

Supplementary Table 15. Crystallographic experimental information of **3b**

|                                                                       |                                                                                                                                                                                                 |
|-----------------------------------------------------------------------|-------------------------------------------------------------------------------------------------------------------------------------------------------------------------------------------------|
| Crystal data                                                          |                                                                                                                                                                                                 |
| Chemical formula                                                      | C <sub>91</sub> H <sub>90</sub> Ag <sub>2</sub> Au <sub>6</sub> N <sub>18</sub> ·2(B <sub>2</sub> F <sub>8</sub> )                                                                              |
| $M_r$                                                                 | 3180.58                                                                                                                                                                                         |
| Crystal system, space group                                           | Cubic, $Pa\bar{3}$                                                                                                                                                                              |
| Temperature (K)                                                       | 93                                                                                                                                                                                              |
| $a$ (Å)                                                               | 21.4309 (3)                                                                                                                                                                                     |
| $V$ (Å <sup>3</sup> )                                                 | 9842.9 (4)                                                                                                                                                                                      |
| $Z$                                                                   | 4                                                                                                                                                                                               |
| Radiation type                                                        | Cu $K\alpha$                                                                                                                                                                                    |
| $\mu$ (mm <sup>-1</sup> )                                             | 20.21                                                                                                                                                                                           |
| Crystal size (mm)                                                     | 0.08 × 0.08 × 0.04                                                                                                                                                                              |
| Data collection                                                       |                                                                                                                                                                                                 |
| Diffractometer                                                        | XtaLAB Pro: Kappa single                                                                                                                                                                        |
| Absorption correction                                                 | Multi-scan<br><i>CrysAlis PRO</i> 1.171.39.20a (Rigaku Oxford Diffraction, 2015)<br>Empirical absorption correction using spherical harmonics, implemented in SCALE3 ABSPACK scaling algorithm. |
| $T_{\min}$ , $T_{\max}$                                               | 0.704, 1.000                                                                                                                                                                                    |
| No. of measured, independent and observed [ $I > 2s(I)$ ] reflections | 11369, 3257, 1987                                                                                                                                                                               |
| $R_{\text{int}}$                                                      | 0.038                                                                                                                                                                                           |
| $(\sin \theta/\lambda)_{\text{max}}$ (Å <sup>-1</sup> )               | 0.622                                                                                                                                                                                           |
| Refinement                                                            |                                                                                                                                                                                                 |
| $R[F^2 > 2s(F^2)]$ , $wR(F^2)$ , $S$                                  | 0.071, 0.224, 1.03                                                                                                                                                                              |
| No. of reflections                                                    | 3257                                                                                                                                                                                            |
| No. of parameters                                                     | 235                                                                                                                                                                                             |
| No. of restraints                                                     | 260                                                                                                                                                                                             |
| H-atom treatment                                                      | H-atom parameters constrained                                                                                                                                                                   |
|                                                                       | $w = 1/[s^2(F_o^2) + (0.0988P)^2 + 56.7544P]$ where $P = (F_o^2 + 2F_c^2)/3$                                                                                                                    |
| $D\rho_{\text{max}}$ , $D\rho_{\text{min}}$ (e Å <sup>-3</sup> )      | 1.17, -1.65                                                                                                                                                                                     |

Computer programs: *CrysAlis PRO* 1.171.39.20a (Rigaku OD, 2015), *SHELXS* (Sheldrick, 2008), *SHELXT* (Sheldrick, 2015), *SHELXL* (Sheldrick, 2015), *Olex2* (Dolomanov *et al.*, 2009).

Supplementary Table 16. Crystallographic experimental information of **3c**

|                                                                                                                         |                                                                                                                                                                                                    |
|-------------------------------------------------------------------------------------------------------------------------|----------------------------------------------------------------------------------------------------------------------------------------------------------------------------------------------------|
| Crystal data                                                                                                            |                                                                                                                                                                                                    |
| Chemical formula                                                                                                        | C <sub>73</sub> H <sub>90</sub> Ag <sub>2</sub> Au <sub>6</sub> N <sub>18</sub> ·3(CH <sub>2</sub> Cl <sub>2</sub> )·4(BF <sub>4</sub> )                                                           |
| <i>M</i> <sub>r</sub>                                                                                                   | 3219.18                                                                                                                                                                                            |
| Crystal system, space group                                                                                             | Monoclinic, <i>P</i> 2 <sub>1</sub> / <i>n</i>                                                                                                                                                     |
| Temperature (K)                                                                                                         | 93                                                                                                                                                                                                 |
| <i>a</i> , <i>b</i> , <i>c</i> (Å)                                                                                      | 14.19709 (9), 22.00686 (14), 17.72550 (11)                                                                                                                                                         |
| <i>b</i> (°)                                                                                                            | 91.5272 (6)                                                                                                                                                                                        |
| <i>V</i> (Å <sup>3</sup> )                                                                                              | 5536.07 (6)                                                                                                                                                                                        |
| <i>Z</i>                                                                                                                | 2                                                                                                                                                                                                  |
| Radiation type                                                                                                          | Cu <i>K</i> α                                                                                                                                                                                      |
| <i>m</i> (mm <sup>-1</sup> )                                                                                            | 19.27                                                                                                                                                                                              |
| Crystal size (mm)                                                                                                       | 0.15 × 0.12 × 0.1                                                                                                                                                                                  |
| Data collection                                                                                                         |                                                                                                                                                                                                    |
| Diffractometer                                                                                                          | XtaLAB Pro: Kappa single                                                                                                                                                                           |
| Absorption correction                                                                                                   | Multi-scan<br><i>CrysAlis PRO</i> 1.171.39.20a (Rigaku Oxford Diffraction, 2015)<br>Empirical absorption correction using spherical harmonics,<br>implemented in SCALE3 ABSPACK scaling algorithm. |
| <i>T</i> <sub>min</sub> , <i>T</i> <sub>max</sub>                                                                       | 0.133, 1.000                                                                                                                                                                                       |
| No. of measured, independent and observed [ <i>I</i> > 2 <i>s</i> ( <i>I</i> )] reflections                             | 34204, 10825, 9747                                                                                                                                                                                 |
| <i>R</i> <sub>int</sub>                                                                                                 | 0.052                                                                                                                                                                                              |
| (sin <i>q</i> / <i>l</i> ) <sub>max</sub> (Å <sup>-1</sup> )                                                            | 0.622                                                                                                                                                                                              |
| Refinement                                                                                                              |                                                                                                                                                                                                    |
| <i>R</i> [ <i>F</i> <sup>2</sup> > 2 <i>s</i> ( <i>F</i> <sup>2</sup> )], <i>wR</i> ( <i>F</i> <sup>2</sup> ), <i>S</i> | 0.055, 0.164, 1.05                                                                                                                                                                                 |
| No. of reflections                                                                                                      | 10825                                                                                                                                                                                              |
| No. of parameters                                                                                                       | 745                                                                                                                                                                                                |
| No. of restraints                                                                                                       | 168                                                                                                                                                                                                |
| H-atom treatment                                                                                                        | H-atom parameters constrained                                                                                                                                                                      |
|                                                                                                                         | $w = 1/[s^2(F_o^2) + (0.1056P)^2 + 44.7649P]$ where $P = (F_o^2 + 2F_c^2)/3$                                                                                                                       |
| Dρ <sub>max</sub> , Dρ <sub>min</sub> (e Å <sup>-3</sup> )                                                              | 2.69, -2.58                                                                                                                                                                                        |

Computer programs: *CrysAlis PRO* 1.171.39.20a (Rigaku OD, 2015), *SHELXS* (Sheldrick, 2008), *SHELXT* (Sheldrick, 2015), *SHELXL* (Sheldrick, 2015), *Olex2* (Dolomanov *et al.*, 2009).

Supplementary Table 17. Crystallographic experimental information of **3d**

|                                                                                                                         |                                                                                                                                                                                                 |
|-------------------------------------------------------------------------------------------------------------------------|-------------------------------------------------------------------------------------------------------------------------------------------------------------------------------------------------|
| Crystal data                                                                                                            |                                                                                                                                                                                                 |
| Chemical formula                                                                                                        | C <sub>67</sub> H <sub>78</sub> Ag <sub>2</sub> Au <sub>6</sub> N <sub>18</sub> ·4(BF <sub>4</sub> )                                                                                            |
| <i>M</i> <sub>r</sub>                                                                                                   | 2880.25                                                                                                                                                                                         |
| Crystal system, space group                                                                                             | Triclinic, <i>P</i> <sup>-</sup> 1                                                                                                                                                              |
| Temperature (K)                                                                                                         | 93                                                                                                                                                                                              |
| <i>a</i> , <i>b</i> , <i>c</i> (Å)                                                                                      | 13.1774 (2), 13.7082 (3), 14.1451 (3)                                                                                                                                                           |
| <i>a</i> , <i>b</i> , <i>g</i> (°)                                                                                      | 70.3331 (18), 62.338 (2), 88.5226 (16)                                                                                                                                                          |
| <i>V</i> (Å <sup>3</sup> )                                                                                              | 2104.84 (8)                                                                                                                                                                                     |
| <i>Z</i>                                                                                                                | 1                                                                                                                                                                                               |
| Radiation type                                                                                                          | Cu <i>K</i> α                                                                                                                                                                                   |
| <i>m</i> (mm <sup>-1</sup> )                                                                                            | 23.52                                                                                                                                                                                           |
| Crystal size (mm)                                                                                                       | 0.02 × 0.02 × 0.01                                                                                                                                                                              |
| Data collection                                                                                                         |                                                                                                                                                                                                 |
| Diffractometer                                                                                                          | XtaLAB Pro: Kappa single                                                                                                                                                                        |
| Absorption correction                                                                                                   | Multi-scan<br><i>CrysAlis PRO</i> 1.171.39.20a (Rigaku Oxford Diffraction, 2015)<br>Empirical absorption correction using spherical harmonics, implemented in SCALE3 ABSPACK scaling algorithm. |
| <i>T</i> <sub>min</sub> , <i>T</i> <sub>max</sub>                                                                       | 0.690, 1.000                                                                                                                                                                                    |
| No. of measured, independent and observed [ <i>I</i> > 2 <i>s</i> ( <i>I</i> )] reflections                             | 21251, 8189, 7018                                                                                                                                                                               |
| <i>R</i> <sub>int</sub>                                                                                                 | 0.030                                                                                                                                                                                           |
| (sin <i>q</i> / <i>l</i> ) <sub>max</sub> (Å <sup>-1</sup> )                                                            | 0.622                                                                                                                                                                                           |
| Refinement                                                                                                              |                                                                                                                                                                                                 |
| <i>R</i> [ <i>F</i> <sup>2</sup> > 2 <i>s</i> ( <i>F</i> <sup>2</sup> )], <i>wR</i> ( <i>F</i> <sup>2</sup> ), <i>S</i> | 0.036, 0.097, 1.07                                                                                                                                                                              |
| No. of reflections                                                                                                      | 8189                                                                                                                                                                                            |
| No. of parameters                                                                                                       | 582                                                                                                                                                                                             |
| No. of restraints                                                                                                       | 78                                                                                                                                                                                              |
| H-atom treatment                                                                                                        | H-atom parameters constrained                                                                                                                                                                   |
| <i>D</i> ρ <sub>max</sub> , <i>D</i> ρ <sub>min</sub> (e Å <sup>-3</sup> )                                              | 2.26, -1.41                                                                                                                                                                                     |

Computer programs: *CrysAlis PRO* 1.171.39.20a (Rigaku OD, 2015), *SHELXS* (Sheldrick, 2008), *SHELXT* (Sheldrick, 2015), *SHELXL* (Sheldrick, 2015), *Olex2* (Dolomanov *et al.*, 2009).

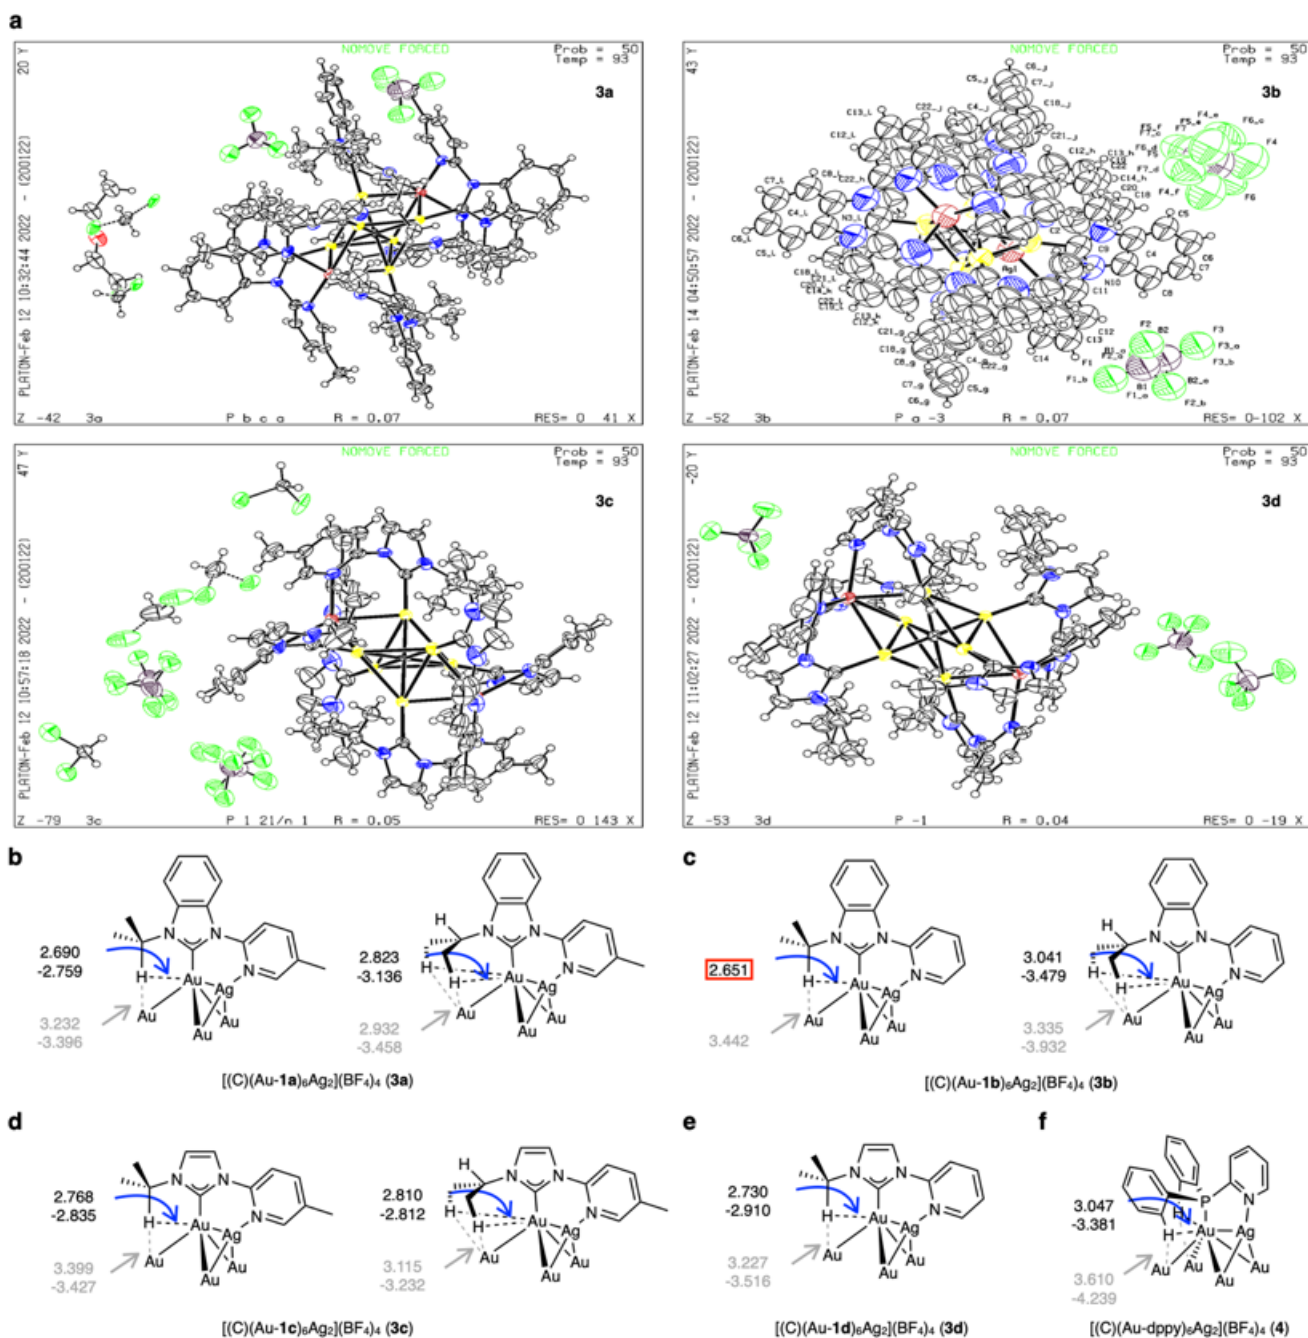

Supplementary Figure 47. ORTEP-style illustration of structures of **3a** (CCDC 2103976), **3b** (CCDC 2103977), **3c** (CCDC 2103978) and **3d** (CCDC 2103979), and schematic presentation of intramolecular C–H···Au interactions in  $CAu_6AgI_2$  clusters<sup>12</sup>

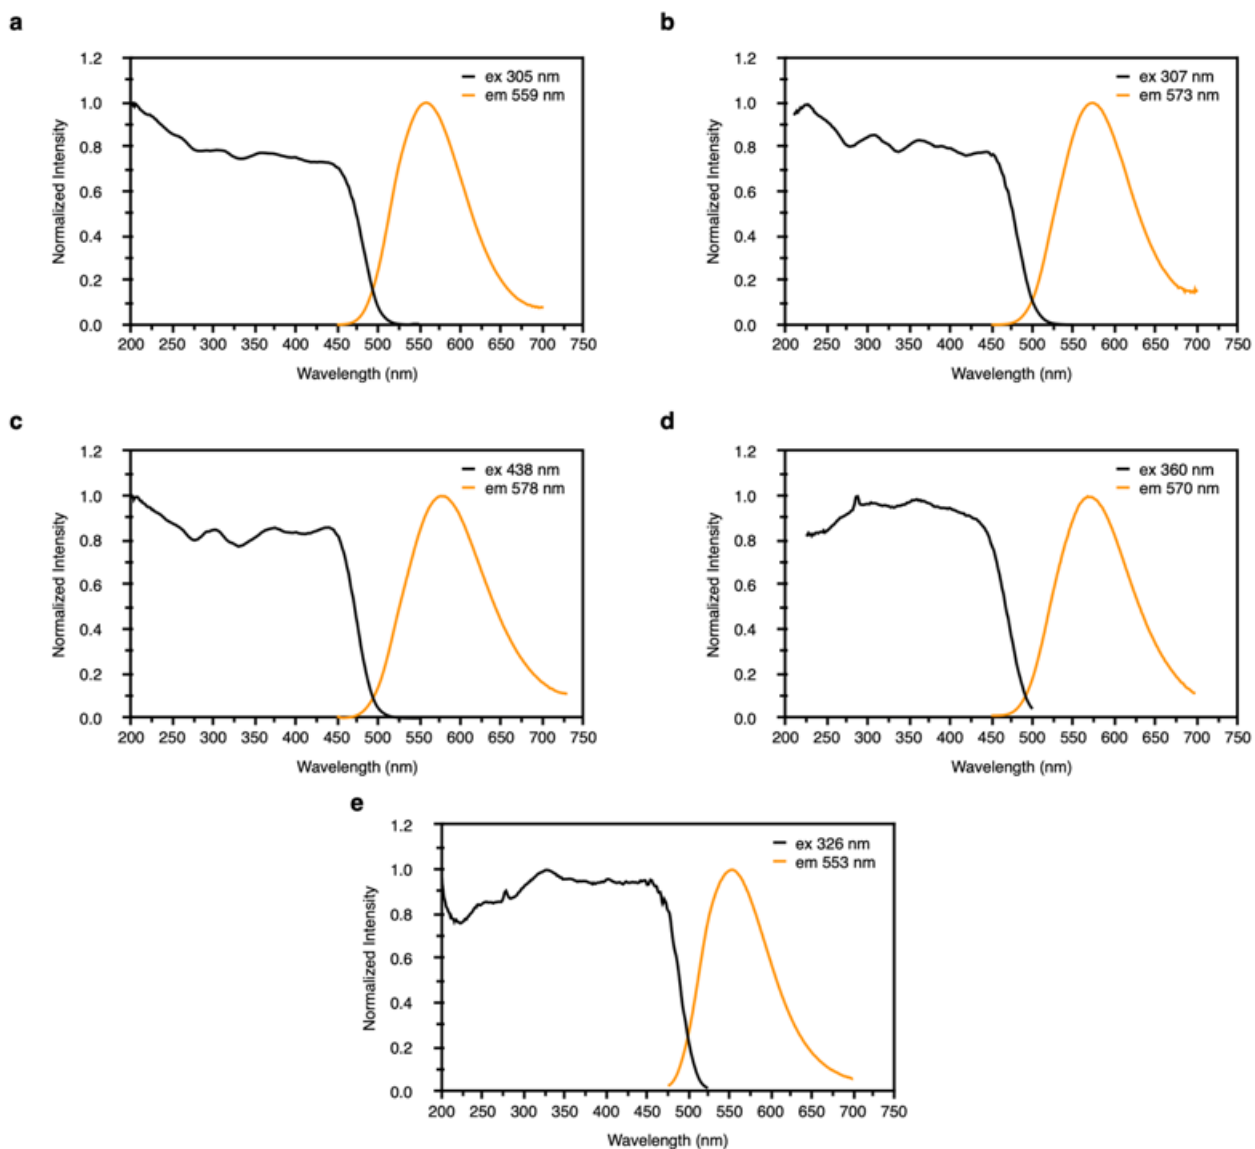

Supplementary Figure 48. Excitation and emission spectra of **3a** (a), **3b** (b), **3c** (c), **3d** (d) and **4** (e) in the solid state (at room temperature)



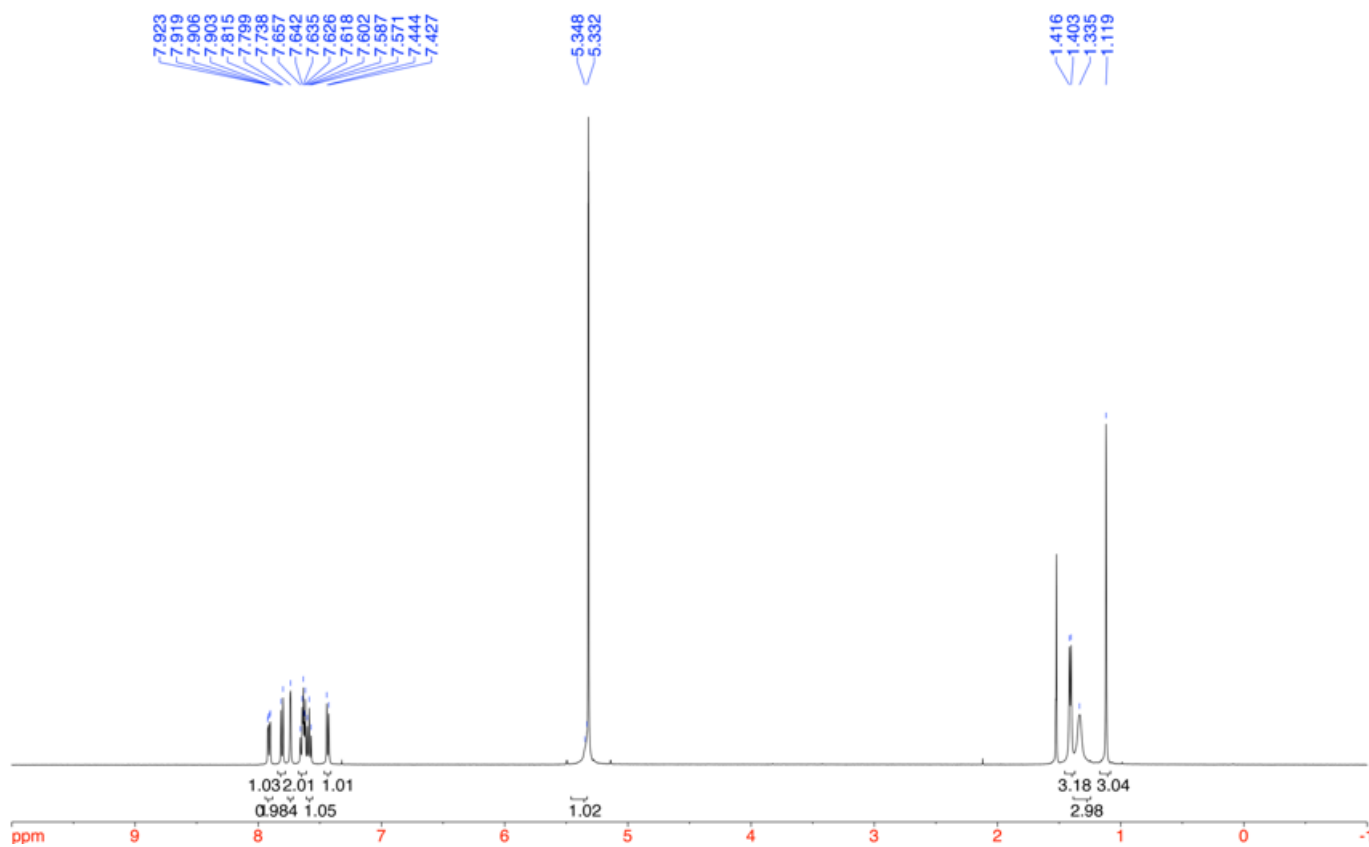

Supplementary Figure 49.  $^1\text{H}$  NMR spectrum of **3a** (500 MHz,  $\text{CD}_2\text{Cl}_2$ , 300 K)

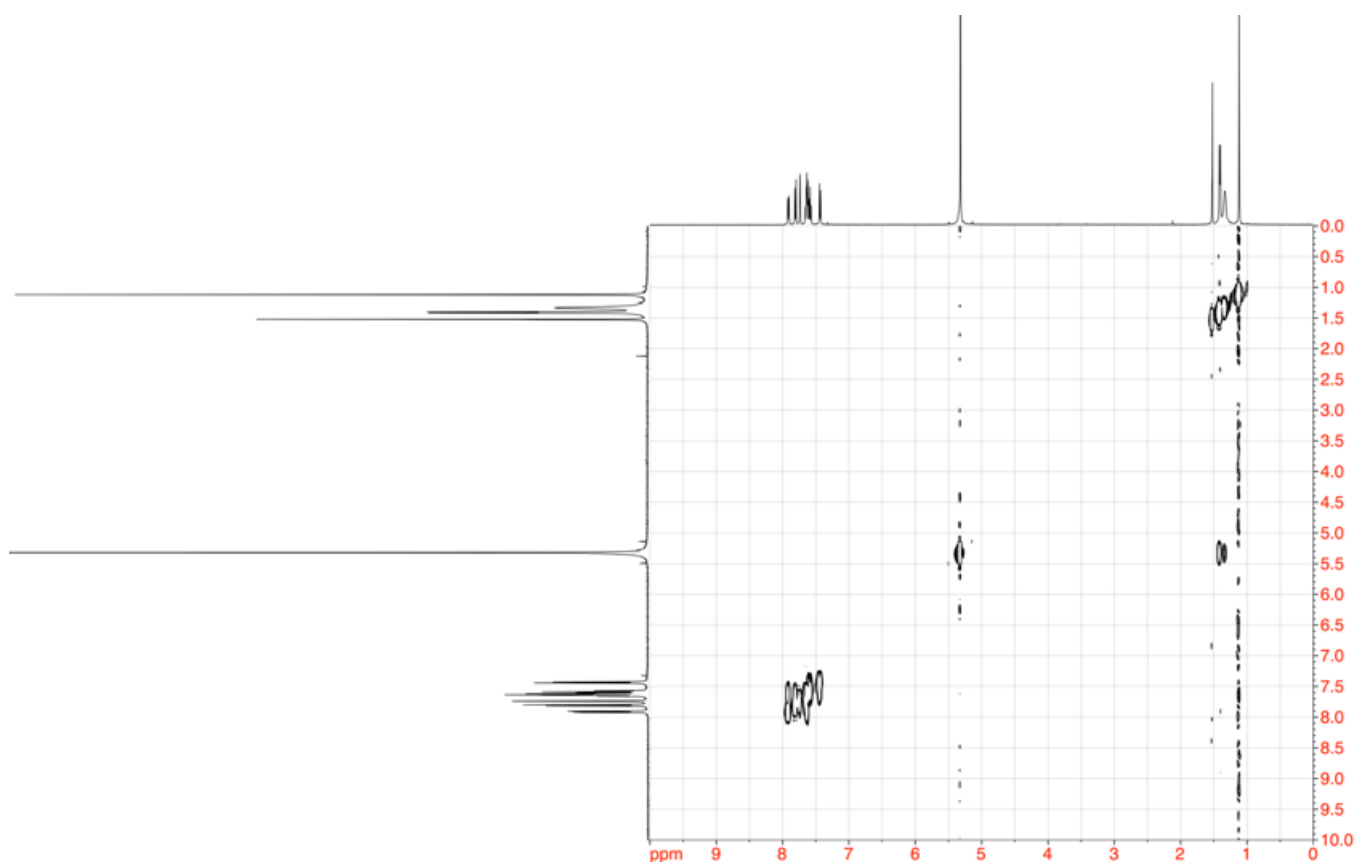

Supplementary Figure 50.  $^1\text{H}$ - $^1\text{H}$  COSY NMR spectrum of **3a** (500 MHz,  $\text{CD}_2\text{Cl}_2$ , 300 K)

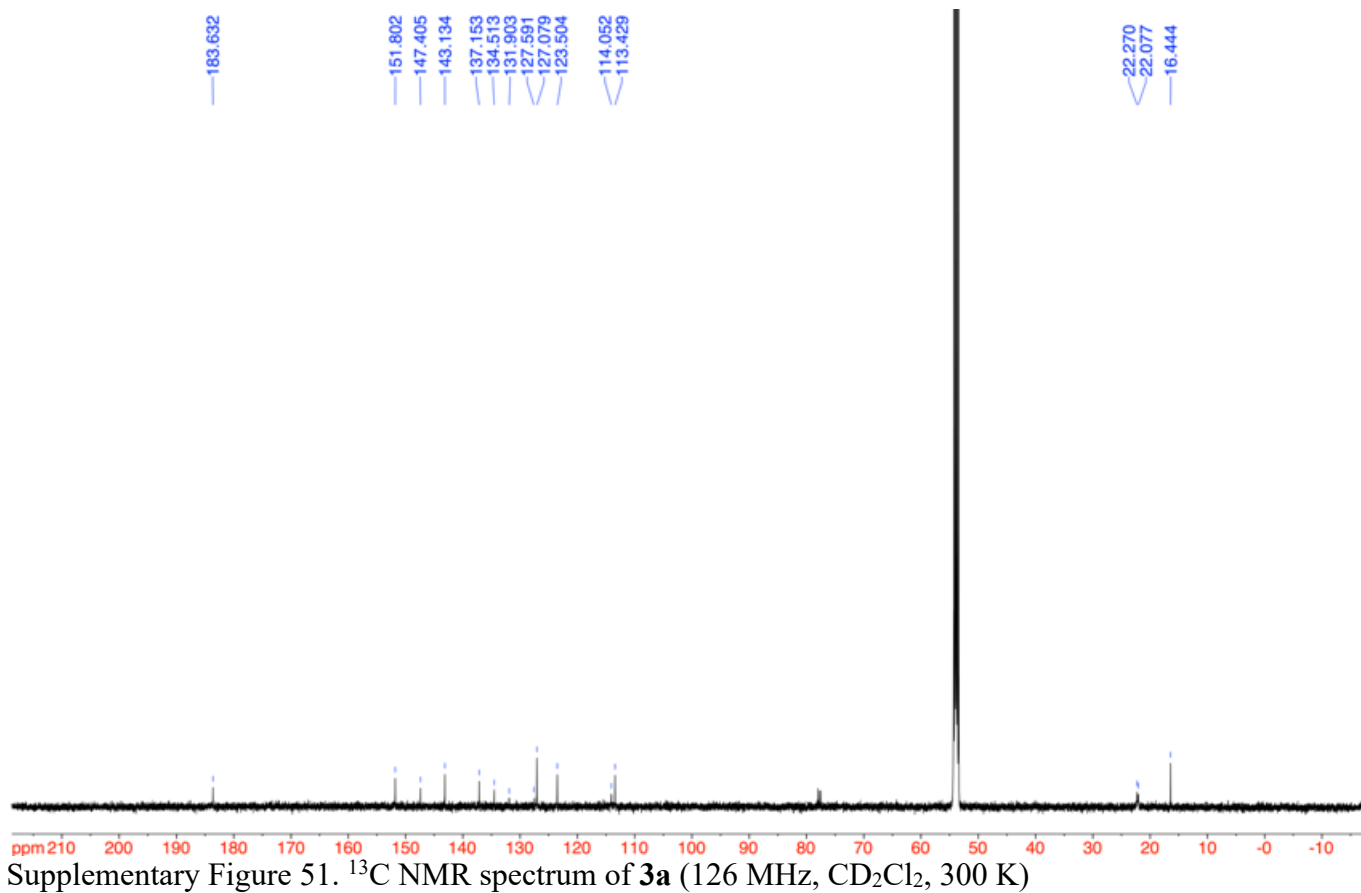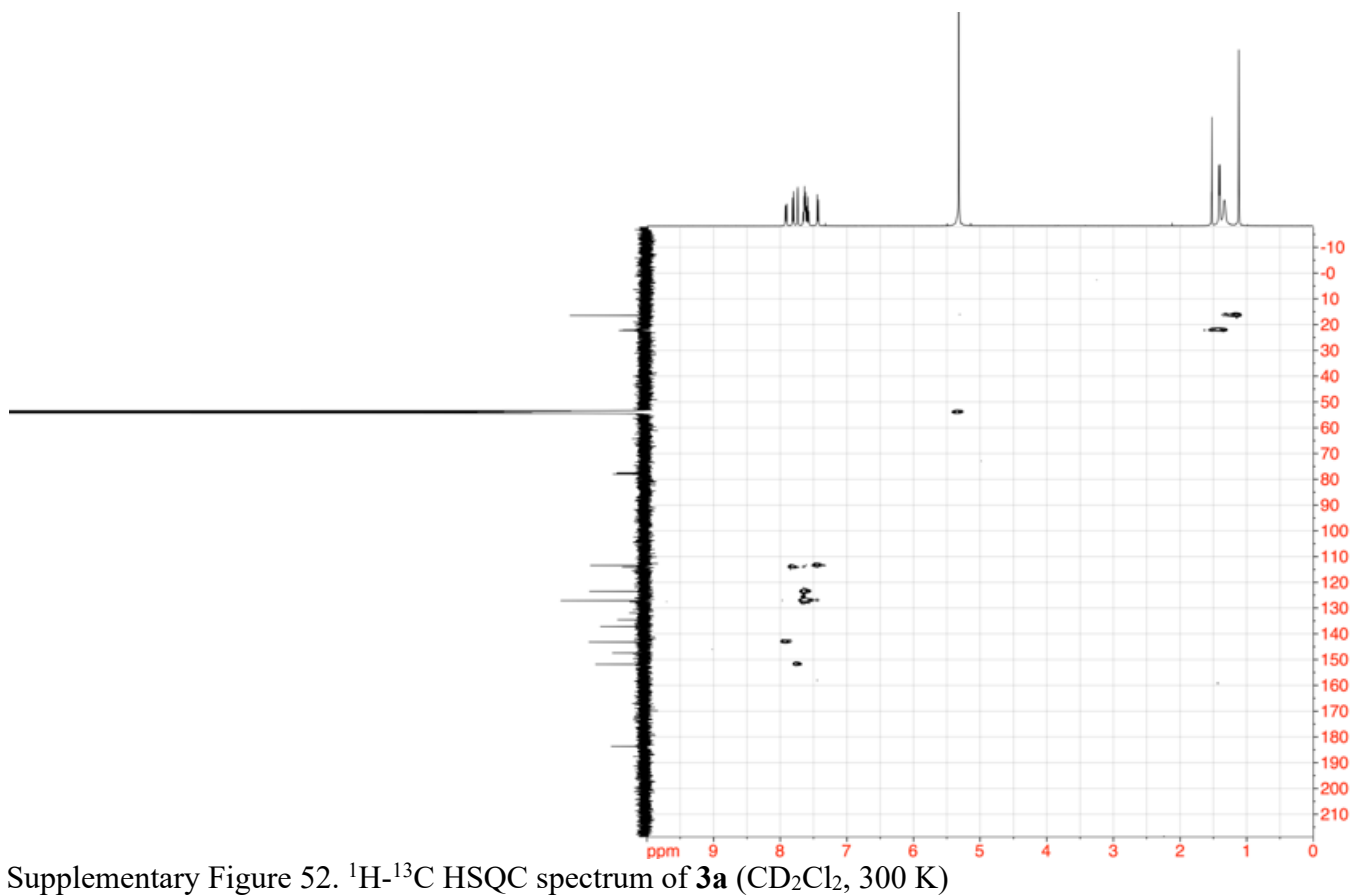

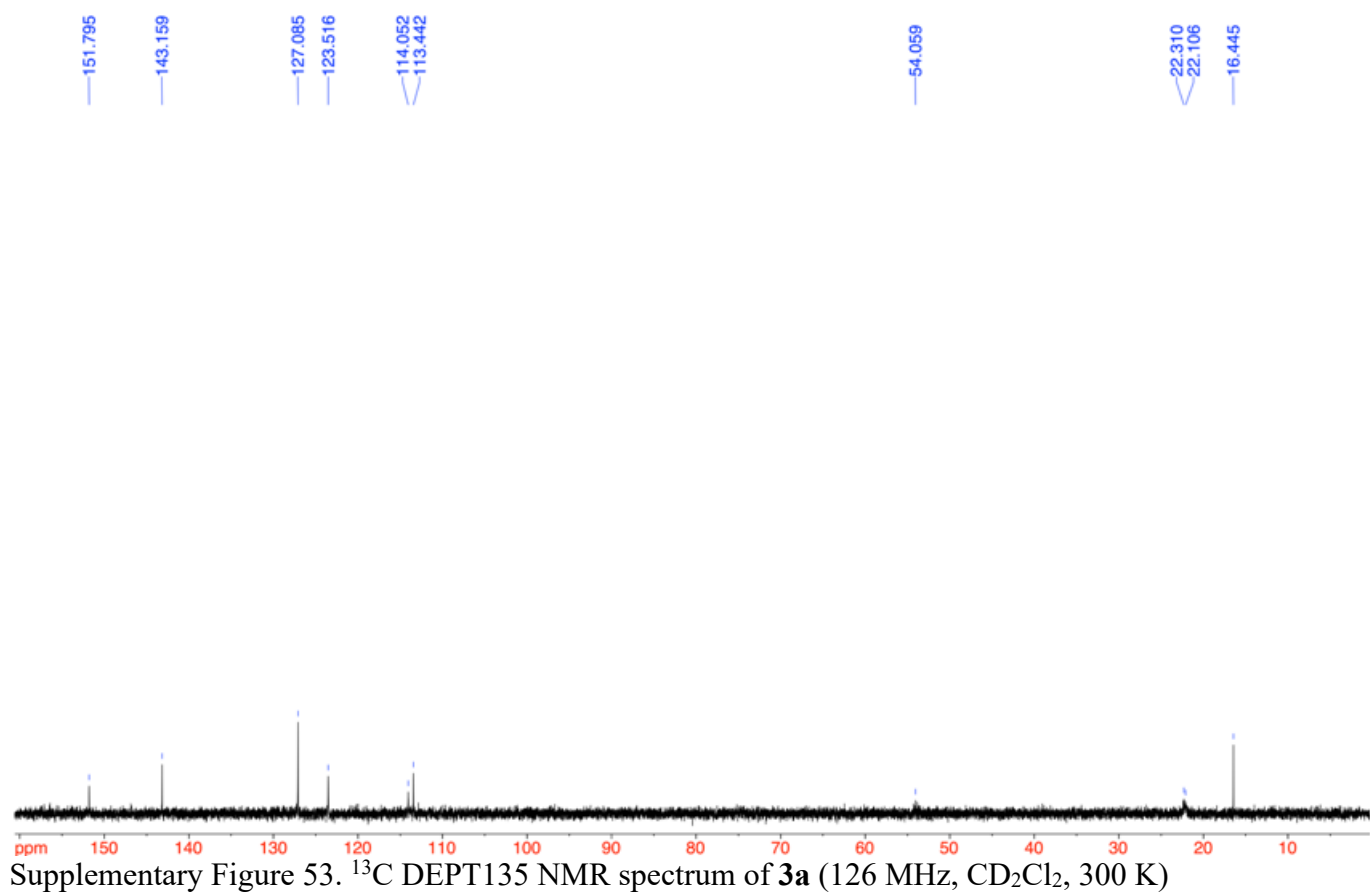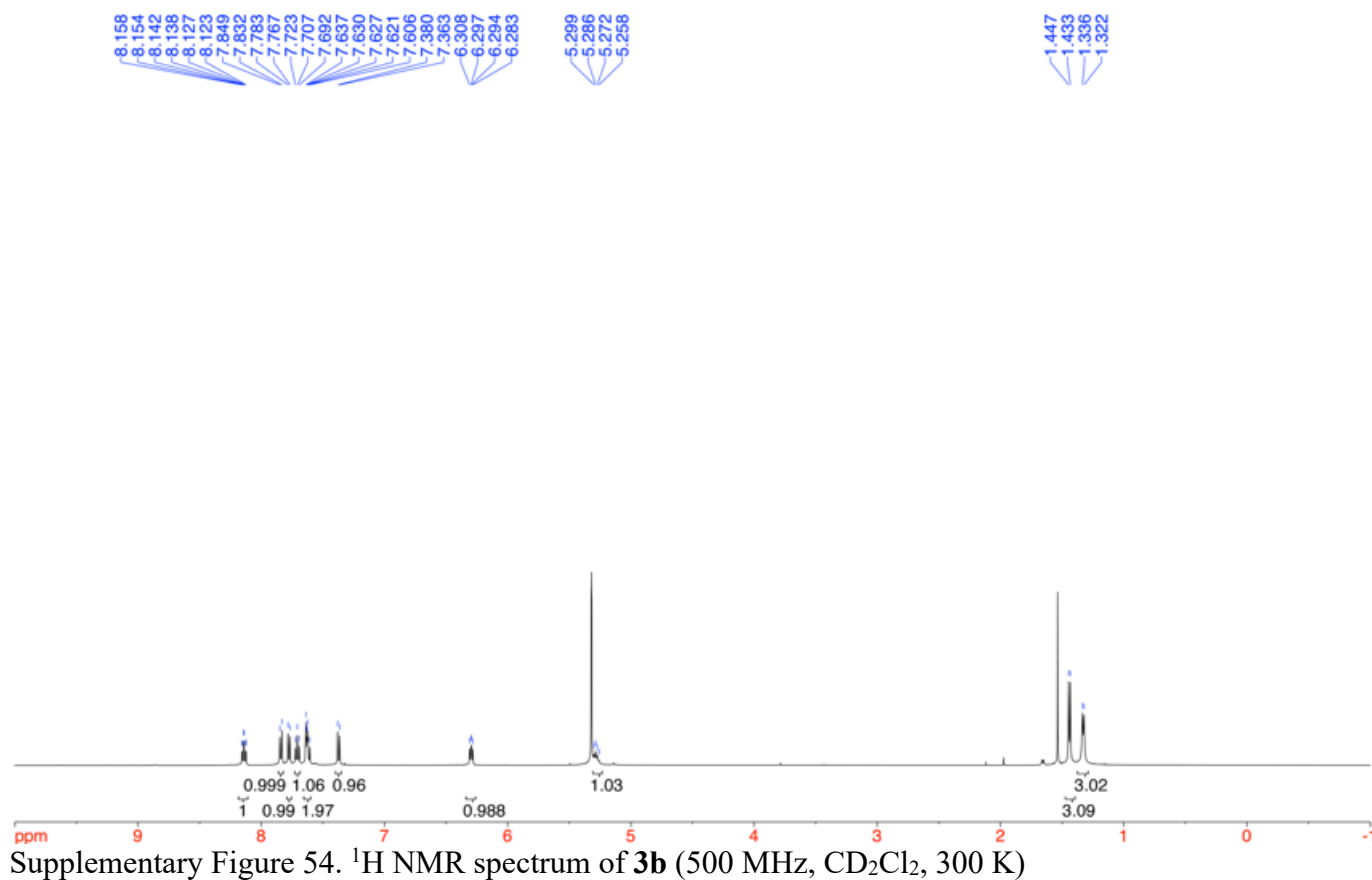

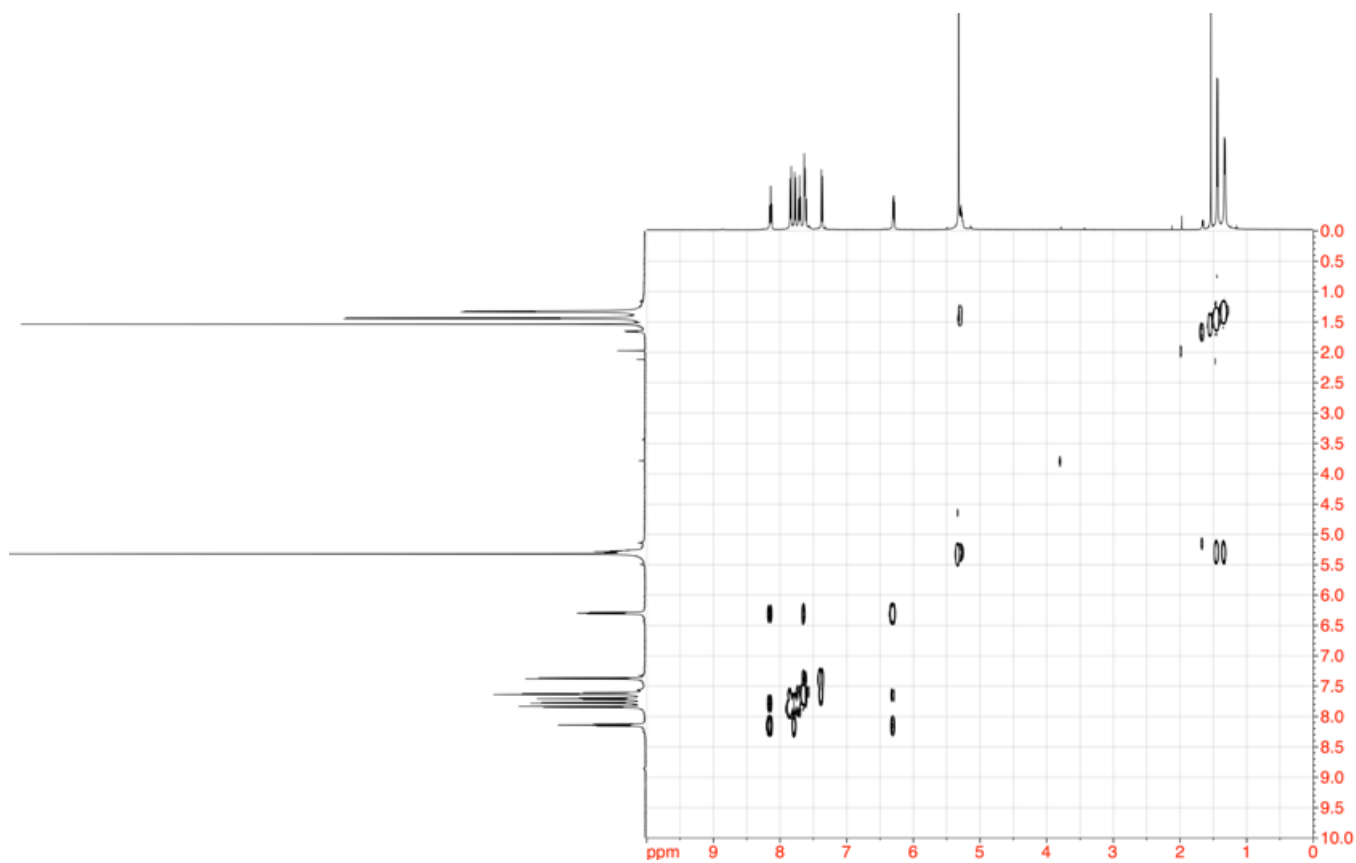

Supplementary Figure 55.  $^1\text{H}$ - $^1\text{H}$  COSY NMR spectrum of **3b** (500 MHz,  $\text{CD}_2\text{Cl}_2$ , 300 K)

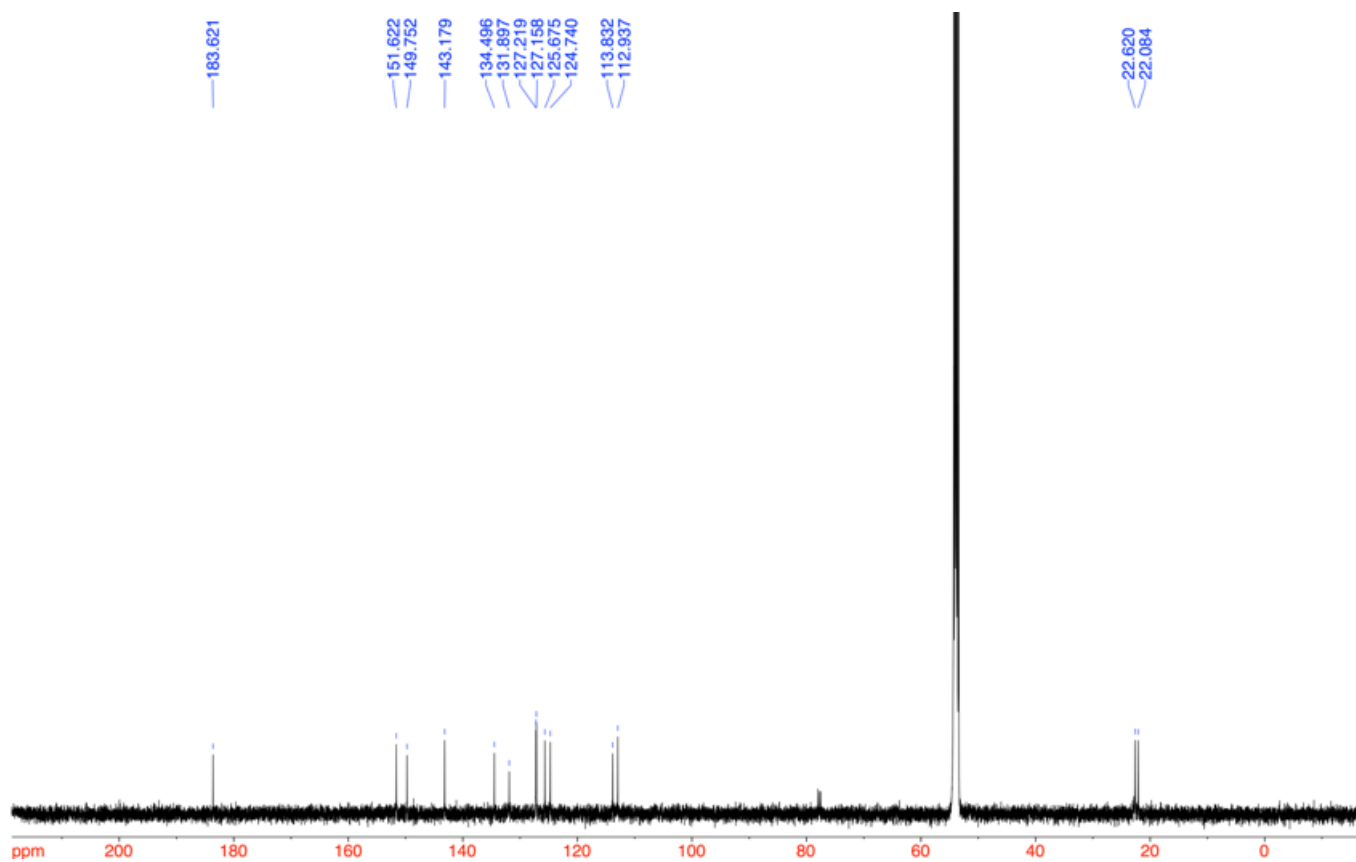

Supplementary Figure 56.  $^{13}\text{C}$  NMR spectrum of **3b** (126 MHz,  $\text{CD}_2\text{Cl}_2$ , 300 K)

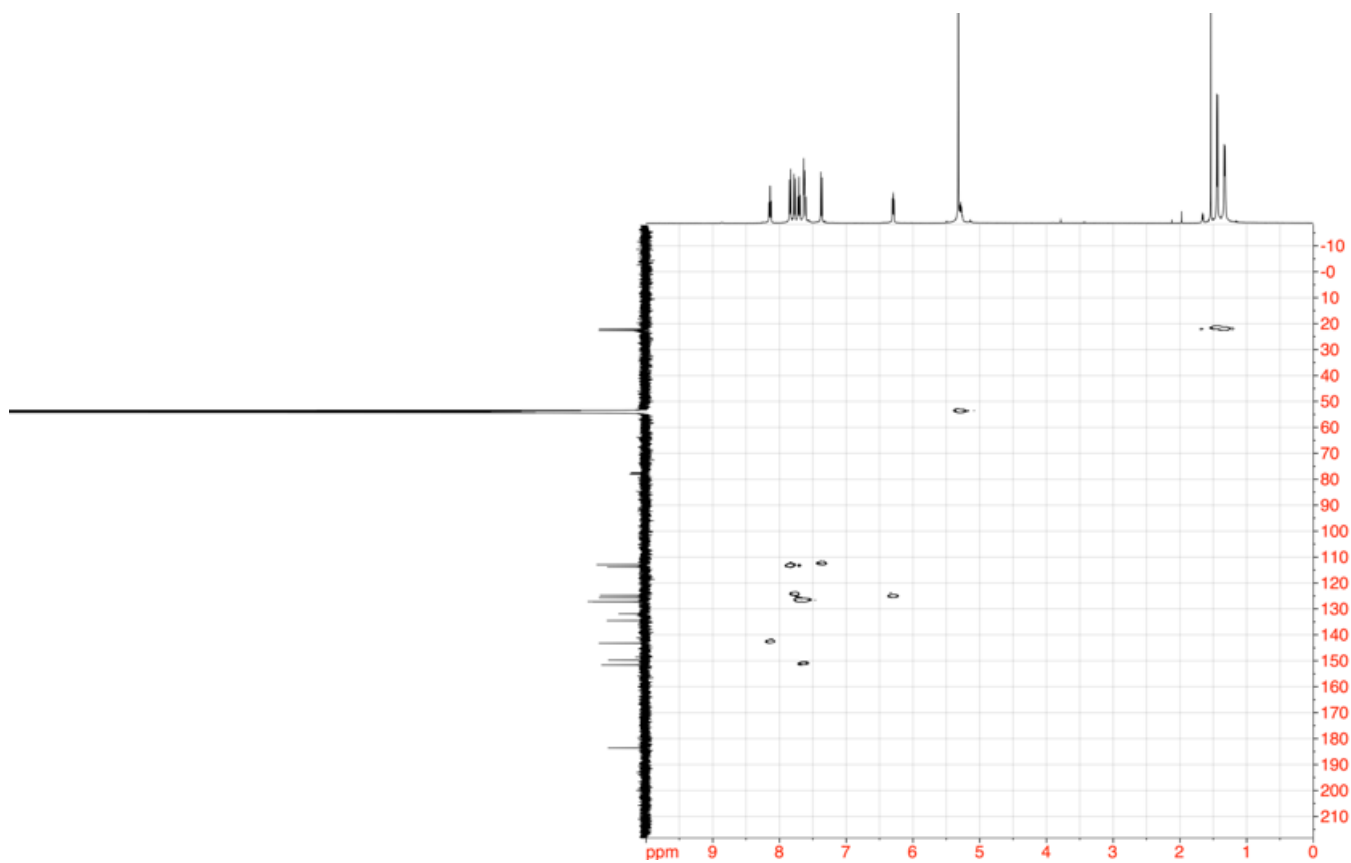

Supplementary Figure 57.  $^1\text{H}$ - $^{13}\text{C}$  HSQC spectrum of **3b** ( $\text{CD}_2\text{Cl}_2$ , 300 K)

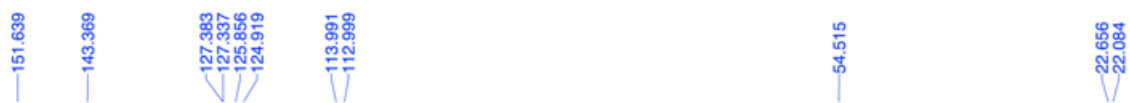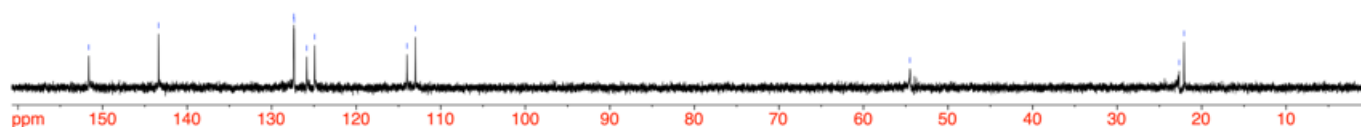

Supplementary Figure 58.  $^{13}\text{C}$  DEPT135 NMR spectrum of **3b** (126 MHz,  $\text{CD}_2\text{Cl}_2$ , 300 K)

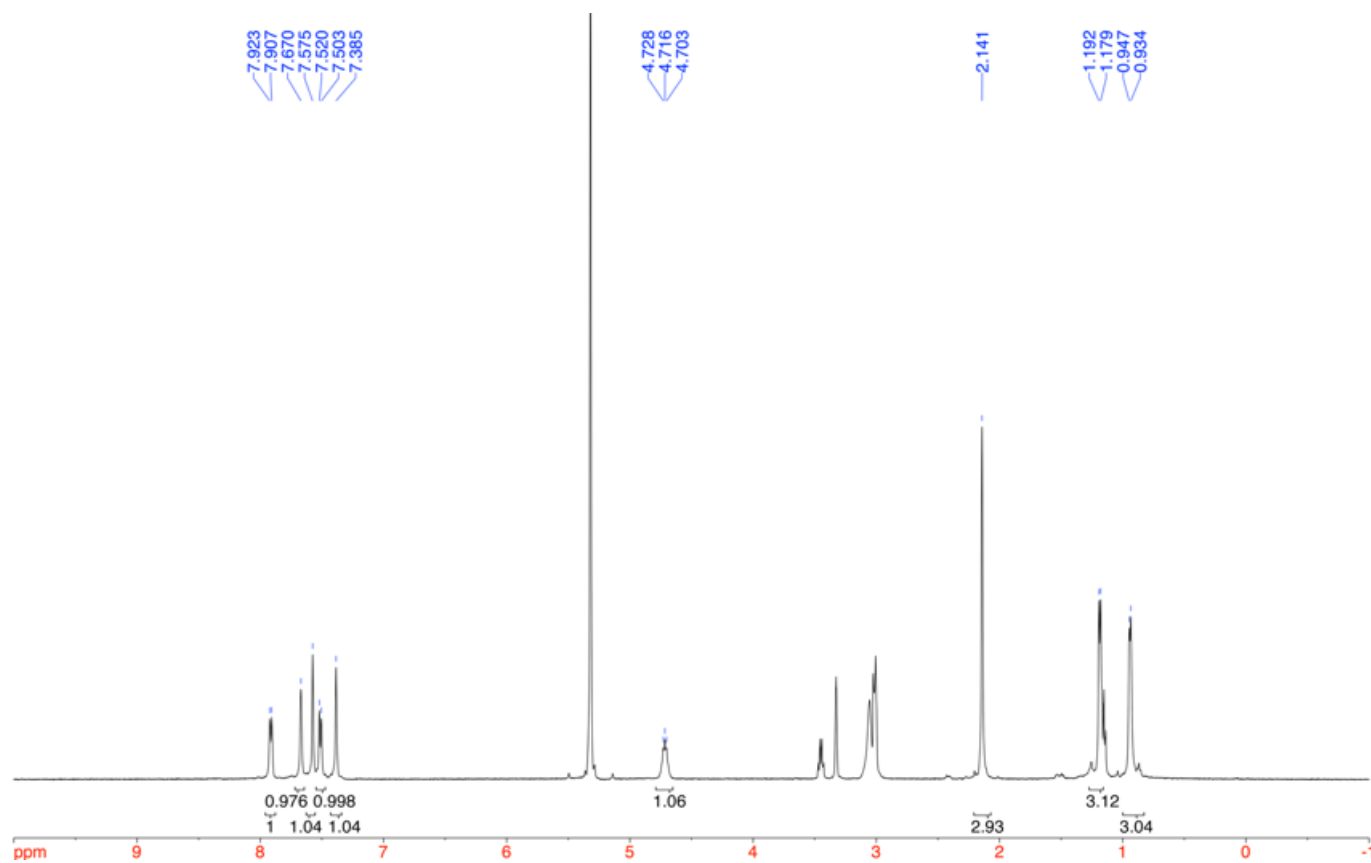

Supplementary Figure 59. <sup>1</sup>H NMR spectrum of **3c** (500 MHz, CD<sub>2</sub>Cl<sub>2</sub>/CD<sub>3</sub>OD = 9:1, v:v; 300 K)

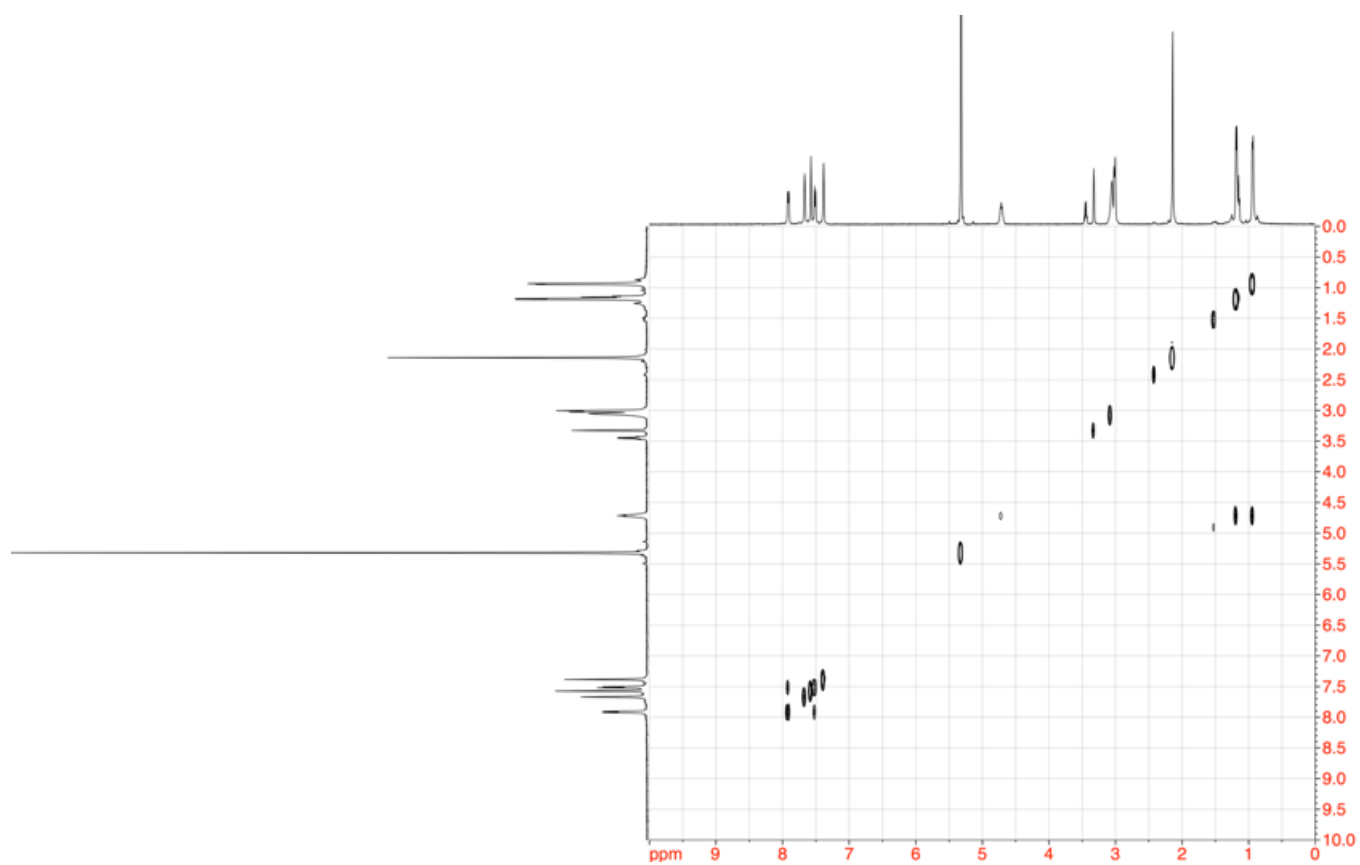

Supplementary Figure 60. <sup>1</sup>H-<sup>1</sup>H COSY NMR spectrum of **3c** (500 MHz, CD<sub>2</sub>Cl<sub>2</sub>/CD<sub>3</sub>OD = 9:1, v:v; 300 K)

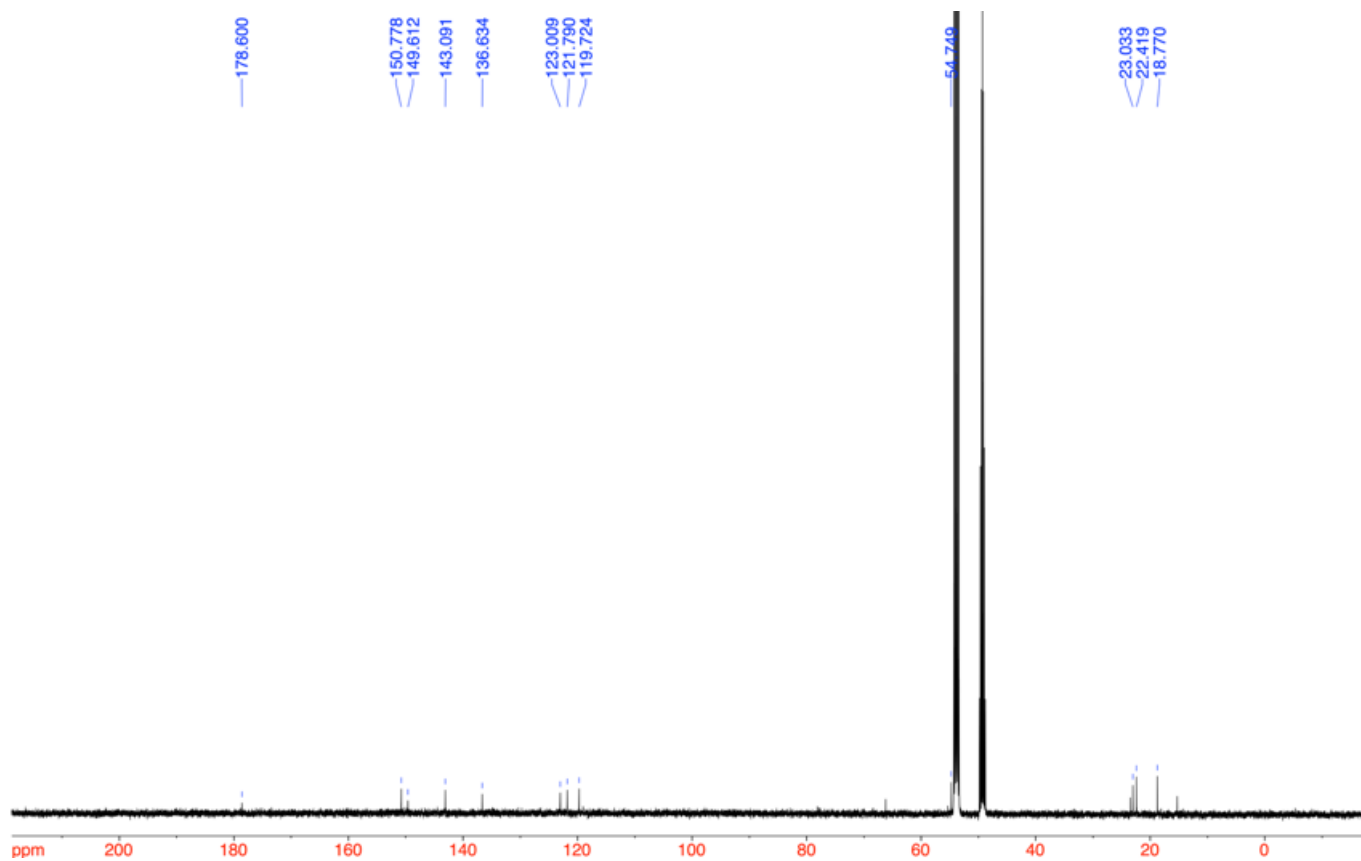

Supplementary Figure 61.  $^{13}\text{C}$  NMR spectrum of **3c** (126 MHz,  $\text{CD}_2\text{Cl}_2/\text{CD}_3\text{OD} = 9:1$ , v:v; 300 K)

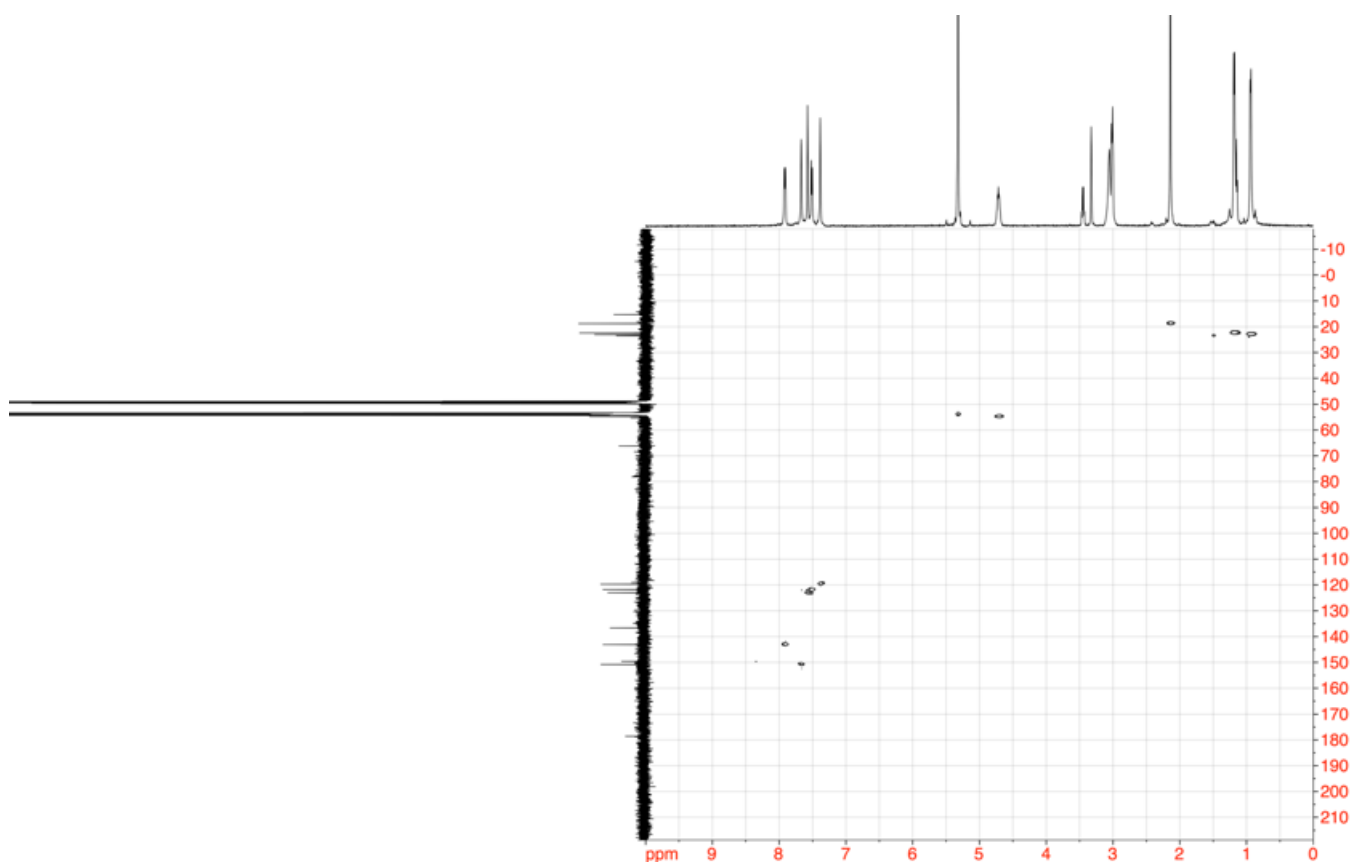

Supplementary Figure 62.  $^1\text{H}$ - $^{13}\text{C}$  HSQC spectrum of **3c** ( $\text{CD}_2\text{Cl}_2/\text{CD}_3\text{OD} = 9:1$ , v:v; 300 K)

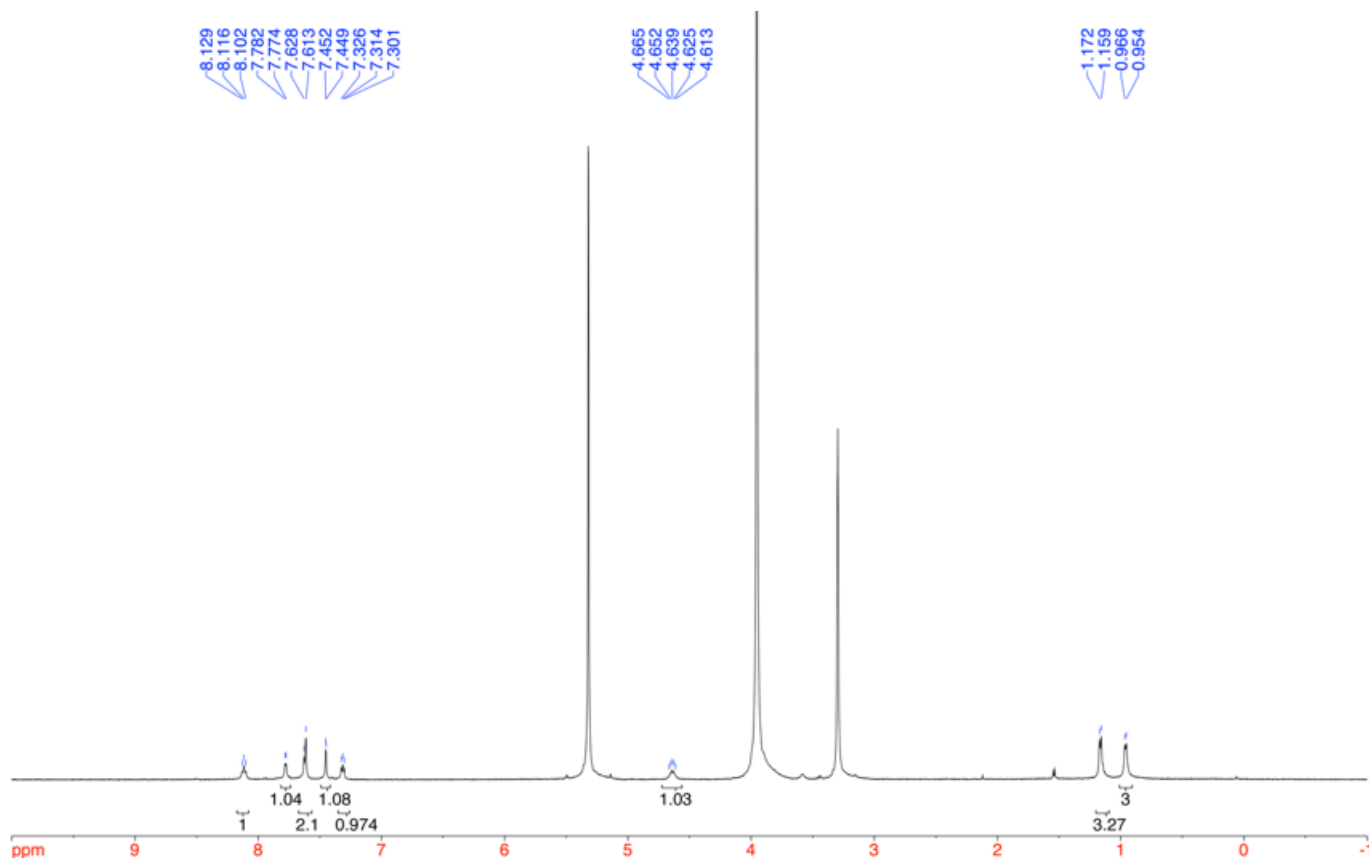

Supplementary Figure 63.  $^1\text{H}$  NMR spectrum of **3d** (500 MHz,  $\text{CD}_2\text{Cl}_2/\text{CD}_3\text{OD} = 3:1$ , v:v; 300 K)

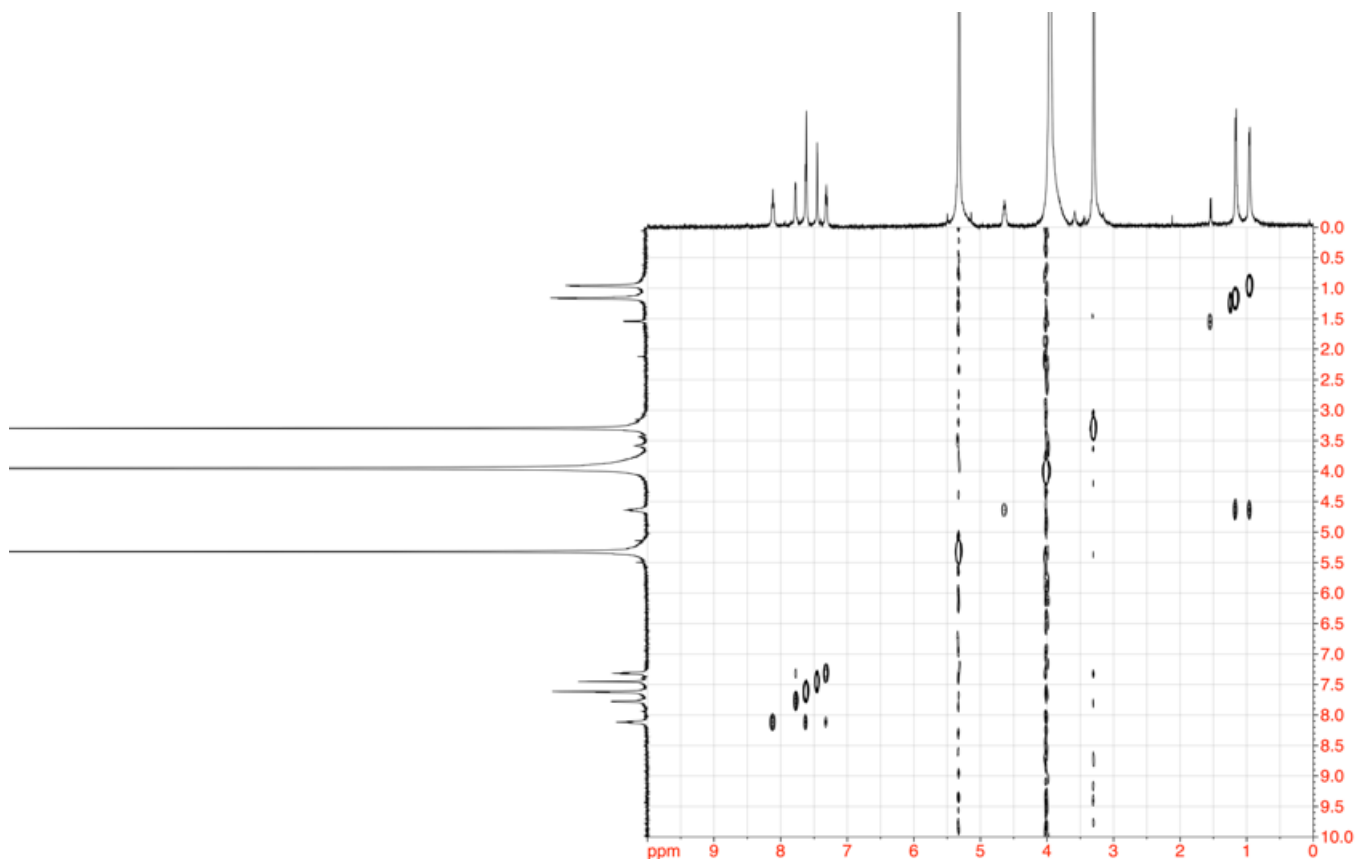

Supplementary Figure 64.  $^1\text{H}$ - $^1\text{H}$  COSY NMR spectrum of **3d** (500 MHz,  $\text{CD}_2\text{Cl}_2/\text{CD}_3\text{OD} = 3:1$ , v:v; 300 K)



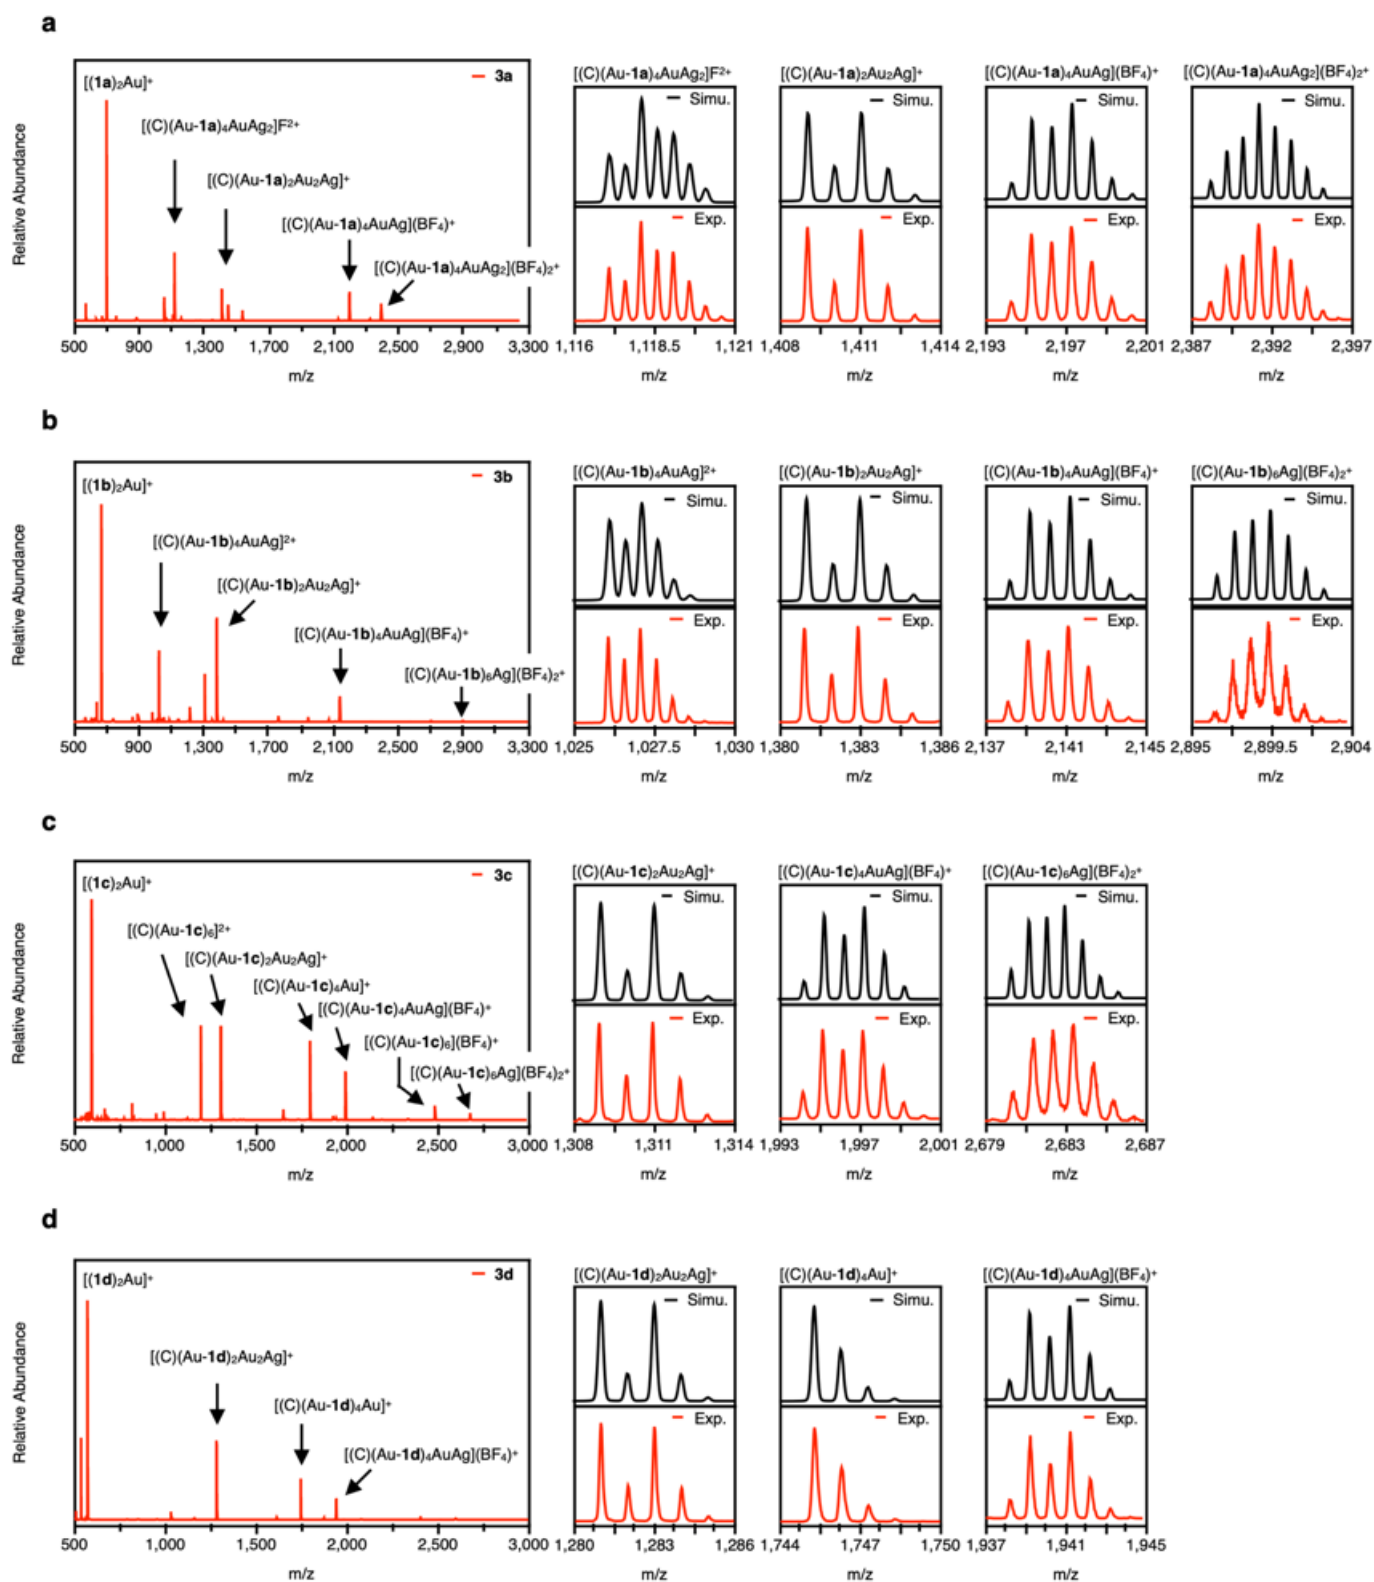

Supplementary Figure 65. MS spectra of **3a** (a) in  $\text{CH}_2\text{Cl}_2/\text{CH}_3\text{OH}$  (9:1, v:v), and **3b** (b), **3c** (c) and **3d** (d) in  $\text{CH}_2\text{Cl}_2$

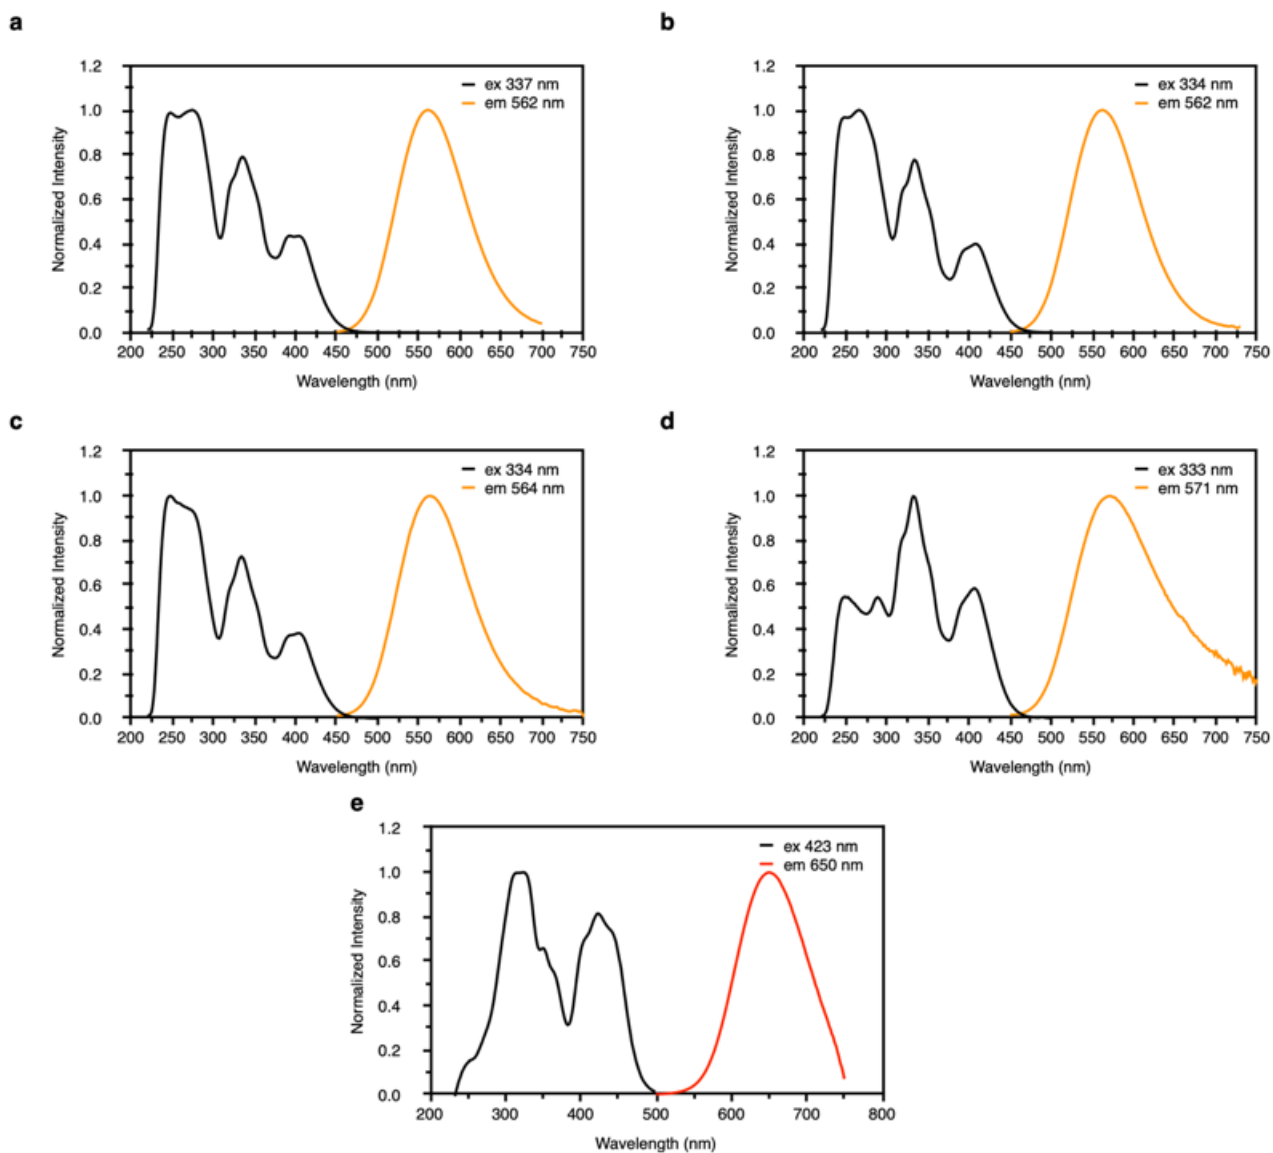

Supplementary Figure 66. Excitation and emission spectra of **3a** (a), **3b** (b), **3c** (c) and **4** (e) in  $\text{CH}_2\text{Cl}_2$ , and **3d** (d) in  $\text{CH}_2\text{Cl}_2/\text{CH}_3\text{OH}$  (9:1, v:v; 293 K).

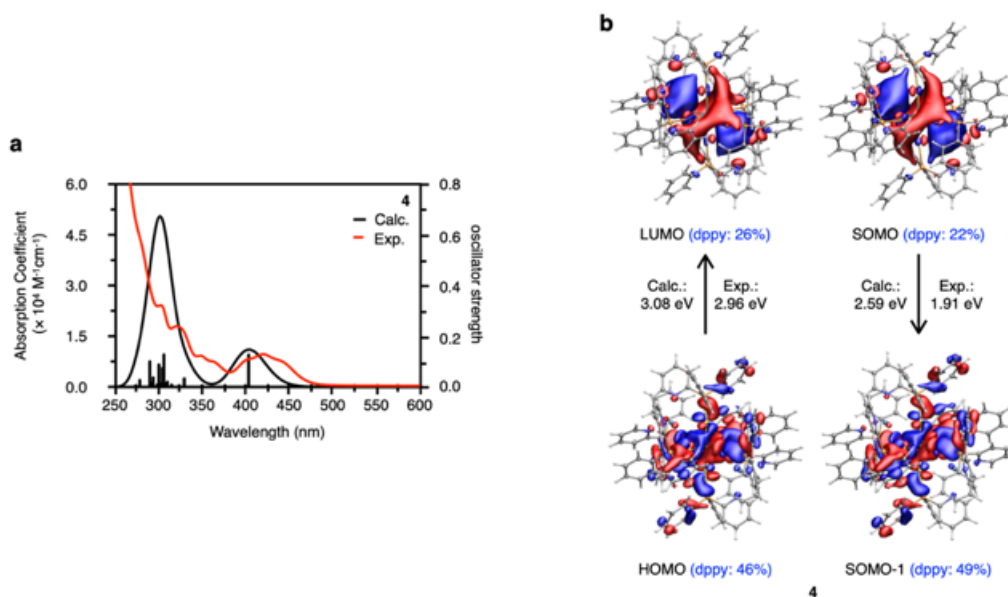

Supplementary Fig. 67. TD-DFT calculations for  $\text{CAu}^{16}\text{Ag}^{12}$  cluster **4**. **a**, Calculated and experimental absorption spectra (calc.  $\epsilon_{402} = 1.1 \times 10^4 \text{ M}^{-1}\text{cm}^{-1}$ , exp.  $\epsilon_{420} = 1.0 \times 10^4 \text{ M}^{-1}\text{cm}^{-1}$ ). **b**, Calculated molecular orbitals, singly occupied molecular orbitals (SOMO, in the triplet state), comparisons of calculated and experimental transition energies, and analysis of orbital composition by Mulliken partition of ligands.

Supplementary Table 18. Excited states of **3b** with oscillator strength ( $f$ ) larger than 0.02

| State number | $\lambda$ (nm) | $\Delta E$ (eV) | $f$   | Transition character                         |
|--------------|----------------|-----------------|-------|----------------------------------------------|
| 4            | 399            | 3.108           | 0.020 | H-1 $\rightarrow$ L                          |
| 5            | 395            | 3.140           | 0.026 | H-2 $\rightarrow$ L                          |
| 6            | 387            | 3.204           | 0.324 | H $\rightarrow$ L                            |
| 25           | 331            | 3.742           | 0.039 | H-1 $\rightarrow$ L+1, H $\rightarrow$ L+1   |
| 26           | 330            | 3.753           | 0.030 | H-1 $\rightarrow$ L+2, H $\rightarrow$ L+2   |
| 30           | 329            | 3.770           | 0.141 | H-2 $\rightarrow$ L+1, H-1 $\rightarrow$ L+2 |
| 31           | 328            | 3.781           | 0.113 | H-1 $\rightarrow$ L+1                        |
| 34           | 326            | 3.803           | 0.130 | H-2 $\rightarrow$ L+1, H-1 $\rightarrow$ L+2 |
| 35           | 325            | 3.815           | 0.117 | H-2 $\rightarrow$ L+2                        |
| 51           | 317            | 3.908           | 0.035 | H $\rightarrow$ L+6                          |
| 84           | 310            | 4.000           | 0.068 | H $\rightarrow$ L+7                          |
| 86           | 309            | 4.011           | 0.072 | H $\rightarrow$ L+8                          |
| 87           | 309            | 4.016           | 0.058 | H-2 $\rightarrow$ L+7, H-1 $\rightarrow$ L+7 |
| 88           | 308            | 4.021           | 0.024 | H-1 $\rightarrow$ L+7                        |
| 90           | 307            | 4.032           | 0.076 | H-12 $\rightarrow$ L, H-2 $\rightarrow$ L+7  |
| 94           | 306            | 4.046           | 0.061 | H-13 $\rightarrow$ L, H-2 $\rightarrow$ L+8  |
| 95           | 306            | 4.057           | 0.036 | H-12 $\rightarrow$ L                         |
| 96           | 305            | 4.065           | 0.050 | H-13 $\rightarrow$ L, H-2 $\rightarrow$ L+8  |
| 122          | 289            | 4.287           | 0.056 | H-18 $\rightarrow$ L, H-3 $\rightarrow$ L+1  |
| 124          | 289            | 4.292           | 0.025 | H-1 $\rightarrow$ L+11                       |
| 125          | 289            | 4.297           | 0.026 | H-17 $\rightarrow$ L                         |
| 139          | 285            | 4.344           | 0.042 | H-18 $\rightarrow$ L                         |
| 141          | 285            | 4.350           | 0.026 | H $\rightarrow$ L+12                         |
| 143          | 285            | 4.352           | 0.034 | H $\rightarrow$ L+12                         |
| 172          | 280            | 4.430           | 0.026 | H-2 $\rightarrow$ L+13                       |

Supplementary Table 19. Excited states of **3d** with oscillator strength ( $f$ ) larger than 0.02

| State number | $\lambda$ (nm) | $\Delta E$ (eV) | $f$   | Transition character                           |
|--------------|----------------|-----------------|-------|------------------------------------------------|
| 6            | 388            | 3.198           | 0.220 | H $\rightarrow$ L                              |
| 17           | 332            | 3.732           | 0.020 | H-2 $\rightarrow$ L+2, H-1 $\rightarrow$ L+1   |
| 21           | 330            | 3.761           | 0.163 | H-2 $\rightarrow$ L+1, H-1 $\rightarrow$ L+2   |
| 23           | 328            | 3.778           | 0.087 | H $\rightarrow$ L+2                            |
| 24           | 328            | 3.779           | 0.086 | H-2 $\rightarrow$ L+2, H-1 $\rightarrow$ L+1   |
| 40           | 317            | 3.915           | 0.020 | H $\rightarrow$ L+5                            |
| 66           | 302            | 4.105           | 0.066 | H-1 $\rightarrow$ L+8                          |
| 67           | 302            | 4.106           | 0.066 | H-2 $\rightarrow$ L+8, H-1 $\rightarrow$ L+7   |
| 117          | 281            | 4.413           | 0.041 | H-8 $\rightarrow$ L                            |
| 118          | 281            | 4.417           | 0.039 | H-9 $\rightarrow$ L                            |
| 136          | 276            | 4.492           | 0.027 | H-2 $\rightarrow$ L+12, H-1 $\rightarrow$ L+13 |
| 137          | 276            | 4.493           | 0.025 | H-2 $\rightarrow$ L+13, H-1 $\rightarrow$ L+12 |
| 183          | 259            | 4.785           | 0.043 | H-6 $\rightarrow$ L+3, H-5 $\rightarrow$ L+3   |
| 184          | 259            | 4.787           | 0.051 | H-6 $\rightarrow$ L+4                          |
| 185          | 259            | 4.793           | 0.056 | H-9 $\rightarrow$ L+2, H-5 $\rightarrow$ L+6   |

Supplementary Table 20. Excited states of **4** with oscillator strength ( $f$ ) larger than 0.02

| State number | $\lambda$ (nm) | $\Delta E$ (eV) | $f$   | Transition character                         |
|--------------|----------------|-----------------|-------|----------------------------------------------|
| 4            | 403            | 3.079           | 0.130 | H $\rightarrow$ L                            |
| 31           | 329            | 3.770           | 0.036 | H-5 $\rightarrow$ L                          |
| 32           | 329            | 3.773           | 0.036 | H-6 $\rightarrow$ L                          |
| 64           | 309            | 4.006           | 0.024 | H-1 $\rightarrow$ L+1, H-2 $\rightarrow$ L+1 |
| 65           | 309            | 4.008           | 0.023 | H-1 $\rightarrow$ L+2                        |
| 78           | 305            | 4.059           | 0.131 | H $\rightarrow$ L+3                          |
| 82           | 304            | 4.081           | 0.078 | H-20 $\rightarrow$ L                         |
| 91           | 300            | 4.133           | 0.088 | H-1 $\rightarrow$ L+3, H $\rightarrow$ L+7   |
| 92           | 300            | 4.138           | 0.091 | H $\rightarrow$ L+8, H-2 $\rightarrow$ L+3   |
| 114          | 293            | 4.231           | 0.040 | H-1 $\rightarrow$ L+7, H-26 $\rightarrow$ L  |
| 133          | 289            | 4.286           | 0.104 | H-1 $\rightarrow$ L+8, H-2 $\rightarrow$ L+7 |
| 166          | 278            | 4.461           | 0.025 | H-3 $\rightarrow$ L+4                        |
| 168          | 278            | 4.465           | 0.022 | H-3 $\rightarrow$ L+6                        |
| 169          | 278            | 4.466           | 0.031 | H-4 $\rightarrow$ L+4                        |

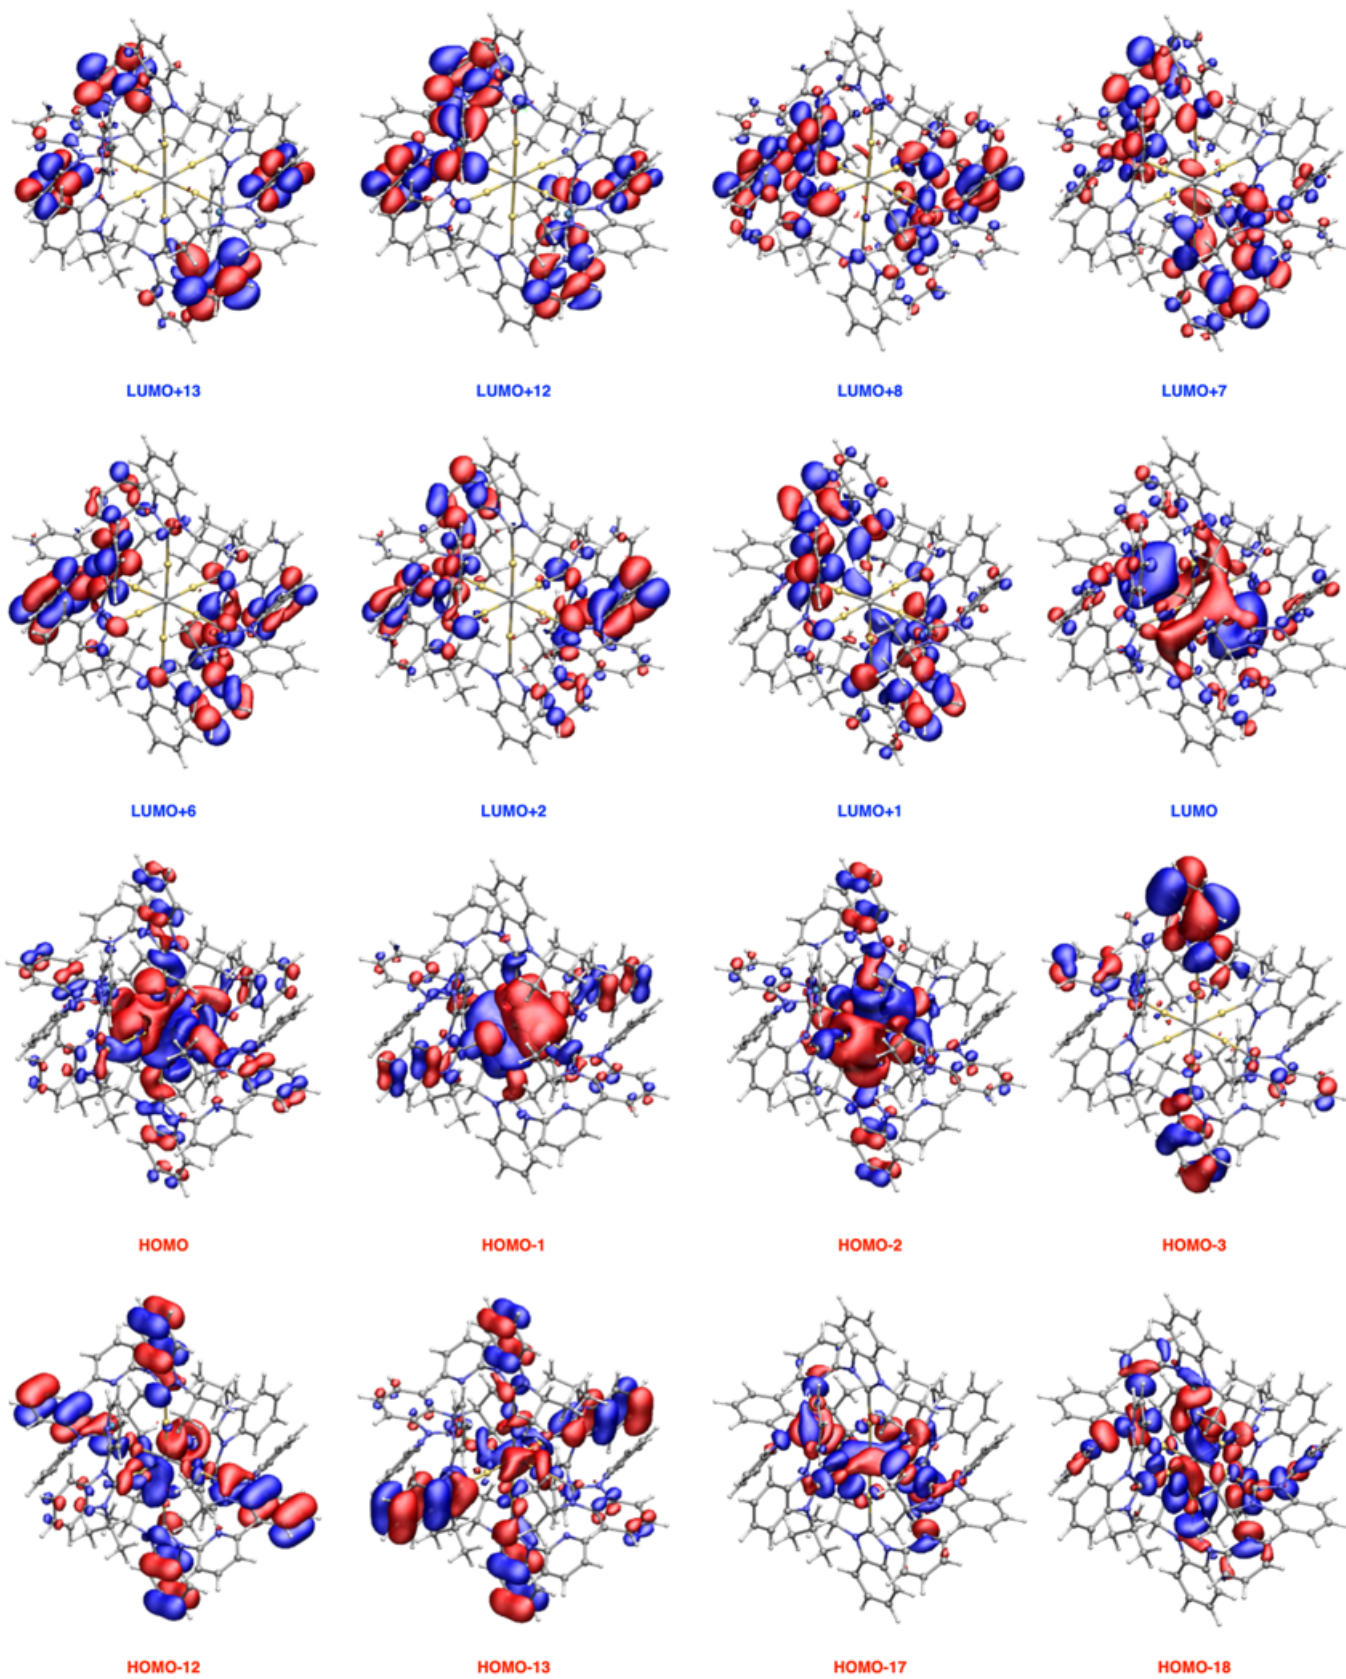

Supplementary Figure 68. Involved molecular orbitals of **3b** (isovalue = |0.02|)

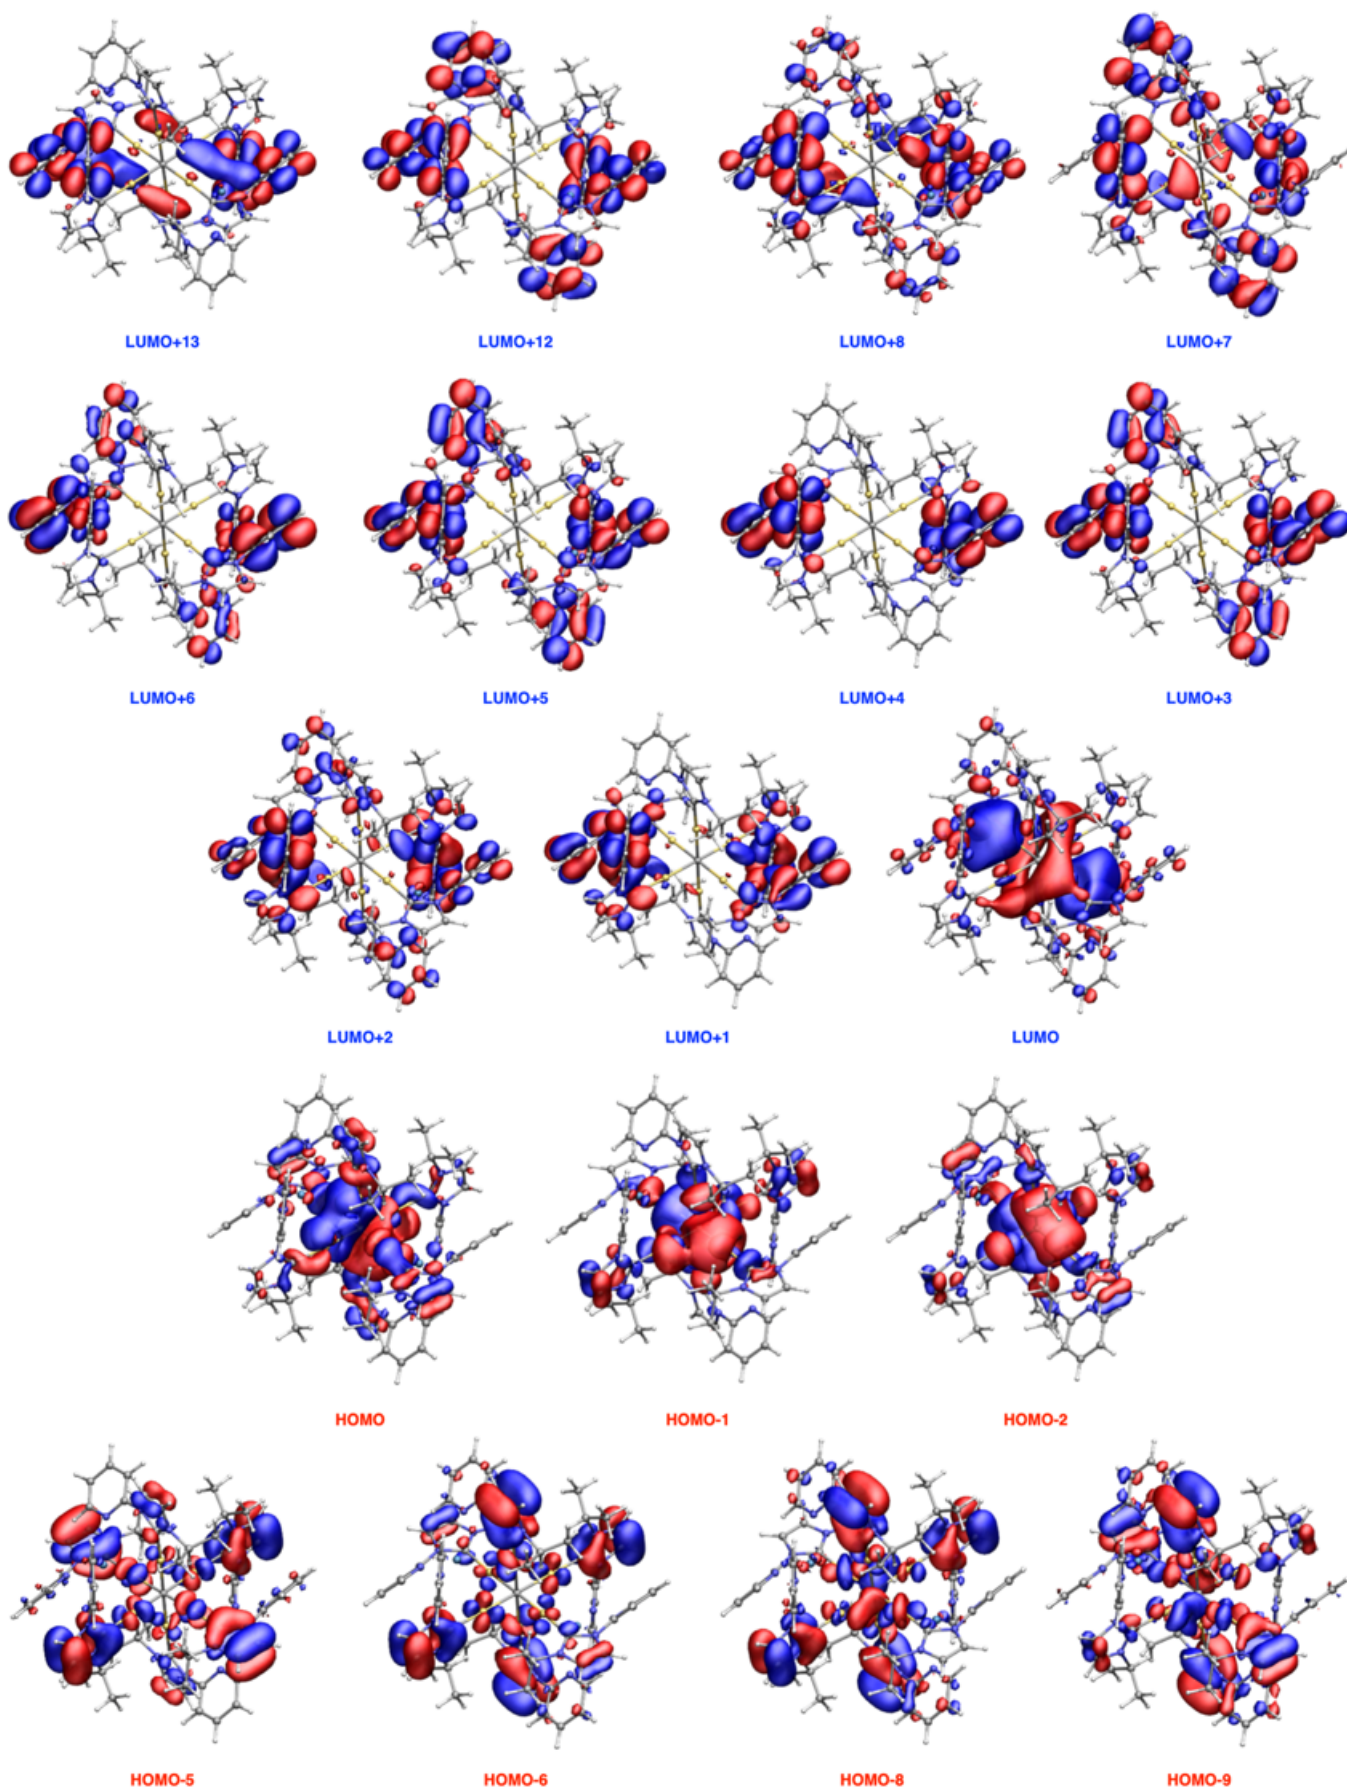

Supplementary Figure 69. Involved molecular orbitals of **3d** (isovalue = |0.02|)

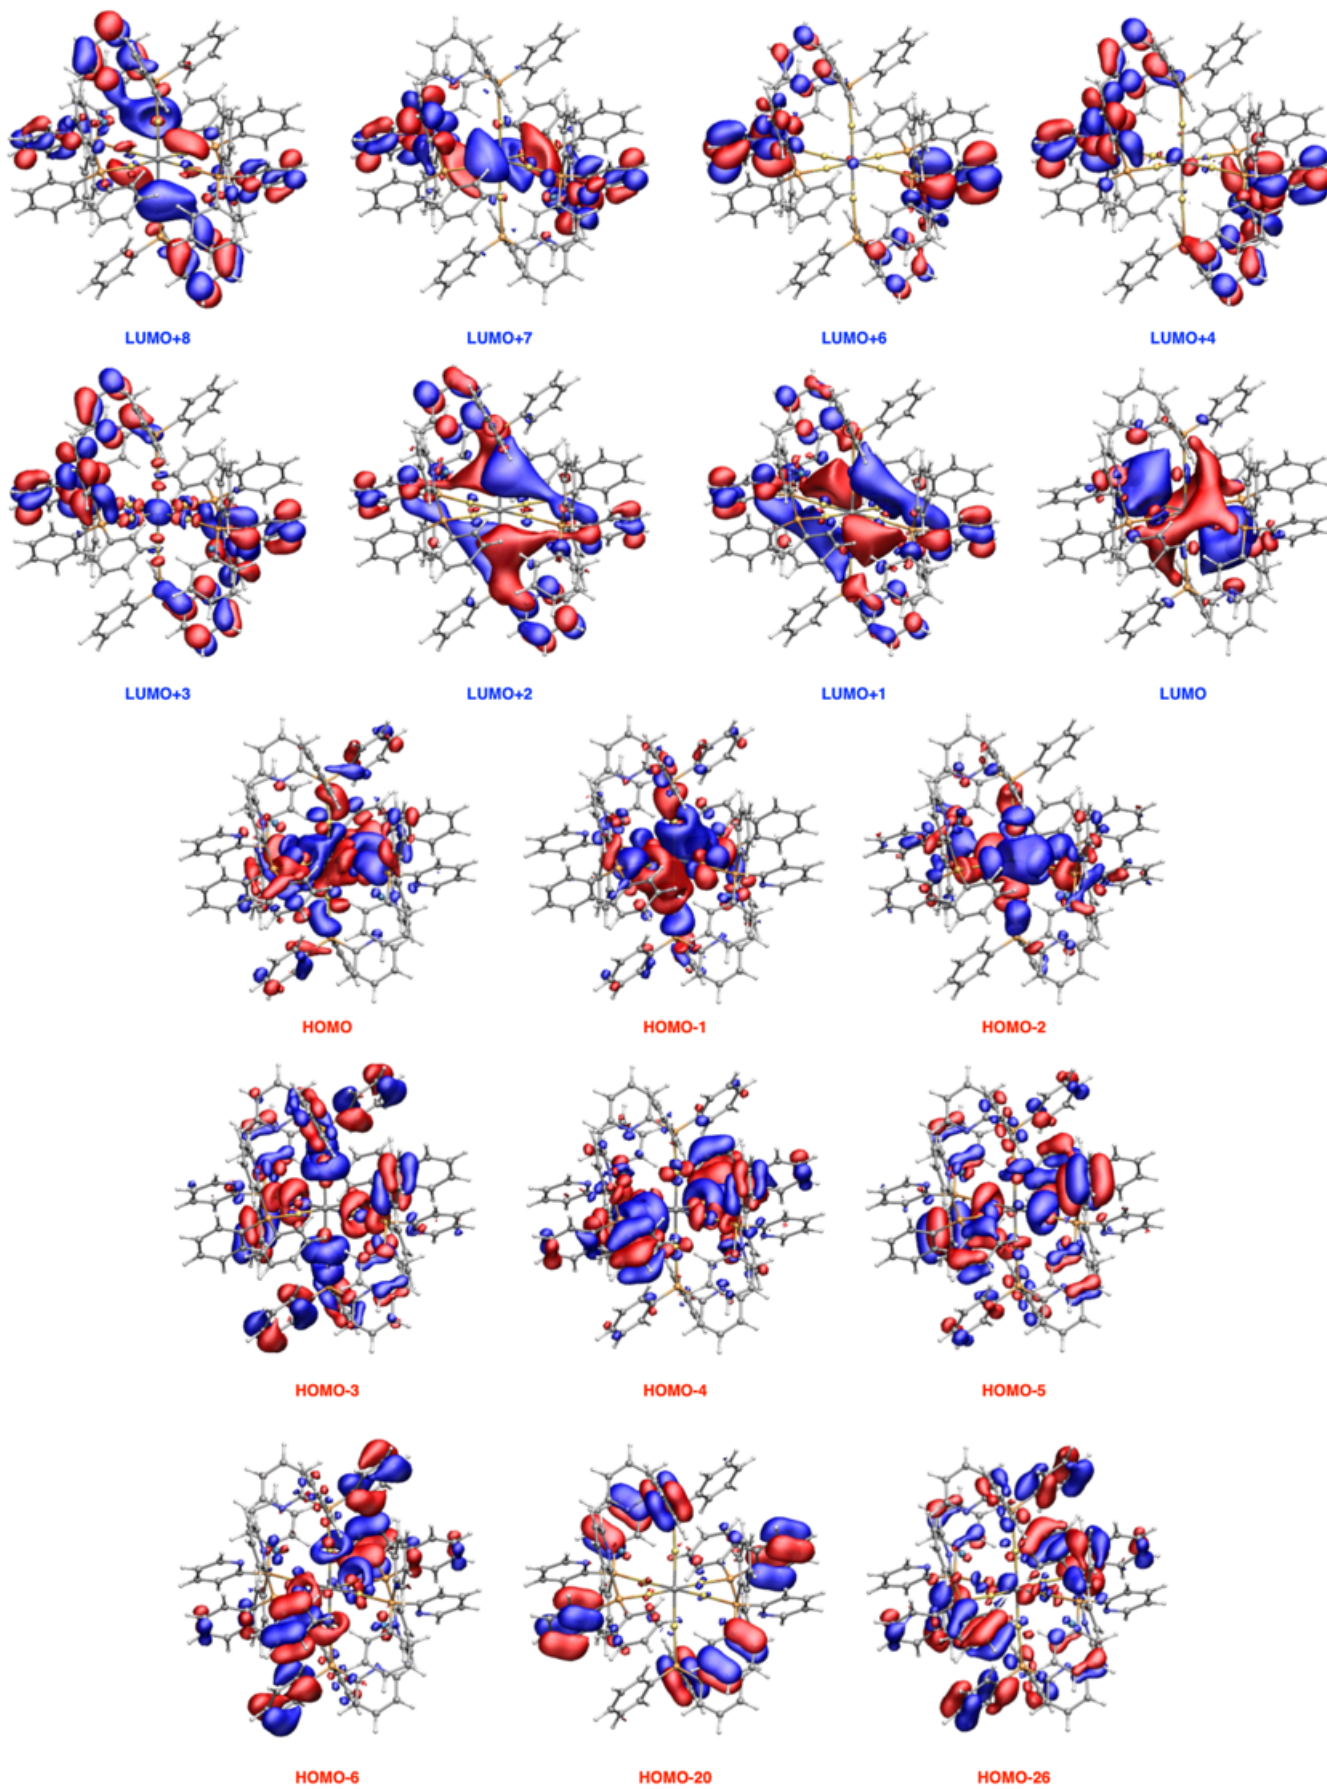

Supplementary Figure 70. Involved molecular orbitals of **4** (isovalue = |0.02|)

Supplementary Table 21. Phosphorescence energies of **3b**, **3d** and **4** by the DFT calculations with the non-equilibrium scheme of IEF-PCM ( $\text{CH}_2\text{Cl}_2$ )

| Compound  | Calculation (IEF-PCM/B3LYP) |      |                 |      | Experiment |      |
|-----------|-----------------------------|------|-----------------|------|------------|------|
|           | LanL2DZ, 6-31G(d)           |      | SDD, 6-311+G(d) |      | (eV)       | (nm) |
|           | (eV)                        | (nm) | (eV)            | (nm) |            |      |
| <b>3b</b> | 2.09                        | 592  | 2.02            | 614  | 2.21       | 562  |
| <b>3d</b> | 2.08                        | 596  | 2.00            | 619  | 2.17       | 571  |
| <b>4</b>  | 2.59                        | 479  | 2.52            | 492  | 1.91       | 650  |

Supplementary Table 22. Phosphorescence energies of **4** by the DFT calculations with different basis set and/or functionals

|                   | PCM/B3LYP |      | PCM/B3LYP-D3 |      | PCM/M06 |      |
|-------------------|-----------|------|--------------|------|---------|------|
|                   | (eV)      | (nm) | (eV)         | (nm) | (eV)    | (nm) |
| LanL2DZ, 3-21G    | -         | -    | 1.03         | 1205 | 2.51    | 493  |
| LanL2DZ, 6-31G(d) | 2.59      | 479  | 1.21         | 1027 | -       | -    |
| SDD, 6-311+G(d)   | 2.52      | 492  | -            | -    | -       | -    |

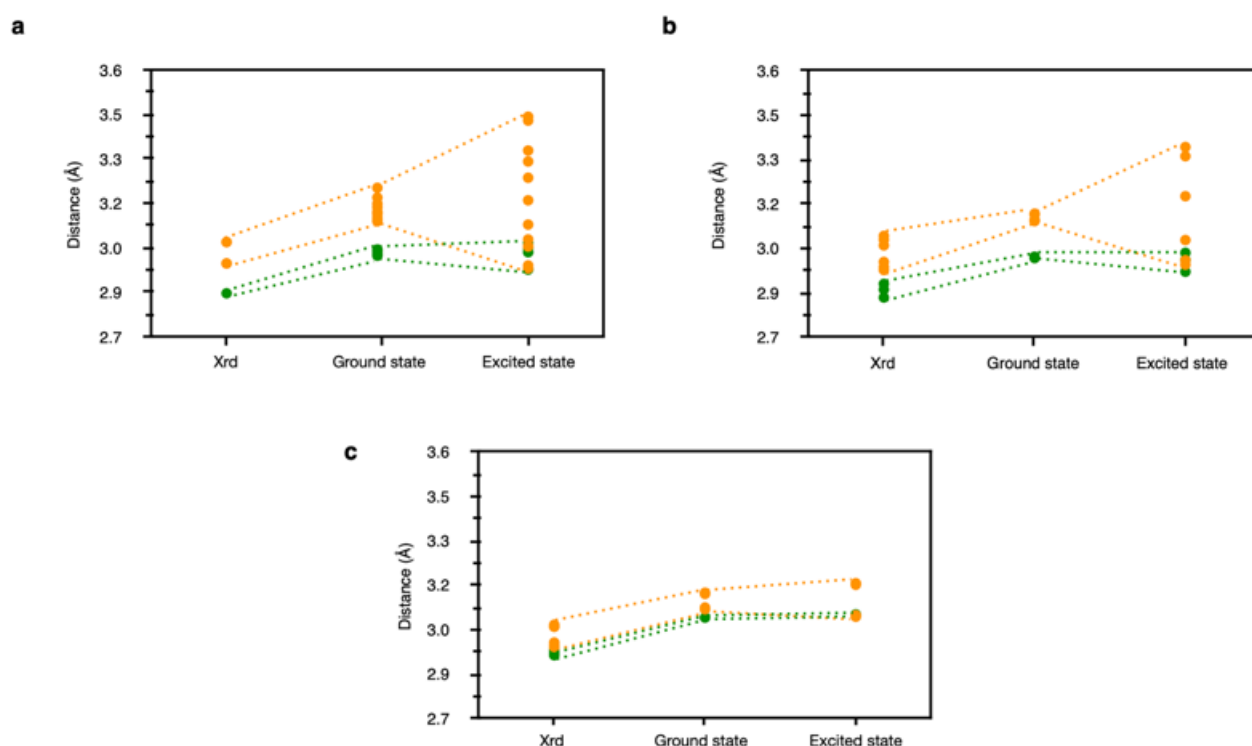

Supplementary Figure 71. Au–Au (orange) and Au–Ag (green) distances of **3b** (a), **3d** (b) and **4** (c) in XRD, ground state and excited state structures



Supplementary Table 23. Key structural parameters of **3b**, **3d** and **4** in XRD, ground state and excited state structures (Å)

|           |                      | XRD                       | Ground state  | Excited state |
|-----------|----------------------|---------------------------|---------------|---------------|
| <b>3d</b> | <b>Au–Au</b>         | 2.9269 (4) – 3.0423 (4)   | 3.092 – 3.117 | 2.945 – 3.311 |
|           | <b>Au–Ag</b>         | 2.8334 (5) – 2.8796 (5)   | 2.967 – 2.972 | 2.921 – 2.985 |
|           | <b>Au–C (center)</b> | 2.1074 (3) – 2.1116 (3)   | 2.195 – 2.196 | 2.187 – 2.254 |
|           | <b>Au–C (ligand)</b> | 2.021 (8) – 2.038 (7)     | 2.07          | 2.057 – 2.071 |
|           | <b>Ag–N</b>          | 2.333 (6) – 2.420 (6)     | 2.498 – 2.500 | 2.497 – 2.652 |
| <b>3b</b> | <b>Au–Au</b>         | 2.9474 (10) – 3.0200 (11) | 3.090 – 3.203 | 2.931 – 3.443 |
|           | <b>Au–Ag</b>         | 2.8467 (17)               | 2.974 – 2.995 | 2.927 – 3.017 |
|           | <b>Au–C (center)</b> | 2.1100 (6)                | 2.204 – 2.220 | 2.184 – 2.291 |
|           | <b>Au–C (ligand)</b> | 2.00 (2)                  | 2.081 – 2.089 | 2.072 – 2.091 |
|           | <b>Ag–N</b>          | 2.337 (10) – 2.34 (2)     | 2.459 – 2.477 | 2.467 – 2.579 |
| <b>4</b>  | <b>Au–Au</b>         | 2.9406 (5) – 3.0164 (5)   | 3.068 – 3.124 | 3.043 – 3.156 |
|           | <b>Au–Ag</b>         | 2.9134 (8) – 2.9316 (8)   | 3.039 – 3.040 | 3.047 – 3.051 |
|           | <b>Au–C (center)</b> | 2.0980 (4) – 2.1144 (4)   | 2.189 – 2.191 | 2.192 – 2.193 |
|           | <b>Au–P</b>          | 2.250 (2) – 2.266 (2)     | 2.371 – 2.372 | 2.367 – 2.368 |
|           | <b>Ag–N</b>          | 2.345 (8) – 2.356 (8)     | 2.472 – 2.476 | 2.522 – 2.524 |

Supplementary Table 24. Orbital composition analysis of **3b** with Mulliken partition

| Number and type of atom | Singlet       |               | Triplet       |               |
|-------------------------|---------------|---------------|---------------|---------------|
|                         | HOMO          | LUMO          | SOMO-1        | SOMO          |
| <b>5(C)</b>             | <b>20.83%</b> | <b>0.25%</b>  | <b>25.01%</b> | <b>0.79%</b>  |
| <b>Au6</b>              |               |               |               |               |
| 1                       | 6.70%         | 6.46%         | 6.37%         | 7.82%         |
| 32                      | 7.03%         | 5.66%         | 6.63%         | 6.99%         |
| 66                      | 6.34%         | 4.70%         | 8.08%         | 5.66%         |
| 169                     | 6.56%         | 5.79%         | 8.20%         | 6.52%         |
| 135                     | 6.77%         | 5.29%         | 6.73%         | 6.28%         |
| 100                     | 6.79%         | 5.32%         | 6.29%         | 6.75%         |
| <b>sum</b>              | <b>40.18%</b> | <b>33.21%</b> | <b>42.31%</b> | <b>40.02%</b> |
| <b>Ag2</b>              |               |               |               |               |
| 2                       | 1.57%         | 15.61%        | 0.33%         | 16.07%        |
| 101                     | 1.53%         | 15.69%        | 0.32%         | 15.91%        |
| <b>sum</b>              | <b>3.09%</b>  | <b>31.30%</b> | <b>0.65%</b>  | <b>31.98%</b> |
| <b>Ligands</b>          |               |               |               |               |
| 3(N)                    | 0.30%         | 0.30%         | 0.58%         | 0.34%         |
| 4(N)                    | 0.32%         | 0.42%         | 0.21%         | 0.42%         |
| 6(C)                    | 1.44%         | 0.89%         | 0.69%         | 0.85%         |
| 7(C)                    | 0.59%         | 0.03%         | 0.98%         | 0.06%         |
| 8(C)                    | 0.61%         | 0.05%         | 1.03%         | 0.08%         |
| 9(C)                    | 0.03%         | 0.18%         | 0.10%         | 0.11%         |

|            |              |              |              |              |
|------------|--------------|--------------|--------------|--------------|
| 10(H)      | 0.00%        | 0.00%        | 0.00%        | 0.00%        |
| 11(C)      | 0.54%        | 0.18%        | 0.77%        | 0.15%        |
| 12(H)      | 0.00%        | 0.00%        | 0.00%        | 0.00%        |
| 13(C)      | 0.50%        | 0.11%        | 1.11%        | 0.11%        |
| 14(H)      | 0.00%        | 0.00%        | 0.00%        | 0.00%        |
| 15(C)      | 0.03%        | 0.23%        | 0.02%        | 0.14%        |
| 16(H)      | 0.00%        | 0.00%        | 0.00%        | 0.00%        |
| 17(C)      | 0.05%        | 0.14%        | 0.00%        | 0.08%        |
| 18(H)      | 0.00%        | 0.01%        | 0.00%        | 0.01%        |
| 19(C)      | 0.07%        | 0.45%        | 0.01%        | 0.23%        |
| 20(N)      | 0.27%        | 0.80%        | 0.06%        | 0.61%        |
| 21(C)      | 0.01%        | 0.48%        | 0.02%        | 0.26%        |
| 22(H)      | 0.01%        | 0.02%        | 0.00%        | 0.02%        |
| 23(C)      | 0.08%        | 0.08%        | 0.00%        | 0.03%        |
| 24(H)      | 0.00%        | 0.02%        | 0.00%        | 0.01%        |
| 25(C)      | 0.02%        | 0.82%        | 0.01%        | 0.34%        |
| 26(H)      | 0.00%        | 0.00%        | 0.00%        | 0.00%        |
| 27(C)      | 0.02%        | 0.15%        | 0.02%        | 0.20%        |
| 28(C)      | 0.01%        | 0.02%        | 0.04%        | 0.01%        |
| 29(H)      | 0.00%        | 0.01%        | 0.00%        | 0.02%        |
| 30(H)      | 0.00%        | 0.01%        | 0.00%        | 0.01%        |
| 31(H)      | 0.00%        | 0.00%        | 0.00%        | 0.00%        |
| 202(H)     | 0.00%        | 0.22%        | 0.00%        | 0.17%        |
| 203(C)     | 0.02%        | 0.05%        | 0.02%        | 0.05%        |
| 204(H)     | 0.00%        | 0.00%        | 0.00%        | 0.00%        |
| 205(H)     | 0.00%        | 0.00%        | 0.00%        | 0.00%        |
| 206(H)     | 0.00%        | 0.01%        | 0.00%        | 0.01%        |
| <b>sum</b> | <b>4.95%</b> | <b>5.68%</b> | <b>5.68%</b> | <b>4.34%</b> |
| 33(N)      | 0.45%        | 0.37%        | 0.22%        | 0.41%        |
| 34(N)      | 0.45%        | 0.50%        | 0.19%        | 0.51%        |
| 35(C)      | 1.71%        | 0.97%        | 0.98%        | 0.94%        |
| 36(C)      | 0.95%        | 0.03%        | 0.47%        | 0.07%        |
| 37(C)      | 0.96%        | 0.09%        | 0.43%        | 0.13%        |
| 38(C)      | 0.04%        | 0.20%        | 0.03%        | 0.13%        |
| 39(H)      | 0.00%        | 0.00%        | 0.00%        | 0.00%        |
| 40(C)      | 0.86%        | 0.20%        | 0.36%        | 0.17%        |
| 41(H)      | 0.00%        | 0.00%        | 0.00%        | 0.00%        |
| 42(C)      | 0.84%        | 0.13%        | 0.46%        | 0.14%        |
| 43(H)      | 0.00%        | 0.00%        | 0.00%        | 0.00%        |
| 44(C)      | 0.04%        | 0.26%        | 0.02%        | 0.15%        |
| 45(H)      | 0.00%        | 0.00%        | 0.00%        | 0.00%        |
| 46(C)      | 0.06%        | 0.14%        | 0.01%        | 0.08%        |
| 47(H)      | 0.00%        | 0.01%        | 0.00%        | 0.01%        |
| 48(C)      | 0.07%        | 0.47%        | 0.00%        | 0.23%        |
| 49(N)      | 0.24%        | 0.81%        | 0.01%        | 0.61%        |

|            |              |              |              |              |
|------------|--------------|--------------|--------------|--------------|
| 50(C)      | 0.01%        | 0.46%        | 0.01%        | 0.24%        |
| 51(H)      | 0.01%        | 0.02%        | 0.00%        | 0.02%        |
| 52(C)      | 0.08%        | 0.09%        | 0.00%        | 0.03%        |
| 53(H)      | 0.00%        | 0.02%        | 0.00%        | 0.01%        |
| 54(C)      | 0.02%        | 0.84%        | 0.00%        | 0.33%        |
| 55(H)      | 0.00%        | 0.00%        | 0.00%        | 0.00%        |
| 56(C)      | 0.02%        | -0.01%       | 0.03%        | -0.01%       |
| 57(H)      | 0.00%        | 0.00%        | 0.02%        | 0.00%        |
| 58(C)      | 0.03%        | 0.02%        | 0.14%        | 0.03%        |
| 59(H)      | 0.00%        | 0.00%        | 0.01%        | 0.01%        |
| 60(H)      | 0.00%        | 0.00%        | 0.01%        | 0.00%        |
| 61(H)      | 0.01%        | 0.01%        | 0.02%        | 0.02%        |
| 62(C)      | 0.02%        | 0.23%        | 0.07%        | 0.21%        |
| 63(H)      | 0.00%        | 0.06%        | 0.00%        | 0.07%        |
| 64(H)      | 0.00%        | 0.03%        | 0.02%        | 0.02%        |
| 65(H)      | 0.00%        | 0.02%        | 0.01%        | 0.01%        |
| <b>sum</b> | <b>6.89%</b> | <b>5.99%</b> | <b>3.52%</b> | <b>4.60%</b> |
| 67(N)      | 0.40%        | 0.26%        | 0.42%        | 0.36%        |
| 68(N)      | 0.43%        | 0.41%        | 0.43%        | 0.44%        |
| 69(C)      | 1.19%        | 0.74%        | 1.26%        | 1.28%        |
| 70(C)      | 0.88%        | 0.02%        | 1.09%        | 0.07%        |
| 71(C)      | 0.90%        | 0.09%        | 1.08%        | 0.15%        |
| 72(C)      | 0.04%        | 0.15%        | 0.04%        | 0.11%        |
| 73(H)      | 0.00%        | 0.00%        | 0.00%        | 0.00%        |
| 74(C)      | 0.82%        | 0.17%        | 0.99%        | 0.15%        |
| 75(H)      | 0.00%        | 0.00%        | 0.00%        | 0.00%        |
| 76(C)      | 0.78%        | 0.09%        | 1.03%        | 0.11%        |
| 77(H)      | 0.00%        | 0.00%        | 0.00%        | 0.00%        |
| 78(C)      | 0.04%        | 0.21%        | 0.04%        | 0.13%        |
| 79(H)      | 0.00%        | 0.00%        | 0.00%        | 0.00%        |
| 80(C)      | 0.05%        | 0.14%        | 0.01%        | 0.08%        |
| 81(H)      | 0.00%        | 0.01%        | 0.00%        | 0.01%        |
| 82(C)      | 0.07%        | 0.54%        | 0.01%        | 0.23%        |
| 83(N)      | 0.24%        | 0.86%        | 0.01%        | 0.56%        |
| 84(C)      | 0.01%        | 0.52%        | 0.00%        | 0.25%        |
| 85(H)      | 0.01%        | 0.01%        | 0.00%        | 0.02%        |
| 86(C)      | 0.08%        | 0.12%        | 0.00%        | 0.03%        |
| 87(H)      | 0.00%        | 0.02%        | 0.00%        | 0.01%        |
| 88(C)      | 0.03%        | 0.96%        | 0.00%        | 0.33%        |
| 89(H)      | 0.00%        | 0.00%        | 0.00%        | 0.00%        |
| 90(C)      | 0.02%        | -0.02%       | 0.02%        | -0.01%       |
| 91(H)      | 0.00%        | 0.00%        | 0.00%        | 0.00%        |
| 92(C)      | 0.01%        | 0.05%        | 0.04%        | 0.04%        |
| 93(H)      | 0.00%        | 0.01%        | 0.00%        | 0.01%        |
| 94(H)      | 0.00%        | 0.01%        | 0.02%        | 0.01%        |

|            |              |              |              |              |
|------------|--------------|--------------|--------------|--------------|
| 95(H)      | 0.01%        | 0.04%        | 0.01%        | 0.03%        |
| 96(C)      | 0.04%        | 0.20%        | 0.11%        | 0.22%        |
| 97(H)      | 0.00%        | 0.06%        | 0.01%        | 0.04%        |
| 98(H)      | 0.00%        | 0.02%        | 0.00%        | 0.01%        |
| 99(H)      | 0.00%        | 0.02%        | 0.00%        | 0.02%        |
| <b>sum</b> | <b>6.06%</b> | <b>5.72%</b> | <b>6.65%</b> | <b>4.68%</b> |
| 102(N)     | 0.35%        | 0.32%        | 0.57%        | 0.35%        |
| 103(N)     | 0.39%        | 0.47%        | 0.20%        | 0.45%        |
| 104(C)     | 1.47%        | 0.87%        | 0.81%        | 0.78%        |
| 105(C)     | 0.74%        | 0.03%        | 0.99%        | 0.06%        |
| 106(C)     | 0.76%        | 0.09%        | 1.06%        | 0.12%        |
| 107(C)     | 0.03%        | 0.18%        | 0.09%        | 0.11%        |
| 108(H)     | 0.00%        | 0.00%        | 0.00%        | 0.00%        |
| 109(C)     | 0.70%        | 0.19%        | 0.80%        | 0.15%        |
| 110(H)     | 0.00%        | 0.00%        | 0.00%        | 0.00%        |
| 111(C)     | 0.63%        | 0.12%        | 1.13%        | 0.12%        |
| 112(H)     | 0.00%        | 0.00%        | 0.00%        | 0.00%        |
| 113(C)     | 0.04%        | 0.24%        | 0.02%        | 0.14%        |
| 114(H)     | 0.00%        | 0.00%        | 0.00%        | 0.00%        |
| 115(C)     | 0.05%        | 0.13%        | 0.00%        | 0.08%        |
| 116(H)     | 0.00%        | 0.01%        | 0.00%        | 0.01%        |
| 117(C)     | 0.08%        | 0.51%        | 0.01%        | 0.26%        |
| 118(N)     | 0.30%        | 0.83%        | 0.06%        | 0.62%        |
| 119(C)     | 0.01%        | 0.45%        | 0.02%        | 0.27%        |
| 120(H)     | 0.01%        | 0.02%        | 0.00%        | 0.02%        |
| 121(C)     | 0.08%        | 0.11%        | 0.00%        | 0.03%        |
| 122(H)     | 0.00%        | 0.02%        | 0.00%        | 0.01%        |
| 123(C)     | 0.03%        | 0.86%        | 0.01%        | 0.37%        |
| 124(H)     | 0.00%        | 0.00%        | 0.00%        | 0.00%        |
| 125(C)     | 0.02%        | -0.01%       | 0.02%        | -0.01%       |
| 126(H)     | 0.00%        | 0.00%        | 0.00%        | 0.00%        |
| 127(C)     | 0.01%        | 0.04%        | 0.05%        | 0.03%        |
| 128(H)     | 0.00%        | 0.01%        | 0.00%        | 0.01%        |
| 129(H)     | 0.00%        | 0.01%        | 0.00%        | 0.00%        |
| 130(H)     | 0.01%        | 0.03%        | 0.00%        | 0.02%        |
| 131(C)     | 0.03%        | 0.24%        | 0.02%        | 0.30%        |
| 132(H)     | 0.00%        | 0.09%        | 0.00%        | 0.06%        |
| 133(H)     | 0.00%        | 0.03%        | 0.01%        | 0.02%        |
| 134(H)     | 0.00%        | 0.02%        | 0.00%        | 0.02%        |
| <b>sum</b> | <b>5.75%</b> | <b>5.89%</b> | <b>5.90%</b> | <b>4.41%</b> |
| 136(N)     | 0.37%        | 0.34%        | 0.28%        | 0.40%        |
| 137(N)     | 0.38%        | 0.49%        | 0.21%        | 0.51%        |
| 138(C)     | 1.50%        | 0.93%        | 0.86%        | 0.89%        |
| 139(C)     | 0.75%        | 0.03%        | 0.56%        | 0.06%        |
| 140(C)     | 0.77%        | 0.09%        | 0.52%        | 0.12%        |

|            |              |              |              |              |
|------------|--------------|--------------|--------------|--------------|
| 141(C)     | 0.04%        | 0.18%        | 0.03%        | 0.13%        |
| 142(H)     | 0.00%        | 0.00%        | 0.00%        | 0.00%        |
| 143(C)     | 0.69%        | 0.20%        | 0.43%        | 0.18%        |
| 144(H)     | 0.00%        | 0.00%        | 0.00%        | 0.00%        |
| 145(C)     | 0.65%        | 0.12%        | 0.55%        | 0.13%        |
| 146(H)     | 0.00%        | 0.00%        | 0.00%        | 0.00%        |
| 147(C)     | 0.03%        | 0.25%        | 0.02%        | 0.16%        |
| 148(H)     | 0.00%        | 0.00%        | 0.00%        | 0.00%        |
| 149(C)     | 0.05%        | 0.16%        | 0.01%        | 0.08%        |
| 150(H)     | 0.00%        | 0.01%        | 0.00%        | 0.01%        |
| 151(C)     | 0.06%        | 0.46%        | 0.00%        | 0.21%        |
| 152(N)     | 0.22%        | 0.84%        | 0.01%        | 0.61%        |
| 153(C)     | 0.01%        | 0.55%        | 0.01%        | 0.24%        |
| 154(H)     | 0.01%        | 0.01%        | 0.00%        | 0.02%        |
| 155(C)     | 0.08%        | 0.09%        | 0.01%        | 0.03%        |
| 156(H)     | 0.00%        | 0.01%        | 0.00%        | 0.01%        |
| 157(C)     | 0.02%        | 0.94%        | 0.00%        | 0.34%        |
| 158(H)     | 0.00%        | 0.00%        | 0.00%        | 0.00%        |
| 159(C)     | 0.02%        | -0.01%       | 0.03%        | 0.00%        |
| 160(H)     | 0.00%        | 0.00%        | 0.02%        | 0.00%        |
| 161(C)     | 0.02%        | 0.05%        | 0.17%        | 0.06%        |
| 162(H)     | 0.00%        | 0.01%        | 0.01%        | 0.01%        |
| 163(H)     | 0.00%        | 0.01%        | 0.01%        | 0.01%        |
| 164(H)     | 0.01%        | 0.04%        | 0.01%        | 0.04%        |
| 165(C)     | 0.03%        | 0.22%        | 0.06%        | 0.21%        |
| 166(H)     | 0.00%        | 0.07%        | 0.01%        | 0.06%        |
| 167(H)     | 0.00%        | 0.02%        | 0.02%        | 0.01%        |
| 168(H)     | 0.00%        | 0.02%        | 0.01%        | 0.01%        |
| <b>sum</b> | <b>5.72%</b> | <b>6.13%</b> | <b>3.83%</b> | <b>4.56%</b> |
| 170(N)     | 0.45%        | 0.31%        | 0.40%        | 0.37%        |
| 171(N)     | 0.45%        | 0.45%        | 0.42%        | 0.44%        |
| 172(C)     | 1.35%        | 0.90%        | 1.18%        | 1.30%        |
| 173(C)     | 0.94%        | 0.03%        | 1.07%        | 0.07%        |
| 174(C)     | 0.96%        | 0.09%        | 1.05%        | 0.15%        |
| 175(C)     | 0.04%        | 0.18%        | 0.04%        | 0.11%        |
| 176(H)     | 0.00%        | 0.00%        | 0.00%        | 0.00%        |
| 177(C)     | 0.86%        | 0.19%        | 0.97%        | 0.15%        |
| 178(H)     | 0.00%        | 0.00%        | 0.00%        | 0.00%        |
| 179(C)     | 0.84%        | 0.12%        | 1.01%        | 0.12%        |
| 180(H)     | 0.00%        | 0.00%        | 0.00%        | 0.00%        |
| 181(C)     | 0.04%        | 0.24%        | 0.04%        | 0.13%        |
| 182(H)     | 0.00%        | 0.00%        | 0.00%        | 0.00%        |
| 183(C)     | 0.06%        | 0.14%        | 0.01%        | 0.08%        |
| 184(H)     | 0.00%        | 0.01%        | 0.00%        | 0.01%        |
| 185(C)     | 0.06%        | 0.47%        | 0.01%        | 0.20%        |

|            |              |              |              |              |
|------------|--------------|--------------|--------------|--------------|
| 186(N)     | 0.23%        | 0.79%        | 0.01%        | 0.54%        |
| 187(C)     | 0.01%        | 0.47%        | 0.00%        | 0.21%        |
| 188(H)     | 0.01%        | 0.02%        | 0.00%        | 0.02%        |
| 189(C)     | 0.08%        | 0.09%        | 0.00%        | 0.03%        |
| 190(H)     | 0.00%        | 0.02%        | 0.00%        | 0.01%        |
| 191(C)     | 0.02%        | 0.86%        | 0.00%        | 0.29%        |
| 192(H)     | 0.00%        | 0.00%        | 0.00%        | 0.00%        |
| 193(C)     | 0.02%        | -0.01%       | 0.02%        | -0.01%       |
| 194(C)     | 0.02%        | 0.07%        | 0.05%        | 0.06%        |
| 195(H)     | 0.00%        | 0.01%        | 0.00%        | 0.01%        |
| 196(H)     | 0.00%        | 0.00%        | 0.02%        | 0.00%        |
| 197(H)     | 0.01%        | 0.06%        | 0.00%        | 0.04%        |
| 198(C)     | 0.04%        | 0.23%        | 0.12%        | 0.22%        |
| 199(H)     | 0.00%        | 0.06%        | 0.01%        | 0.04%        |
| 200(H)     | 0.00%        | 0.02%        | 0.00%        | 0.01%        |
| 201(H)     | 0.00%        | 0.02%        | 0.01%        | 0.02%        |
| 207(H)     | 0.00%        | 0.00%        | 0.01%        | 0.00%        |
| <b>sum</b> | <b>5.95%</b> | <b>2.51%</b> | <b>6.17%</b> | <b>2.85%</b> |

Supplementary Table 25. Orbital composition analysis of **3d** with Mulliken partition

| Number and type of atom | Singlet       |               | Triplet       |               |
|-------------------------|---------------|---------------|---------------|---------------|
|                         | HOMO          | LUMO          | SOMO-1        | SOMO          |
| <b>14 (C)</b>           | <b>23.35%</b> | <b>0.17%</b>  | <b>29.28%</b> | <b>0.58%</b>  |
| <b>Au6</b>              |               |               |               |               |
| 1                       | 8.46%         | 7.32%         | 7.56%         | 7.99%         |
| 2                       | 7.54%         | 7.41%         | 9.00%         | 7.86%         |
| 3                       | 7.46%         | 7.22%         | 7.49%         | 8.24%         |
| 87                      | 8.46%         | 7.32%         | 7.56%         | 7.99%         |
| 88                      | 7.54%         | 7.41%         | 9.00%         | 7.86%         |
| 89                      | 7.46%         | 7.22%         | 7.49%         | 8.24%         |
| <b>sum</b>              | <b>46.91%</b> | <b>43.90%</b> | <b>48.09%</b> | <b>48.18%</b> |
| <b>Ag2</b>              |               |               |               |               |
| 4                       | 0.86%         | 14.91%        | 0.35%         | 14.69%        |
| 90                      | 0.86%         | 14.91%        | 0.35%         | 14.69%        |
| <b>sum</b>              | <b>1.73%</b>  | <b>29.82%</b> | <b>0.71%</b>  | <b>29.38%</b> |
| <b>Ligands</b>          |               |               |               |               |
| 8(N)                    | 0.30%         | 0.74%         | 0.07%         | 0.67%         |
| 9(N)                    | 0.45%         | 0.39%         | 0.32%         | 0.40%         |
| 10(N)                   | 0.47%         | 0.32%         | 0.54%         | 0.35%         |
| 42(C)                   | 0.86%         | 0.12%         | 1.01%         | 0.17%         |
| 43(H)                   | 0.01%         | 0.00%         | 0.00%         | 0.00%         |
| 44(C)                   | 0.85%         | 0.19%         | 0.83%         | 0.22%         |

|            |              |              |              |              |
|------------|--------------|--------------|--------------|--------------|
| 45(H)      | 0.02%        | 0.00%        | 0.01%        | 0.01%        |
| 46(C)      | 2.21%        | 0.53%        | 0.75%        | 0.61%        |
| 33(C)      | 0.01%        | 0.42%        | 0.02%        | 0.26%        |
| 34(H)      | 0.01%        | 0.01%        | 0.00%        | 0.02%        |
| 35(C)      | 0.09%        | 0.04%        | 0.01%        | 0.03%        |
| 36(H)      | 0.00%        | 0.02%        | 0.00%        | 0.02%        |
| 37(C)      | 0.02%        | 0.61%        | 0.01%        | 0.30%        |
| 38(H)      | 0.00%        | 0.00%        | 0.00%        | 0.00%        |
| 39(C)      | 0.06%        | 0.17%        | 0.01%        | 0.09%        |
| 40(H)      | 0.00%        | 0.01%        | 0.00%        | 0.01%        |
| 41(C)      | 0.07%        | 0.26%        | 0.01%        | 0.17%        |
| 71(C)      | 0.03%        | 0.14%        | 0.02%        | 0.21%        |
| 72(H)      | 0.00%        | 0.20%        | 0.00%        | 0.16%        |
| 73(C)      | 0.02%        | 0.05%        | 0.02%        | 0.05%        |
| 74(H)      | 0.00%        | 0.02%        | 0.00%        | 0.02%        |
| 75(H)      | 0.00%        | 0.00%        | 0.00%        | 0.00%        |
| 76(H)      | 0.00%        | 0.00%        | 0.00%        | 0.00%        |
| 77(C)      | 0.02%        | 0.01%        | 0.03%        | 0.01%        |
| 78(H)      | 0.00%        | 0.01%        | 0.00%        | 0.01%        |
| 79(H)      | 0.00%        | 0.02%        | 0.00%        | 0.01%        |
| 80(H)      | 0.00%        | 0.00%        | 0.00%        | 0.00%        |
| <b>sum</b> | <b>5.54%</b> | <b>4.28%</b> | <b>3.66%</b> | <b>3.79%</b> |
| 5(N)       | 0.36%        | 0.76%        | 0.03%        | 0.58%        |
| 6(N)       | 0.23%        | 0.40%        | 0.43%        | 0.35%        |
| 7(N)       | 0.25%        | 0.33%        | 0.37%        | 0.32%        |
| 28(C)      | 0.37%        | 0.13%        | 0.83%        | 0.16%        |
| 29(H)      | 0.00%        | 0.00%        | 0.01%        | 0.00%        |
| 30(C)      | 0.43%        | 0.20%        | 0.78%        | 0.20%        |
| 31(H)      | 0.02%        | 0.00%        | 0.00%        | 0.01%        |
| 32(C)      | 1.47%        | 0.55%        | 1.44%        | 0.86%        |
| 15(C)      | 0.01%        | 0.05%        | 0.05%        | 0.04%        |
| 16(H)      | 0.00%        | 0.00%        | 0.01%        | 0.00%        |
| 17(H)      | 0.00%        | 0.00%        | 0.00%        | 0.00%        |
| 18(H)      | 0.00%        | 0.02%        | 0.00%        | 0.01%        |
| 19(C)      | 0.02%        | 0.43%        | 0.00%        | 0.18%        |
| 20(H)      | 0.01%        | 0.02%        | 0.00%        | 0.02%        |
| 21(C)      | 0.07%        | 0.04%        | 0.02%        | 0.02%        |
| 22(H)      | 0.01%        | 0.02%        | 0.00%        | 0.01%        |
| 23(C)      | 0.03%        | 0.62%        | 0.01%        | 0.22%        |
| 24(H)      | 0.00%        | 0.00%        | 0.00%        | 0.00%        |
| 25(C)      | 0.05%        | 0.17%        | 0.02%        | 0.07%        |
| 26(H)      | 0.00%        | 0.01%        | 0.00%        | 0.01%        |
| 27(C)      | 0.08%        | 0.26%        | 0.02%        | 0.15%        |
| 81(C)      | 0.02%        | 0.14%        | 0.11%        | 0.12%        |
| 82(H)      | -0.01%       | 0.20%        | 0.00%        | 0.16%        |

|            |              |              |              |              |
|------------|--------------|--------------|--------------|--------------|
| 83(C)      | 0.00%        | 0.01%        | 0.01%        | 0.01%        |
| 84(H)      | 0.00%        | 0.00%        | 0.00%        | 0.00%        |
| 85(H)      | 0.00%        | 0.02%        | 0.01%        | 0.01%        |
| 86(H)      | 0.00%        | 0.01%        | 0.01%        | 0.01%        |
| <b>sum</b> | <b>3.44%</b> | <b>4.38%</b> | <b>4.16%</b> | <b>3.54%</b> |
| 11(N)      | 0.24%        | 0.76%        | 0.01%        | 0.66%        |
| 12(N)      | 0.55%        | 0.38%        | 0.31%        | 0.45%        |
| 13(N)      | 0.59%        | 0.31%        | 0.28%        | 0.40%        |
| 56(C)      | 1.16%        | 0.12%        | 0.60%        | 0.19%        |
| 57(H)      | 0.00%        | 0.00%        | 0.02%        | 0.00%        |
| 58(C)      | 1.11%        | 0.19%        | 0.49%        | 0.23%        |
| 59(H)      | 0.01%        | 0.00%        | 0.00%        | 0.00%        |
| 60(C)      | 0.99%        | 0.53%        | 1.20%        | 0.54%        |
| 47(C)      | 0.01%        | 0.45%        | 0.01%        | 0.19%        |
| 48(H)      | 0.01%        | 0.02%        | 0.00%        | 0.02%        |
| 49(C)      | 0.09%        | 0.05%        | 0.01%        | 0.03%        |
| 50(H)      | 0.00%        | 0.02%        | 0.00%        | 0.01%        |
| 51(C)      | 0.02%        | 0.66%        | 0.00%        | 0.24%        |
| 52(H)      | 0.00%        | 0.00%        | 0.00%        | 0.00%        |
| 53(C)      | 0.07%        | 0.17%        | 0.01%        | 0.09%        |
| 54(H)      | 0.00%        | 0.01%        | 0.00%        | 0.01%        |
| 55(C)      | 0.07%        | 0.28%        | 0.00%        | 0.16%        |
| 61(C)      | 0.03%        | 0.14%        | 0.12%        | 0.12%        |
| 62(H)      | -0.01%       | 0.20%        | 0.00%        | 0.16%        |
| 63(C)      | 0.04%        | 0.05%        | 0.01%        | 0.04%        |
| 64(H)      | 0.00%        | 0.02%        | 0.00%        | 0.02%        |
| 65(H)      | 0.00%        | 0.00%        | 0.01%        | 0.00%        |
| 66(H)      | 0.00%        | 0.00%        | 0.01%        | 0.00%        |
| 67(C)      | 0.02%        | 0.01%        | 0.04%        | 0.01%        |
| 68(H)      | 0.00%        | 0.01%        | 0.01%        | 0.01%        |
| 69(H)      | 0.00%        | 0.02%        | 0.00%        | 0.01%        |
| 70(H)      | 0.00%        | 0.00%        | 0.00%        | 0.00%        |
| <b>sum</b> | <b>5.03%</b> | <b>4.39%</b> | <b>3.14%</b> | <b>3.60%</b> |
| 94(N)      | 0.30%        | 0.74%        | 0.07%        | 0.67%        |
| 95(N)      | 0.45%        | 0.39%        | 0.32%        | 0.40%        |
| 96(N)      | 0.47%        | 0.32%        | 0.54%        | 0.35%        |
| 127(C)     | 0.86%        | 0.12%        | 1.01%        | 0.17%        |
| 128(H)     | 0.01%        | 0.00%        | 0.00%        | 0.00%        |
| 129(C)     | 0.85%        | 0.19%        | 0.83%        | 0.22%        |
| 130(H)     | 0.02%        | 0.00%        | 0.01%        | 0.01%        |
| 131(C)     | 2.21%        | 0.53%        | 0.75%        | 0.61%        |
| 118(C)     | 0.01%        | 0.42%        | 0.02%        | 0.26%        |
| 119(H)     | 0.01%        | 0.01%        | 0.00%        | 0.02%        |
| 120(C)     | 0.09%        | 0.04%        | 0.01%        | 0.03%        |
| 121(H)     | 0.00%        | 0.02%        | 0.00%        | 0.02%        |



|            |              |              |              |              |
|------------|--------------|--------------|--------------|--------------|
| 122(C)     | 0.02%        | 0.61%        | 0.01%        | 0.30%        |
| 123(H)     | 0.00%        | 0.00%        | 0.00%        | 0.00%        |
| 124(C)     | 0.06%        | 0.17%        | 0.01%        | 0.09%        |
| 125(H)     | 0.00%        | 0.01%        | 0.00%        | 0.01%        |
| 126(C)     | 0.07%        | 0.26%        | 0.01%        | 0.17%        |
| 156(C)     | 0.03%        | 0.14%        | 0.02%        | 0.21%        |
| 157(H)     | 0.00%        | 0.20%        | 0.00%        | 0.16%        |
| 158(C)     | 0.02%        | 0.05%        | 0.02%        | 0.05%        |
| 159(H)     | 0.00%        | 0.02%        | 0.00%        | 0.02%        |
| 160(H)     | 0.00%        | 0.00%        | 0.00%        | 0.00%        |
| 161(H)     | 0.00%        | 0.00%        | 0.00%        | 0.00%        |
| 162(C)     | 0.02%        | 0.01%        | 0.03%        | 0.01%        |
| 163(H)     | 0.00%        | 0.01%        | 0.00%        | 0.01%        |
| 164(H)     | 0.00%        | 0.02%        | 0.00%        | 0.01%        |
| 165(H)     | 0.00%        | 0.00%        | 0.00%        | 0.00%        |
| <b>sum</b> | <b>5.54%</b> | <b>4.28%</b> | <b>3.66%</b> | <b>3.79%</b> |
| 91(N)      | 0.36%        | 0.76%        | 0.03%        | 0.58%        |
| 92(N)      | 0.23%        | 0.40%        | 0.43%        | 0.35%        |
| 93(N)      | 0.25%        | 0.33%        | 0.37%        | 0.32%        |
| 113(C)     | 0.37%        | 0.13%        | 0.83%        | 0.16%        |
| 114(H)     | 0.00%        | 0.00%        | 0.01%        | 0.00%        |
| 115(C)     | 0.43%        | 0.20%        | 0.78%        | 0.20%        |
| 116(H)     | 0.02%        | 0.00%        | 0.00%        | 0.01%        |
| 117(C)     | 1.47%        | 0.55%        | 1.44%        | 0.86%        |
| 100(C)     | 0.01%        | 0.05%        | 0.05%        | 0.04%        |
| 101(H)     | 0.00%        | 0.00%        | 0.01%        | 0.00%        |
| 102(H)     | 0.00%        | 0.00%        | 0.00%        | 0.00%        |
| 103(H)     | 0.00%        | 0.02%        | 0.00%        | 0.01%        |
| 104(C)     | 0.02%        | 0.43%        | 0.00%        | 0.18%        |
| 105(H)     | 0.01%        | 0.02%        | 0.00%        | 0.02%        |
| 106(C)     | 0.07%        | 0.04%        | 0.02%        | 0.02%        |
| 107(H)     | 0.01%        | 0.02%        | 0.00%        | 0.01%        |
| 108(C)     | 0.03%        | 0.62%        | 0.01%        | 0.22%        |
| 109(H)     | 0.00%        | 0.00%        | 0.00%        | 0.00%        |
| 110(C)     | 0.05%        | 0.17%        | 0.02%        | 0.07%        |
| 111(H)     | 0.00%        | 0.01%        | 0.00%        | 0.01%        |
| 112(C)     | 0.08%        | 0.26%        | 0.02%        | 0.15%        |
| 166(C)     | 0.02%        | 0.14%        | 0.11%        | 0.12%        |
| 167(H)     | -0.01%       | 0.20%        | 0.00%        | 0.16%        |
| 168(C)     | 0.00%        | 0.01%        | 0.01%        | 0.01%        |
| 169(H)     | 0.00%        | 0.00%        | 0.00%        | 0.00%        |
| 170(H)     | 0.00%        | 0.02%        | 0.01%        | 0.01%        |
| 171(H)     | 0.00%        | 0.01%        | 0.01%        | 0.01%        |
| <b>sum</b> | <b>3.44%</b> | <b>4.38%</b> | <b>4.16%</b> | <b>3.54%</b> |
| 97(N)      | 0.24%        | 0.76%        | 0.01%        | 0.66%        |

|            |              |              |              |              |
|------------|--------------|--------------|--------------|--------------|
| 98(N)      | 0.55%        | 0.38%        | 0.31%        | 0.45%        |
| 99(N)      | 0.59%        | 0.31%        | 0.28%        | 0.40%        |
| 141(C)     | 1.16%        | 0.12%        | 0.60%        | 0.19%        |
| 142(H)     | 0.00%        | 0.00%        | 0.02%        | 0.00%        |
| 143(C)     | 1.11%        | 0.19%        | 0.49%        | 0.23%        |
| 144(H)     | 0.01%        | 0.00%        | 0.00%        | 0.00%        |
| 145(C)     | 0.99%        | 0.53%        | 1.20%        | 0.54%        |
| 132(C)     | 0.01%        | 0.45%        | 0.01%        | 0.19%        |
| 133(H)     | 0.01%        | 0.02%        | 0.00%        | 0.02%        |
| 134(C)     | 0.09%        | 0.05%        | 0.01%        | 0.03%        |
| 135(H)     | 0.00%        | 0.02%        | 0.00%        | 0.01%        |
| 136(C)     | 0.02%        | 0.66%        | 0.00%        | 0.24%        |
| 137(H)     | 0.00%        | 0.00%        | 0.00%        | 0.00%        |
| 138(C)     | 0.07%        | 0.17%        | 0.01%        | 0.09%        |
| 139(H)     | 0.00%        | 0.01%        | 0.00%        | 0.01%        |
| 140(C)     | 0.07%        | 0.28%        | 0.00%        | 0.16%        |
| 146(C)     | 0.03%        | 0.14%        | 0.12%        | 0.12%        |
| 147(H)     | -0.01%       | 0.20%        | 0.00%        | 0.16%        |
| 148(C)     | 0.04%        | 0.05%        | 0.01%        | 0.04%        |
| 149(H)     | 0.00%        | 0.02%        | 0.00%        | 0.02%        |
| 150(H)     | 0.00%        | 0.00%        | 0.01%        | 0.00%        |
| 151(H)     | 0.00%        | 0.00%        | 0.01%        | 0.00%        |
| 152(C)     | 0.02%        | 0.01%        | 0.04%        | 0.01%        |
| 153(H)     | 0.00%        | 0.01%        | 0.01%        | 0.01%        |
| 154(H)     | 0.00%        | 0.02%        | 0.00%        | 0.01%        |
| 155(H)     | 0.00%        | 0.00%        | 0.00%        | 0.00%        |
| <b>sum</b> | <b>5.03%</b> | <b>4.39%</b> | <b>3.14%</b> | <b>3.60%</b> |

Supplementary Table 26. Orbital composition analysis of **4** with Mulliken partition

| Number and type of atom | Singlet       |               | Triplet       |               |
|-------------------------|---------------|---------------|---------------|---------------|
|                         | HOMO          | LUMO          | SOMO-1        | SOMO          |
| <b>5 (C)</b>            | <b>24.31%</b> | <b>0.20%</b>  | <b>23.85%</b> | <b>0.03%</b>  |
| <b>Au6</b>              |               |               |               |               |
| 1                       | 4.61%         | 7.39%         | 4.19%         | 8.13%         |
| 2                       | 4.58%         | 7.46%         | 4.26%         | 8.16%         |
| 3                       | 4.65%         | 7.39%         | 4.24%         | 8.07%         |
| 105                     | 4.61%         | 7.39%         | 4.19%         | 8.13%         |
| 106                     | 4.58%         | 7.46%         | 4.26%         | 8.16%         |
| 107                     | 4.65%         | 7.39%         | 4.24%         | 8.07%         |
| <b>sum</b>              | <b>27.67%</b> | <b>44.48%</b> | <b>25.37%</b> | <b>48.73%</b> |
| <b>Ag2</b>              |               |               |               |               |

|                |              |               |              |               |
|----------------|--------------|---------------|--------------|---------------|
| 4              | 1.12%        | 14.76%        | 0.91%        | 14.80%        |
| 108            | 1.12%        | 14.76%        | 0.91%        | 14.80%        |
| <b>sum</b>     | <b>2.23%</b> | <b>29.52%</b> | <b>1.82%</b> | <b>29.60%</b> |
| <b>Ligands</b> |              |               |              |               |
| 6(P)           | 2.14%        | 1.60%         | 1.80%        | 1.34%         |
| 9(N)           | 0.26%        | 0.73%         | 0.19%        | 0.66%         |
| 12(C)          | 0.12%        | 0.19%         | 0.13%        | 0.17%         |
| 13(C)          | 0.20%        | 0.02%         | 0.20%        | 0.02%         |
| 14(H)          | 0.01%        | 0.02%         | 0.01%        | 0.02%         |
| 15(C)          | 0.03%        | 0.16%         | 0.02%        | 0.08%         |
| 16(H)          | 0.01%        | 0.00%         | 0.01%        | 0.00%         |
| 17(C)          | 0.12%        | 0.06%         | 0.13%        | 0.04%         |
| 18(H)          | 0.00%        | 0.02%         | 0.00%        | 0.02%         |
| 19(C)          | 0.11%        | 0.15%         | 0.11%        | 0.11%         |
| 20(H)          | 0.01%        | 0.03%         | 0.00%        | 0.03%         |
| 21(C)          | 1.43%        | 0.25%         | 1.66%        | 0.21%         |
| 22(C)          | 0.42%        | 0.18%         | 0.41%        | 0.13%         |
| 23(H)          | 0.01%        | 0.00%         | 0.01%        | 0.00%         |
| 24(C)          | 0.41%        | 0.02%         | 0.54%        | 0.03%         |
| 25(H)          | 0.02%        | 0.00%         | 0.02%        | 0.00%         |
| 26(C)          | 1.16%        | 0.17%         | 1.40%        | 0.13%         |
| 27(H)          | 0.00%        | 0.00%         | 0.00%        | 0.00%         |
| 28(C)          | 0.14%        | 0.03%         | 0.15%        | 0.02%         |
| 29(H)          | 0.00%        | 0.00%         | 0.00%        | 0.00%         |
| 30(C)          | 0.58%        | 0.10%         | 0.72%        | 0.08%         |
| 31(H)          | 0.00%        | 0.11%         | 0.00%        | 0.08%         |
| 32(C)          | 0.13%        | 0.01%         | 0.14%        | 0.02%         |
| 33(C)          | 0.11%        | 0.09%         | 0.11%        | 0.09%         |
| 34(H)          | 0.00%        | 0.00%         | 0.00%        | 0.00%         |
| 35(C)          | 0.02%        | 0.01%         | 0.03%        | 0.01%         |
| 36(H)          | 0.01%        | 0.00%         | 0.01%        | 0.00%         |
| 37(C)          | 0.10%        | 0.10%         | 0.12%        | 0.10%         |
| 38(H)          | 0.00%        | 0.00%         | 0.00%        | 0.00%         |
| 39(C)          | 0.03%        | 0.04%         | 0.04%        | 0.03%         |
| 40(H)          | 0.00%        | 0.00%         | 0.00%        | 0.00%         |
| 41(C)          | 0.06%        | 0.07%         | 0.06%        | 0.10%         |
| 42(H)          | 0.00%        | 0.10%         | 0.00%        | 0.10%         |
| <b>sum</b>     | <b>7.63%</b> | <b>4.27%</b>  | <b>8.00%</b> | <b>3.63%</b>  |
| 7(P)           | 2.10%        | 1.65%         | 1.86%        | 1.33%         |
| 10(N)          | 0.27%        | 0.74%         | 0.20%        | 0.66%         |
| 43(C)          | 0.12%        | 0.19%         | 0.13%        | 0.16%         |
| 44(C)          | 0.20%        | 0.02%         | 0.20%        | 0.02%         |
| 45(H)          | 0.01%        | 0.02%         | 0.01%        | 0.02%         |
| 46(C)          | 0.03%        | 0.16%         | 0.02%        | 0.08%         |
| 47(H)          | 0.01%        | 0.00%         | 0.01%        | 0.00%         |

|            |              |              |              |              |
|------------|--------------|--------------|--------------|--------------|
| 48(C)      | 0.12%        | 0.06%        | 0.13%        | 0.04%        |
| 49(H)      | 0.00%        | 0.02%        | 0.00%        | 0.02%        |
| 50(C)      | 0.11%        | 0.15%        | 0.11%        | 0.11%        |
| 51(H)      | 0.01%        | 0.03%        | 0.00%        | 0.03%        |
| 52(C)      | 1.43%        | 0.25%        | 1.65%        | 0.21%        |
| 53(C)      | 0.41%        | 0.18%        | 0.42%        | 0.13%        |
| 54(H)      | 0.01%        | 0.00%        | 0.01%        | 0.00%        |
| 55(C)      | 0.42%        | 0.02%        | 0.53%        | 0.03%        |
| 56(H)      | 0.02%        | 0.00%        | 0.02%        | 0.00%        |
| 57(C)      | 1.17%        | 0.18%        | 1.38%        | 0.13%        |
| 58(H)      | 0.00%        | 0.00%        | 0.00%        | 0.00%        |
| 59(C)      | 0.13%        | 0.03%        | 0.15%        | 0.02%        |
| 60(H)      | 0.00%        | 0.00%        | 0.00%        | 0.00%        |
| 61(C)      | 0.60%        | 0.10%        | 0.70%        | 0.08%        |
| 62(H)      | 0.00%        | 0.10%        | 0.00%        | 0.09%        |
| 63(C)      | 0.11%        | 0.01%        | 0.15%        | 0.02%        |
| 64(C)      | 0.10%        | 0.10%        | 0.12%        | 0.10%        |
| 65(H)      | 0.00%        | 0.00%        | 0.00%        | 0.00%        |
| 66(C)      | 0.02%        | 0.02%        | 0.03%        | 0.01%        |
| 67(H)      | 0.01%        | 0.00%        | 0.01%        | 0.00%        |
| 68(C)      | 0.08%        | 0.11%        | 0.14%        | 0.10%        |
| 69(H)      | 0.00%        | 0.00%        | 0.00%        | 0.00%        |
| 70(C)      | 0.03%        | 0.05%        | 0.04%        | 0.03%        |
| 71(H)      | 0.00%        | 0.00%        | 0.00%        | 0.00%        |
| 72(C)      | 0.05%        | 0.07%        | 0.06%        | 0.10%        |
| 73(H)      | 0.00%        | 0.10%        | 0.00%        | 0.09%        |
| <b>sum</b> | <b>7.57%</b> | <b>4.37%</b> | <b>8.08%</b> | <b>3.61%</b> |
| 8(P)       | 2.15%        | 1.59%        | 1.87%        | 1.32%        |
| 11(N)      | 0.28%        | 0.74%        | 0.20%        | 0.65%        |
| 74(C)      | 0.12%        | 0.19%        | 0.14%        | 0.16%        |
| 75(C)      | 0.21%        | 0.02%        | 0.21%        | 0.02%        |
| 76(H)      | 0.00%        | 0.02%        | 0.01%        | 0.02%        |
| 77(C)      | 0.03%        | 0.16%        | 0.02%        | 0.08%        |
| 78(H)      | 0.01%        | 0.00%        | 0.01%        | 0.00%        |
| 79(C)      | 0.12%        | 0.06%        | 0.14%        | 0.04%        |
| 80(H)      | 0.00%        | 0.02%        | 0.00%        | 0.02%        |
| 81(C)      | 0.12%        | 0.14%        | 0.12%        | 0.10%        |
| 82(H)      | 0.01%        | 0.03%        | 0.00%        | 0.03%        |
| 83(C)      | 1.43%        | 0.25%        | 1.73%        | 0.20%        |
| 84(C)      | 0.41%        | 0.17%        | 0.44%        | 0.13%        |
| 85(H)      | 0.01%        | 0.00%        | 0.01%        | 0.00%        |
| 86(C)      | 0.41%        | 0.02%        | 0.57%        | 0.02%        |
| 87(H)      | 0.02%        | 0.00%        | 0.02%        | 0.00%        |
| 88(C)      | 1.14%        | 0.16%        | 1.51%        | 0.14%        |
| 89(H)      | 0.00%        | 0.00%        | 0.00%        | 0.00%        |

|            |              |              |              |              |
|------------|--------------|--------------|--------------|--------------|
| 90(C)      | 0.14%        | 0.03%        | 0.16%        | 0.02%        |
| 91(H)      | 0.00%        | 0.00%        | 0.00%        | 0.00%        |
| 92(C)      | 0.58%        | 0.09%        | 0.77%        | 0.08%        |
| 93(H)      | 0.00%        | 0.11%        | 0.00%        | 0.07%        |
| 94(C)      | 0.14%        | 0.01%        | 0.13%        | 0.02%        |
| 95(C)      | 0.11%        | 0.10%        | 0.11%        | 0.10%        |
| 96(H)      | 0.00%        | 0.00%        | 0.00%        | 0.00%        |
| 97(C)      | 0.03%        | 0.01%        | 0.02%        | 0.02%        |
| 98(H)      | 0.01%        | 0.00%        | 0.01%        | 0.00%        |
| 99(C)      | 0.11%        | 0.10%        | 0.11%        | 0.10%        |
| 100(H)     | 0.00%        | 0.00%        | 0.00%        | 0.00%        |
| 101(C)     | 0.03%        | 0.04%        | 0.03%        | 0.03%        |
| 102(H)     | 0.00%        | 0.00%        | 0.00%        | 0.00%        |
| 103(C)     | 0.06%        | 0.07%        | 0.05%        | 0.09%        |
| 104(H)     | 0.00%        | 0.09%        | 0.00%        | 0.10%        |
| <b>sum</b> | <b>7.69%</b> | <b>4.27%</b> | <b>8.40%</b> | <b>3.58%</b> |
| 109(P)     | 2.14%        | 1.60%        | 1.80%        | 1.34%        |
| 112(N)     | 0.26%        | 0.73%        | 0.19%        | 0.66%        |
| 115(C)     | 0.12%        | 0.19%        | 0.13%        | 0.17%        |
| 116(C)     | 0.20%        | 0.02%        | 0.20%        | 0.02%        |
| 117(H)     | 0.01%        | 0.02%        | 0.01%        | 0.02%        |
| 118(C)     | 0.03%        | 0.16%        | 0.02%        | 0.08%        |
| 119(H)     | 0.01%        | 0.00%        | 0.01%        | 0.00%        |
| 120(C)     | 0.12%        | 0.06%        | 0.13%        | 0.04%        |
| 121(H)     | 0.00%        | 0.02%        | 0.00%        | 0.02%        |
| 122(C)     | 0.11%        | 0.15%        | 0.11%        | 0.11%        |
| 123(H)     | 0.01%        | 0.03%        | 0.00%        | 0.03%        |
| 124(C)     | 1.43%        | 0.25%        | 1.66%        | 0.21%        |
| 125(C)     | 0.42%        | 0.18%        | 0.41%        | 0.13%        |
| 126(H)     | 0.01%        | 0.00%        | 0.01%        | 0.00%        |
| 127(C)     | 0.41%        | 0.02%        | 0.54%        | 0.03%        |
| 128(H)     | 0.02%        | 0.00%        | 0.02%        | 0.00%        |
| 129(C)     | 1.16%        | 0.17%        | 1.40%        | 0.13%        |
| 130(H)     | 0.00%        | 0.00%        | 0.00%        | 0.00%        |
| 131(C)     | 0.14%        | 0.03%        | 0.15%        | 0.02%        |
| 132(H)     | 0.00%        | 0.00%        | 0.00%        | 0.00%        |
| 133(C)     | 0.58%        | 0.10%        | 0.72%        | 0.08%        |
| 134(H)     | 0.00%        | 0.11%        | 0.00%        | 0.08%        |
| 135(C)     | 0.13%        | 0.01%        | 0.14%        | 0.02%        |
| 136(C)     | 0.11%        | 0.09%        | 0.11%        | 0.09%        |
| 137(H)     | 0.00%        | 0.00%        | 0.00%        | 0.00%        |
| 138(C)     | 0.02%        | 0.01%        | 0.03%        | 0.01%        |
| 139(H)     | 0.01%        | 0.00%        | 0.01%        | 0.00%        |
| 140(C)     | 0.10%        | 0.10%        | 0.12%        | 0.10%        |
| 141(H)     | 0.00%        | 0.00%        | 0.00%        | 0.00%        |

|            |              |              |              |              |
|------------|--------------|--------------|--------------|--------------|
| 142(C)     | 0.03%        | 0.04%        | 0.04%        | 0.03%        |
| 143(H)     | 0.00%        | 0.00%        | 0.00%        | 0.00%        |
| 144(C)     | 0.06%        | 0.07%        | 0.06%        | 0.10%        |
| 145(H)     | 0.00%        | 0.10%        | 0.00%        | 0.10%        |
| <b>sum</b> | <b>7.63%</b> | <b>4.27%</b> | <b>8.00%</b> | <b>3.63%</b> |
| 110(P)     | 2.10%        | 1.65%        | 1.86%        | 1.33%        |
| 113(N)     | 0.27%        | 0.74%        | 0.20%        | 0.66%        |
| 146(C)     | 0.12%        | 0.19%        | 0.13%        | 0.16%        |
| 147(C)     | 0.20%        | 0.02%        | 0.20%        | 0.02%        |
| 148(H)     | 0.01%        | 0.02%        | 0.01%        | 0.02%        |
| 149(C)     | 0.03%        | 0.16%        | 0.02%        | 0.08%        |
| 150(H)     | 0.01%        | 0.00%        | 0.01%        | 0.00%        |
| 151(C)     | 0.12%        | 0.06%        | 0.13%        | 0.04%        |
| 152(H)     | 0.00%        | 0.02%        | 0.00%        | 0.02%        |
| 153(C)     | 0.11%        | 0.15%        | 0.11%        | 0.11%        |
| 154(H)     | 0.01%        | 0.03%        | 0.00%        | 0.03%        |
| 155(C)     | 1.43%        | 0.25%        | 1.65%        | 0.21%        |
| 156(C)     | 0.41%        | 0.18%        | 0.42%        | 0.13%        |
| 157(H)     | 0.01%        | 0.00%        | 0.01%        | 0.00%        |
| 158(C)     | 0.42%        | 0.02%        | 0.53%        | 0.03%        |
| 159(H)     | 0.02%        | 0.00%        | 0.02%        | 0.00%        |
| 160(C)     | 1.17%        | 0.18%        | 1.38%        | 0.13%        |
| 161(H)     | 0.00%        | 0.00%        | 0.00%        | 0.00%        |
| 162(C)     | 0.13%        | 0.03%        | 0.15%        | 0.02%        |
| 163(H)     | 0.00%        | 0.00%        | 0.00%        | 0.00%        |
| 164(C)     | 0.60%        | 0.10%        | 0.70%        | 0.08%        |
| 165(H)     | 0.00%        | 0.10%        | 0.00%        | 0.09%        |
| 166(C)     | 0.11%        | 0.01%        | 0.15%        | 0.02%        |
| 167(C)     | 0.10%        | 0.10%        | 0.12%        | 0.10%        |
| 168(H)     | 0.00%        | 0.00%        | 0.00%        | 0.00%        |
| 169(C)     | 0.02%        | 0.02%        | 0.03%        | 0.01%        |
| 170(H)     | 0.01%        | 0.00%        | 0.01%        | 0.00%        |
| 171(C)     | 0.08%        | 0.11%        | 0.14%        | 0.10%        |
| 172(H)     | 0.00%        | 0.00%        | 0.00%        | 0.00%        |
| 173(C)     | 0.03%        | 0.05%        | 0.04%        | 0.03%        |
| 174(H)     | 0.00%        | 0.00%        | 0.00%        | 0.00%        |
| 175(C)     | 0.05%        | 0.07%        | 0.06%        | 0.10%        |
| 176(H)     | 0.00%        | 0.10%        | 0.00%        | 0.09%        |
| <b>sum</b> | <b>7.57%</b> | <b>4.37%</b> | <b>8.08%</b> | <b>3.61%</b> |
| 111(P)     | 2.15%        | 1.59%        | 1.87%        | 1.32%        |
| 114(N)     | 0.28%        | 0.74%        | 0.20%        | 0.65%        |
| 177(C)     | 0.12%        | 0.19%        | 0.14%        | 0.16%        |
| 178(C)     | 0.21%        | 0.02%        | 0.21%        | 0.02%        |
| 179(H)     | 0.00%        | 0.02%        | 0.01%        | 0.02%        |
| 180(C)     | 0.03%        | 0.16%        | 0.02%        | 0.08%        |

|            |              |              |              |              |
|------------|--------------|--------------|--------------|--------------|
| 181(H)     | 0.01%        | 0.00%        | 0.01%        | 0.00%        |
| 182(C)     | 0.12%        | 0.06%        | 0.14%        | 0.04%        |
| 183(H)     | 0.00%        | 0.02%        | 0.00%        | 0.02%        |
| 184(C)     | 0.12%        | 0.14%        | 0.12%        | 0.10%        |
| 185(H)     | 0.01%        | 0.03%        | 0.00%        | 0.03%        |
| 186(C)     | 1.43%        | 0.25%        | 1.73%        | 0.20%        |
| 187(C)     | 0.41%        | 0.17%        | 0.44%        | 0.13%        |
| 188(H)     | 0.01%        | 0.00%        | 0.01%        | 0.00%        |
| 189(C)     | 0.41%        | 0.02%        | 0.57%        | 0.02%        |
| 190(H)     | 0.02%        | 0.00%        | 0.02%        | 0.00%        |
| 191(C)     | 1.14%        | 0.16%        | 1.51%        | 0.14%        |
| 192(H)     | 0.00%        | 0.00%        | 0.00%        | 0.00%        |
| 193(C)     | 0.14%        | 0.03%        | 0.16%        | 0.02%        |
| 194(H)     | 0.00%        | 0.00%        | 0.00%        | 0.00%        |
| 195(C)     | 0.58%        | 0.09%        | 0.77%        | 0.08%        |
| 196(H)     | 0.00%        | 0.11%        | 0.00%        | 0.07%        |
| 197(C)     | 0.14%        | 0.01%        | 0.13%        | 0.02%        |
| 198(C)     | 0.11%        | 0.10%        | 0.11%        | 0.10%        |
| 199(H)     | 0.00%        | 0.00%        | 0.00%        | 0.00%        |
| 200(C)     | 0.03%        | 0.01%        | 0.02%        | 0.02%        |
| 201(H)     | 0.01%        | 0.00%        | 0.01%        | 0.00%        |
| 202(C)     | 0.11%        | 0.10%        | 0.11%        | 0.10%        |
| 203(H)     | 0.00%        | 0.00%        | 0.00%        | 0.00%        |
| 204(C)     | 0.03%        | 0.04%        | 0.03%        | 0.03%        |
| 205(H)     | 0.00%        | 0.00%        | 0.00%        | 0.00%        |
| 206(C)     | 0.06%        | 0.07%        | 0.05%        | 0.09%        |
| 207(H)     | 0.00%        | 0.09%        | 0.00%        | 0.10%        |
| <b>sum</b> | <b>7.69%</b> | <b>4.27%</b> | <b>8.40%</b> | <b>3.58%</b> |

Supplementary Table 27. Calculated radiative rate constants of the low-lying spin-orbit states of **3b**, **3d** and **4** at the triplet-state geometry by ZORA (DZ) and their main components

|           | expt.  |                          |                                    | theory |            |          |                          |                                    |                                      |
|-----------|--------|--------------------------|------------------------------------|--------|------------|----------|--------------------------|------------------------------------|--------------------------------------|
|           | $\Phi$ | $\tau$ ( $\mu\text{s}$ ) | $k_r$<br>( $10^5 \text{ s}^{-1}$ ) | St.    | $\Delta E$ | $f$      | $\tau$ ( $\mu\text{s}$ ) | $k_r$<br>( $10^5 \text{ s}^{-1}$ ) | Main component                       |
| <b>3a</b> | 0.88   | 1.85                     | 4.8                                |        |            |          | -                        |                                    |                                      |
|           |        |                          |                                    | 1      | 2.111      | 0.000050 | 102.80                   | 0.097                              | T <sub>1</sub> (S <sub>z</sub> = 0)  |
|           |        |                          |                                    | 2      | 2.111      | 0.000050 | 103.30                   | 0.097                              | T <sub>1</sub> (S <sub>z</sub> = ±1) |
| <b>3b</b> | 0.86   | 1.66                     | 5.2                                | 3      | 2.114      | 0.000146 | 35.25                    | 0.284                              | T <sub>1</sub> (S <sub>z</sub> = ±1) |
|           |        |                          |                                    | 4      | 2.200      | 0.016000 | 0.30                     | 33.591                             | S <sub>1</sub>                       |
|           |        |                          |                                    | 5      | 2.823      | 0.000324 | 8.93                     | 1.119                              | T <sub>2</sub> (S <sub>z</sub> = ±1) |
| <b>3c</b> | 0.14   | 0.32                     | 4.3                                |        |            |          | -                        |                                    |                                      |
|           |        |                          |                                    | 1      | 2.105      | 0.000022 | 231.60                   | 0.043                              | T <sub>1</sub> (S <sub>z</sub> = ±1) |
|           |        |                          |                                    | 2      | 2.105      | 0.000051 | 102.60                   | 0.097                              | T <sub>1</sub> (S <sub>z</sub> = ±1) |
| <b>3d</b> | 0.01   | 0.16                     | 0.6                                | 3      | 2.108      | 0.000126 | 41.14                    | 0.243                              | T <sub>1</sub> (S <sub>z</sub> = 0)  |
|           |        |                          |                                    | 4      | 2.195      | 0.012020 | 0.40                     | 25.138                             | S <sub>1</sub>                       |
|           |        |                          |                                    | 5      | 2.805      | 0.000220 | 13.32                    | 0.751                              | T <sub>2</sub> (S <sub>z</sub> = 0)  |
|           |        |                          |                                    | 1      | 2.709      | 0.000003 | 917.00                   | 0.011                              | T <sub>1</sub> (S <sub>z</sub> = ±1) |
|           |        |                          |                                    | 2      | 2.715      | 0.000375 | 8.34                     | 1.199                              | T <sub>1</sub> (S <sub>z</sub> = 0)  |
| <b>4</b>  | 0.31   | 3.74                     | 0.8                                | 3      | 2.718      | 0.000576 | 5.42                     | 1.847                              | T <sub>1</sub> (S <sub>z</sub> = ±1) |
|           |        |                          |                                    | 4      | 2.889      | 0.091950 | 0.03                     | 333.111                            | S <sub>1</sub>                       |
|           |        |                          |                                    | 5      | 3.129      | 0.005119 | 0.46                     | 21.739                             | T <sub>3</sub> (S <sub>z</sub> = 0)  |

Supplementary Table 28. Singlet and triplet components and spin-orbit coupling (SO) of the low-lying spin-orbit states of **3b**, **3d** and **4**

| Complex   | Triplet        | E <sub>T</sub> (eV) | SO(T <sub>x</sub> /S <sub>1</sub> ) cm <sup>-1</sup> | SO(T <sub>x</sub> /S <sub>3</sub> ) cm <sup>-1</sup> | Singlet        | E <sub>S</sub> (eV) | $f$      |
|-----------|----------------|---------------------|------------------------------------------------------|------------------------------------------------------|----------------|---------------------|----------|
| <b>3b</b> | T <sub>1</sub> | 2.114               | 44                                                   | 397                                                  | S <sub>1</sub> | 2.203               | 0.012230 |
|           | T <sub>2</sub> | 2.828               | 209                                                  | 74                                                   | S <sub>2</sub> | 2.971               | 0.019800 |
|           |                |                     |                                                      |                                                      | S <sub>3</sub> | 3.152               | 0.028980 |
| <b>3d</b> | T <sub>1</sub> | 2.114               | 44.18                                                | 397.14                                               | S <sub>1</sub> | 2.568               | 0.0083   |
|           | T <sub>2</sub> | 2.828               | 208.99                                               | 73.96                                                | S <sub>2</sub> | 2.570               | 0.0093   |
|           |                |                     |                                                      |                                                      | S <sub>3</sub> | 2.682               | 0.1126   |
| <b>4</b>  | T <sub>1</sub> | 2.743               | 9.51                                                 | 330.59                                               | S <sub>1</sub> | 2.623               | 0.0031   |
|           | T <sub>2</sub> | 3.191               | 377.97                                               | 706.79                                               | S <sub>2</sub> | 2.628               | 0.0040   |
|           | T <sub>3</sub> | 3.199               | 383.64                                               | 127.04                                               | S <sub>3</sub> | 2.654               | 0.0902   |



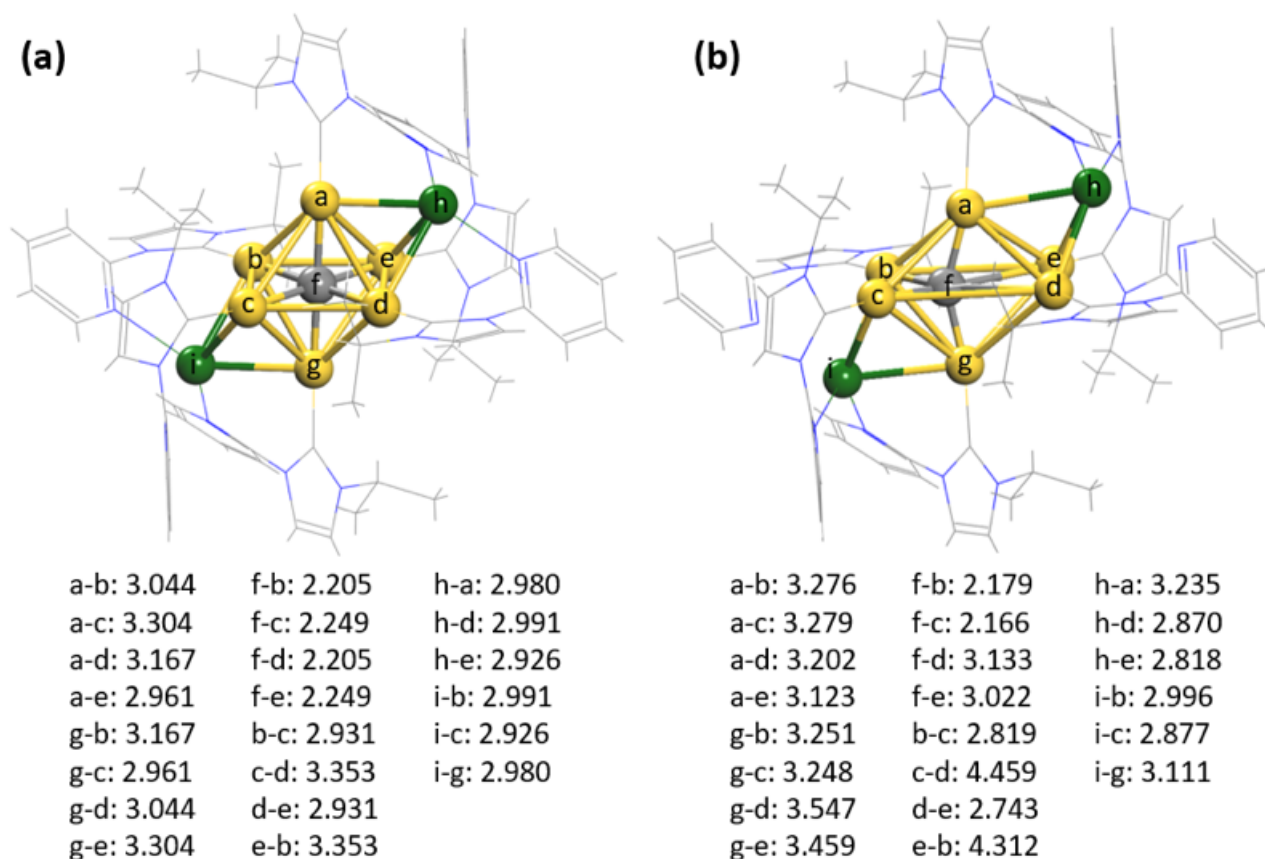

Supplementary Fig. 72. The optimized structures and the corresponding bond length of **3d** at the (a)  $T_1$  state and (b) MECP

Supplementary Table 29. MECP ( $T_1/S_0$ ) energies of **3b**, **3d** and **4** calculated by B3LYP/LanL2DZ, D95

|                                    | <b>3b</b>    |           | <b>3d</b>    |           | <b>4</b>     |
|------------------------------------|--------------|-----------|--------------|-----------|--------------|
| E(T0) (au)                         | -5610.235285 |           | -4688.501864 |           | -5445.835539 |
| E(MECP) (au)                       | -5610.216722 |           | -4688.484588 |           | -5445.822567 |
| $\Delta E$ (kcal/mol)              | 11.6         |           | 10.8         |           | 8.1          |
|                                    | <b>3a</b>    | <b>3b</b> | <b>3c</b>    | <b>3d</b> | <b>4</b>     |
| $k_{nr}$ ( $10^5 \text{ s}^{-1}$ ) | 0.6          | 0.8       | 26.5         | 61.9      | 1.9          |

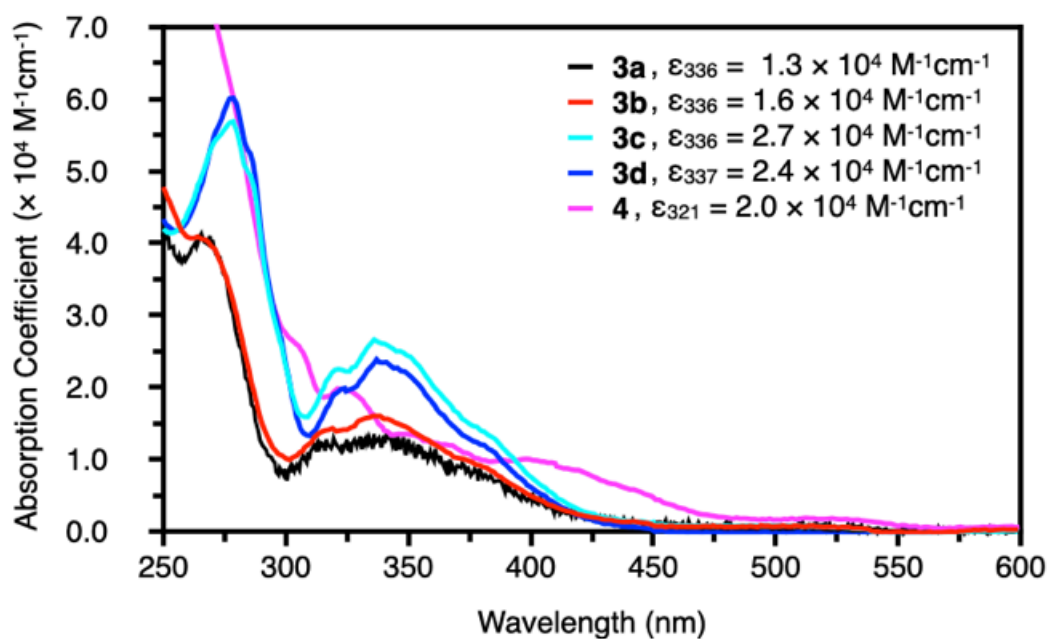

Supplementary Figure 73. UV-vis absorption spectra of **3a-d** and **4** (DMSO/PBS = 1:1000, v:v, 293 K)

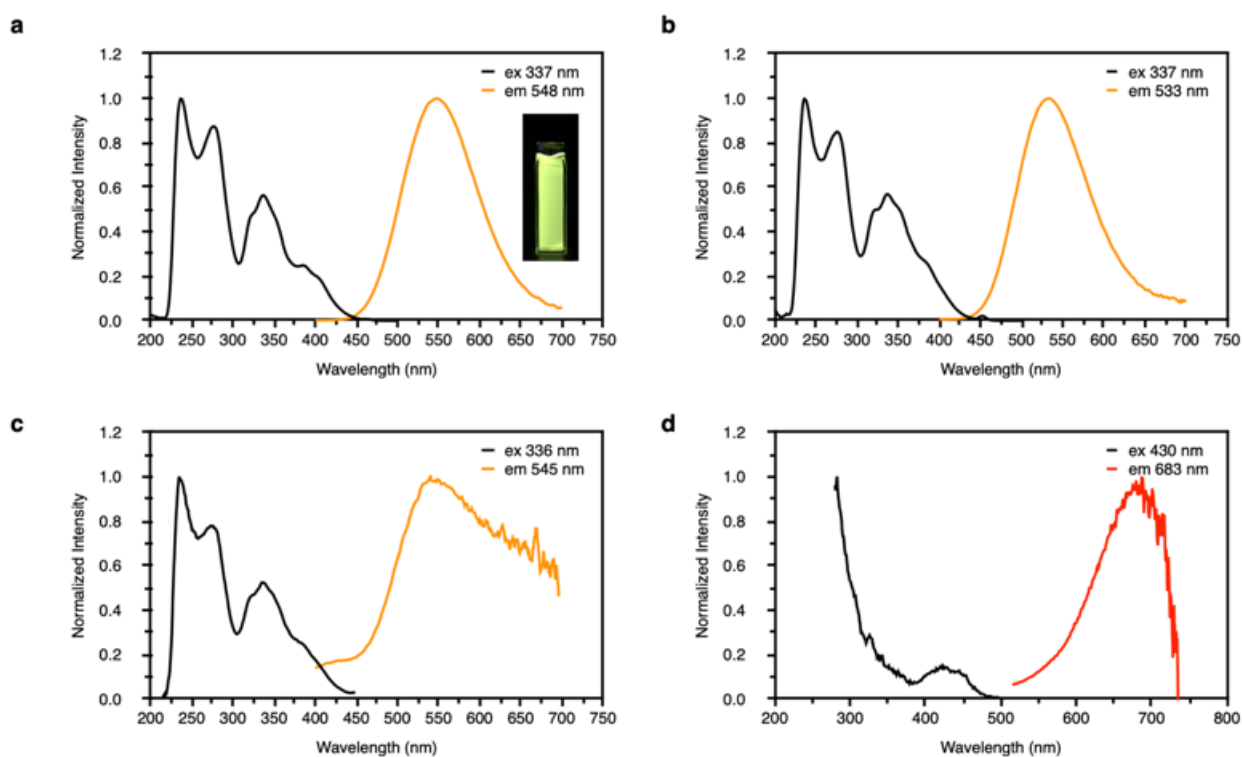

Supplementary Figure 74. Excitation and emission spectra of **3a** (a), **3b** (b), **3c** (c) and **4** (d) (DMSO/PBS = 1:1000, v:v, 293K)

Supplementary Table 30. Luminescence quantum yield and lifetime data of **3a-c** and **4** in CH<sub>2</sub>Cl<sub>2</sub>, and DMSO/PBS (1:1000, v:v), and **3d** in CH<sub>2</sub>Cl<sub>2</sub>/CH<sub>3</sub>OH (9:1, v:v)

|           | In CH <sub>2</sub> Cl <sub>2</sub> for <b>3a-c</b> , <b>4</b> , and CH <sub>2</sub> Cl <sub>2</sub> /CH <sub>3</sub> OH (9:1, v:v) for <b>3d</b> |               | In DMSO/PBS (1:1000, v:v) |               |
|-----------|--------------------------------------------------------------------------------------------------------------------------------------------------|---------------|---------------------------|---------------|
|           | Quantum yield                                                                                                                                    | Lifetime (ns) | Quantum yield             | Lifetime (ns) |
| <b>3a</b> | 0.88                                                                                                                                             | 1851          | 0.18                      | 219           |
| <b>3b</b> | 0.86                                                                                                                                             | 1659          | 0.16                      | 159           |
| <b>3c</b> | 0.14                                                                                                                                             | 325           | 0.01                      | 4             |
| <b>3d</b> | 0.01                                                                                                                                             | 160           | -                         | -             |
| <b>4</b>  | 0.31                                                                                                                                             | 3736          | 0.03                      | 190           |

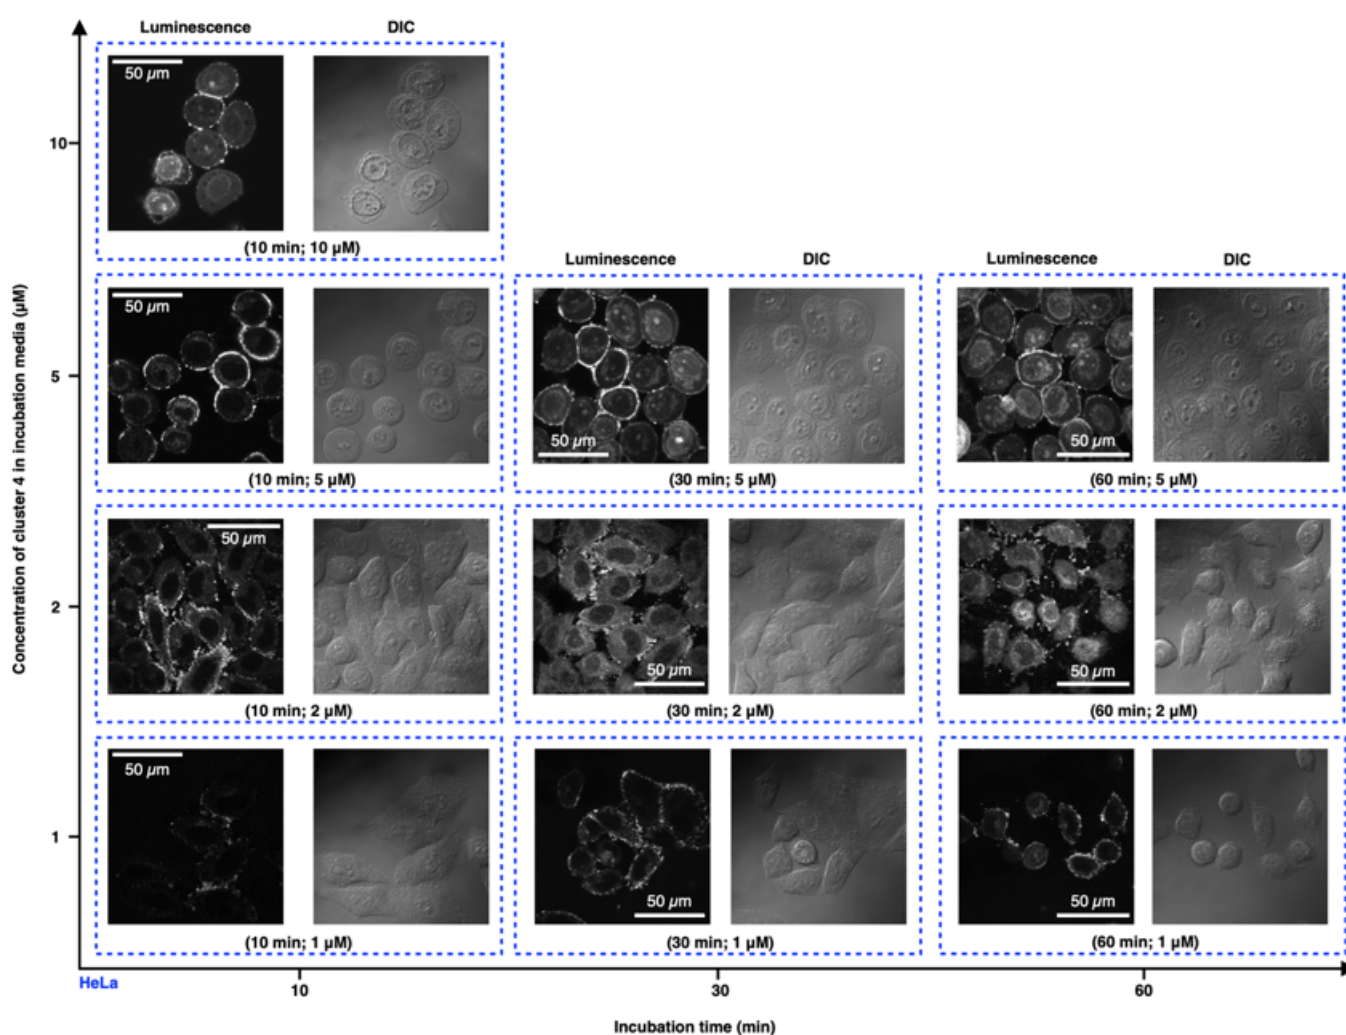

Supplementary Figure 75. Confocal luminescence images of **4** in HeLa. Each experiment was repeated independently for at least three times with similar results. Scale bar, 50 µm

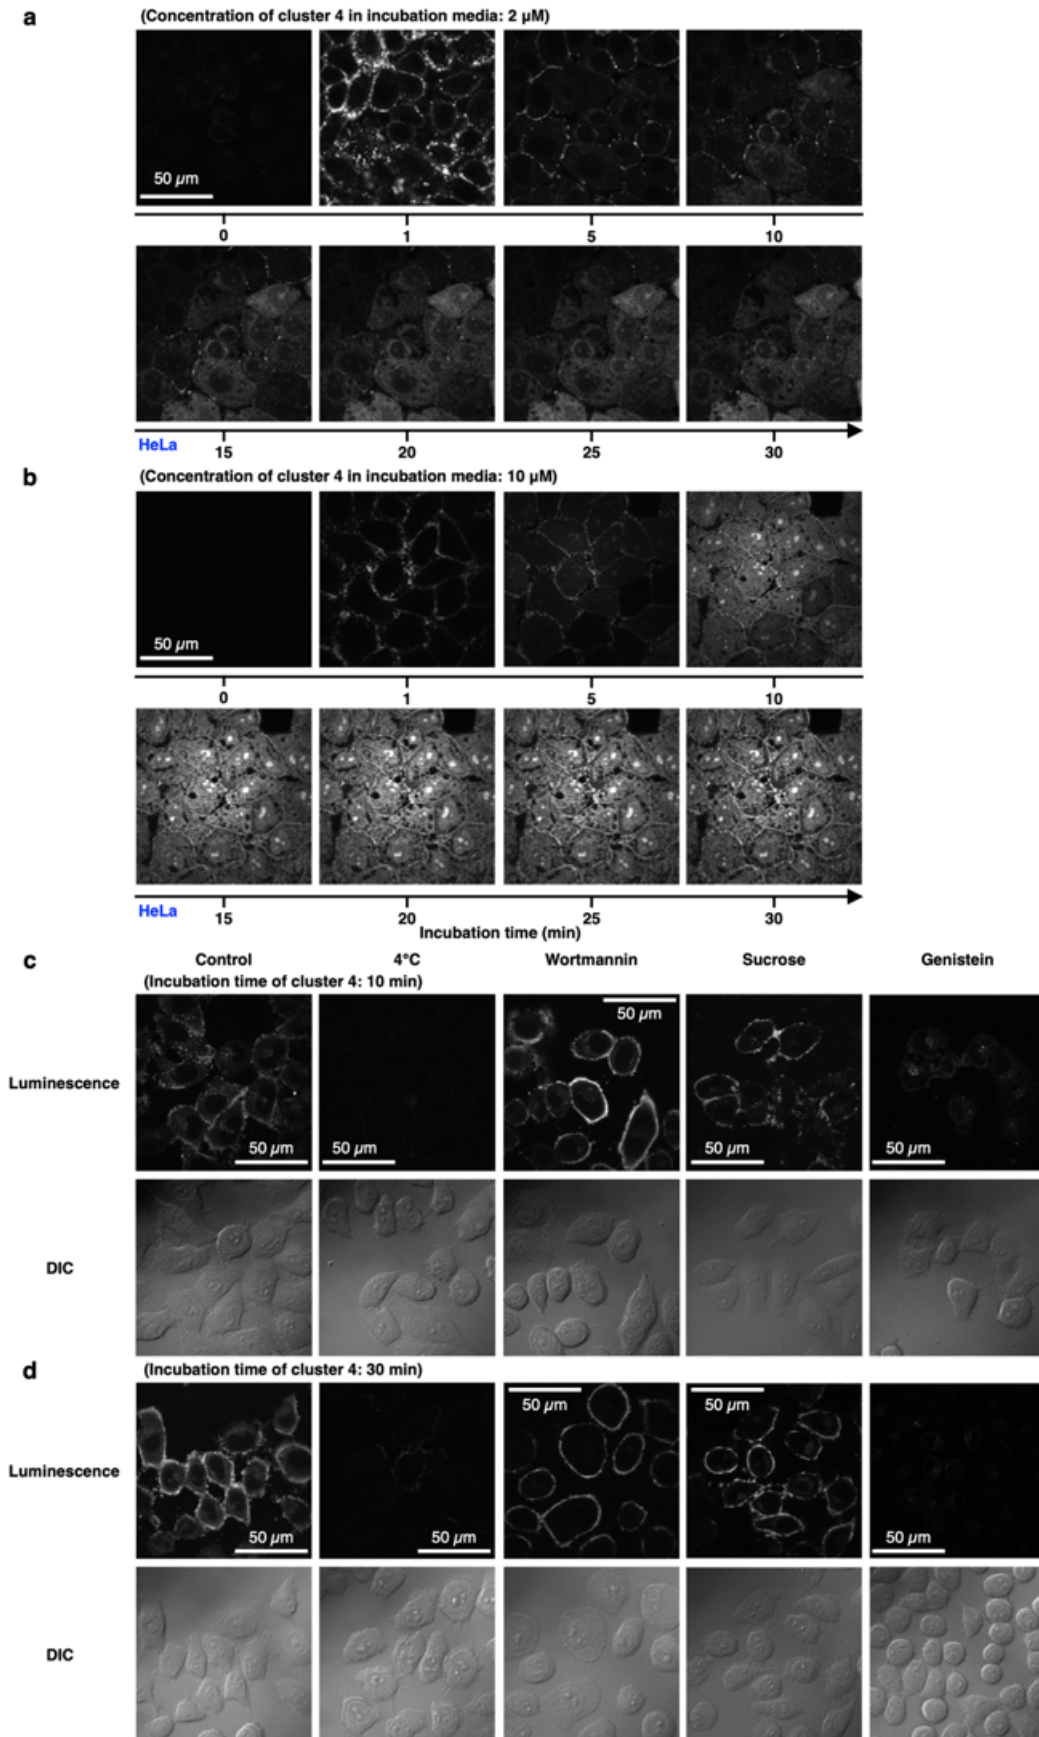

Supplementary Figure 76. Time-lapse images and uptake mechanism study of 4 in HeLa. Each experiment was repeated independently for at least three times with similar results. Scale bar, 50  $\mu\text{m}$

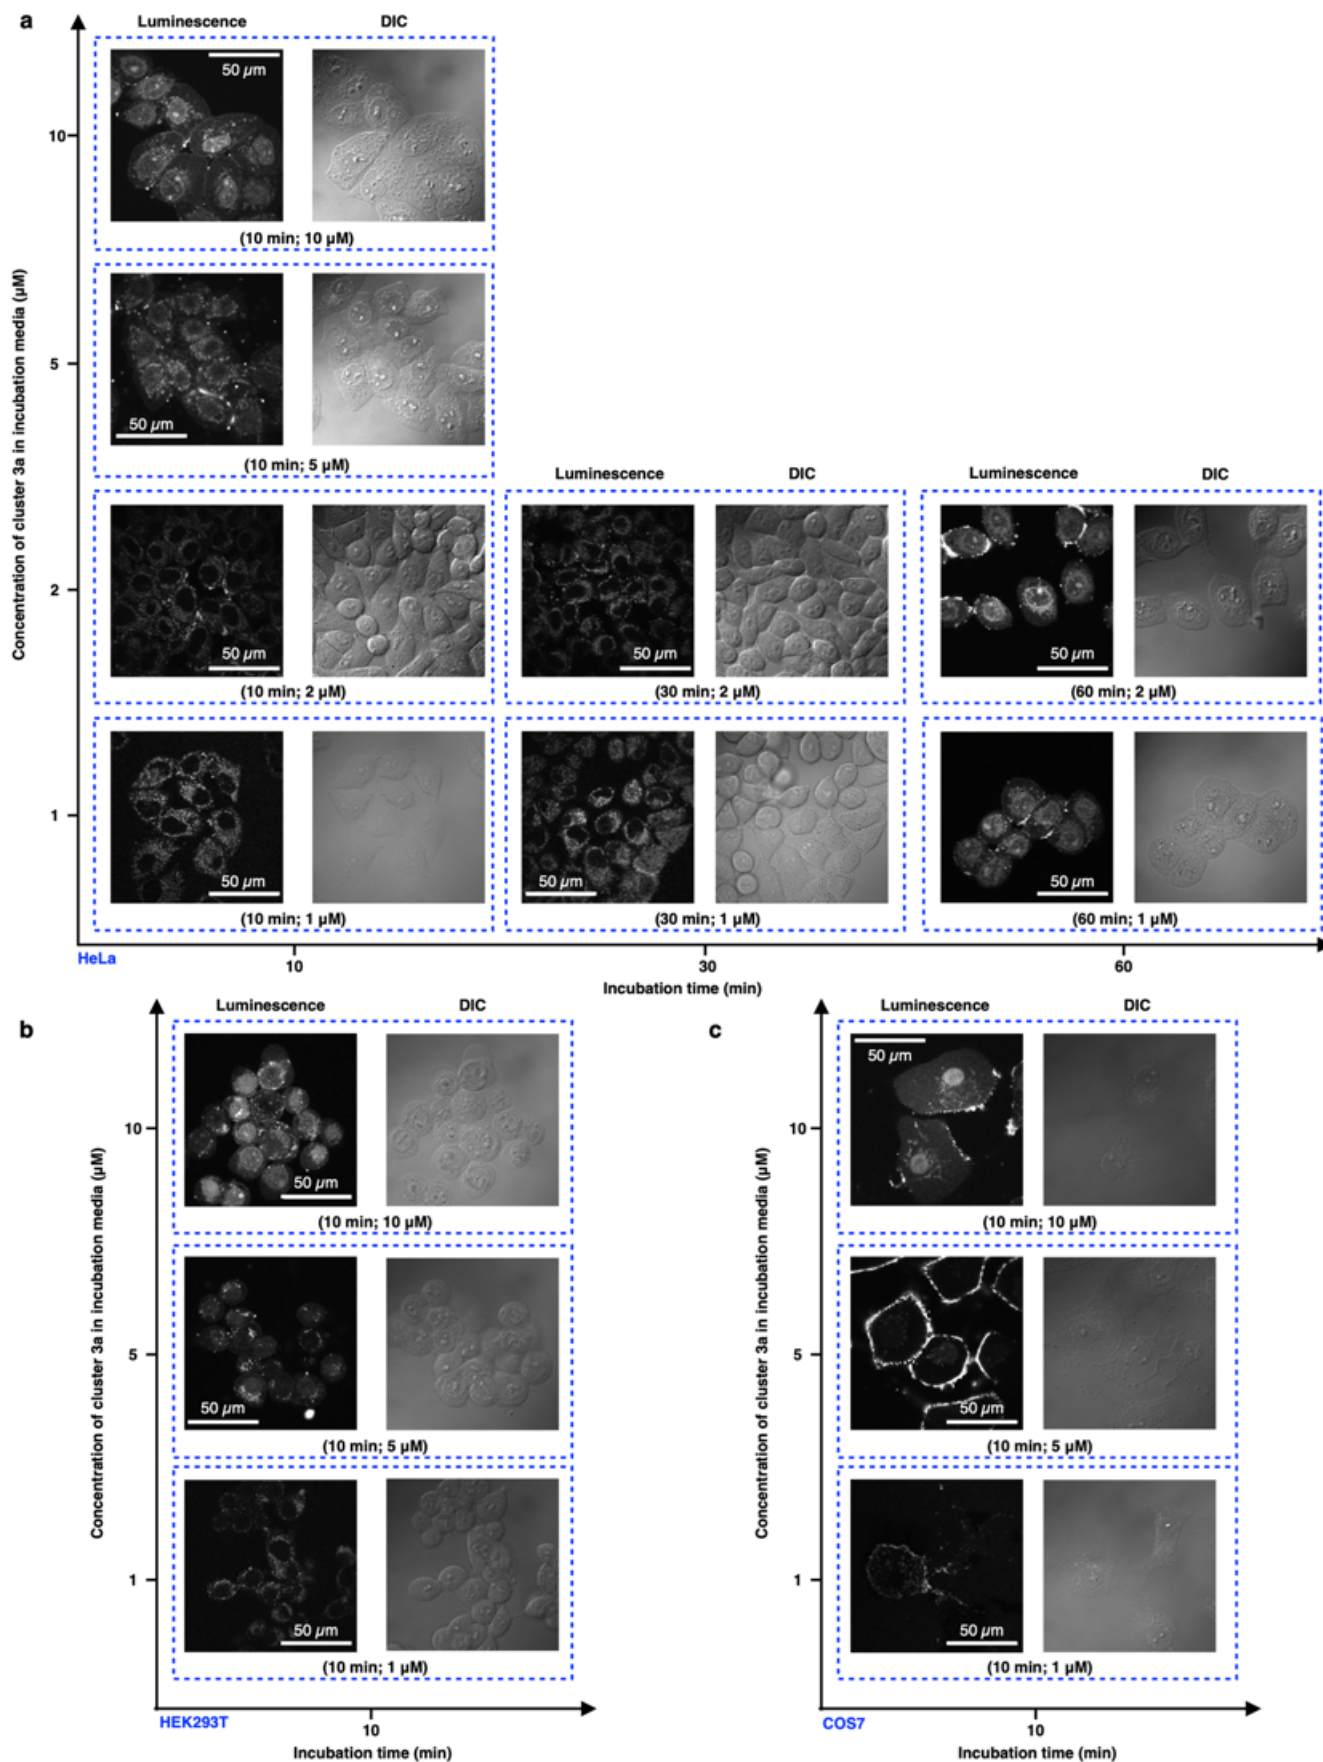

Supplementary Figure 77. Confocal luminescence images of **3a** in HeLa, HEK293T and COS7. Each experiment was repeated independently for at least three times with similar results. Scale bar, 50  $\mu\text{m}$

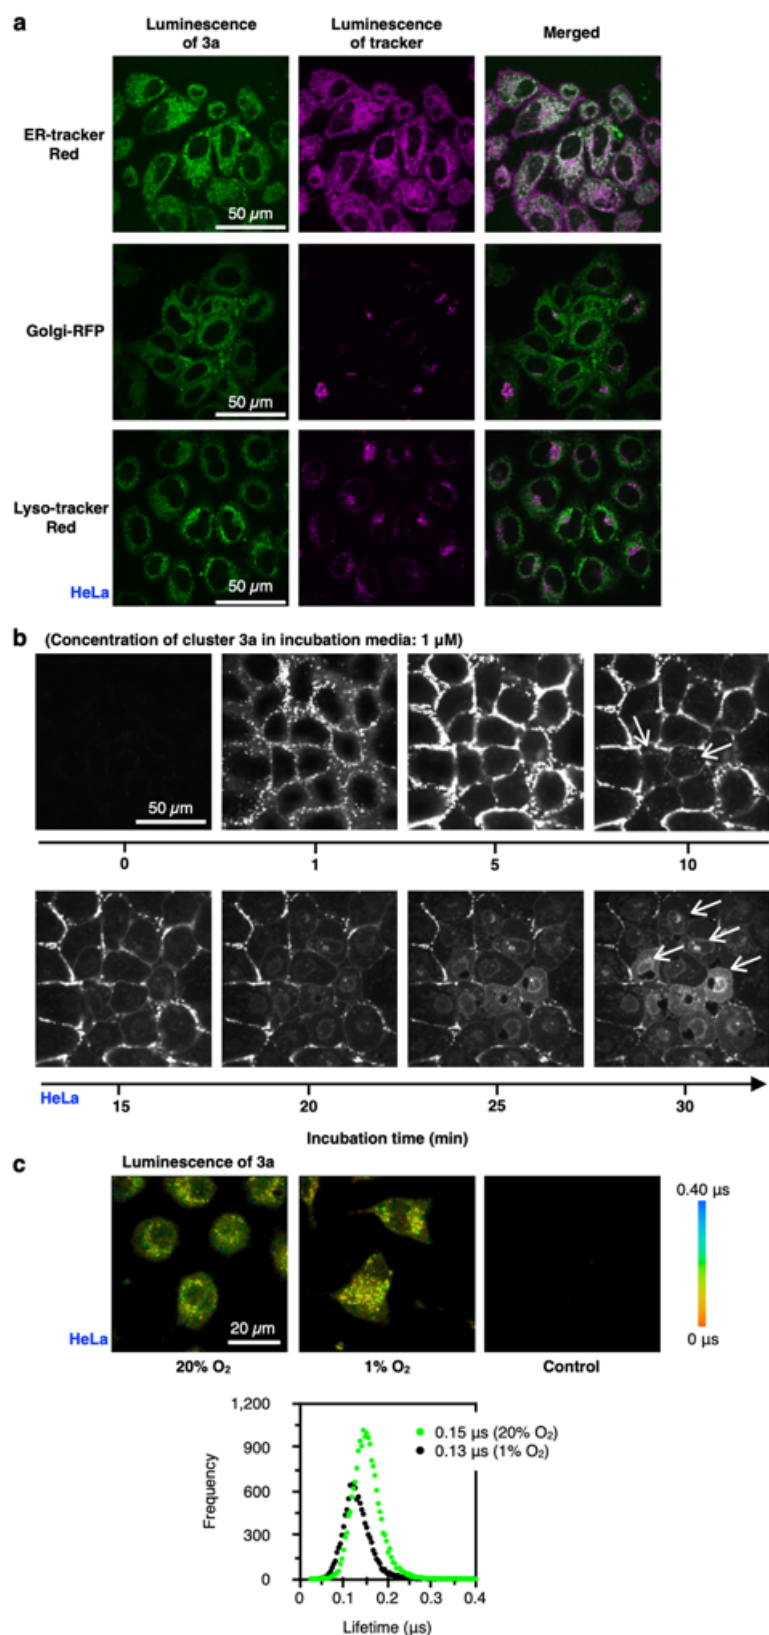

Supplementary Figure 78. Co-localization images, time-lapse images, and PLIM images and lifetime plot of **3a** in HeLa. In **b**, the white arrows indicate ER and nuclear accumulation at 10 and 30 min, respectively. Each experiment was repeated independently for at least three times with similar results. Scale bar, 50 μm

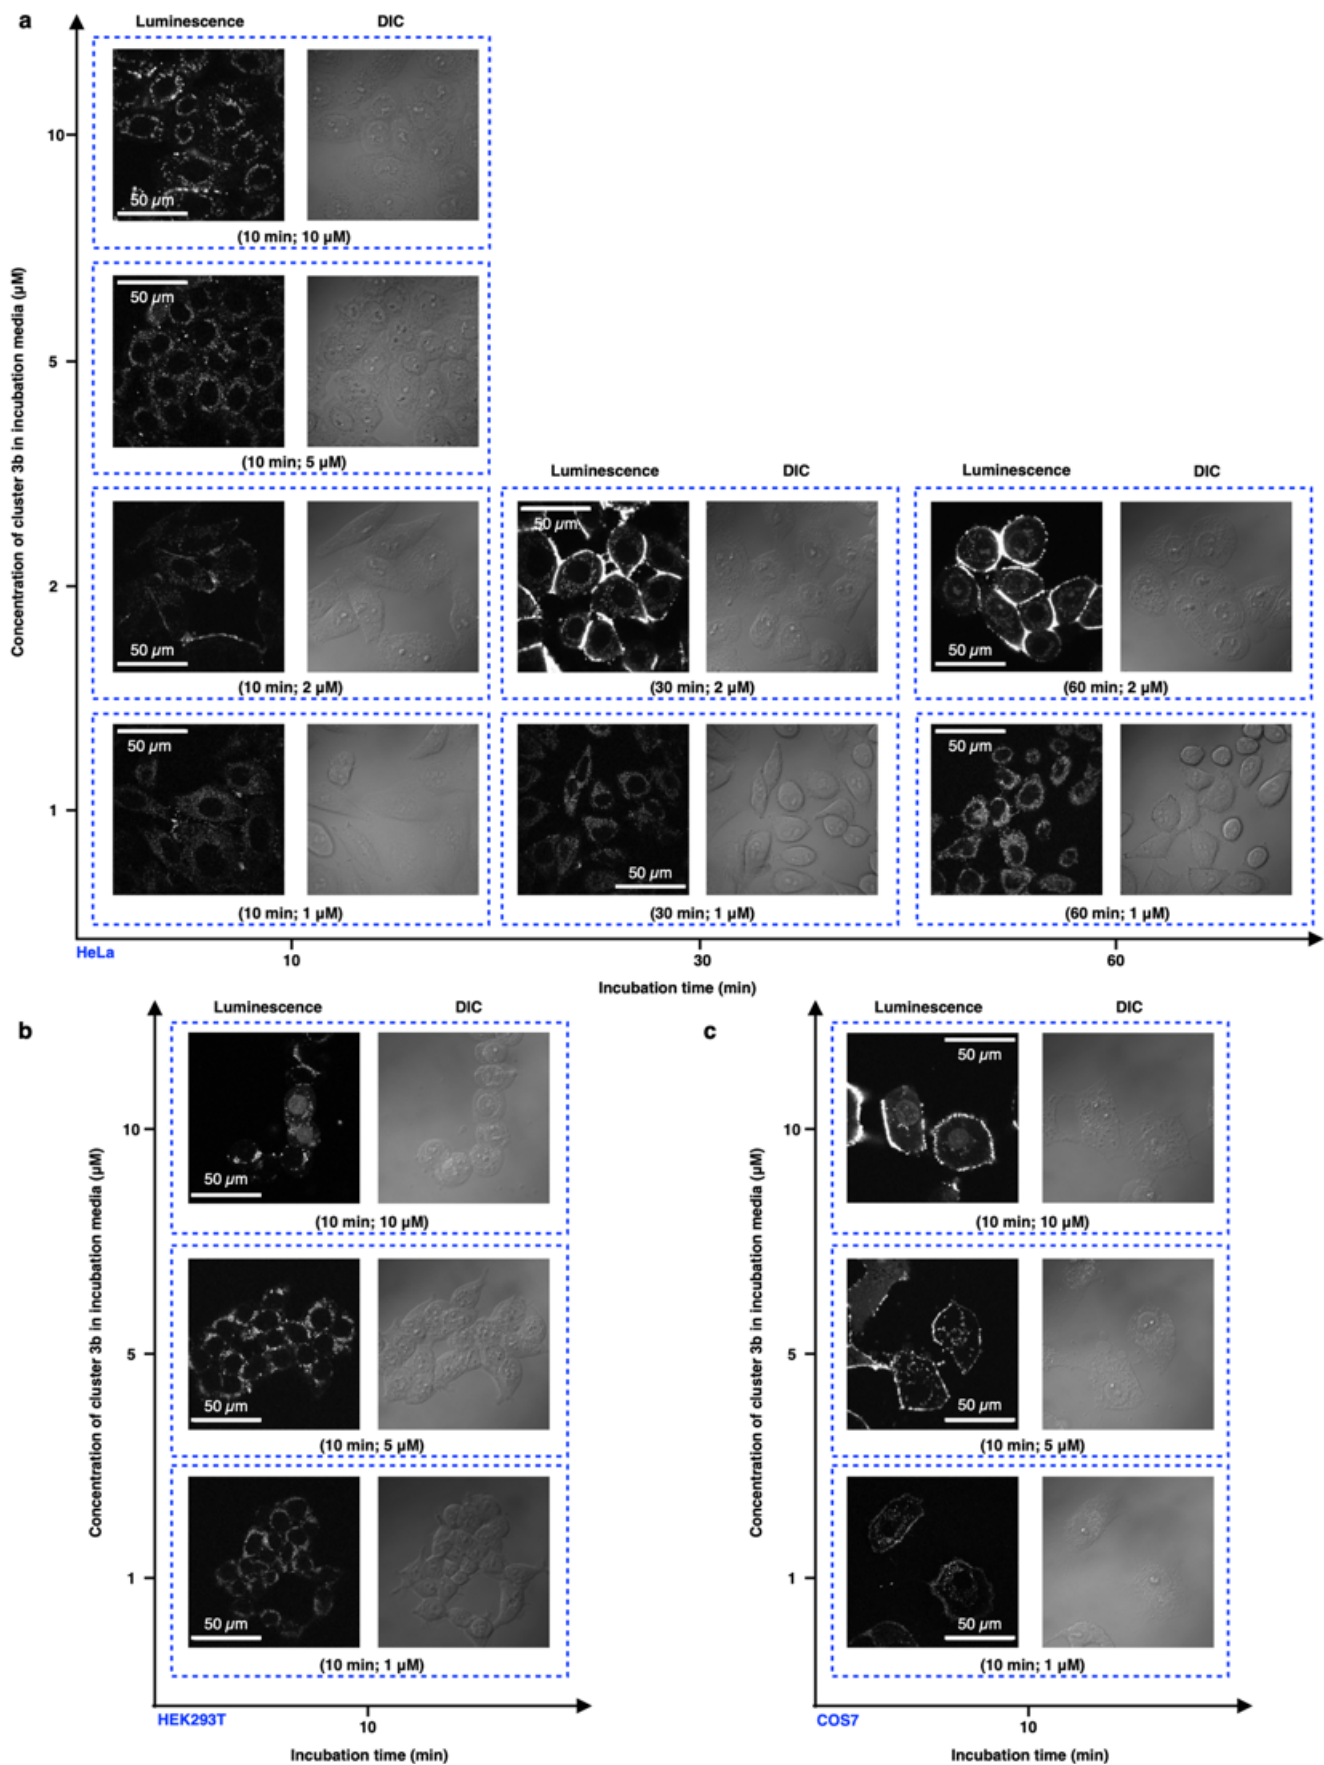

Supplementary Figure 79. Confocal luminescence images of **3b** in HeLa, HEK293T and COS7. Each experiment was repeated independently for at least three times with similar results. Scale bar, 50  $\mu\text{m}$

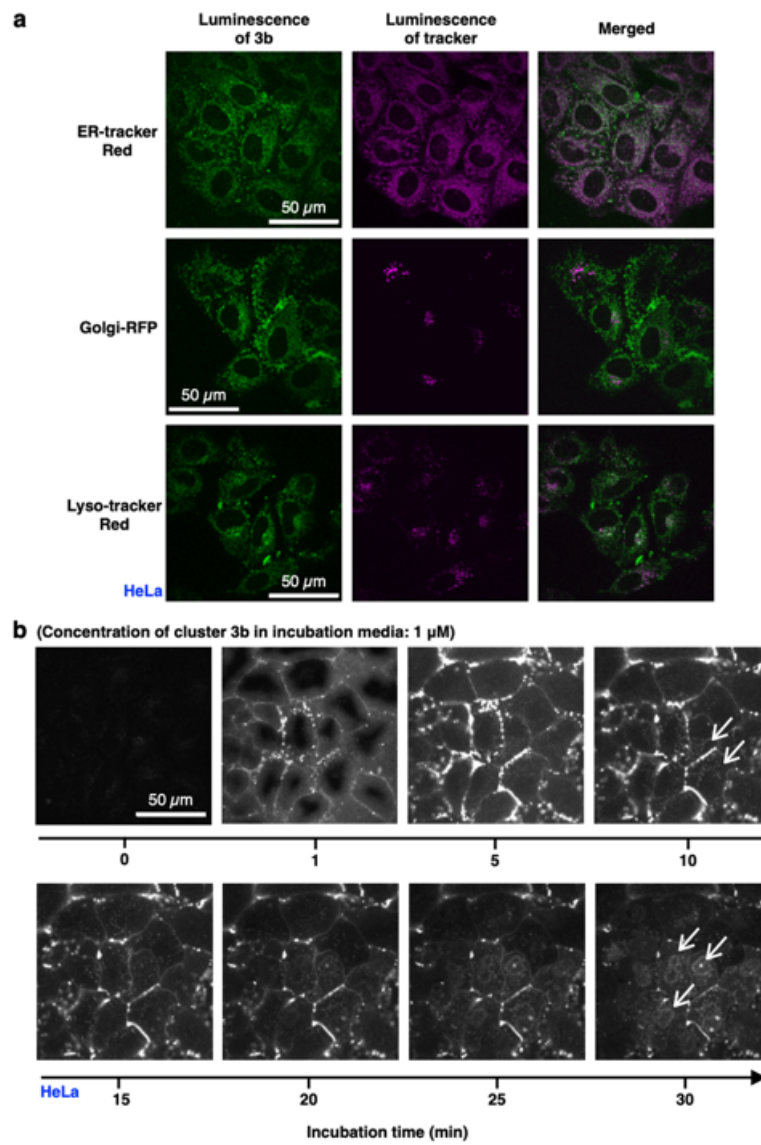

Supplementary Figure 80. Co-localization and time-lapse images of **3b** in HeLa. In **b**, the white arrows indicate ER and nuclear accumulation at 10 and 30 min, respectively. Each experiment was repeated independently for at least three times with similar results. Scale bar, 50 μm



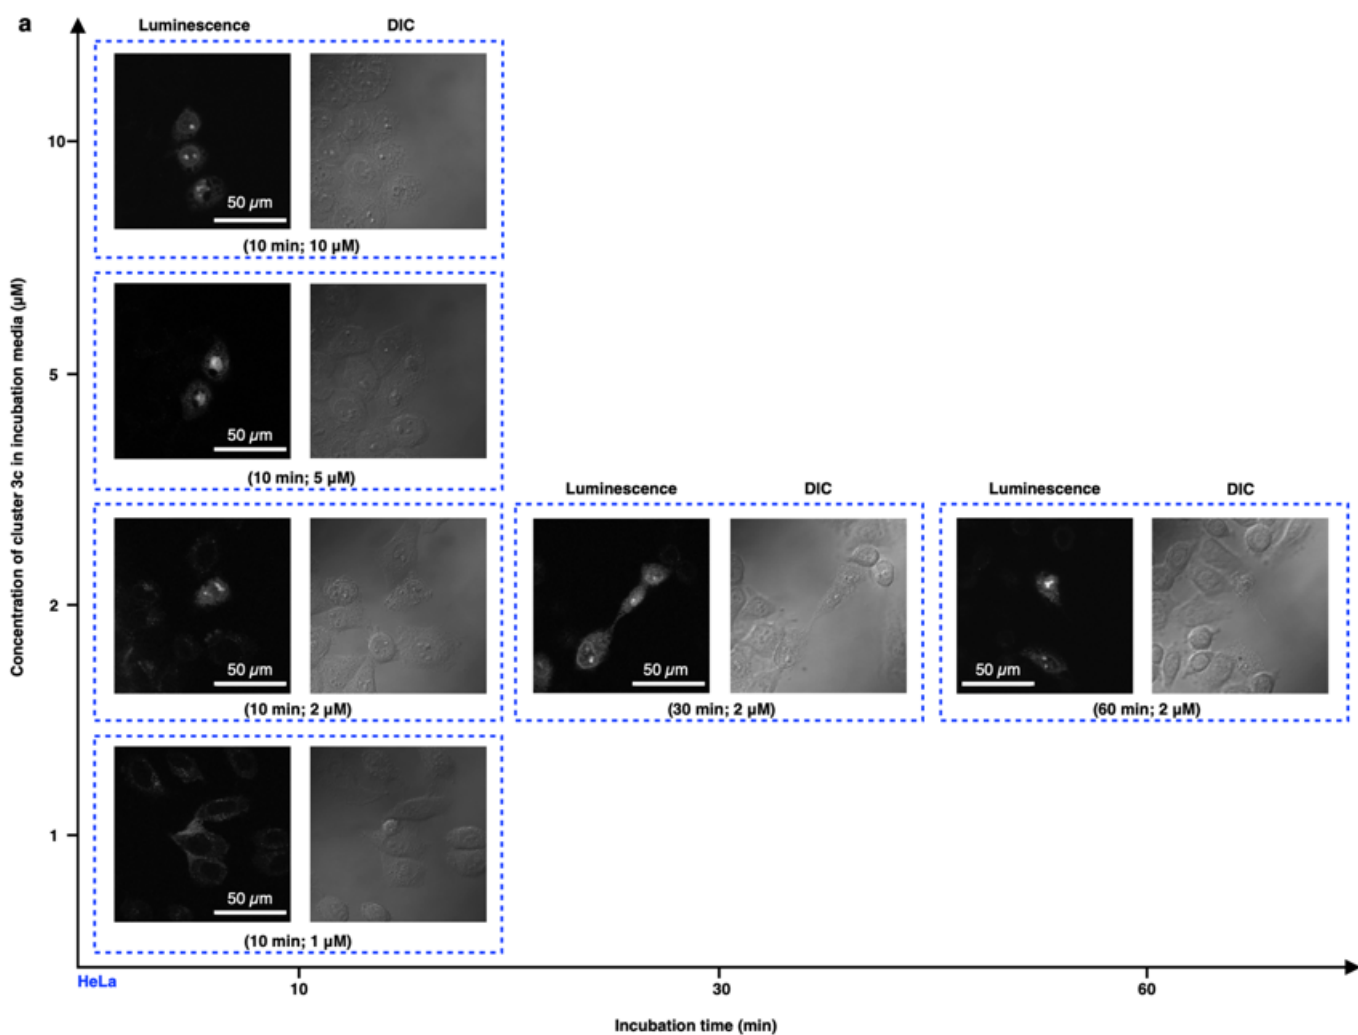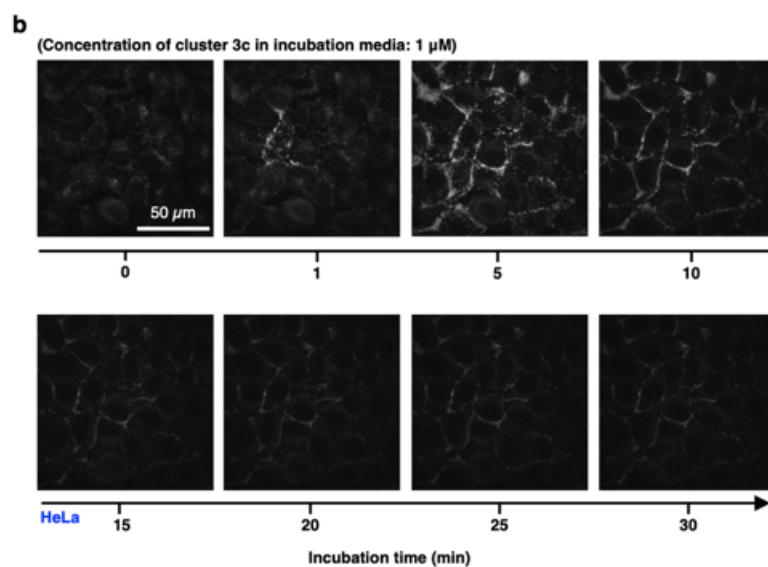

Supplementary Figure 81. Confocal luminescence and time-lapse images of **3c** in HeLa. Each experiment was repeated independently for at least three times with similar results. Scale bar, 50  $\mu\text{m}$

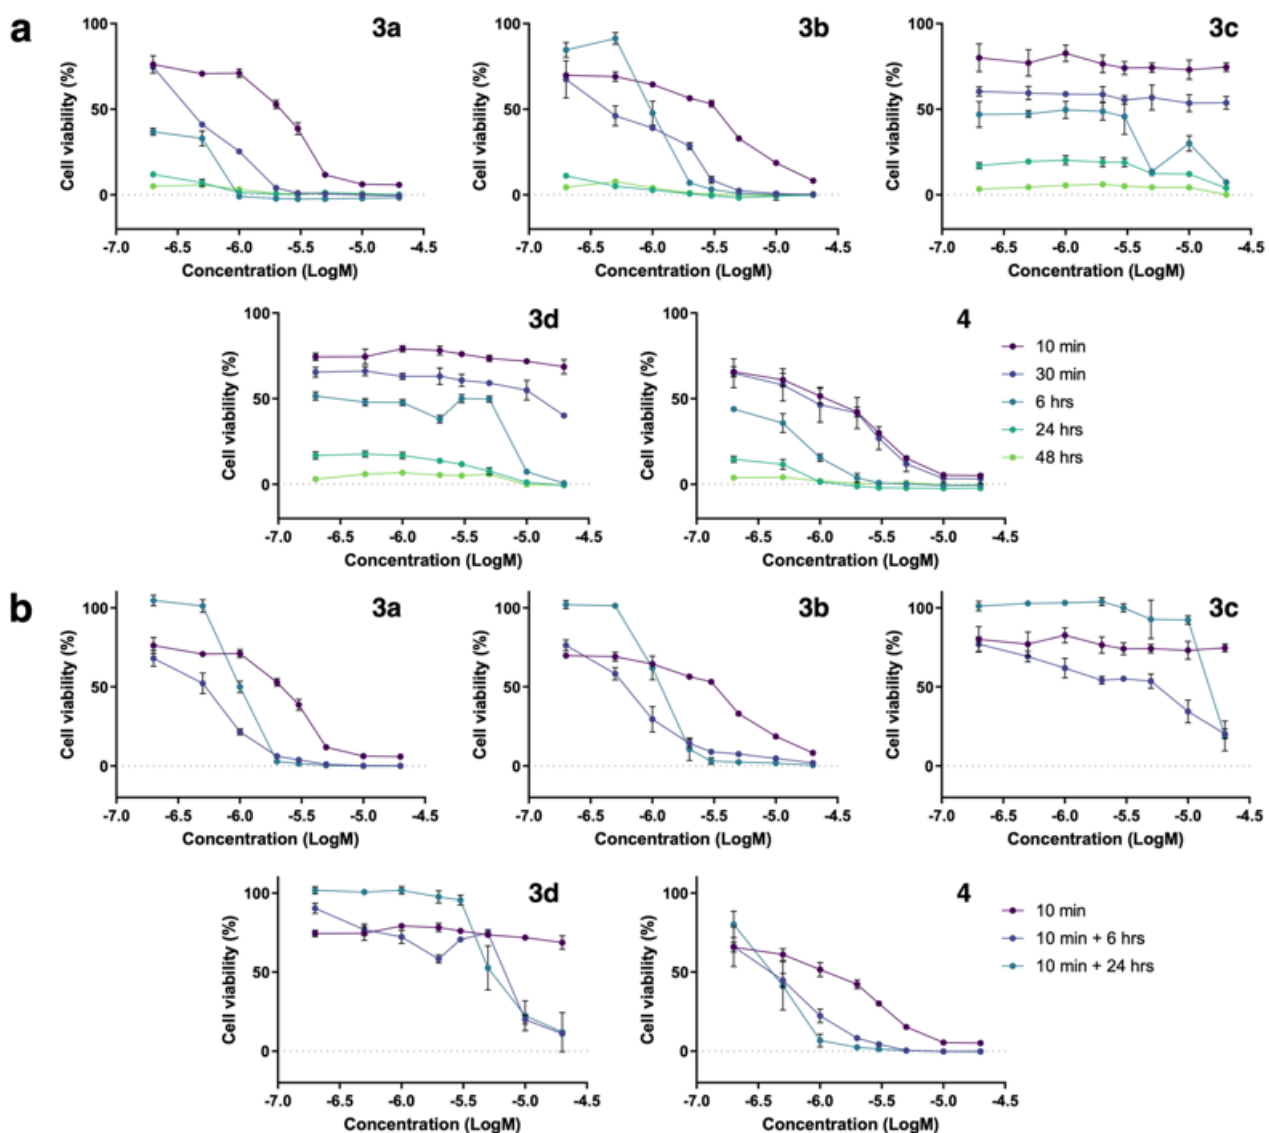

Supplementary Figure 82. Cytotoxicity of **3a-d** and **4**. **a**, Viabilities of the cells labeled with **3a-d** and **4** for different incubation times. HeLa cells were labeled with different concentrations (0.2, 0.5, 1, 2, 3, 5, 10, and 20  $\mu\text{M}$ ) of **3a-d** or **4** for the indicated time. The cell viability was analyzed by alamarBlue. Mean  $\pm$  SD ( $n = 3$ ). **b**, Cell viability after labeling with **3a-d** and **4**. HeLa cells were labeled with different concentrations (0.2, 0.5, 1, 2, 3, 5, 10, and 20  $\mu\text{M}$ ) of **3a-d** or **4** for 10 min and incubated with DMEM 10% FBS for each indicated time. Then, the cell viability was analyzed by alamarBlue. Mean  $\pm$  SD ( $n = 3$ ).

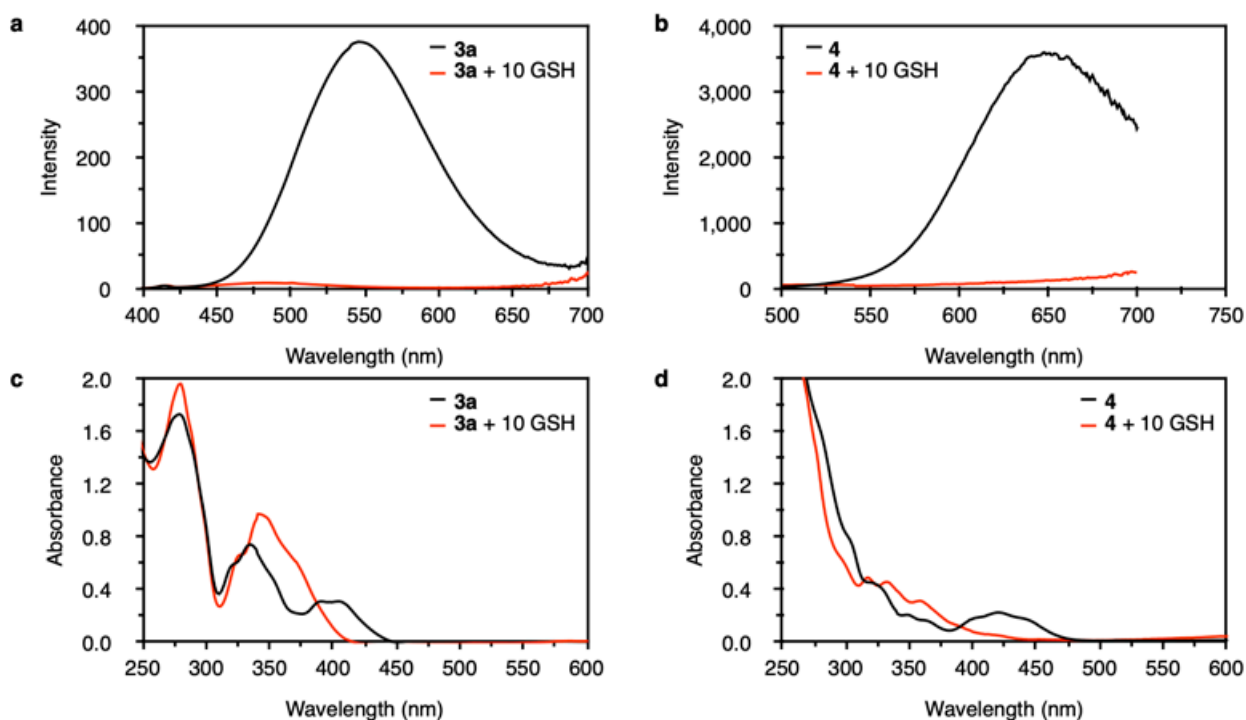

Supplementary Figure 83. Reactivities of **3a** and **4** to glutathione (GSH). (a,b) Emission spectra of **3a** and **4** with or without GSH (10 equiv.) in CH<sub>2</sub>Cl<sub>2</sub>/CH<sub>3</sub>OH (1:1, v:v). (c,d) UV-Vis absorption spectra of **3a** and **4** with or without the presence of GSH (10 equiv.) in CH<sub>2</sub>Cl<sub>2</sub>/CH<sub>3</sub>OH (1:1, v:v). ( $c = 1.0 \times 10^{-5}$  M,  $\lambda_{\text{ex}} = 365$  nm for **3a**;  $c = 2.0 \times 10^{-5}$  mol/L,  $\lambda_{\text{ex}} = 425$  nm for **4**)

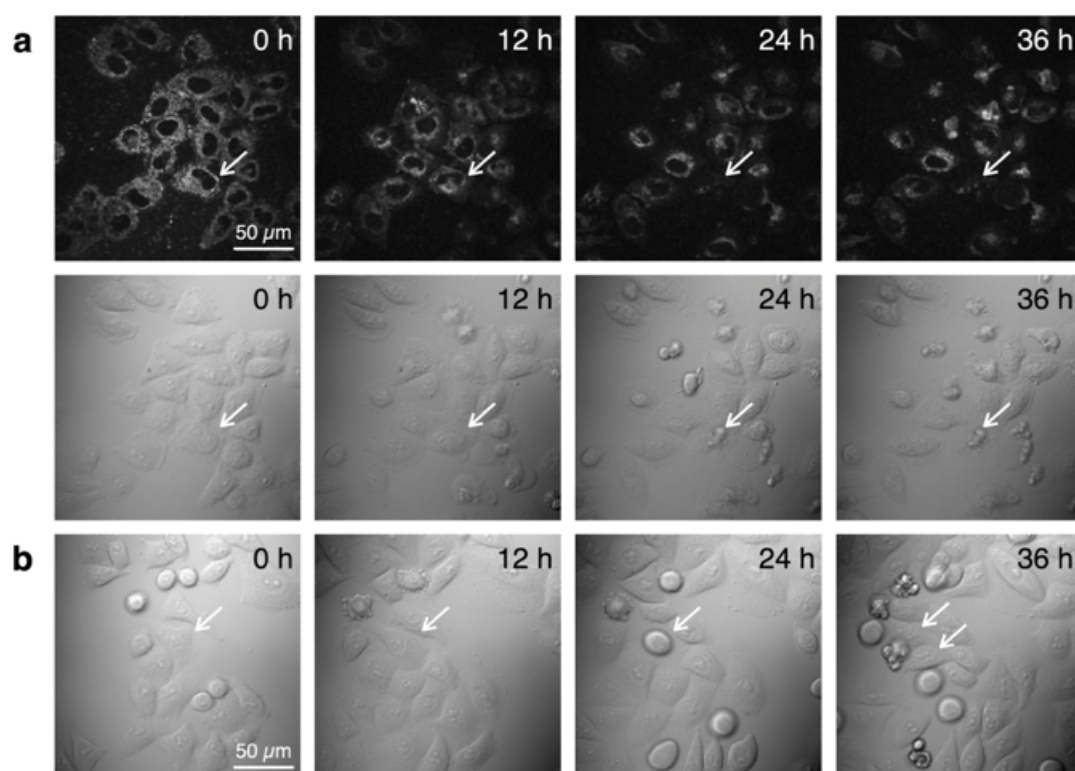

Supplementary Figure 84. Time-lapse images to monitor labeled HeLa cells. **a**, Confocal luminescence and DIC images of HeLa cells labeled with **3a**. White arrows indicate the dying labeled cell. **b**, Confocal luminescence images of unlabeled HeLa cells. White arrows indicate the dividing cell. The images were taken at 37°C 5% CO<sub>2</sub>. Each experiment was repeated independently for at least three times with similar results. Scale bar, 50 μm

## Supplementary References

1. Warsink, S., Bosman, S., Weigand, J. J., Elsevier, C. J. Rigid pyridyl substituted NHC ligands, their Pd(0) complexes and their application in selective transfer semihydrogenation of alkynes. *Appl. Organometal. Chem.* **25**, 276–282 (2011).
2. Barbante, G. J. et al. Electrochemiluminescent ruthenium(II) N-heterocyclic carbene complexes: a combined experimental and theoretical study. *Inorg. Chem.* **52**, 7448–7459 (2013).
3. Stanton III, C. J. et al. Re(I) NHC complexes for electrocatalytic conversion of CO<sub>2</sub>. *Inorg. Chem.* **55**, 3136–3144 (2016).
4. Thenarukandiyil, R., Dutta, C., Choudhury, J. Switching of reaction pathway from C–C rollover to C–N ring-extension annulation. *Chem. Eur. J.* **23**, 15529–15533 (2017).
5. Raba, A. et al. Facile and scalable preparation of 2-imidazolylpyridines. *Tetrahedron Lett.* **54**, 3384–3387 (2013).
6. Gründemann, S., Albrecht, M., Kovacevic, A., Faller, J. W., Crabtree, R. H. Bis-carbene complexes from oxidative addition of imidazolium C–H bonds to palladium(0). *J. Chem. Soc., Dalton Trans.* 2163–2167 (2002).
7. Lei, Z., Nagata, K., Ube, H., Shionoya, M. Ligand effects on the photophysical properties of N,N'-diisopropylbenzimidazolylidene-protected C-centered hexagold(I) clusters. *J. Organomet. Chem.* **917**, 121271 (2020).
8. Ube, H., Zhang, Q., Shionoya, M. A carbon-centered hexagold(I) cluster supported by N-heterocyclic carbene ligands. *Organometallics* **37**, 2007–2009 (2018).
9. Lei, Z., Wang, Q.-M. Homo and heterometallic gold(I) clusters with hypercoordinated carbon. *Coord. Chem. Rev.* **378**, 382–394 (2019).
10. Lei, Z., Pei, X.-L., Jiang, Z.-G., Wang, Q.-M. Cluster linker approach: preparation of a luminescent porous framework with NbO topology by linking silver ions with gold(I) clusters. *Angew. Chem. Int. Ed.* **53**, 12771–12775 (2014).
11. Lei, Z., Pei, X.-L., Guan, Z.-J., Wang, Q.-M. Full protection of intensely luminescent gold(I)-silver(I) cluster by phosphine ligands and inorganic anions. *Angew. Chem. Int. Ed.* **56**, 7117–7120 (2017).
12. Jia, J.-H., Wang, Q.-M. Intensely luminescent gold(I)-silver(I) cluster with hypercoordinated carbon. *J. Am. Chem. Soc.* **131**, 16634–16635 (2009).
13. Becke, A. D. A new mixing of Hartree–Fock and local density-functional theories. *J. Chem. Phys.* **98**, 1372–1377 (1993).
14. Hay, P. J., Wadt, W. R. *Ab initio* effective core potentials for molecular calculations. Potentials for K to Au including the outermost core orbitals. *J. Chem. Phys.* **82**, 299–310 (1985).
15. Hehre, W. J., Ditchfield, R., Pople, J. A. Self-consistent molecular orbital methods. XII. Further extensions of Gaussian-type basis sets for use in molecular orbital studies of organic molecules. *J. Chem. Phys.* **56**, 2257–2261 (1972).
16. Cancès, E., Mennucci, B., Tomasi, J. A new integral equation formalism for the polarizable continuum model: Theoretical background and applications to isotropic and anisotropic dielectrics. *J. Chem. Phys.* **107**, 3032–3041 (1997).
17. Andrae, D., Häußermann, U., Dolg, M., Stoll, H., Preuß, H. Energy-adjusted *ab initio* pseudopotentials for the second and third row transition elements. *Theor. Chim. Acta* **77**, 123–141 (1990).
18. Grimme, S., Antony, J., Ehrlich, S., Krieg, H. A consistent and accurate *ab initio* parametrization of density functional dispersion correction (DFT-D) for the 94 elements H–Pu. *J. Chem. Phys.* **132**, 154104 (2010).
19. Zhao, Y., Truhlar, D. G. The M06 suite of density functionals for main group thermochemistry, thermochemical kinetics, noncovalent interactions, excited states, and transition elements: two new functionals and systematic testing of four M06-class functionals and 12 other functionals. *Theor. Chem. Acc.* **120**, 215–241 (2008).

20. Frisch, M. J. et al. Gaussian 16 ver. A03.
21. Lu, T., Chen, F. Multiwfn: A multifunctional wavefunction analyzer. *J. Comput. Chem.* **33**, 580–592 (2012).
22. Wang, F., Ziegler, T. A simplified relativistic time-dependent density-functional theory formalism for the calculations of excitation energies including spin-orbit coupling effect. *J. Chem. Phys.* **123**, 154102 (2005).
23. Te Velde, G., et al. Chemistry with ADF. *J. Comput. Chem.* **22**, 931–967 (2001).
24. (a) Harvey, J. N., Aschi, M. Spin-forbidden dehydrogenation of methoxy cation: a statistical view. *Phys. Chem. Chem. Phys.* **1**, 5555–5563 (1999). (b) Harvey, J. N., Aschi, M., Schwarz, H., Koch, W. The singlet and triplet states of phenyl cation. A hybrid approach for locating minimum energy crossing points between non-interacting potential energy surfaces. *Theor. Chem. Acc.* **99**, 95–99 (1998).
25. Kurokawa, H., Ito, H., Inoue, M., Tabata, K., Sato, Y., Yamagata, K., Kizaka-Kondoh, S., Kadonosono, T., Yano, S., Inoue, M., Kamachi, T., High resolution imaging of intracellular oxygen concentration by phosphorescence lifetime. *Sci. Rep.* **5**, 10657 (2015).
26. Gabbaï, F. P., Schier, A., Riede, J., Schmidbaur, H. Synthesis of the hexakis[(triphenylphosphane)gold(I)]methanium(2+) cation from trimethylsilyldiazomethane; crystal structure determination of the tetrafluoroborate salt. *Chem. Ber.* **130**, 111–113 (1997).
27. Narouz, M. R. et al. N-heterocyclic carbene-functionalized magic-number gold nanoclusters. *Nat. Chem.* **11**, 419–425 (2019).
28. Narouz, M. R. et al. Robust, highly luminescent Au<sub>13</sub> superatoms protected by N-heterocyclic carbenes. *J. Am. Chem. Soc.* **141**, 14997–15002 (2019).
29. Shen, H. et al. Highly robust but surface-active: an N-heterocyclic carbene-stabilized Au<sub>25</sub> nanocluster. *Angew. Chem. Int. Ed.* **58**, 17731–17735 (2019).
30. Shen, H. et al. Superatomic Au<sub>13</sub> clusters ligated by different N-heterocyclic carbenes and their ligand-dependent catalysis, photoluminescence, and proton sensitivity. *Nano Res.* **13**, 1908–1911 (2020).
31. Shen, H. et al. Surface coordination of multiple ligands endows N-heterocyclic carbene-stabilized gold nanoclusters with high robustness and surface reactivity. *Angew. Chem. Int. Ed.* **60**, 3752–3758 (2021).
32. Greisch, J.-F. et al. Gas-phase photoluminescence and photodissociation of silver-capped hexagold clusters. *J. Phys. Chem. A* **122**, 5799–5810 (2018).
33. Chen, M., Lei, Z., Feng, W., Li, C., Wang, Q.-M. & Li, F. A phosphorescent silver(I)–gold(I) cluster complex that specifically lights up the nucleolus of living cells with FLIM imaging. *Biomaterials* **34**, 4284–4295 (2013).
